# Supplementary material
Source: PubMed Central journal article supplement (PMC7654568)

# Palladium-Catalyzed [3+2] Cycloaddition via Two-Fold 1,3-C(sp<sup>3</sup>)-H Activation

Hojoon Park, and Jin-Quan Yu\*

*Department of Chemistry, The Scripps Research Institute, 10550 N. Torrey Pines Road, La Jolla, California 92037, United States*

## Table of Contents

|                                                                                            |          |
|--------------------------------------------------------------------------------------------|----------|
| 1. General information -----                                                               | S2       |
| 2. Experimental Section -----                                                              | S2       |
| 2.1 Synthesis of substrates and ligands -----                                              | S2       |
| 2.2 General procedure for Pd-catalyzed [3+2] reaction -----                                | S2-S20   |
| 2.3 Evaluation of electron-deficient olefins -----                                         | S20      |
| 2.4 Procedure for gram-scale reaction & silver-free reaction -----                         | S21-S22  |
| 2.5 Attempted reaction with Heck byproduct <b>55</b> -----                                 | S22      |
| 2.6 Attempted reaction with pivalic acid -----                                             | S22      |
| 2.7 Desymmetrization of <b>20</b> -----                                                    | S22-S23  |
| 2.8 X-Ray Crystallographic Data of <b>31-maj</b> , <b>31-min</b> , and <b>28-maj</b> ----- | S24-S27  |
| 3. References -----                                                                        | S27      |
| 4. <sup>1</sup> H and <sup>13</sup> C NMR Spectra -----                                    | S28-S106 |

## 1. General Information

Solvents were obtained from Sigma-Aldrich, Alfa-Aesar, Oakwood, and Acros and used directly without further purification. Analytical thin layer chromatography was performed on 0.25 mm silica gel 60-F254. Visualization was carried out with UV light.  $^1\text{H}$  NMR was recorded on Bruker instrument (600 MHz). Chemical shifts were reported in parts per million (ppm) referenced to 0.0 ppm for tetramethylsilane.  $^{13}\text{C}$  NMR was recorded on Bruker instrument (150 MHz), and were fully decoupled by broad band proton decoupling. Chemical shifts were reported in ppm referenced to 77.16 ppm for center line of chloroform. The following abbreviations (or combinations thereof) were used to explain multiplicities: s = singlet, d = doublet, t = triplet, q =quartet, m = multiplet, br = broad. Coupling constants,  $J$ , were reported in Hertz unit (Hz). High-resolution mass spectra (HRMS) were recorded on an Agilent Mass spectrometer using ESI-TOF (electrospray ionization-time of flight). Enantiomeric excess value was determined on an Agilent 1260 Infinity SFC system using commercially available chiral columns.

## 2. Experimental Section

### 2.1 Synthesis of substrates and ligands

1) Amide substrates were synthesized from corresponding carboxylic acids which were obtained from commercial sources or prepared following literature procedures.<sup>1-3</sup>

2) Pyridine-3-sulfonic acid ligand **L4** was synthesized following literature procedures.<sup>3</sup>

### 2.2 General procedure for Pd-catalyzed [3+2] reaction

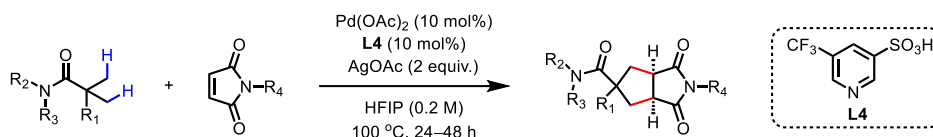

A sealed tube with magnetic stir bar was charged with  $\text{Pd}(\text{OAc})_2$  (10 mol%, 2.2 mg), **L4** (10 mol%, 2.3 mg), AgOAc (0.2 mmol, 33.4 mg), corresponding maleimide (0.15 mmol) and amide substrate (0.1 mmol). HFIP (0.5 mL) was added, and the reaction mixture was stirred at 100 °C for 24 to 48 hours. Upon completion, the reaction mixture was cooled to room temperature, diluted with EtOAc, filtered through a celite plug, and concentrated *in vacuo*. The crude reaction mixture was purified by flash chromatography or pTLC to afford the desired products.

1) In most cases, both diastereomers were isolated separately and characterized. Otherwise, the product was isolated as a mixture of diastereomers. In these cases, if possible, analytical amount of the major diastereomer was purified for characterization.

2) Isolated yields are adjusted based on the amount of solvent observed in the  $^1\text{H}$  NMR.

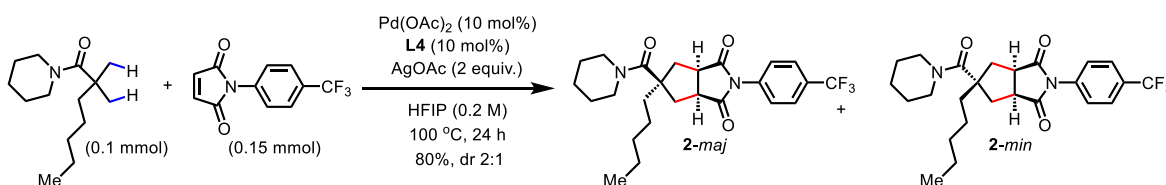

**2-maj** (24.7 mg) and **2-min** (12.5 mg) were isolated separately following the general procedure.

$^1\text{H}$  NMR (**2-maj**, 600 MHz,  $\text{CDCl}_3$ )  $\delta$  7.70 (d,  $J$  = 8.6 Hz, 2H), 7.56 (d,  $J$  = 8.3 Hz, 2H), 3.46 (br s, 4H), 3.38 – 3.32 (m, 2H), 3.08 (d,  $J$  = 13.4 Hz, 2H), 1.87 (ddd,  $J$  = 13.7, 7.4, 2.5 Hz, 2H), 1.71 – 1.67 (m, 2H), 1.57 – 1.52 (m, 3H), 1.40 – 1.19 (m, 9H), 0.87 (t,  $J$  = 7.0 Hz, 3H).

$^{13}\text{C}$  NMR (**2-maj**, 151 MHz,  $\text{CDCl}_3$ )  $\delta$  178.65, 171.71, 135.82, 130.31 (q,  $J$  = 32.7 Hz), 127.05, 126.08 (q,  $J$  = 3.7 Hz), 123.97 (q,  $J$  = 272.1 Hz), 54.72, 47.98, 44.93, 40.44, 39.20, 32.26, 25.87, 25.51, 24.59, 22.52, 14.05.

HRMS (ESI-TOF):  $\text{C}_{25}\text{H}_{32}\text{F}_3\text{N}_2\text{O}_3$  [ $\text{M}+\text{H}$ ] calculated 465.2365, found 465.2368.

$^1\text{H}$  NMR (**2-min**, 600 MHz,  $\text{CDCl}_3$ )  $\delta$  7.74 (d,  $J = 8.3$  Hz, 2H), 7.46 (d,  $J = 8.3$  Hz, 2H), 3.57 (t,  $J = 5.5$  Hz, 4H), 3.47 – 3.41 (m, 2H), 2.89 (dd,  $J = 13.4, 9.6$  Hz, 2H), 1.99 (dd,  $J = 13.9, 5.5$  Hz, 2H), 1.71 – 1.66 (m, 2H), 1.64 – 1.53 (m, 6H), 1.31 – 1.18 (m, 6H), 0.86 (t,  $J = 7.1$  Hz, 3H).

$^{13}\text{C}$  NMR (**2-min**, 151 MHz,  $\text{CDCl}_3$ )  $\delta$  178.56, 171.73, 135.22, 130.59 (q,  $J = 32.9$  Hz), 126.61, 126.39 (q,  $J = 3.8$  Hz), 123.80 (q,  $J = 272.4$  Hz), 57.13, 46.64, 44.98, 39.83, 38.37, 32.32, 26.38, 25.69, 24.68, 22.48, 14.06.

HRMS (ESI-TOF):  $\text{C}_{25}\text{H}_{32}\text{F}_3\text{N}_2\text{O}_3$  [M+H] calculated 465.2365, found 465.2356.

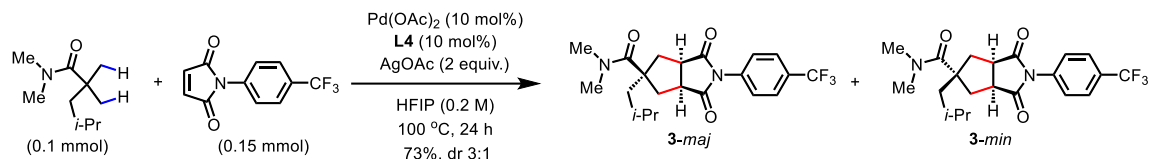

**3-maj** (22.4 mg) and **3-min** (7.5 mg) were isolated separately following the general procedure.

$^1\text{H}$  NMR (**3-maj**, 600 MHz,  $\text{CDCl}_3$ )  $\delta$  7.70 (d,  $J = 8.2$  Hz, 2H), 7.57 (d,  $J = 8.2$  Hz, 2H), 3.39 – 3.32 (m, 2H), 3.16 (d,  $J = 13.5$  Hz, 2H), 3.09 (br s, 3H), 2.73 (br s, 3H), 1.87 (ddd,  $J = 13.7, 7.4, 2.5$  Hz, 2H), 1.71 (d,  $J = 6.5$  Hz, 2H), 1.66 – 1.58 (m, 1H), 0.88 (d,  $J = 6.6$  Hz, 6H).

$^{13}\text{C}$  NMR (**3-maj**, 151 MHz,  $\text{CDCl}_3$ )  $\delta$  178.62, 173.87, 135.78, 130.33 (q,  $J = 33.0$  Hz), 127.07, 126.10 (q,  $J = 3.8$  Hz), 123.96 (q,  $J = 272.3$  Hz), 54.36, 48.41, 44.97, 41.21, 38.88, 37.93, 26.44, 23.68.

HRMS (ESI-TOF):  $\text{C}_{21}\text{H}_{26}\text{F}_3\text{N}_2\text{O}_3$  [M+H] calculated 411.1896, found 411.1900.

$^1\text{H}$  NMR (**3-min**, 600 MHz,  $\text{CDCl}_3$ )  $\delta$  7.74 (d,  $J = 8.5$  Hz, 2H), 7.47 (d,  $J = 8.5$  Hz, 2H), 3.48 – 3.41 (m, 2H), 3.19 – 2.88 (m, 6H), 2.95 (dd,  $J = 13.5, 9.3$  Hz, 2H), 1.96 (dd,  $J = 13.8, 6.1$  Hz, 2H), 1.69 – 1.61 (m, 3H), 0.87 (d,  $J = 6.1$  Hz, 6H).

$^{13}\text{C}$  NMR (**3-min**, 151 MHz,  $\text{CDCl}_3$ )  $\delta$  178.46, 173.60, 135.20, 130.59 (q,  $J = 98.6$  Hz), 126.64, 126.40 (q,  $J = 3.7$  Hz), 123.81 (q,  $J = 272.3$  Hz), 56.86, 47.05, 45.04, 40.69, 38.56, 37.96, 26.25, 23.75.

HRMS (ESI-TOF):  $\text{C}_{21}\text{H}_{26}\text{F}_3\text{N}_2\text{O}_3$  [M+H] calculated 411.1896, found 411.1896.

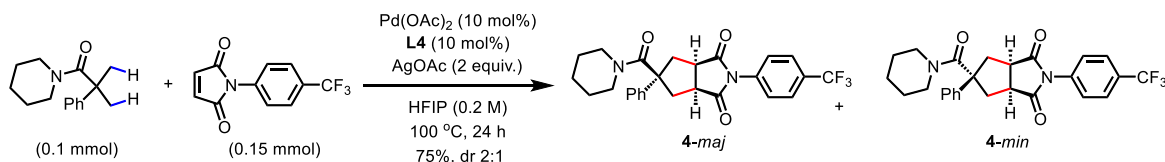

**4-maj** (24.4 mg) and **4-min** (11.0 mg) were isolated separately following the general procedure.

$^1\text{H}$  NMR (**4-maj**, 600 MHz,  $\text{CDCl}_3$ )  $\delta$  7.73 (d,  $J = 8.4$  Hz, 2H), 7.61 (d,  $J = 8.3$  Hz, 2H), 7.36 (t,  $J = 7.7$  Hz, 2H), 7.27 (t,  $J = 7.3$  Hz, 1H), 7.25 (dd,  $J = 8.3, 1.3$  Hz, 2H), 3.51 – 3.46 (m, 2H), 3.39 (br s, 2H), 3.12 (d,  $J = 13.5$  Hz, 2H), 3.02 (br s, 2H), 2.43 (ddt,  $J = 13.4, 8.7, 6.2$  Hz, 2H), 1.40 (p,  $J = 5.7$  Hz, 2H), 1.30 (br s, 2H), 1.04 (br s, 2H).

$^{13}\text{C}$  NMR (**4-maj**, 151 MHz,  $\text{CDCl}_3$ )  $\delta$  178.40, 171.72, 141.71, 135.94, 130.37 (q,  $J = 32.7$  Hz), 129.28, 127.34, 127.16, 126.17 (q,  $J = 3.8$  Hz), 125.04, 123.99 (q,  $J = 272.2$  Hz), 58.21, 47.66, 44.88, 44.28, 39.94, 25.11, 24.72, 24.34.

HRMS (ESI-TOF):  $\text{C}_{26}\text{H}_{26}\text{F}_3\text{N}_2\text{O}_3$  [M+H] calculated 471.1896, found 471.1889.

$^1\text{H}$  NMR (**4-min**, 600 MHz,  $\text{CDCl}_3$ )  $\delta$  7.68 (d,  $J = 8.5$  Hz, 2H), 7.33 – 7.30 (m, 2H), 7.28 – 7.23 (m, 5H), 3.57 (td,  $J = 5.5, 2.8$  Hz, 2H), 3.63 – 2.97 (m, 4H), 3.06 – 2.99 (m, 2H), 2.53 (dd,  $J = 13.7, 5.7$  Hz, 2H), 1.54 – 1.31 (m, 4H), 0.89 (br s, 2H).

$^{13}\text{C}$  NMR (**4-min**, 151 MHz,  $\text{CDCl}_3$ )  $\delta$  178.04, 171.30, 140.95, 134.98, 130.46 (q,  $J = 33.0$  Hz), 129.32, 127.49, 126.66, 126.17 (q,  $J = 3.6$  Hz), 125.61, 123.81 (q,  $J = 272.4$  Hz), 60.58, 47.30, 44.95, 44.52, 39.91, 25.41, 24.35.

HRMS (ESI-TOF):  $\text{C}_{26}\text{H}_{26}\text{F}_3\text{N}_2\text{O}_3$  [M+H] calculated 471.1896, found 471.1891.

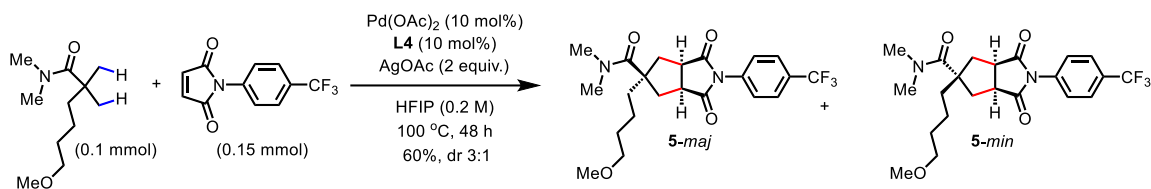

**5-maj** (20.6 mg) and **5-min** (6.7 mg) were isolated separately following the general procedure.

(**5-maj** was isolated as an inseparable mixture with a small amount of *N*-demethylated substrate (0.7 mg), and the accurate yield was calculated accordingly)

$^1\text{H NMR}$  (**5-maj**, 600 MHz,  $\text{CDCl}_3$ )  $\delta$  7.70 (d,  $J = 8.3$  Hz, 2H), 7.56 (d,  $J = 8.2$  Hz, 2H), 3.38 – 3.35 (m, 2H), 3.34 (t,  $J = 6.4$  Hz, 2H), 3.31 (s, 3H), 3.10 (d,  $J = 13.6$  Hz, 2H), 3.06 (br s, 3H), 2.76 (br s, 3H), 1.89 (ddd,  $J = 13.8, 7.4, 2.5$  Hz, 2H), 1.79 – 1.75 (m, 2H), 1.57 – 1.52 (m, 2H), 1.34 – 1.29 (m, 2H).

$^{13}\text{C NMR}$  (**5-maj**, 151 MHz,  $\text{CDCl}_3$ )  $\delta$  178.56, 173.45, 135.75, 130.34 (q,  $J = 33.0$  Hz), 127.07, 126.11 (q,  $J = 3.6$  Hz), 123.96 (q,  $J = 272.3$  Hz), 72.51, 58.79, 54.76, 44.96, 40.20, 38.70, 38.64, 38.00, 30.06, 23.05.

HRMS (ESI-TOF):  $\text{C}_{22}\text{H}_{28}\text{F}_3\text{N}_2\text{O}_4$  [ $\text{M}+\text{H}$ ] calculated 441.2001, found 441.1994.

$^1\text{H NMR}$  (**5-min**, 600 MHz,  $\text{CDCl}_3$ )  $\delta$  7.74 (d,  $J = 8.2$  Hz, 2H), 7.47 (d,  $J = 8.3$  Hz, 2H), 3.49 – 3.41 (m, 2H), 3.31 (t,  $J = 6.4$  Hz, 2H), 3.28 (s, 3H), 3.05 (br s, 6H), 2.94 – 2.86 (m, 2H), 2.06 – 1.99 (m, 2H), 1.72 – 1.66 (m, 2H), 1.54 – 1.47 (m, 2H), 1.33 – 1.27 (m, 2H).

$^{13}\text{C NMR}$  (**5-min**, 151 MHz,  $\text{CDCl}_3$ )  $\delta$  178.48, 173.27, 135.20, 130.60 (q,  $J = 32.8$  Hz), 126.60, 126.41 (q,  $J = 3.8$  Hz), 123.79 (q,  $J = 272.3$  Hz), 72.39, 58.74, 56.96, 45.00, 39.77, 38.14, 37.77, 30.05, 22.81.

HRMS (ESI-TOF):  $\text{C}_{22}\text{H}_{28}\text{F}_3\text{N}_2\text{O}_4$  [ $\text{M}+\text{H}$ ] calculated 441.2001, found 441.2005.

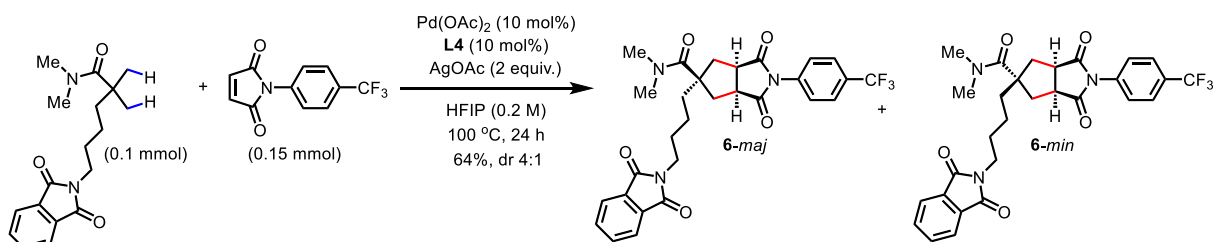

**6-maj** (29.4 mg) and **6-min** (7.7 mg) were isolated separately following the general procedure.

(**6-maj** was isolated as an inseparable mixture with a small amount of *N*-demethylated substrate (1.5 mg), and the accurate yield was calculated accordingly)

$^1\text{H NMR}$  (**6-maj**, 600 MHz,  $\text{CDCl}_3$ )  $\delta$  7.84 (dd,  $J = 5.4, 3.1$  Hz, 2H), 7.72 (dd,  $J = 5.5, 3.0$  Hz, 2H), 7.70 (d,  $J = 8.1$  Hz, 2H), 7.55 (d,  $J = 8.2$  Hz, 2H), 3.68 – 3.63 (m, 2H), 3.39 – 3.35 (m, 2H), 3.22 – 2.99 (m, 5H), 2.74 (br s, 3H), 1.89 (ddd,  $J = 13.7, 7.3, 2.5$  Hz, 2H), 1.83 – 1.79 (m, 2H), 1.68 (p,  $J = 7.4$  Hz, 2H), 1.32 – 1.25 (m, 2H).

$^{13}\text{C NMR}$  (**6-maj**, 151 MHz,  $\text{CDCl}_3$ )  $\delta$  178.52, 173.17, 168.53, 135.70, 134.16, 132.17, 130.35 (q,  $J = 33.0$  Hz), 127.05, 126.11 (q,  $J = 3.8$  Hz), 123.95 (q,  $J = 272.3$  Hz), 123.40, 54.60, 44.91, 40.13, 38.93, 38.07, 38.02, 37.35, 28.76, 23.08.

HRMS (ESI-TOF):  $\text{C}_{29}\text{H}_{29}\text{F}_3\text{N}_3\text{O}_5$  [ $\text{M}+\text{H}$ ] calculated 556.2059, found 556.2063.

$^1\text{H NMR}$  (**6-min**, 600 MHz,  $\text{CDCl}_3$ )  $\delta$  7.83 (dd,  $J = 5.4, 3.0$  Hz, 2H), 7.75 (d,  $J = 8.1$  Hz, 2H), 7.71 (dd,  $J = 5.4, 3.0$  Hz, 2H), 7.47 (d,  $J = 8.3$  Hz, 2H), 3.65 – 3.60 (m, 2H), 3.48 – 3.40 (m, 2H), 3.06 (br s, 6H), 2.94 – 2.87 (m, 2H), 2.00 (dd,  $J = 13.5, 5.2$  Hz, 2H), 1.77 – 1.71 (m, 2H), 1.64 (p,  $J = 7.4$  Hz, 2H), 1.33 – 1.27 (m, 2H).

$^{13}\text{C NMR}$  (**6-min**, 151 MHz,  $\text{CDCl}_3$ )  $\delta$  177.76, 172.43, 167.85, 134.56, 133.54, 131.58, 129.99 (d,  $J = 33.0$  Hz), 126.06, 125.86 (q,  $J = 3.7$  Hz), 123.22 (q,  $J = 272.4$  Hz), 122.78, 56.37, 44.41, 39.16, 37.62, 36.81, 36.74, 28.25, 22.48.

HRMS (ESI-TOF):  $\text{C}_{29}\text{H}_{29}\text{F}_3\text{N}_3\text{O}_5$  [ $\text{M}+\text{H}$ ] calculated 556.2059, found 556.2063.



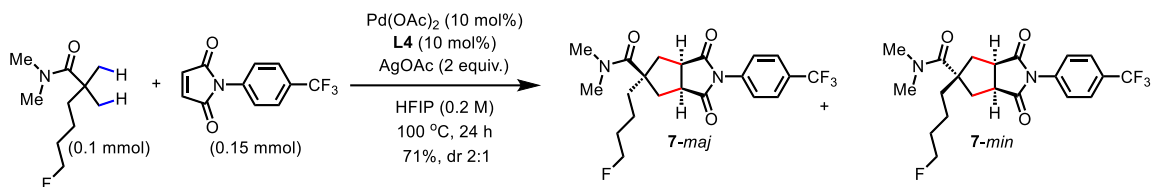

**7-maj** (21.7 mg) and **7-min** (9.0 mg) were isolated separately following the general procedure.

(**7-maj** was isolated as an inseparable mixture with a small amount of *N*-demethylated substrate (0.3 mg), and the accurate yield was calculated accordingly)

<sup>1</sup>H NMR (**7-maj**, 600 MHz, CDCl<sub>3</sub>) δ 7.70 (d, *J* = 8.3 Hz, 2H), 7.56 (d, *J* = 8.2 Hz, 2H), 4.42 (dt, *J* = 47.3, 5.9 Hz, 2H), 3.39 – 3.35 (m, 2H), 3.19 – 2.96 (m, 5H), 2.77 (br s, 3H), 1.89 (ddd, *J* = 13.8, 7.4, 2.5 Hz, 2H), 1.83 – 1.78 (m, 2H), 1.73 – 1.64 (m, 2H), 1.40 – 1.34 (m, 2H).

<sup>13</sup>C NMR (**7-maj**, 151 MHz, CDCl<sub>3</sub>) δ 178.49, 173.27, 135.72, 130.36 (q, *J* = 32.5 Hz), 127.05, 126.12 (q, *J* = 3.7 Hz), 123.94 (q, *J* = 272.3 Hz), 83.77 (d, *J* = 165.1 Hz), 54.69, 44.93, 40.23, 38.81, 38.42, 38.09, 30.61 (d, *J* = 19.7 Hz), 22.23 (d, *J* = 4.8 Hz).

HRMS (ESI-TOF): C<sub>21</sub>H<sub>25</sub>F<sub>4</sub>N<sub>2</sub>O<sub>3</sub> [M+H] calculated 429.1801, found 429.1794.

<sup>1</sup>H NMR (**7-min**, 600 MHz, CDCl<sub>3</sub>) δ 7.74 (d, *J* = 8.4 Hz, 2H), 7.47 (d, *J* = 8.2 Hz, 2H), 4.40 (dt, *J* = 47.3, 5.9 Hz, 2H), 3.49 – 3.43 (m, 2H), 3.06 (br s, 6H), 2.94 – 2.88 (m, 2H), 2.03 (dd, *J* = 13.8, 5.6 Hz, 2H), 1.74 – 1.70 (m, 2H), 1.69 – 1.59 (m, 2H), 1.41 – 1.34 (m, 2H).

<sup>13</sup>C NMR (**7-min**, 151 MHz, CDCl<sub>3</sub>) δ 178.42, 173.11, 135.16, 130.63 (q, *J* = 32.5 Hz), 126.58, 126.42 (q, *J* = 3.6 Hz), 123.79 (q, *J* = 272.2 Hz), 83.72 (d, *J* = 165.6 Hz), 56.93, 44.99, 39.77, 38.14, 37.54, 30.63 (d, *J* = 19.8 Hz), 22.15 (d, *J* = 4.4 Hz).

HRMS (ESI-TOF): C<sub>21</sub>H<sub>25</sub>F<sub>4</sub>N<sub>2</sub>O<sub>3</sub> [M+H] calculated 429.1801, found 429.1797.

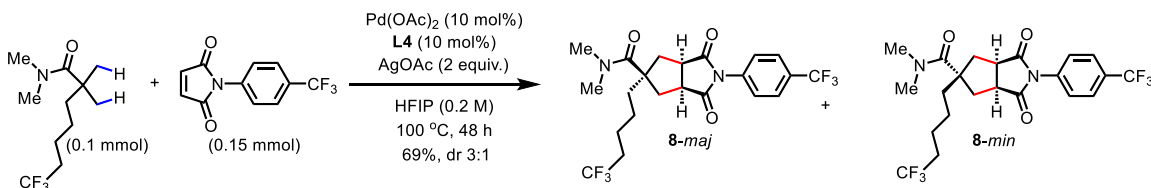

**8-maj** (24.1 mg) and **8-min** (9.2 mg) were isolated separately following the general procedure.

<sup>1</sup>H NMR (**8-maj**, 600 MHz, CDCl<sub>3</sub>) δ 7.70 (d, *J* = 8.2 Hz, 2H), 7.55 (d, *J* = 8.1 Hz, 2H), 3.40 – 3.35 (m, 2H), 3.12 (d, *J* = 13.5 Hz, 2H), 3.09 (br s, 3H), 2.76 (br s, 3H), 2.10 – 2.01 (m, 2H), 1.87 (ddd, *J* = 13.7, 7.3, 2.5 Hz, 2H), 1.79 – 1.75 (m, 2H), 1.54 (p, *J* = 7.9 Hz, 2H), 1.34 – 1.28 (m, 2H).

<sup>13</sup>C NMR (**8-maj**, 151 MHz, CDCl<sub>3</sub>) δ 178.42, 173.10, 135.67, 130.39 (q, *J* = 32.9 Hz), 127.07 (q, *J* = 276.3 Hz), 127.03, 126.13 (q, *J* = 3.8 Hz), 123.94 (q, *J* = 272.3 Hz), 54.55, 44.89, 40.23, 38.80, 38.53, 38.07, 33.63 (q, *J* = 28.6 Hz), 25.38, 22.40 (q, *J* = 3.0 Hz).

HRMS (ESI-TOF): C<sub>22</sub>H<sub>25</sub>F<sub>6</sub>N<sub>2</sub>O<sub>3</sub> [M+H] calculated 479.1769, found 479.1773.

<sup>1</sup>H NMR (**8-min**, 600 MHz, CDCl<sub>3</sub>) δ 7.74 (d, *J* = 8.3 Hz, 2H), 7.46 (d, *J* = 8.3 Hz, 2H), 3.49 – 3.43 (m, 2H), 3.06 (br s, 6H), 2.95 – 2.88 (m, 2H), 2.06 – 1.99 (m, 4H), 1.71 – 1.66 (m, 2H), 1.50 (p, *J* = 7.8 Hz, 2H), 1.35 – 1.29 (m, 2H).

<sup>13</sup>C NMR (**8-min**, 151 MHz, CDCl<sub>3</sub>) δ 178.34, 172.95, 135.11, 130.67 (q, *J* = 33.0 Hz), 127.01 (q, *J* = 276.3 Hz), 126.51, 126.44 (q, *J* = 3.7 Hz), 123.77 (q, *J* = 272.3 Hz), 56.81, 44.94, 39.76, 38.16, 37.56, 33.56 (q, *J* = 28.6 Hz), 25.14, 22.39 (q, *J* = 2.8 Hz).

HRMS (ESI-TOF): C<sub>22</sub>H<sub>25</sub>F<sub>6</sub>N<sub>2</sub>O<sub>3</sub> [M+H] calculated 479.1769, found 479.1766.

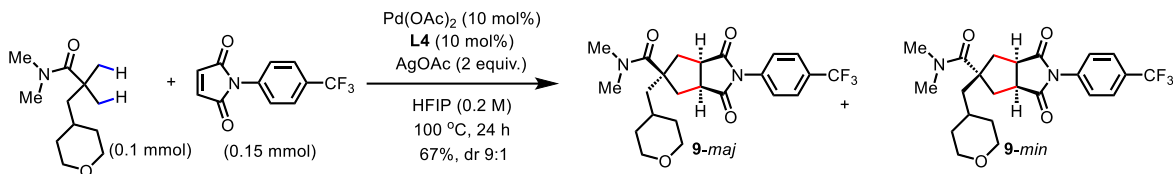

**9-maj** and **9-min** (31.2 mg) were isolated as mixture following the general procedure. Analytical amount of **9-maj** was purified for characterization.

(**9** was isolated as an inseparable mixture with a small amount of *N*-demethylated substrate (1.5 mg), and the accurate yield was calculated accordingly)

<sup>1</sup>H NMR (**9-maj**, 600 MHz, CDCl<sub>3</sub>) δ 7.70 (d, *J* = 8.2 Hz, 2H), 7.56 (d, *J* = 8.0 Hz, 2H), 3.88 (dd, *J* = 11.3, 3.9 Hz, 2H), 3.40 – 3.35 (m, 2H), 3.35 – 3.30 (m, 2H), 3.17 (d, *J* = 13.5 Hz, 2H), 3.10 (br s, 3H), 2.73 br (s, 3H), 1.88 (ddd, *J* = 13.7, 7.4, 2.5 Hz, 2H), 1.75 (d, *J* = 5.8 Hz, 2H), 1.58 – 1.49 (m, 3H), 1.28 – 1.22 (m, 2H).

<sup>13</sup>C NMR (**9-maj**, 151 MHz, CDCl<sub>3</sub>) δ 178.45, 173.72, 135.68, 130.37 (q, *J* = 32.7 Hz), 127.00, 126.11 (q, *J* = 3.8 Hz), 123.93 (q, *J* = 272.0 Hz), 67.92, 53.85, 46.68, 44.89, 41.15, 39.01, 38.02, 33.67, 33.25.

HRMS (ESI-TOF): C<sub>23</sub>H<sub>28</sub>F<sub>3</sub>N<sub>2</sub>O<sub>4</sub> [M+H] calculated 453.2001, found 453.2000.

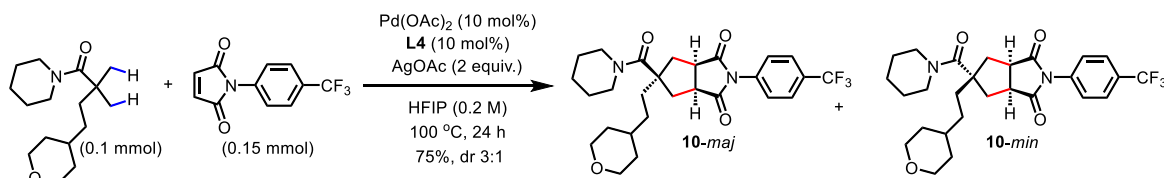

**10-maj** and **10-min** (38.2 mg) were isolated as mixture following the general procedure.

<sup>1</sup>H NMR (**10-maj** + **10-min**, 600 MHz, CDCl<sub>3</sub>) δ 7.74 (d, *J* = 8.5 Hz, 0.5H), 7.70 (d, *J* = 8.5 Hz, 1.5H), 7.55 (d, *J* = 8.3 Hz, 1.5H), 7.47 (d, *J* = 8.3 Hz, 0.5H), 3.96 – 3.90 (m, 2H), 3.59 – 3.28 (m, 8H), 3.09 (d, *J* = 13.2 Hz, 1.5H), 2.92 (dd, *J* = 13.5, 8.4 Hz, 0.5H), 1.96 (dd, *J* = 14.0, 5.6 Hz, 0.5H), 1.86 (ddt, *J* = 15.5, 8.1, 5.8 Hz, 1.5H), 1.77 – 1.62 (m, 3H), 1.61 – 1.48 (m, 5H), 1.45 – 1.32 (m, 2H), 1.29 – 1.18 (m, 5H).

<sup>13</sup>C NMR (**10-maj**, 151 MHz, CDCl<sub>3</sub>) δ 178.52, 171.49, 135.77, 130.32 (q, *J* = 33.0 Hz), 127.01, 126.08 (q, *J* = 3.8 Hz), 123.95 (q, *J* = 272.4 Hz), 68.04, 54.51, 47.97, 44.87, 40.43, 35.93, 35.35, 33.09, 33.07, 25.48, 24.53.

<sup>13</sup>C NMR (**10-min**, 151 MHz, CDCl<sub>3</sub>) δ 178.40, 171.49, 135.16, 130.59 (q, *J* = 33.0 Hz), 126.54, 126.35 (q, *J* = 3.7 Hz), 123.76 (q, *J* = 272.3 Hz), 67.98, 57.04, 46.36, 44.95, 39.82, 35.50, 35.17, 33.28, 33.06, 26.39, 24.62.

HRMS (ESI-TOF): C<sub>27</sub>H<sub>34</sub>F<sub>3</sub>N<sub>2</sub>O<sub>4</sub> [M+H] calculated 507.2471, found 507.2472.

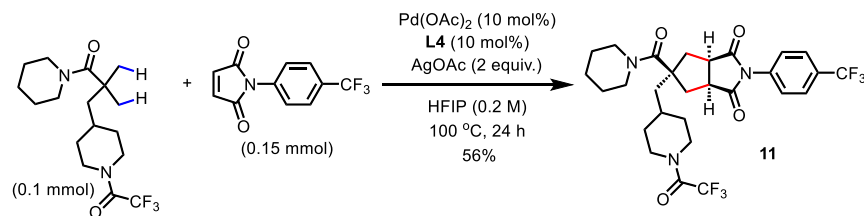

**11-maj** (33.1 mg) was isolated following the general procedure.

<sup>1</sup>H NMR (**11-maj**, 600 MHz, CDCl<sub>3</sub>) δ 7.70 (d, *J* = 8.5 Hz, 2H), 7.55 (d, *J* = 8.3 Hz, 2H), 4.49 (ddt, *J* = 13.5, 4.7, 2.5 Hz, 1H), 3.94 (d, *J* = 14.3 Hz, 1H), 3.62 – 3.29 (m, 4H), 3.41 – 3.36 (m, 2H), 3.16 (br s, 2H), 3.08 – 3.02 (m, 1H), 2.67 (t, *J* = 12.3 Hz, 1H), 1.90 – 1.83 (m, 2H), 1.82 – 1.62 (m, 5H), 1.56 (br s, 4H), 1.24 – 1.09 (m, 4H).

<sup>13</sup>C NMR (**11-maj**, 151 MHz, CDCl<sub>3</sub>) δ 178.34, 171.74, 155.37 (q, *J* = 35.7 Hz), 135.69, 130.43 (q, *J* = 32.9 Hz), 126.93, 126.11 (q, *J* = 3.6 Hz), 123.93 (q, *J* = 272.0 Hz), 116.68 (q, *J* = 288.2 Hz), 53.76, 48.31, 46.24, 46.01 (q, *J* = 3.5 Hz), 44.78, 43.88, 41.22, 34.30, 33.43, 32.45, 25.20, 25.09, 24.43.

HRMS (ESI-TOF): C<sub>28</sub>H<sub>32</sub>F<sub>6</sub>N<sub>3</sub>O<sub>4</sub> [M+H] calculated 588.2297, found 588.2300.

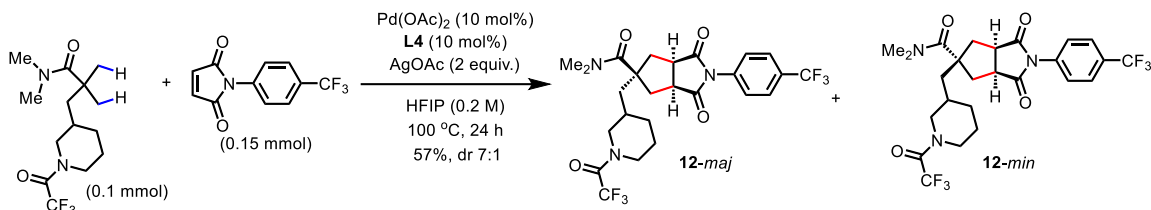

**12-maj** and **12-min** (31.2 mg) were isolated as mixture following the general procedure. Analytical amount of **12-maj** was purified for characterization.

<sup>1</sup>H NMR (**12-maj**, 600 MHz, CDCl<sub>3</sub>) (0.6:0.4 ratio of rotamers) δ 7.70 (d, *J* = 8.5 Hz, 2H), 7.55 (d, *J* = 8.2 Hz, 2H), 4.40 (d, *J* = 13.2 Hz, 0.4H), 4.07 (d, *J* = 12.8 Hz, 0.6H), 3.81 – 3.74 (m, 1H), 3.41 – 3.35 (m, 2H), 3.23 (t, *J* = 15.3 Hz, 1.2H), 3.17 (ddd, *J* = 13.8, 10.8, 3.1 Hz, 0.8H), 3.14 – 2.93 (m, 4H), 2.80 – 2.69 (m, 4H), 2.02 – 1.62 (m, 6H), 1.58 – 1.43 (m, 1.8H), 1.28 – 1.12 (m, 1.2H).

<sup>13</sup>C NMR (**12-maj**, 151 MHz, CDCl<sub>3</sub>) (major rotamer) δ 178.26, 173.05, 155.73 (q, *J* = 35.6 Hz), 135.64, 130.40 (q, *J* = 32.7 Hz), 126.99, 126.12 (q, *J* = 3.6 Hz), 123.92 (q, *J* = 272.3 Hz), 116.67 (q, *J* = 288.0 Hz), 53.83, 49.61, 46.48 (q, *J* = 3.7 Hz), 45.07, 44.53, 42.10, 41.62, 40.11, 38.91, 38.04, 33.71, 30.75, 25.11.

HRMS (ESI-TOF): C<sub>25</sub>H<sub>28</sub>F<sub>6</sub>N<sub>3</sub>O<sub>4</sub> [M+H] calculated 548.1984, found 548.1975.

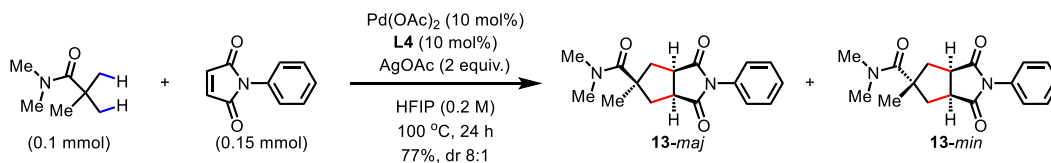

**13-maj** (20.4 mg) and **13-min** (2.7 mg) were isolated separately following the general procedure.

<sup>1</sup>H NMR (**13-maj**, 600 MHz, CDCl<sub>3</sub>) δ 7.47 – 7.41 (m, 2H), 7.38 – 7.33 (m, 3H), 3.39 – 3.32 (m, 2H), 3.03 (d, *J* = 13.6 Hz, 2H), 3.17 – 2.69 (m, 6H), 1.98 – 1.89 (m, 2H), 1.42 (s, 3H).

<sup>13</sup>C NMR (**13-maj**, 151 MHz, CDCl<sub>3</sub>) δ 178.85, 174.31, 132.55, 129.06, 128.50, 126.72, 50.25, 45.09, 41.37, 38.75, 37.87, 24.18.

HRMS (ESI-TOF): C<sub>17</sub>H<sub>21</sub>N<sub>2</sub>O<sub>3</sub> [M+H] calculated 301.1552, found 301.1559.

<sup>1</sup>H NMR (**13-min**, 600 MHz, CDCl<sub>3</sub>) δ 7.50 – 7.46 (m, 2H), 7.40 (ddt, *J* = 8.1, 6.8, 1.3 Hz, 1H), 7.29 – 7.27 (m, 2H), 3.48 – 3.40 (m, 2H), 3.04 (br s, 6H), 2.83 – 2.75 (m, 2H), 2.18 (ddd, *J* = 13.9, 2.6, 1.2 Hz, 2H), 1.37 (s, 3H).

<sup>13</sup>C NMR (**13-min**, 151 MHz, CDCl<sub>3</sub>) δ 179.26, 174.90, 132.12, 129.36, 128.79, 126.34, 51.32, 44.92, 41.24, 38.07, 24.14.

HRMS (ESI-TOF): C<sub>17</sub>H<sub>21</sub>N<sub>2</sub>O<sub>3</sub> [M+H] calculated 301.1552, found 301.1556.

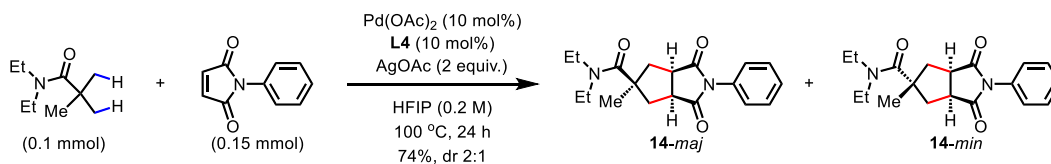

**14-maj** and **14-min** (24.6 mg) were isolated as mixture following the general procedure.

<sup>1</sup>H NMR (**14-maj** + **14-min**, 600 MHz, CDCl<sub>3</sub>) δ 7.50 – 7.46 (m, 0.67H), 7.45 – 7.42 (m, 1.33H), 7.41 – 7.38 (m, 0.33H), 7.38 – 7.36 (m, 1.33H), 7.36 – 7.33 (m, 0.67H), 7.29 – 7.27 (m, 0.67H), 3.48 – 3.18 (m, 6H), 2.96 (d, *J* = 13.6 Hz, 1.33H), 2.82 – 2.73 (m, 0.67H), 2.16 (ddd, *J* = 13.9, 2.4, 1.1 Hz, 0.67H), 2.00 – 1.91 (m, 1.33H), 1.41 (s, 2H), 1.34 (s, 1H), 1.24 – 1.06 (m, 4H), 0.91 (br s, 2H).

<sup>13</sup>C NMR (**14-maj**, 151 MHz, CDCl<sub>3</sub>) δ 178.83, 173.69, 132.58, 129.01, 128.41, 126.69, 50.50, 45.13, 41.97, 41.60,

40.38, 24.80, 13.61, 12.33.

$^{13}\text{C}$  NMR (**14-min**, 151 MHz,  $\text{CDCl}_3$ )  $\delta$  179.32, 174.10, 132.13, 129.34, 128.77, 126.33, 51.49, 44.85, 41.32, 40.95, 24.47, 14.37, 12.70.

HRMS (ESI-TOF):  $\text{C}_{19}\text{H}_{25}\text{N}_2\text{O}_3$  [M+H] calculated 329.1865, found 329.1869.

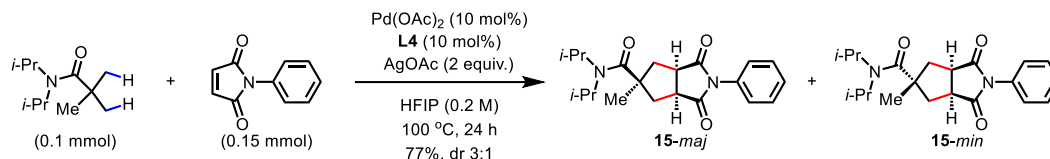

**15-maj** (21.1 mg) and **15-min** (6.5 mg) were isolated separately following the general procedure.

$^1\text{H}$  NMR (**15-maj**, 600 MHz,  $\text{CDCl}_3$ )  $\delta$  7.48 (t,  $J = 7.8$  Hz, 2H), 7.42 – 7.38 (m, 1H), 7.27 (dd,  $J = 9.6, 1.3$  Hz, 2H), 4.16 (hept,  $J = 6.7$  Hz, 1H), 3.45 – 3.40 (m, 2H), 3.33 (hept,  $J = 6.7$  Hz, 1H), 2.79 – 2.71 (m, 2H), 2.16 (dd,  $J = 12.9, 2.5$  Hz, 2H), 1.39 (d,  $J = 6.7$  Hz, 6H), 1.33 (s, 3H), 1.22 (d,  $J = 6.6$  Hz, 6H).

$^{13}\text{C}$  NMR (**15-maj**, 151 MHz,  $\text{CDCl}_3$ )  $\delta$  179.43, 173.63, 132.16, 129.33, 128.75, 126.32, 52.02, 48.59, 46.77, 44.73, 41.19, 24.27, 20.79, 20.62.

HRMS (ESI-TOF):  $\text{C}_{21}\text{H}_{29}\text{N}_2\text{O}_3$  [M+H] calculated 357.2178, found 357.2177.

$^1\text{H}$  NMR (**15-min**, 600 MHz,  $\text{CDCl}_3$ )  $\delta$  7.44 – 7.39 (m, 4H), 7.34 – 7.29 (m, 1H), 4.17 (hept,  $J = 6.2, 5.7$  Hz, 1H), 3.39 – 3.34 (m, 2H), 3.18 (hept,  $J = 6.8$  Hz, 1H), 2.93 (d,  $J = 13.8$  Hz, 2H), 1.95 (ddd,  $J = 14.0, 7.4, 2.5$  Hz, 2H), 1.40 (s, 3H), 1.19 (d,  $J = 6.6$  Hz, 6H), 1.17 (d,  $J = 6.8$  Hz, 6H).

$^{13}\text{C}$  NMR (**15-min**, 151 MHz,  $\text{CDCl}_3$ )  $\delta$  178.86, 173.24, 132.39, 128.76, 128.11, 126.43, 51.35, 48.88, 46.72, 45.12, 41.33, 24.89, 20.68, 20.26.

HRMS (ESI-TOF):  $\text{C}_{21}\text{H}_{29}\text{N}_2\text{O}_3$  [M+H] calculated 357.2178, found 357.2177.

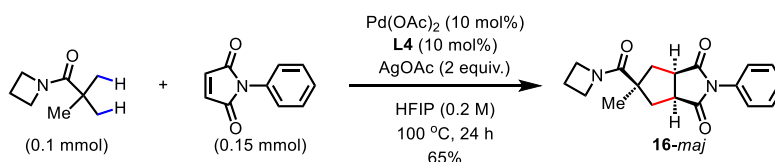

**16-maj** (20.4 mg) was isolated following the general procedure.

$^1\text{H}$  NMR (**16-maj**, 600 MHz,  $\text{CDCl}_3$ )  $\delta$  7.45 (t,  $J = 7.6$  Hz, 2H), 7.38 – 7.35 (m, 1H), 7.34 (dd,  $J = 8.4, 1.2$  Hz, 2H), 4.32 (s, 2H), 3.87 (s, 2H), 3.39 – 3.32 (m, 2H), 2.89 (d,  $J = 13.6$  Hz, 2H), 2.22 – 2.16 (m, 2H), 1.85 (ddd,  $J = 14.1, 7.5, 2.7$  Hz, 2H), 1.32 (s, 3H).

$^{13}\text{C}$  NMR (**16-maj**, 151 MHz,  $\text{CDCl}_3$ )  $\delta$  178.82, 174.28, 132.64, 129.14, 128.62, 126.91, 53.11, 49.77, 49.54, 45.25, 40.00, 23.15, 16.06.

HRMS (ESI-TOF):  $\text{C}_{18}\text{H}_{21}\text{N}_2\text{O}_3$  [M+H] calculated 313.1552, found 313.1560.

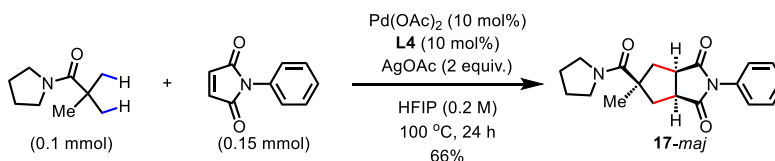

**17-maj** (21.4 mg) was isolated following the general procedure.

$^1\text{H}$  NMR (**17-maj**, 600 MHz,  $\text{CDCl}_3$ )  $\delta$  7.47 – 7.41 (m, 2H), 7.38 – 7.33 (m, 3H), 3.53 (br s, 2H), 3.40 – 3.30 (m, 4H), 2.98 (d,  $J = 13.6$  Hz, 2H), 1.93 (ddt,  $J = 13.4, 8.6, 6.0$  Hz, 2H), 1.87 (br s, 2H), 1.71 (br s, 2H), 1.38 (s, 3H).

$^{13}\text{C}$  NMR (**17-maj**, 151 MHz,  $\text{CDCl}_3$ )  $\delta$  178.88, 173.14, 132.63, 129.09, 128.52, 126.83, 50.83, 48.01, 45.16, 40.59, 27.05, 23.26, 23.07.

HRMS (ESI-TOF):  $\text{C}_{19}\text{H}_{23}\text{N}_2\text{O}_3$  [M+H] calculated 327.1709, found 327.1713.

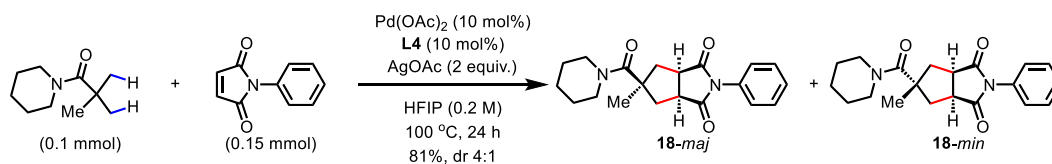

**18-maj** (21.9 mg) and **18-min** (5.7 mg) were isolated separately following the general procedure.

$^1\text{H NMR}$  (**18-maj**, 600 MHz,  $\text{CDCl}_3$ )  $\delta$  7.45 – 7.41 (m, 2H), 7.35 (dd,  $J = 9.0, 7.7$  Hz, 3H), 3.48 (br s, 4H), 3.37 – 3.33 (m, 2H), 3.04 (d,  $J = 13.7$  Hz, 2H), 1.94 – 1.87 (m, 2H), 1.58 – 1.53 (m, 2H), 1.61 – 1.24 (m, 4H), 1.41 (s, 3H).

$^{13}\text{C NMR}$  (**18-maj**, 151 MHz,  $\text{CDCl}_3$ )  $\delta$  178.94, 172.62, 132.67, 129.04, 128.48, 126.73, 50.10, 45.11, 41.65, 25.43, 24.65, 24.55. (–N(CH<sub>2</sub>)– peaks were not found due to weak intensity)

HRMS (ESI-TOF):  $\text{C}_{20}\text{H}_{25}\text{N}_2\text{O}_3$  [M+H] calculated 341.1865, found 341.1865.

$^1\text{H NMR}$  (**18-min**, 600 MHz,  $\text{CDCl}_3$ )  $\delta$  7.50 – 7.46 (m, 2H), 7.41 – 7.38 (m, 1H), 7.29 – 7.27 (m, 2H), 3.56 – 3.52 (m, 4H), 3.46 – 3.41 (m, 2H), 2.84 – 2.78 (m, 2H), 2.13 (ddd,  $J = 13.8, 2.8, 1.2$  Hz, 2H), 1.70 – 1.65 (m, 2H), 1.59 – 1.54 (m, 4H), 1.36 (s, 3H).

$^{13}\text{C NMR}$  (**18-min**, 151 MHz,  $\text{CDCl}_3$ )  $\delta$  179.26, 173.35, 132.12, 129.34, 128.77, 126.37, 51.49, 44.93, 41.36, 26.28, 24.69, 24.46. (–N(CH<sub>2</sub>)– peaks were not found due to weak intensity)

HRMS (ESI-TOF):  $\text{C}_{20}\text{H}_{25}\text{N}_2\text{O}_3$  [M+H] calculated 341.1865, found 341.1865.

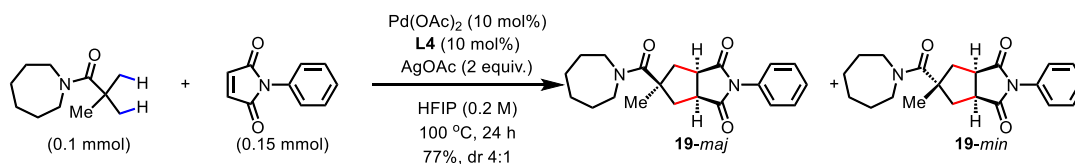

**19-maj** and **19-min** (27.5 mg) were isolated as mixture following the general procedure. Analytical amount of **19-maj** was purified for characterization.

$^1\text{H NMR}$  (**19-maj**, 600 MHz,  $\text{CDCl}_3$ )  $\delta$  7.45 – 7.41 (m, 2H), 7.39 – 7.36 (m, 2H), 7.36 – 7.32 (m, 1H), 3.55 (br s, 2H), 3.40 – 3.33 (m, 2H), 3.33 (br s, 2H), 3.00 (d,  $J = 13.6$  Hz, 2H), 1.99 – 1.92 (m, 2H), 1.75 (br s, 2H), 1.58 – 1.38 (m, 6H), 1.43 (s, 3H).

$^{13}\text{C NMR}$  (**19-maj**, 151 MHz,  $\text{CDCl}_3$ )  $\delta$  178.85, 173.96, 132.55, 128.98, 128.40, 126.70, 50.70, 48.80, 47.79, 45.12, 41.66, 29.77, 28.21, 26.80, 25.49, 24.79.

HRMS (ESI-TOF):  $\text{C}_{21}\text{H}_{27}\text{N}_2\text{O}_3$  [M+H] calculated 355.2022, found 355.2023.

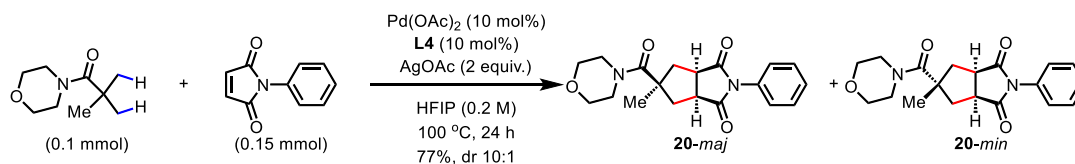

**20-maj** (24.3 mg) and **20-min** (2.5 mg) were isolated separately following the general procedure.

$^1\text{H NMR}$  (**20-maj**, 600 MHz,  $\text{CDCl}_3$ )  $\delta$  7.44 (t,  $J = 7.6$  Hz, 2H), 7.37 – 7.35 (m, 1H), 7.33 (dd,  $J = 8.4, 1.2$  Hz, 2H), 3.55 (br s, 8H), 3.39 – 3.35 (m, 2H), 3.02 (d,  $J = 13.8$  Hz, 2H), 1.96 – 1.89 (m, 2H), 1.41 (s, 3H).

$^{13}\text{C NMR}$  (**20-maj**, 151 MHz,  $\text{CDCl}_3$ )  $\delta$  178.78, 173.12, 132.53, 129.08, 128.57, 126.53, 66.21, 49.96, 45.03, 41.54, 24.32. (–N(CH<sub>2</sub>)– peaks were not found due to weak intensity)

HRMS (ESI-TOF):  $\text{C}_{19}\text{H}_{23}\text{N}_2\text{O}_4$  [M+H] calculated 343.1658, found 343.1659.

$^1\text{H NMR}$  (**20-min**, 600 MHz,  $\text{CDCl}_3$ )  $\delta$  7.50 – 7.46 (m, 2H), 7.42 – 7.39 (m, 1H), 7.29 – 7.27 (m, 2H), 3.70 – 3.61 (m, 8H), 3.48 – 3.42 (m, 2H), 2.83 – 2.76 (m, 2H), 2.17 – 2.13 (m, 2H), 1.36 (s, 3H).

$^{13}\text{C NMR}$  (**20-min**, 151 MHz,  $\text{CDCl}_3$ )  $\delta$  179.06, 173.81, 132.04, 129.38, 128.85, 126.32, 66.94, 51.19, 44.84, 41.22, 24.48. (–N(CH<sub>2</sub>)– peaks were not found due to weak intensity)

HRMS (ESI-TOF): C<sub>19</sub>H<sub>23</sub>N<sub>2</sub>O<sub>4</sub> [M+H] calculated 343.1658, found 343.1660.

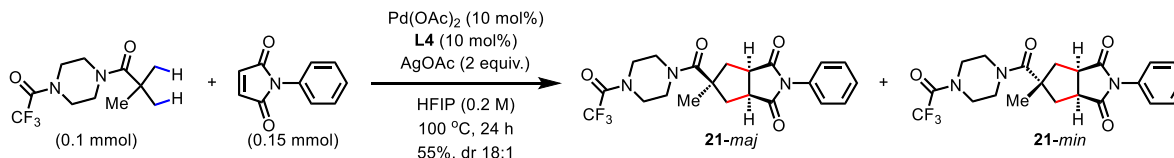

**21-maj** and **21-min** (24.5 mg) were isolated as mixture following the general procedure. Analytical amount of **21-maj** was purified for characterization.

<sup>1</sup>H NMR (**21-maj**, 600 MHz, CDCl<sub>3</sub>) δ 7.45 (t, *J* = 7.7 Hz, 2H), 7.38 (t, *J* = 7.5 Hz, 1H), 7.34 (dd, *J* = 8.4, 1.3 Hz, 2H), 3.81 – 3.19 (m, 8H), 3.41 – 3.37 (m, 2H), 3.04 (d, *J* = 13.6 Hz, 2H), 1.94 (ddt, *J* = 15.8, 8.6, 6.2 Hz, 2H), 1.43 (s, 3H).  
<sup>13</sup>C NMR (**21-maj**, 151 MHz, CDCl<sub>3</sub>) δ 178.83, 173.28, 155.66 (q, *J* = 36.1 Hz), 132.38, 129.18, 128.75, 126.31, 116.35 (q, *J* = 287.9 Hz), 49.96, 44.97, 44.91, 42.39, 41.58, 24.20.

HRMS (ESI-TOF): C<sub>21</sub>H<sub>23</sub>F<sub>3</sub>N<sub>3</sub>O<sub>4</sub> [M+H] calculated 438.1641, found 438.1638.

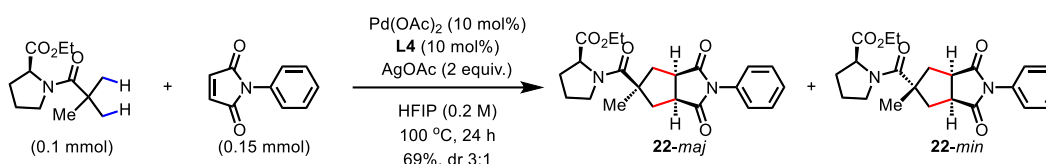

**22-maj** and **22-min** (27.4 mg) were isolated as mixture following the general procedure. Analytical amount of **22-maj** was purified for characterization.

<sup>1</sup>H NMR (**22-maj**, 600 MHz, CDCl<sub>3</sub>) δ 7.46 – 7.43 (m, 2H), 7.38 – 7.33 (m, 3H), 4.25 (dd, *J* = 8.1, 4.3 Hz, 1H), 4.12 – 4.03 (m, 2H), 3.74 – 3.64 (m, 2H), 3.42 – 3.34 (m, 2H), 3.02 (ddd, *J* = 13.5, 3.0, 1.6 Hz, 1H), 2.82 (dt, *J* = 13.9, 2.1 Hz, 1H), 2.06 – 1.99 (m, 3H), 1.96 (dd, *J* = 13.6, 10.0 Hz, 1H), 1.93 – 1.87 (m, 1H), 1.83 – 1.76 (m, 1H), 1.43 (s, 3H), 1.23 (t, *J* = 7.1 Hz, 3H).

<sup>13</sup>C NMR (**22-maj**, 151 MHz, CDCl<sub>3</sub>) δ 178.95, 178.44, 173.81, 172.41, 132.54, 129.12, 128.54, 126.79, 60.97, 60.93, 50.84, 48.45, 45.77, 44.39, 41.69, 39.09, 28.09, 25.73, 23.02, 14.26.

HRMS (ESI-TOF): C<sub>22</sub>H<sub>27</sub>N<sub>2</sub>O<sub>5</sub> [M+H] calculated 399.1920, found 399.1922.

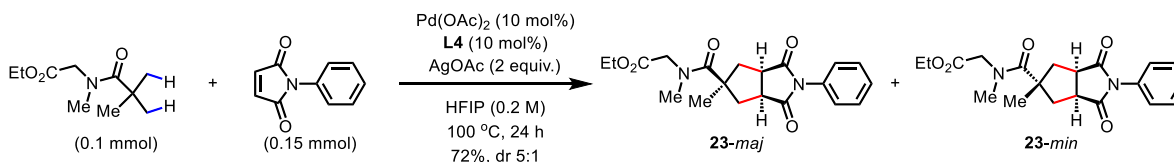

**23-maj** and **23-min** (26.9 mg) were isolated as mixture following the general procedure. Analytical amount of **23-maj** was purified for characterization.

<sup>1</sup>H NMR (**23-maj**, 600 MHz, CDCl<sub>3</sub>) δ 7.46 – 7.42 (m, 2H), 7.37 – 7.33 (m, 1H), 7.32 (d, *J* = 7.2 Hz, 2H), 4.29 – 3.74 (m, 4H), 3.40 – 3.36 (m, 2H), 3.26 – 2.79 (m, 3H), 3.00 (d, *J* = 13.3 Hz, 2H), 2.07 – 1.98 (m, 2H), 1.48 (s, 3H), 1.21 (t, *J* = 7.1 Hz, 3H).

<sup>13</sup>C NMR (**23-maj**, 151 MHz, CDCl<sub>3</sub>) δ 178.57, 175.38, 169.08, 132.48, 129.07, 128.45, 126.57, 61.20, 51.47, 50.32, 45.06, 41.37, 38.29, 24.00, 14.23.

HRMS (ESI-TOF): C<sub>20</sub>H<sub>25</sub>N<sub>2</sub>O<sub>5</sub> [M+H] calculated 373.1763, found 373.1764.

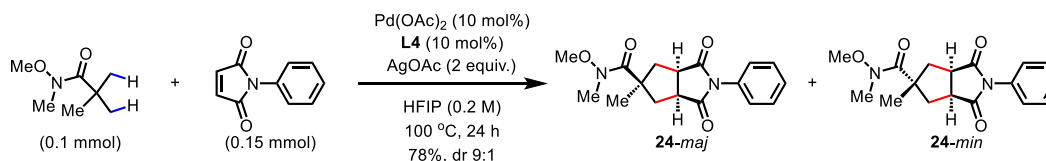



**24-maj** (22.2 mg) and **24-min** (2.5 mg) were isolated separately following the general procedure.

<sup>1</sup>H NMR (**24-maj**, 600 MHz, CDCl<sub>3</sub>) δ 7.46 – 7.42 (m, 2H), 7.38 – 7.34 (m, 1H), 7.31 – 7.28 (m, 2H), 3.70 (s, 3H), 3.39 – 3.35 (m, 2H), 3.09 (s, 3H), 2.94 (d, *J* = 14.1 Hz, 2H), 1.99 – 1.93 (m, 2H), 1.39 (s, 3H).

<sup>13</sup>C NMR (**24-maj**, 151 MHz, CDCl<sub>3</sub>) δ 178.96, 176.14, 132.54, 129.15, 128.57, 126.69, 60.54, 51.25, 45.09, 40.31, 33.72, 22.95.

HRMS (ESI-TOF): C<sub>17</sub>H<sub>21</sub>N<sub>2</sub>O<sub>4</sub> [M+H] calculated 317.1501, found 317.1508.

<sup>1</sup>H NMR (**24-min**, 600 MHz, CDCl<sub>3</sub>) δ 7.48 (t, *J* = 7.8 Hz, 2H), 7.40 (t, *J* = 7.5 Hz, 1H), 7.28 (d, *J* = 7.7 Hz, 2H), 3.72 (s, 3H), 3.45 – 3.39 (m, 2H), 3.20 (s, 3H), 2.73 – 2.64 (m, 2H), 2.24 (dd, *J* = 13.9, 2.3 Hz, 2H), 1.32 (s, 3H).

<sup>13</sup>C NMR (**24-min**, 151 MHz, CDCl<sub>3</sub>) δ 179.47, 176.53, 132.18, 129.35, 128.77, 126.34, 60.97, 51.49, 44.74, 40.06, 33.55, 23.66.

HRMS (ESI-TOF): C<sub>17</sub>H<sub>21</sub>N<sub>2</sub>O<sub>4</sub> [M+H] calculated 317.1501, found 317.1508.

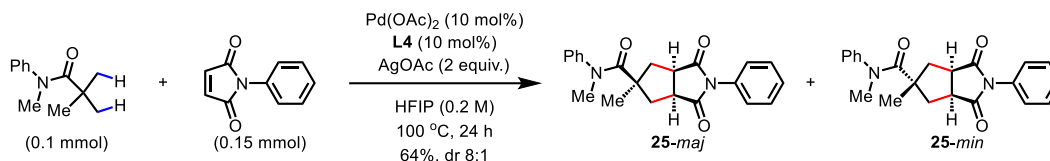

**25-maj** (20.9 mg) and **25-min** (2.8 mg) were isolated separately following the general procedure.

<sup>1</sup>H NMR (**25-maj**, 600 MHz, CDCl<sub>3</sub>) δ 7.45 (t, *J* = 7.6 Hz, 2H), 7.42 – 7.31 (m, 6H), 7.24 (d, *J* = 5.4 Hz, 2H), 3.34 – 3.28 (m, 2H), 3.16 (s, 3H), 2.80 (d, *J* = 13.6 Hz, 2H), 1.75 (dd, *J* = 12.9, 8.3 Hz, 2H), 1.20 (s, 3H).

<sup>13</sup>C NMR (**25-maj**, 151 MHz, CDCl<sub>3</sub>) δ 178.86, 174.91, 144.22, 132.50, 129.55, 129.15, 129.10, 128.57, 128.34, 126.82, 52.55, 45.03, 41.60, 41.35, 25.41.

HRMS (ESI-TOF): C<sub>22</sub>H<sub>23</sub>N<sub>2</sub>O<sub>3</sub> [M+H] calculated 363.1709, found 363.1712.

<sup>1</sup>H NMR (**25-min**, 600 MHz, CDCl<sub>3</sub>) δ 7.45 – 7.41 (m, 4H), 7.39 – 7.34 (m, 2H), 7.23 – 7.18 (m, 4H), 3.36 – 3.31 (m, 2H), 3.24 (s, 3H), 2.60 – 2.53 (m, 2H), 1.84 (d, *J* = 14.0 Hz, 2H), 1.13 (s, 3H).

<sup>13</sup>C NMR (**25-min**, 151 MHz, CDCl<sub>3</sub>) δ 179.35, 175.66, 143.99, 132.11, 129.83, 129.30, 128.72, 128.66, 126.19, 52.35, 44.68, 41.61, 40.96, 26.15.

HRMS (ESI-TOF): C<sub>22</sub>H<sub>23</sub>N<sub>2</sub>O<sub>3</sub> [M+H] calculated 363.1709, found 363.1711.

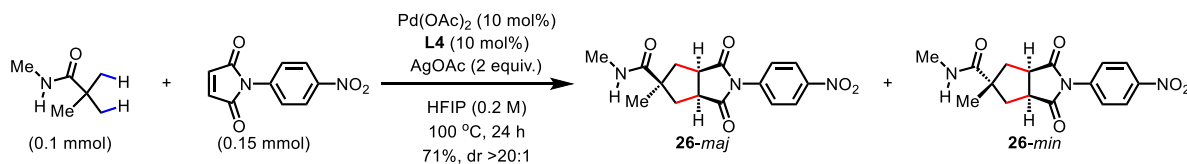

**26-maj** (23.2 mg) and **26-min** (0.9 mg) were isolated separately following the general procedure.

<sup>1</sup>H NMR (**26-maj**, 600 MHz, CDCl<sub>3</sub>) δ 8.32 (d, *J* = 9.0 Hz, 2H), 7.65 (d, *J* = 9.1 Hz, 2H), 5.63 (br s, 1H), 3.48 – 3.43 (m, 2H), 2.75 (d, *J* = 14.0 Hz, 2H), 2.67 (d, *J* = 4.7 Hz, 3H), 2.01 – 1.94 (m, 2H), 1.36 (s, 3H).

<sup>13</sup>C NMR (**26-maj**, 151 MHz, CDCl<sub>3</sub>) δ 178.29, 176.81, 147.15, 138.46, 127.72, 124.36, 50.01, 45.83, 41.43, 26.83, 24.79.

HRMS (ESI-TOF): C<sub>16</sub>H<sub>18</sub>N<sub>3</sub>O<sub>5</sub> [M+H] calculated 332.1246, found 332.1252.

<sup>1</sup>H NMR (**26-min**, 600 MHz, CDCl<sub>3</sub>) δ 8.34 (d, *J* = 9.1 Hz, 2H), 7.59 (d, *J* = 9.1 Hz, 2H), 5.63 (br s, 1H), 3.61 (ddd, *J* = 7.6, 5.1, 2.6 Hz, 2H), 2.85 (d, *J* = 4.8 Hz, 3H), 2.76 – 2.70 (m, 2H), 1.97 (ddd, *J* = 13.9, 3.5, 1.4 Hz, 2H), 1.31 (s, 3H).

<sup>13</sup>C NMR (**26-min**, 151 MHz, CDCl<sub>3</sub>) δ 178.10, 176.03, 147.10, 137.60, 126.83, 124.55, 51.73, 45.79, 41.11, 26.95, 24.18.

HRMS (ESI-TOF): C<sub>16</sub>H<sub>18</sub>N<sub>3</sub>O<sub>5</sub> [M+H] calculated 332.1246, found 332.1251.



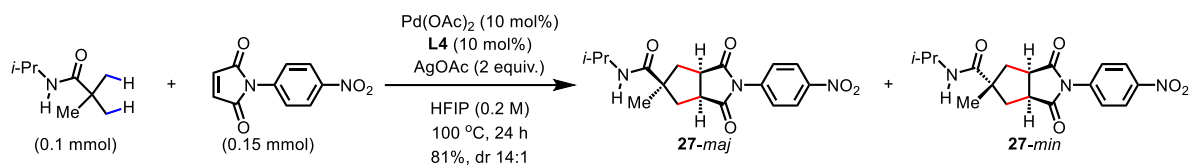

**27-maj** (27.0 mg) and **27-min** (2.0 mg) were isolated separately following the general procedure.

$^1\text{H NMR}$  (**27-maj**, 600 MHz,  $\text{CDCl}_3$ )  $\delta$  8.32 (d,  $J = 9.0$  Hz, 2H), 7.66 (d,  $J = 9.1$  Hz, 2H), 5.34 (d,  $J = 7.8$  Hz, 1H), 3.87 (dp,  $J = 7.8, 6.5$  Hz, 1H), 3.48 – 3.41 (m, 2H), 2.75 (d,  $J = 13.9$  Hz, 2H), 2.00 – 1.91 (m, 2H), 1.34 (s, 3H), 0.99 (d,  $J = 6.6$  Hz, 6H).

$^{13}\text{C NMR}$  (**27-maj**, 151 MHz,  $\text{CDCl}_3$ )  $\delta$  178.22, 175.27, 147.08, 138.50, 127.64, 124.31, 50.02, 45.76, 41.72, 41.29, 24.94, 22.51.

HRMS (ESI-TOF):  $\text{C}_{18}\text{H}_{22}\text{N}_3\text{O}_5$  [M+H] calculated 360.1559, found 360.1565.

$^1\text{H NMR}$  (**27-min**, 600 MHz,  $\text{CDCl}_3$ )  $\delta$  8.34 (d,  $J = 9.1$  Hz, 2H), 7.59 (d,  $J = 9.1$  Hz, 2H), 5.35 (d,  $J = 7.2$  Hz, 1H), 4.07 (dp,  $J = 7.7, 6.5$  Hz, 1H), 3.62 – 3.56 (m, 2H), 2.74 – 2.68 (m, 2H), 1.96 – 1.92 (m, 2H), 1.30 (s, 3H), 1.17 (d,  $J = 6.5$  Hz, 6H).

$^{13}\text{C NMR}$  (**27-min**, 151 MHz,  $\text{CDCl}_3$ )  $\delta$  178.08, 174.50, 147.09, 137.60, 126.84, 124.55, 51.81, 45.75, 41.88, 40.97, 24.23, 22.83.

HRMS (ESI-TOF):  $\text{C}_{18}\text{H}_{22}\text{N}_3\text{O}_5$  [M+H] calculated 360.1559, found 360.1563.

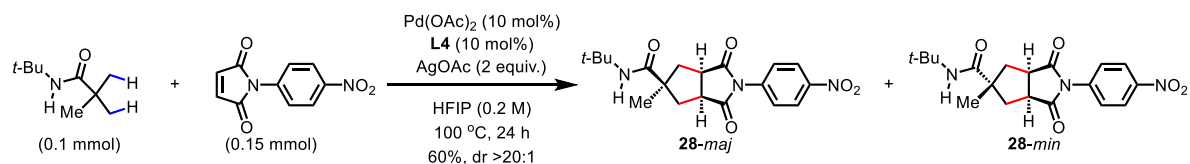

**28-maj** and **28-min** (22.4 mg) were isolated as mixture following the general procedure. Analytical amount of **28-maj** was purified for characterization.

$^1\text{H NMR}$  (**28-maj**, 600 MHz,  $\text{CDCl}_3$ )  $\delta$  8.31 (d,  $J = 9.1$  Hz, 2H), 7.70 (d,  $J = 9.1$  Hz, 2H), 5.30 (s, 1H), 3.46 – 3.41 (m, 2H), 2.73 (d,  $J = 14.0$  Hz, 2H), 1.97 – 1.91 (m, 2H), 1.34 (s, 3H), 1.17 (s, 9H).

$^{13}\text{C NMR}$  (**28-maj**, 151 MHz,  $\text{CDCl}_3$ )  $\delta$  178.25, 175.73, 146.97, 138.50, 127.55, 124.22, 51.34, 50.61, 45.80, 41.35, 28.70, 25.40.

HRMS (ESI-TOF):  $\text{C}_{19}\text{H}_{24}\text{N}_3\text{O}_5$  [M+H] calculated 374.1716, found 374.1716.

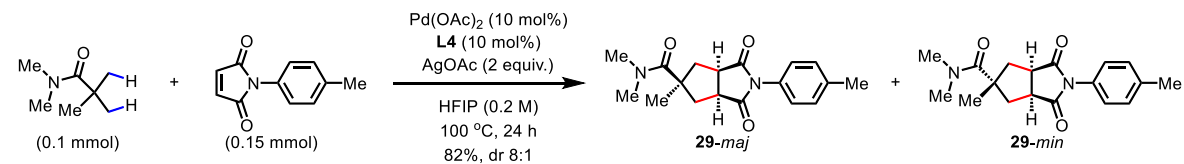

**29-maj** (23.1 mg) and **29-min** (2.8 mg) were isolated separately following the general procedure.

$^1\text{H NMR}$  (**29-maj**, 600 MHz,  $\text{CDCl}_3$ )  $\delta$  7.26 – 7.21 (m, 4H), 3.36 – 3.32 (m, 2H), 3.02 (d,  $J = 13.6$  Hz, 2H), 3.20 – 2.67 (m, 6H), 2.36 (s, 3H), 1.97 – 1.90 (m, 2H), 1.42 (s, 3H).

$^{13}\text{C NMR}$  (**29-maj**, 151 MHz,  $\text{CDCl}_3$ )  $\delta$  178.97, 174.30, 138.49, 129.89, 129.74, 126.50, 50.28, 45.05, 41.32, 38.56, 37.79, 24.18, 21.33.

HRMS (ESI-TOF):  $\text{C}_{18}\text{H}_{23}\text{N}_2\text{O}_3$  [M+H] calculated 315.1709, found 315.1711.

$^1\text{H NMR}$  (**29-min**, 600 MHz,  $\text{CDCl}_3$ )  $\delta$  7.28 (d,  $J = 7.9$  Hz, 2H), 7.15 (d,  $J = 8.3$  Hz, 2H), 3.45 – 3.40 (m, 2H), 3.04 (br s, 6H), 2.82 – 2.75 (m, 2H), 2.38 (s, 3H), 2.19 – 2.15 (m, 2H), 1.36 (s, 3H).

$^{13}\text{C NMR}$  (**29-min**, 151 MHz,  $\text{CDCl}_3$ )  $\delta$  179.42, 174.94, 138.90, 130.01, 129.46, 126.14, 51.29, 44.90, 41.21, 38.11, 24.14, 21.36.

HRMS (ESI-TOF):  $\text{C}_{18}\text{H}_{23}\text{N}_2\text{O}_3$  [M+H] calculated 315.1709, found 315.1715.

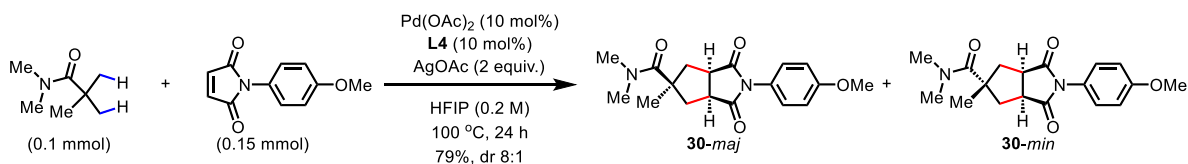

**30-maj** (22.6 mg) and **30-min** (2.7 mg) were isolated separately following the general procedure.

$^1\text{H NMR}$  (**30-maj**, 600 MHz,  $\text{CDCl}_3$ )  $\delta$  7.27 (d,  $J = 9.1$  Hz, 2H), 6.95 (d,  $J = 9.1$  Hz, 2H), 3.81 (s, 3H), 3.37 – 3.30 (m, 2H), 3.02 (d,  $J = 13.6$  Hz, 2H), 3.20 – 2.69 (m, 6H), 1.93 (ddt,  $J = 13.3, 8.6, 6.0$  Hz, 2H), 1.42 (s, 3H).

$^{13}\text{C NMR}$  (**30-maj**, 151 MHz,  $\text{CDCl}_3$ )  $\delta$  179.12, 174.32, 159.50, 127.91, 125.23, 114.42, 55.58, 50.25, 45.02, 41.34, 38.70, 37.81, 24.19.

HRMS (ESI-TOF):  $\text{C}_{18}\text{H}_{23}\text{N}_2\text{O}_4$  [M+H] calculated 331.1658, found 331.1665.

$^1\text{H NMR}$  (**30-min**, 600 MHz,  $\text{CDCl}_3$ )  $\delta$  7.19 (d,  $J = 9.0$  Hz, 2H), 6.98 (d,  $J = 9.0$  Hz, 2H), 3.83 (s, 3H), 3.44 – 3.39 (m, 2H), 3.04 (br s, 6H), 2.81 – 2.75 (m, 2H), 2.17 (ddd,  $J = 13.8, 2.5, 1.0$  Hz, 2H), 1.36 (s, 3H).

$^{13}\text{C NMR}$  (**30-min**, 151 MHz,  $\text{CDCl}_3$ )  $\delta$  179.53, 174.92, 159.67, 127.55, 124.74, 114.69, 55.66, 51.31, 44.86, 41.20, 38.09, 24.13.

HRMS (ESI-TOF):  $\text{C}_{18}\text{H}_{23}\text{N}_2\text{O}_4$  [M+H] calculated 331.1658, found 331.1665.

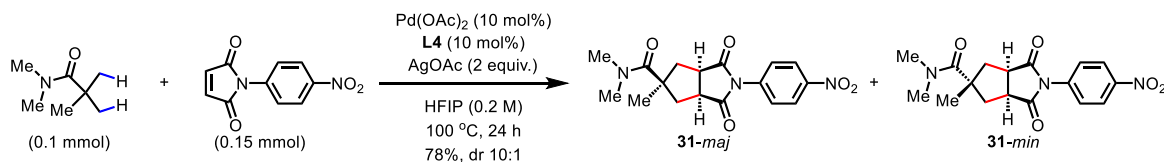

**31-maj** (24.6 mg) and **31-min** (2.5 mg) were isolated separately following the general procedure.

$^1\text{H NMR}$  (**31-maj**, 600 MHz,  $\text{CDCl}_3$ )  $\delta$  8.30 (d,  $J = 9.1$  Hz, 2H), 7.64 (d,  $J = 9.1$  Hz, 2H), 3.42 – 3.37 (m, 2H), 3.07 (d,  $J = 13.8$  Hz, 2H), 3.16 – 2.62 (m, 6H), 1.96 – 1.90 (m, 2H), 1.45 (s, 3H).

$^{13}\text{C NMR}$  (**31-maj**, 151 MHz,  $\text{CDCl}_3$ )  $\delta$  178.14, 174.34, 147.04, 138.18, 127.40, 124.27, 49.99, 45.19, 41.61, 38.96, 37.65, 24.07.

HRMS (ESI-TOF):  $\text{C}_{17}\text{H}_{20}\text{N}_3\text{O}_5$  [M+H] calculated 346.1403, found 346.1403.

$^1\text{H NMR}$  (**31-min**, 600 MHz,  $\text{CDCl}_3$ )  $\delta$  8.34 (d,  $J = 9.0$  Hz, 2H), 7.59 (d,  $J = 9.0$  Hz, 2H), 3.52 – 3.45 (m, 2H), 3.05 (br s, 6H), 2.88 – 2.82 (m, 2H), 2.14 – 2.11 (m, 2H), 1.37 (s, 3H).

$^{13}\text{C NMR}$  (**31-min**, 151 MHz,  $\text{CDCl}_3$ )  $\delta$  178.31, 174.48, 147.10, 137.62, 126.81, 124.56, 51.60, 45.02, 41.35, 38.17, 24.02.

HRMS (ESI-TOF):  $\text{C}_{17}\text{H}_{20}\text{N}_3\text{O}_5$  [M+H] calculated 346.1403, found 346.1404.

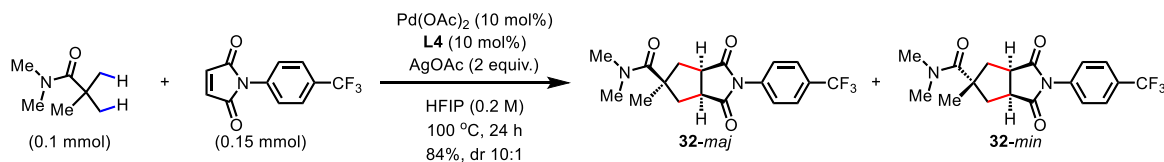

**32-maj** (27.9 mg) and **32-min** (2.9 mg) were isolated separately following the general procedure.

$^1\text{H NMR}$  (**32-maj**, 600 MHz,  $\text{CDCl}_3$ )  $\delta$  7.71 (d,  $J = 8.4$  Hz, 2H), 7.55 (d,  $J = 8.3$  Hz, 2H), 3.41 – 3.34 (m, 2H), 3.06 (d,  $J = 13.6$  Hz, 2H), 3.20 – 2.62 (m, 6H), 1.97 – 1.88 (m, 2H), 1.44 (s, 3H).

$^{13}\text{C NMR}$  (**32-maj**, 151 MHz,  $\text{CDCl}_3$ )  $\delta$  178.45, 174.33, 135.70, 130.36 (q,  $J = 33.0$  Hz), 127.07, 126.14 (q,  $J = 3.8$  Hz), 123.94 (q,  $J = 272.3$  Hz), 50.07, 45.17, 41.51, 38.93, 37.74, 24.14.

HRMS (ESI-TOF):  $\text{C}_{18}\text{H}_{20}\text{F}_3\text{N}_2\text{O}_3$  [M+H] calculated 369.1426, found 369.1429.

$^1\text{H NMR}$  (**32-min**, 600 MHz,  $\text{CDCl}_3$ )  $\delta$  7.75 (d,  $J = 8.1$  Hz, 2H), 7.48 (d,  $J = 8.1$  Hz, 2H), 3.50 – 3.44 (m, 2H), 3.05 (br s, 6H), 2.86 – 2.80 (m, 2H), 2.15 (ddd,  $J = 13.9, 2.8, 1.0$  Hz, 2H), 1.37 (s, 3H).

$^{13}\text{C}$  NMR (**32-min**, 151 MHz,  $\text{CDCl}_3$ )  $\delta$  178.69, 174.64, 135.20, 130.67 (q,  $J = 32.8$  Hz), 126.57, 126.43 (q,  $J = 3.8$  Hz), 123.79 (q,  $J = 272.3$  Hz), 51.49, 44.98, 41.29, 38.12, 24.06.

HRMS (ESI-TOF):  $\text{C}_{18}\text{H}_{20}\text{F}_3\text{N}_2\text{O}_3$  [ $\text{M}+\text{H}$ ] calculated 369.1426, found 369.1434.

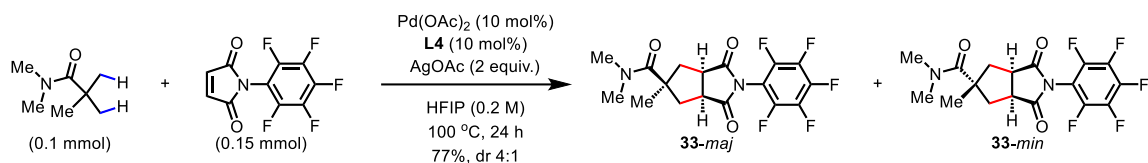

**33-maj** and **33-min** (29.9 mg) were isolated as mixture following the general procedure.

$^1\text{H}$  NMR (**33-maj** + **33-min**, 600 MHz,  $\text{CDCl}_3$ )  $\delta$  3.57 – 3.48 (m, 2H), 3.26 – 2.79 (m, 8H), 2.16 – 2.09 (m, 2H), 1.43 (s, 2.4H), 1.40 (s, 0.6H).

$^{13}\text{C}$  NMR (**33-maj**, 151 MHz,  $\text{CDCl}_3$ )  $\delta$  176.06, 174.03, 143.73 (d,  $J = 256.6$  Hz), 142.04 (d,  $J = 243.4$  Hz), 138.05 (d,  $J = 252.5$  Hz), 107.61, 51.17, 45.57, 41.04, 38.06, 24.10.

$^{13}\text{C}$  NMR (**33-min**, 151 MHz,  $\text{CDCl}_3$ )  $\delta$  176.81, 174.45, 51.81, 45.61, 41.28, 23.92. (– $\text{NMe}_2$  and fluorinated aryl peaks and were not found due to weak intensity)

$^{19}\text{F}$  NMR (**33-maj**, 376 MHz,  $\text{CDCl}_3$ )  $\delta$  -142.03 (ddt,  $J = 593.8, 22.5, 6.4$  Hz), -152.05 (t,  $J = 21.4$  Hz), -161.47 (dtd,  $J = 65.5, 22.0, 6.8$  Hz).

$^{19}\text{F}$  NMR (**33-min**, 376 MHz,  $\text{CDCl}_3$ )  $\delta$  -143.30 (ddt,  $J = 202.5, 22.5, 6.5$  Hz), -151.03 (t,  $J = 21.3$  Hz), -160.87 (dtd,  $J = 111.4, 21.9, 6.9$  Hz).

HRMS (ESI-TOF):  $\text{C}_{17}\text{H}_{16}\text{F}_5\text{N}_2\text{O}_3$  [ $\text{M}+\text{H}$ ] calculated 391.1081, found 391.1078.

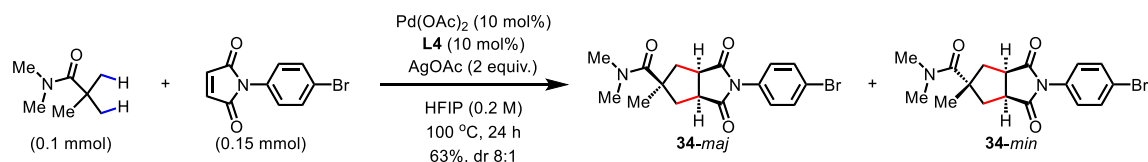

**34-maj** (21.1 mg) and **34-min** (2.8 mg) were isolated separately following the general procedure.

$^1\text{H}$  NMR (**34-maj**, 600 MHz,  $\text{CDCl}_3$ )  $\delta$  7.56 (d,  $J = 8.7$  Hz, 2H), 7.28 (d,  $J = 8.7$  Hz, 2H), 3.38 – 3.31 (m, 2H), 3.04 (d,  $J = 13.7$  Hz, 2H), 3.20 – 2.62 (m, 6H), 1.94 – 1.88 (m, 2H), 1.42 (s, 3H).

$^{13}\text{C}$  NMR (**34-maj**, 151 MHz,  $\text{CDCl}_3$ )  $\delta$  178.56, 174.30, 132.23, 131.57, 128.35, 122.37, 50.10, 45.11, 41.45, 38.82, 37.79, 24.16.

HRMS (ESI-TOF):  $\text{C}_{17}\text{H}_{20}\text{BrN}_2\text{O}_3$  [ $\text{M}+\text{H}$ ] calculated 379.0657, found 379.0664.

$^1\text{H}$  NMR (**34-min**, 600 MHz,  $\text{CDCl}_3$ )  $\delta$  7.60 (d,  $J = 8.6$  Hz, 2H), 7.20 (d,  $J = 8.5$  Hz, 2H), 3.46 – 3.41 (m, 2H), 3.04 (br s, 6H), 2.83 – 2.77 (m, 2H), 2.14 (dd,  $J = 13.4, 3.4$  Hz, 2H), 1.35 (s, 3H).

$^{13}\text{C}$  NMR (**34-min**, 151 MHz,  $\text{CDCl}_3$ )  $\delta$  178.85, 174.72, 132.52, 131.09, 127.83, 122.60, 51.42, 44.93, 41.24, 38.11, 24.07.

HRMS (ESI-TOF):  $\text{C}_{17}\text{H}_{20}\text{BrN}_2\text{O}_3$  [ $\text{M}+\text{H}$ ] calculated 379.0657, found 379.0654.

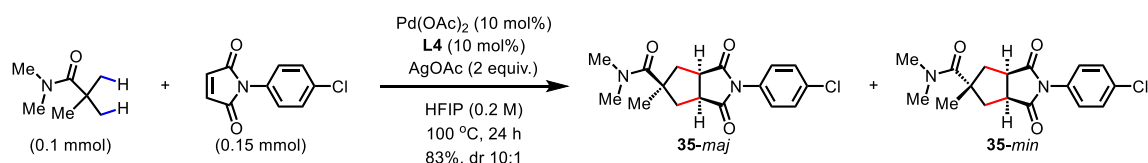

**35-maj** (24.4 mg) and **35-min** (11.0 mg) were isolated separately following the general procedure.

$^1\text{H}$  NMR (**35-maj**, 600 MHz,  $\text{CDCl}_3$ )  $\delta$  7.41 (d,  $J = 8.8$  Hz, 2H), 7.34 (d,  $J = 8.8$  Hz, 2H), 3.37 – 3.32 (m, 2H), 3.04 (d,  $J = 13.6$  Hz, 2H), 3.20 – 2.65 (m, 6H), 1.95 – 1.88 (m, 2H), 1.42 (s, 3H).

$^{13}\text{C}$  NMR (**35-maj**, 151 MHz,  $\text{CDCl}_3$ )  $\delta$  178.63, 174.30, 134.26, 131.05, 129.25, 128.05, 50.11, 45.10, 41.45, 38.83,

37.79, 24.16.

HRMS (ESI-TOF): C<sub>17</sub>H<sub>20</sub>ClN<sub>2</sub>O<sub>3</sub> [M+H] calculated 335.1162, found 335.1161.

<sup>1</sup>H NMR (**35-min**, 600 MHz, CDCl<sub>3</sub>) δ 7.45 (d, *J* = 8.7 Hz, 2H), 7.25 (d, *J* = 8.6 Hz, 2H), 3.46 – 3.41 (m, 2H), 3.04 (br s, 6H), 2.82 – 2.78 (m, 2H), 2.14 (ddd, *J* = 13.8, 2.7, 1.0 Hz, 2H), 1.35 (s, 3H).

<sup>13</sup>C NMR (**35-min**, 151 MHz, CDCl<sub>3</sub>) δ 178.93, 174.73, 134.56, 130.56, 129.54, 127.56, 51.41, 44.92, 41.24, 38.12, 24.08.

HRMS (ESI-TOF): C<sub>17</sub>H<sub>20</sub>ClN<sub>2</sub>O<sub>3</sub> [M+H] calculated 335.1162, found 335.1170.

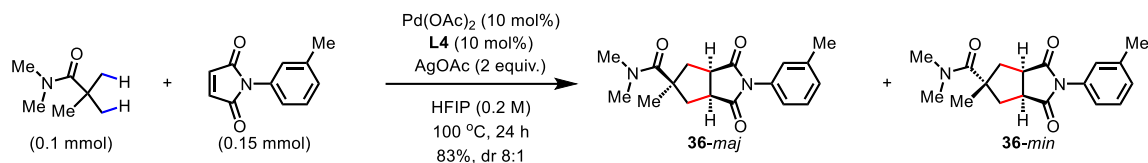

**36-maj** and **36-min** (26.0 mg) were isolated as mixture following the general procedure.

<sup>1</sup>H NMR (**36-maj** + **36-min**, 600 MHz, CDCl<sub>3</sub>) δ 7.36 (t, *J* = 7.8 Hz, 0.11H), 7.34 – 7.31 (m, 0.89H), 7.21 (d, *J* = 7.4 Hz, 0.11H), 7.16 (d, *J* = 8.5 Hz, 0.89H), 7.15 – 7.13 (m, 1.78H), 7.07 – 7.04 (m, 0.22H), 3.45 – 3.40 (m, 0.22H), 3.37 – 3.33 (m, 1.78H), 3.23 – 2.67 (m, 8H), 2.39 (s, 0.33H), 2.37 (s, 2.67H), 2.19 – 2.15 (m, 0.22H), 1.94 (ddt, *J* = 13.4, 8.7, 6.0 Hz, 1.78H), 1.42 (s, 2.67H), 1.37 (s, 0.33H).

<sup>13</sup>C NMR (**36-maj**, 151 MHz, CDCl<sub>3</sub>) δ 178.95, 174.32, 139.07, 132.43, 129.44, 128.92, 127.32, 123.86, 50.30, 45.09, 41.35, 38.65, 37.91, 24.19, 21.47.

<sup>13</sup>C NMR (**36-min**, 151 MHz, CDCl<sub>3</sub>) δ 179.36, 174.91, 139.43, 131.98, 129.69, 129.18, 126.93, 123.46, 51.29, 44.91, 41.20, 24.15, 21.47. (–NMe<sub>2</sub> peaks and were not found due to weak intensity)

HRMS (ESI-TOF): C<sub>18</sub>H<sub>23</sub>N<sub>2</sub>O<sub>3</sub> [M+H] calculated 315.1709, found 315.1714.

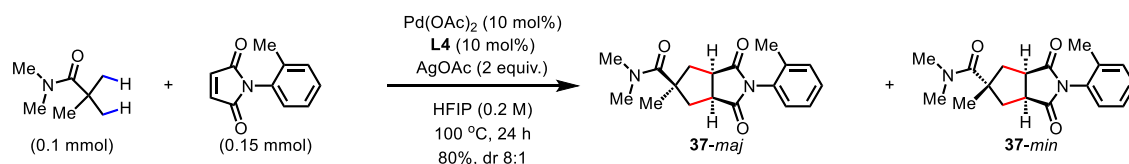

**37-maj** (22.6 mg) and **37-min** (2.7 mg) were isolated separately following the general procedure.

<sup>1</sup>H NMR (**37-maj**, 600 MHz, CDCl<sub>3</sub>) (0.8:0.2 ratio of rotamers) δ 7.44 – 7.40 (m, 0.8H), 7.34 – 7.21 (m, 3H), 7.05 (d, *J* = 7.8 Hz, 0.2H), 3.49 – 3.43 (m, 0.4H), 3.42 – 3.37 (m, 1.6H), 3.25 – 2.79 (m, 7.6H), 2.52 – 2.36 (m, 0.8H), 2.14 (s, 0.6H), 2.11 (s, 2.4H), 1.94 (ddt, *J* = 13.2, 8.5, 6.2 Hz, 1.6H), 1.44 (s, 2.4H), 1.39 (s, 0.6H).

<sup>13</sup>C NMR (**37-maj**, 151 MHz, CDCl<sub>3</sub>) (0.8:0.2 ratio of rotamers) δ 178.75, 178.25, 174.80, 174.39, 136.13, 135.34, 131.69, 131.37, 131.04, 130.88, 129.60, 129.29, 128.16, 128.05, 127.02, 126.88, 52.79, 50.31, 45.28, 44.81, 41.26, 40.41, 38.66, 37.92, 24.27, 23.21, 17.89, 17.81.

HRMS (ESI-TOF): C<sub>18</sub>H<sub>23</sub>N<sub>2</sub>O<sub>3</sub> [M+H] calculated 315.1709, found 315.1713.

<sup>1</sup>H NMR (**37-min**, 600 MHz, CDCl<sub>3</sub>) (0.6:0.4 ratio of rotamers) δ 7.36 – 7.28 (m, 3H), 7.07 (d, *J* = 7.8 Hz, 0.4H), 7.02 (d, *J* = 7.7 Hz, 0.6H), 3.51 – 3.43 (m, 2H), 3.05 (br s, 6H), 3.01 – 2.96 (m, 0.8H), 2.82 – 2.76 (m, 1.2H), 2.20 (ddd, *J* = 13.8, 2.5, 1.2 Hz, 1.2H), 2.17 (s, 1.2H), 2.15 (s, 1.8H), 1.90 – 1.84 (m, 0.8H), 1.47 (s, 1.2H), 1.41 (s, 1.8H).

<sup>13</sup>C NMR (**37-min**, 151 MHz, CDCl<sub>3</sub>) (0.6:0.4 ratio of rotamers) δ 178.72, 174.92, 174.29, 135.81, 135.66, 131.44, 131.38, 131.20, 131.06, 129.68, 129.66, 128.36, 127.31, 127.26, 127.03, 52.76, 51.35, 45.79, 45.11, 41.72, 41.13, 38.13, 24.27, 17.94, 17.88.

HRMS (ESI-TOF): C<sub>18</sub>H<sub>23</sub>N<sub>2</sub>O<sub>3</sub> [M+H] calculated 315.1709, found 315.1715.

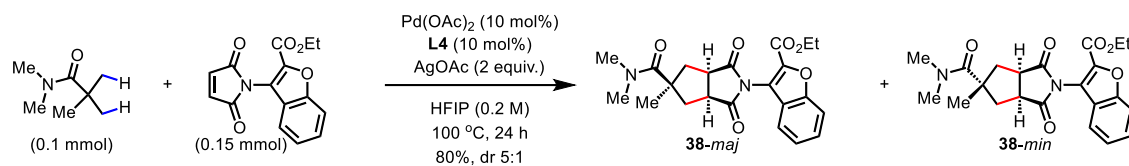

**38-maj** and **38-min** (33.0 mg) were isolated as mixture following the general procedure.

$^1\text{H NMR}$  (**38-maj** + **38-min**, 600 MHz,  $\text{CDCl}_3$ )  $\delta$  8.18 (s, 1H), 7.63 – 7.55 (m, 1H), 7.52 – 7.45 (m, 1H), 7.35 (ddd,  $J$  = 8.0, 7.1, 0.9 Hz, 1H), 4.43 – 4.35 (m, 2H), 3.55 (ddt,  $J$  = 7.9, 6.0, 2.6 Hz, 0.33H), 3.48 (d,  $J$  = 6.8 Hz, 1.67H), 3.23 – 2.63 (m, 8H), 2.33 – 1.80 (m, 2H), 1.50 (s, 0.5H), 1.45 (s, 2.5H), 1.41 – 1.36 (m, 3H).

$^{13}\text{C NMR}$  (**38-maj**, 151 MHz,  $\text{CDCl}_3$ )  $\delta$  177.24, 174.50, 158.46, 154.08, 139.52, 128.51, 124.30, 124.14, 123.49, 120.72, 112.44, 61.75, 50.42, 45.68, 40.82, 38.73, 38.00, 24.11, 14.41.

HRMS (ESI-TOF):  $\text{C}_{22}\text{H}_{25}\text{N}_2\text{O}_6$  [ $\text{M}+\text{H}$ ] calculated 413.1713, found 413.1712.

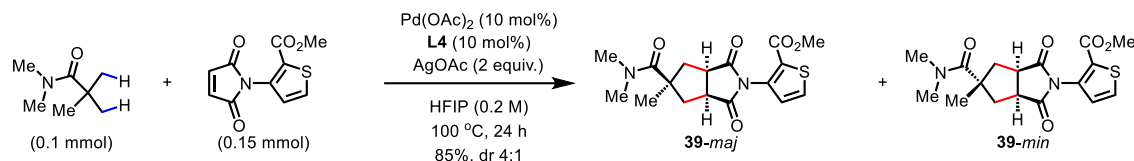

**39-maj** and **39-min** (30.8 mg) were isolated as mixture following the general procedure.

$^1\text{H NMR}$  (**39-maj** + **39-min**, 600 MHz,  $\text{CDCl}_3$ )  $\delta$  7.58 (d,  $J$  = 5.3 Hz, 0.2H), 7.55 (d,  $J$  = 5.3 Hz, 0.8H), 7.24 (d,  $J$  = 5.3 Hz, 0.8H), 7.02 (d,  $J$  = 5.3 Hz, 0.2H), 3.83 (s, 0.6H), 3.80 (s, 2.4H), 3.48 – 3.44 (m, 0.4H), 3.43 – 3.39 (m, 1.6H), 3.22 – 2.68 (m, 8H), 2.09 (dd,  $J$  = 13.3, 5.2 Hz, 0.4H), 2.00 – 1.95 (m, 1.6H), 1.45 (s, 0.6H), 1.42 (s, 2.4H).

$^{13}\text{C NMR}$  (**39-maj**, 151 MHz,  $\text{CDCl}_3$ )  $\delta$  177.81, 174.50, 160.81, 134.77, 130.25, 127.77, 126.81, 52.25, 50.62, 45.27, 40.93, 38.55, 38.02, 23.91.

$^{13}\text{C NMR}$  (**39-min**, 151 MHz,  $\text{CDCl}_3$ )  $\delta$  178.05, 174.69, 160.64, 134.31, 130.55, 127.49, 127.02, 52.44, 52.31, 45.59, 40.80, 23.84. (– $\text{NMe}_2$  peaks and were not found due to weak intensity)

HRMS (ESI-TOF):  $\text{C}_{17}\text{H}_{21}\text{N}_2\text{O}_5\text{S}$  [ $\text{M}+\text{H}$ ] calculated 365.1171, found 365.1166.

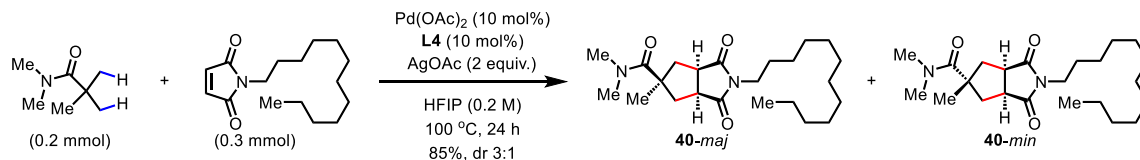

**40-maj** and **40-min** (66.5 mg) were isolated as mixture following the general procedure.

$^1\text{H NMR}$  (**40-maj** + **40-min**, 600 MHz,  $\text{CDCl}_3$ )  $\delta$  3.48 – 3.43 (m, 0.5H), 3.38 – 3.32 (m, 1.5H), 3.27 – 3.21 (m, 0.5H), 3.20 – 3.15 (m, 1.5H), 3.14 – 2.79 (m, 6H), 2.75 (d,  $J$  = 14.0 Hz, 1.5H), 2.73 – 2.67 (m, 0.5H), 2.00 (dd,  $J$  = 13.5, 3.4 Hz, 0.5H), 1.97 – 1.90 (m, 1.5H), 1.57 – 1.47 (m, 2H), 1.36 (s, 3H), 1.32 – 1.22 (m, 18H), 0.88 (t,  $J$  = 7.0 Hz, 3H).

$^{13}\text{C NMR}$  (**40-maj** + **40-min**, 151 MHz,  $\text{CDCl}_3$ )  $\delta$  180.24, 179.67, 174.94, 174.28, 51.45, 50.74, 44.81, 44.72, 40.81, 40.74, 39.14, 39.08, 38.07, 32.01, 29.73, 29.72, 29.67, 29.67, 29.64, 29.61, 29.58, 29.44, 29.29, 29.24, 27.62, 27.58, 27.08, 27.08, 27.01, 24.05, 23.96, 22.79, 14.22.

HRMS (ESI-TOF):  $\text{C}_{23}\text{H}_{41}\text{N}_2\text{O}_3$  [ $\text{M}+\text{H}$ ] calculated 393.3117, found 393.3119.

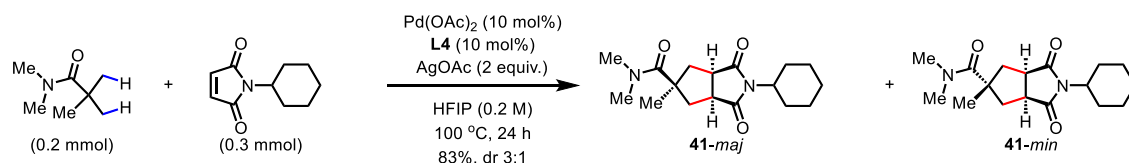

**41-maj** and **41-min** (50.6 mg) were isolated as mixture following the general procedure.

$^1\text{H NMR}$  (**41-maj** + **41-min**, 600 MHz,  $\text{CDCl}_3$ )  $\delta$  3.94 (tt,  $J$  = 12.3, 3.9 Hz, 0.25H), 3.87 (tt,  $J$  = 12.3, 3.9 Hz, 0.75H),

3.20 – 3.15 (m, 0.5H), 3.14 – 3.09 (m, 1.5H), 3.22 – 2.77 (m, 6H), 2.74 (ddd,  $J = 13.8, 1.9, 0.9$  Hz, 1.5H), 2.68 – 2.61 (m, 0.5H), 2.13 (qd,  $J = 12.4, 3.4$  Hz, 0.5H), 2.10 – 2.01 (m, 2H), 1.97 – 1.90 (m, 1.5H), 1.82 – 1.76 (m, 2H), 1.68 – 1.55 (m, 3H), 1.36 (s, 2.25H), 1.32 – 1.15 (m, 3H), 1.23 (s, 0.75H).

$^{13}\text{C}$  NMR (**41-maj**, 151 MHz,  $\text{CDCl}_3$ )  $\delta$  179.74, 174.29, 51.73, 50.62, 44.51, 40.80, 38.04, 28.53, 25.93, 25.20, 24.23.

$^{13}\text{C}$  NMR (**41-min**, 151 MHz,  $\text{CDCl}_3$ )  $\delta$  180.50, 175.19, 51.76, 50.90, 44.37, 40.86, 28.50, 25.86, 25.11, 24.21. (– $\text{NMe}_2$  peaks were not found due to weak intensity)

HRMS (ESI-TOF):  $\text{C}_{17}\text{H}_{27}\text{N}_2\text{O}_3$  [ $\text{M}+\text{H}$ ] calculated 307.2022, found 307.2026.

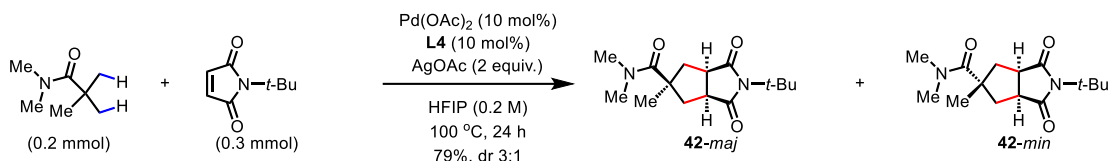

**42-maj** and **42-min** (44.6 mg) were isolated as mixture following the general procedure.

$^1\text{H}$  NMR (**42-maj** + **42-min**, 600 MHz,  $\text{CDCl}_3$ )  $\delta$  3.17 – 2.83 (m, 8H), 2.73 (ddd,  $J = 13.8, 1.9, 1.0$  Hz, 1.5H), 2.59 (ddd,  $J = 13.9, 7.3, 2.3$  Hz, 0.5H), 2.12 (ddd,  $J = 14.1, 1.8, 1.0$  Hz, 0.5H), 1.95 – 1.88 (m, 1.5H), 1.57 (s, 2.25H), 1.53 (s, 6.75H), 1.35 (s, 2.25H), 1.22 (s, 0.75H).

$^{13}\text{C}$  NMR (**42-maj**, 151 MHz,  $\text{CDCl}_3$ )  $\delta$  180.66, 174.46, 58.11, 50.43, 44.73, 41.09, 38.02, 28.25, 24.25.

$^{13}\text{C}$  NMR (**42-min**, 151 MHz,  $\text{CDCl}_3$ )  $\delta$  181.48, 175.37, 58.23, 50.46, 44.49, 41.01, 28.16, 24.04. (– $\text{NMe}_2$  peaks were not found due to weak intensity)

HRMS (ESI-TOF):  $\text{C}_{15}\text{H}_{25}\text{N}_2\text{O}_3$  [ $\text{M}+\text{H}$ ] calculated 281.1865, found 281.1864.

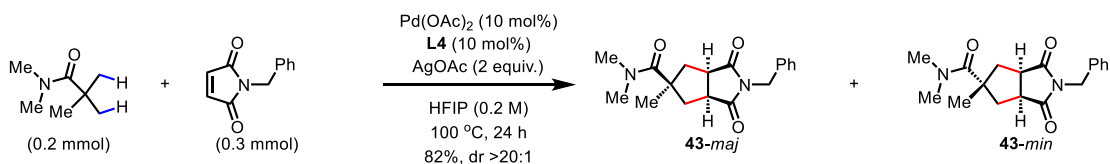

**43-maj** and **43-min** (51.8 mg) were isolated as mixture following the general procedure.

$^1\text{H}$  NMR (**43-maj**, 600 MHz,  $\text{CDCl}_3$ )  $\delta$  7.39 – 7.37 (m, 2H), 7.29 (t,  $J = 7.2$  Hz, 2H), 7.26 – 7.23 (m, 1H), 4.52 (s, 2H), 3.21 – 3.16 (m, 2H), 3.27 – 2.57 (m, 6H), 2.77 – 2.72 (m, 2H), 1.96 – 1.90 (m, 2H), 1.35 (s, 3H).

$^{13}\text{C}$  NMR (**43-maj**, 151 MHz,  $\text{CDCl}_3$ )  $\delta$  179.28, 174.25, 136.02, 129.11, 128.62, 127.84, 50.77, 44.77, 42.61, 40.68, 38.35, 37.91, 23.80.

HRMS (ESI-TOF):  $\text{C}_{18}\text{H}_{23}\text{N}_2\text{O}_3$  [ $\text{M}+\text{H}$ ] calculated 315.1709, found 315.1714.

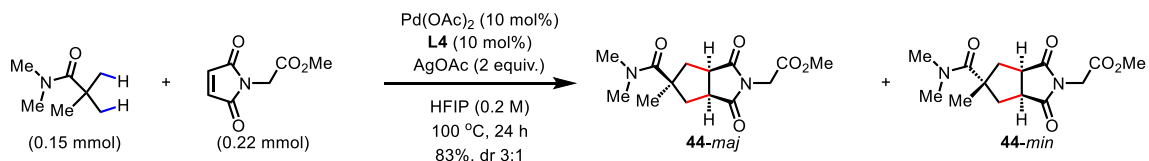

**44-maj** and **44-min** (36.9 mg) were isolated as mixture following the general procedure.

$^1\text{H}$  NMR (**44-maj** + **44-min**, 600 MHz,  $\text{CDCl}_3$ )  $\delta$  4.23 (s, 0.5H), 4.14 (s, 1.5H), 3.76 (s, 0.75H), 3.73 (s, 2.25H), 3.38 – 3.29 (m, 2H), 3.22 – 2.70 (m, 8H), 2.03 – 1.95 (m, 2H), 1.37 (s, 0.75H), 1.37 (s, 2.25H).

$^{13}\text{C}$  NMR (**44-maj**, 151 MHz,  $\text{CDCl}_3$ )  $\delta$  178.69, 174.38, 167.53, 52.65, 50.97, 44.83, 40.63, 39.56, 38.08, 23.69.

$^{13}\text{C}$  NMR (**44-min**, 151 MHz,  $\text{CDCl}_3$ )  $\delta$  179.16, 174.86, 167.38, 52.74, 51.87, 45.17, 40.73, 39.49, 23.89. (– $\text{NMe}_2$  peaks were not found due to weak intensity)

HRMS (ESI-TOF):  $\text{C}_{14}\text{H}_{21}\text{N}_2\text{O}_5$  [ $\text{M}+\text{H}$ ] calculated 297.1450, found 297.1456.



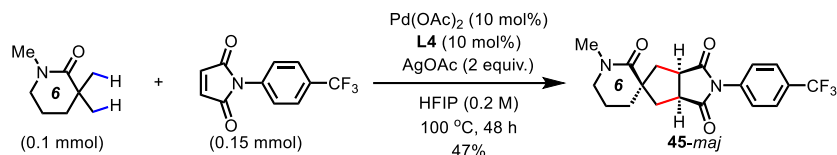

**45-maj** (24.4 mg) was isolated following the general procedure.

$^1\text{H NMR}$  (**45-maj**, 600 MHz,  $\text{CDCl}_3$ )  $\delta$  7.72 (d,  $J = 8.5$  Hz, 2H), 7.62 (d,  $J = 8.3$  Hz, 2H), 3.50 – 3.46 (m, 2H), 3.28 (t,  $J = 5.8$  Hz, 2H), 2.84 (s, 3H), 2.68 (d,  $J = 14.2$  Hz, 2H), 1.94 (ddd,  $J = 14.4, 8.0, 2.6$  Hz, 2H), 1.88 – 1.81 (m, 4H).

$^{13}\text{C NMR}$  (**45-maj**, 151 MHz,  $\text{CDCl}_3$ )  $\delta$  179.22, 174.72, 136.55, 130.28 (q,  $J = 32.5$  Hz), 127.83, 126.18 (q,  $J = 3.8$  Hz), 124.06 (q,  $J = 272.3$  Hz), 50.24, 49.62, 46.24, 41.52, 35.67, 34.90, 21.17.

HRMS (ESI-TOF):  $\text{C}_{19}\text{H}_{20}\text{F}_3\text{N}_2\text{O}_3$  [ $\text{M}+\text{H}$ ] calculated 381.1426, found 381.1417.

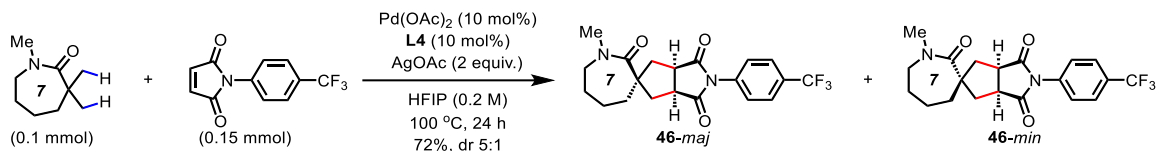

**46-maj** (24.7 mg) and **46-min** (4.9 mg) were isolated separately following the general procedure.

$^1\text{H NMR}$  (**46-maj**, 600 MHz,  $\text{CDCl}_3$ )  $\delta$  7.70 (d,  $J = 8.4$  Hz, 2H), 7.56 (d,  $J = 8.2$  Hz, 2H), 3.45 – 3.37 (m, 4H), 3.02 (d,  $J = 13.7$  Hz, 2H), 2.87 (s, 3H), 1.92 (ddd,  $J = 13.8, 7.5, 2.5$  Hz, 2H), 1.78 – 1.69 (m, 4H), 1.65 – 1.60 (m, 2H).

$^{13}\text{C NMR}$  (**46-maj**, 151 MHz,  $\text{CDCl}_3$ )  $\delta$  178.72, 175.91, 135.98, 130.30 (q,  $J = 32.5$  Hz), 127.25, 126.13 (q,  $J = 3.8$  Hz), 123.99 (q,  $J = 272.4$  Hz), 54.52, 51.17, 45.41, 40.70, 39.07, 36.21, 27.80, 26.29.

HRMS (ESI-TOF):  $\text{C}_{20}\text{H}_{22}\text{F}_3\text{N}_2\text{O}_3$  [ $\text{M}+\text{H}$ ] calculated 395.1583, found 395.1584.

$^1\text{H NMR}$  (**46-min**, 600 MHz,  $\text{CDCl}_3$ )  $\delta$  7.74 (d,  $J = 8.3$  Hz, 2H), 7.45 (d,  $J = 8.2$  Hz, 2H), 3.55 – 3.49 (m, 2H), 3.44 (dd,  $J = 6.2, 3.7$  Hz, 2H), 3.02 (s, 3H), 2.90 – 2.83 (m, 2H), 2.08 (dd,  $J = 13.5, 3.6$  Hz, 2H), 1.76 – 1.70 (m, 2H), 1.68 – 1.61 (m, 4H).

$^{13}\text{C NMR}$  (**46-min**, 151 MHz,  $\text{CDCl}_3$ )  $\delta$  178.67, 175.39, 135.22, 130.62 (q,  $J = 32.9$  Hz), 126.62, 126.42 (q,  $J = 3.7$  Hz), 123.80 (q,  $J = 272.4$  Hz), 56.22, 50.54, 45.24, 39.70, 38.64, 34.95, 27.42, 25.53.

HRMS (ESI-TOF):  $\text{C}_{20}\text{H}_{22}\text{F}_3\text{N}_2\text{O}_3$  [ $\text{M}+\text{H}$ ] calculated 395.1583, found 395.1577.

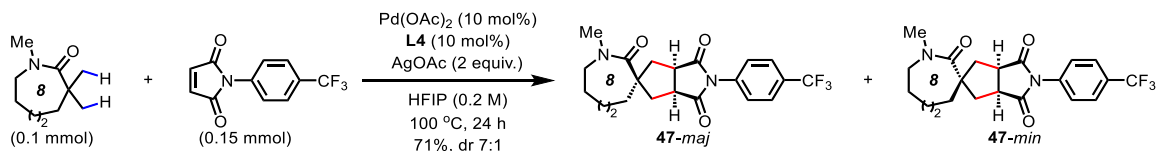

**47-maj** (26.6 mg) and **47-min** (3.6 mg) were isolated separately following the general procedure.

$^1\text{H NMR}$  (**47-maj**, 600 MHz,  $\text{CDCl}_3$ )  $\delta$  7.71 (d,  $J = 8.1$  Hz, 2H), 7.57 (d,  $J = 8.4$  Hz, 2H), 3.58 (br s, 2H), 3.44 – 3.39 (m, 2H), 2.95 (br s, 2H), 2.77 (s, 3H), 2.04 – 1.93 (m, 4H), 1.71 (s, 2H), 1.67 – 1.59 (m, 2H), 1.39 (s, 2H).

$^{13}\text{C NMR}$  (**47-maj**, 151 MHz,  $\text{CDCl}_3$ )  $\delta$  178.78, 177.27, 136.04, 130.27 (q,  $J = 32.5$  Hz), 127.25, 126.15 (q,  $J = 3.8$  Hz), 123.99 (q,  $J = 272.2$  Hz), 54.73, 48.00, 45.64, 42.36, 41.55, 36.57, 26.13, 24.37, 20.72.

HRMS (ESI-TOF):  $\text{C}_{21}\text{H}_{24}\text{F}_3\text{N}_2\text{O}_3$  [ $\text{M}+\text{H}$ ] calculated 409.1739, found 409.1729.

$^1\text{H NMR}$  (**47-min**, 600 MHz,  $\text{CDCl}_3$ )  $\delta$  7.74 (d,  $J = 8.4$  Hz, 2H), 7.44 (d,  $J = 8.3$  Hz, 2H), 3.58 (br s, 2H), 3.52 – 3.47 (m, 2H), 2.89 (s, 3H), 2.81 (br s, 2H), 2.23 (d,  $J = 12.7$  Hz, 2H), 1.80 (t,  $J = 6.1$  Hz, 2H), 1.71 (br s, 2H), 1.59 (br s, 2H), 1.40 (br s, 2H).

$^{13}\text{C NMR}$  (**47-min**, 151 MHz,  $\text{CDCl}_3$ )  $\delta$  178.87, 176.62, 135.25, 130.62 (q,  $J = 32.8$  Hz), 126.55, 126.43 (q,  $J = 3.8$  Hz), 123.79 (q,  $J = 272.4$  Hz), 56.06, 47.23, 45.20, 41.25, 40.81, 35.90, 26.84, 23.47, 21.89.

HRMS (ESI-TOF):  $\text{C}_{21}\text{H}_{24}\text{F}_3\text{N}_2\text{O}_3$  [ $\text{M}+\text{H}$ ] calculated 409.1739, found 409.1737.



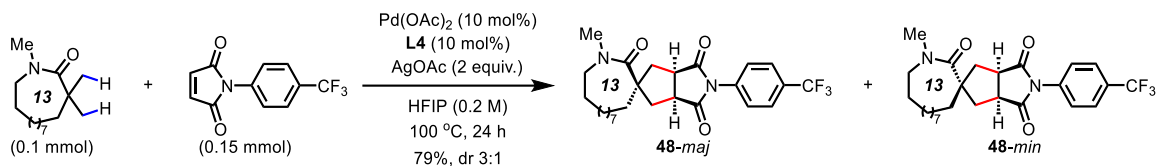

**48-maj** and **48-min** (37.8 mg) were isolated as mixture following the general procedure. Analytical amount of **48-maj** was purified for characterization.

$^1\text{H}$  NMR (**48-maj**, 600 MHz,  $\text{CDCl}_3$ ) (0.6:0.4 ratio of rotamers)  $\delta$  7.70 (d,  $J = 8.5$  Hz, 2H), 7.61 – 7.49 (m, 2H), 4.27 – 4.22 (m, 0.8H), 3.48 – 3.37 (m, 1.2H), 3.36 – 3.25 (m, 2H), 3.23 – 3.04 (m, 2.8H), 2.99 (d,  $J = 13.6$  Hz, 0.8H), 2.65 – 2.24 (m, 1.2H), 2.05 – 1.61 (m, 4.2H), 1.48 – 1.14 (m, 16H).

$^{13}\text{C}$  NMR (**48-maj**, 151 MHz,  $\text{CDCl}_3$ ) (0.6:0.4 ratio of rotamers)  $\delta$  178.86, 178.37, 173.56, 135.69, 130.32 (q,  $J = 32.5$  Hz), 127.01, 126.11, 123.96 (q,  $J = 272.3$  Hz), 55.45, 48.71, 48.10, 46.04, 44.87, 43.79, 41.71, 40.15, 38.64, 38.25, 37.81, 36.89, 32.91, 27.71, 27.59, 26.99, 26.83, 26.33, 26.09, 25.58, 25.26, 25.19, 24.82, 23.74, 23.50, 23.01, 22.30, 21.72.

HRMS (ESI-TOF):  $\text{C}_{26}\text{H}_{34}\text{F}_3\text{N}_2\text{O}_3$  [ $\text{M}+\text{H}$ ] calculated 479.2522, found 479.2522.

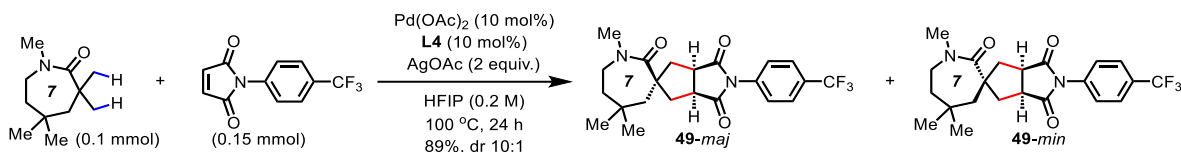

**49-maj** and **49-min** (37.4 mg) were isolated as mixture following the general procedure. Analytical amount of **49-maj** was purified for characterization.

$^1\text{H}$  NMR (**49-maj**, 600 MHz,  $\text{CDCl}_3$ )  $\delta$  7.70 (d,  $J = 8.4$  Hz, 2H), 7.56 (d,  $J = 8.3$  Hz, 2H), 3.47 – 3.42 (m, 2H), 3.41 – 3.37 (m, 2H), 2.99 (d,  $J = 13.7$  Hz, 2H), 2.87 (s, 3H), 1.98 (ddt,  $J = 16.3, 8.5, 4.4$  Hz, 2H), 1.62 (s, 2H), 1.47 – 1.44 (m, 2H), 1.00 (s, 6H).

$^{13}\text{C}$  NMR (**49-maj**, 151 MHz,  $\text{CDCl}_3$ )  $\delta$  178.82, 175.53, 136.12, 130.28 (q,  $J = 32.7$  Hz), 127.35, 126.13 (q,  $J = 3.8$  Hz), 124.02 (q,  $J = 272.3$  Hz), 53.96, 49.08, 47.08, 45.52, 42.32, 39.52, 38.30, 33.95, 31.19.

HRMS (ESI-TOF):  $\text{C}_{22}\text{H}_{26}\text{F}_3\text{N}_2\text{O}_3$  [ $\text{M}+\text{H}$ ] calculated 423.1896, found 423.1895.

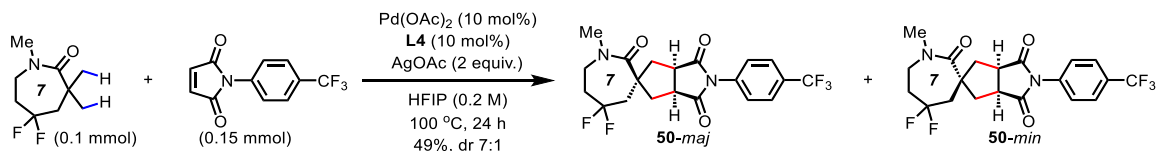

**50-maj** (18.3 mg) and **50-min** (2.7 mg) were isolated separately following the general procedure.

$^1\text{H}$  NMR (**50-maj**, 600 MHz,  $\text{CDCl}_3$ )  $\delta$  7.71 (d,  $J = 8.4$  Hz, 2H), 7.54 (d,  $J = 8.3$  Hz, 2H), 3.55 (br s, 2H), 3.45 – 3.41 (m, 2H), 3.00 (d,  $J = 13.9$  Hz, 2H), 2.93 (s, 3H), 2.21 – 2.14 (m, 2H), 2.14 – 2.03 (m, 4H).

$^{13}\text{C}$  NMR (**50-maj**, 151 MHz,  $\text{CDCl}_3$ )  $\delta$  178.24, 174.02, 135.82, 130.43 (q,  $J = 32.8$  Hz), 127.15, 126.19 (q,  $J = 3.8$  Hz), 123.95 (q,  $J = 272.1$  Hz), 123.22 (t,  $J = 239.9$  Hz), 50.65 (t,  $J = 5.0$  Hz), 45.14, 44.70 (t,  $J = 6.7$  Hz), 43.38 (t,  $J = 25.8$  Hz), 40.58, 39.02, 36.18 (t,  $J = 25.1$  Hz).

HRMS (ESI-TOF):  $\text{C}_{20}\text{H}_{20}\text{F}_5\text{N}_2\text{O}_3$  [ $\text{M}+\text{H}$ ] calculated 431.1394, found 431.1394.

$^1\text{H}$  NMR (**50-min**, 600 MHz,  $\text{CDCl}_3$ )  $\delta$  7.75 (d,  $J = 8.2$  Hz, 2H), 7.48 (d,  $J = 8.2$  Hz, 2H), 3.62 – 3.56 (m, 2H), 3.56 – 3.51 (m, 2H), 3.09 (s, 3H), 2.92 (dd,  $J = 12.4, 8.8$  Hz, 2H), 2.21 – 2.09 (m, 4H), 2.02 – 1.97 (m, 2H).

$^{13}\text{C}$  NMR (**50-min**, 151 MHz,  $\text{CDCl}_3$ )  $\delta$  177.75, 173.34, 135.03, 130.71 (q,  $J = 33.0$  Hz), 126.78, 126.44 (q,  $J = 3.7$  Hz), 123.80 (q,  $J = 272.7$  Hz), 123.01 (t,  $J = 240.1$  Hz), 53.24 (t,  $J = 4.9$  Hz), 45.26, 44.60 (t,  $J = 6.6$  Hz), 42.51 (t,  $J = 25.8$  Hz), 40.12, 38.83, 36.15 (t,  $J = 25.2$  Hz).

HRMS (ESI-TOF):  $\text{C}_{20}\text{H}_{20}\text{F}_5\text{N}_2\text{O}_3$  [ $\text{M}+\text{H}$ ] calculated 431.1394, found 431.1396.

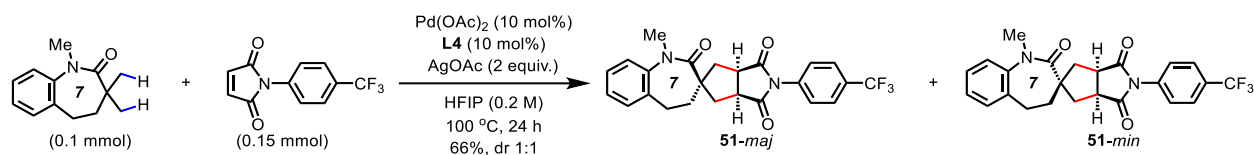

**51-maj** and **51-min** (29.0 mg) were isolated as mixture following the general procedure.

<sup>1</sup>H NMR (**51-maj** + **51-min**, 600 MHz, CDCl<sub>3</sub>) δ 7.75 (d, *J* = 8.4 Hz, 1H), 7.71 (d, *J* = 8.3 Hz, 1H), 7.60 (d, *J* = 8.2 Hz, 1H), 7.41 (d, *J* = 8.3 Hz, 1H), 7.37 – 7.30 (m, 1H), 7.20 – 7.13 (m, 2.5H), 7.08 (d, *J* = 8.0 Hz, 0.5H), 3.43 (s, 1.5H), 3.29 (br s, 1H), 3.21 – 3.17 (m, 1H), 3.17 (s, 1.5H), 3.04 – 2.35 (m, 4H), 2.20 (br s, 2H), 1.52 (br s, 2H).

<sup>13</sup>C NMR (**51-maj** + **51-min**, 151 MHz, CDCl<sub>3</sub>) δ 178.30, 178.01, 174.24, 173.78, 143.91, 143.50, 135.75, 135.18, 135.11, 135.06, 130.54 (q, *J* = 33.0 Hz), 130.44 (d, *J* = 32.5 Hz), 129.22, 129.14, 128.61, 128.54, 127.13, 126.67, 126.61, 126.35 (q, *J* = 3.7 Hz), 126.23, 126.22 (q, *J* = 3.5 Hz), 123.97 (q, *J* = 272.3 Hz), 123.78 (q, *J* = 272.3 Hz), 122.57, 122.29, 56.32, 53.65, 44.87, 44.76, 44.46, 43.70, 40.91, 40.87, 37.62, 37.58, 30.18, 30.04.

HRMS (ESI-TOF): C<sub>24</sub>H<sub>22</sub>F<sub>3</sub>N<sub>2</sub>O<sub>3</sub> [M+H] calculated 443.1583, found 443.1585.

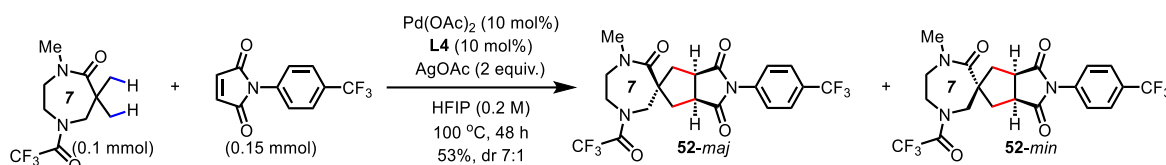

**52-maj** and **52-min** (26.2 mg) were isolated as mixture following the general procedure. Analytical amount of **52-maj** was purified for characterization.

<sup>1</sup>H NMR (**52-maj**, 600 MHz, CDCl<sub>3</sub>) (0.85:0.15 ratio of rotamers) δ 7.72 (d, *J* = 8.3 Hz, 2H), 7.53 (d, *J* = 8.2 Hz, 2H), 3.86 – 3.68 (m, 4H), 3.67 – 3.61 (m, 2H), 3.54 – 3.48 (m, 2H), 3.00 – 2.91 (m, 3.3H), 2.86 (d, *J* = 13.8 Hz, 1.7H), 2.18 (ddd, *J* = 13.9, 7.5, 2.5 Hz, 1.7H), 2.09 – 2.02 (m, 0.3H).

<sup>13</sup>C NMR (**52-maj**, 151 MHz, CDCl<sub>3</sub>) (major rotamer) δ 178.10, 174.66, 156.96 (q, *J* = 36.5 Hz), 135.80, 130.52 (q, *J* = 33.1 Hz), 127.24, 126.25 (q, *J* = 3.8 Hz), 55.87, 50.88, 50.46, 48.27, 45.34, 39.11, 38.71. (–CF<sub>3</sub> peak was not found due to weak intensity)

HRMS (ESI-TOF): C<sub>21</sub>H<sub>20</sub>F<sub>6</sub>N<sub>3</sub>O<sub>4</sub> [M+H] calculated 492.1358, found 492.1356.

## 2.3 Evaluation of electron-deficient olefins

Table S1. Evaluation of electron-deficient cyclic olefins

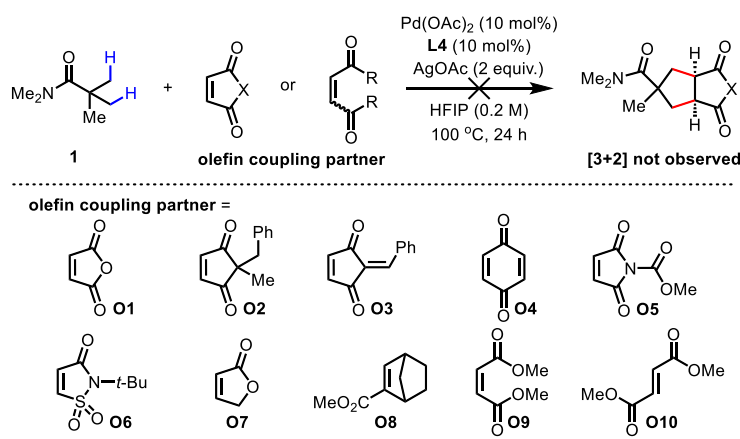

Following the General Procedure above, various olefins (**O1**~**O10**) were tested as coupling partner. However, no formation of [3+2] product was observed in any case.

## 2.4 Procedure for gram-scale reaction & silver-free reaction

### 2.4.1 Gram-scale reaction with Ag oxidant

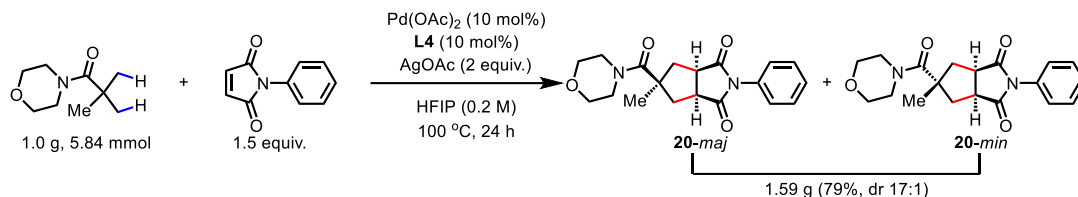

A 150 mL sealed vessel with magnetic stir bar was charged with Pd(OAc)<sub>2</sub> (10 mol%, 131.1 mg), **L4** (10 mol%, 132.7 mg), AgOAc (11.68 mmol, 1.95 g), *N*-phenylmaleimide (8.76 mmol, 1.52 g), and substrate (5.84 mmol, 1.00 g) in air. Then, HFIP (30 mL) was added as solvent. The reaction tube was sealed and stirred at 100 °C for 24 hours. Upon completion, the reaction mixture was cooled to room temperature, diluted with EtOAc, filtered through a plug of silica and celite, and concentrated *in vacuo*. The crude reaction mixture was purified by flash column chromatography using hexanes/EtOAc as eluent to afford **20-maj** and **20-min** as mixture (1.59 g, 79% yield, dr 17:1).

### 2.4.2 Oxidant screening for silver-free [3+2] reaction

Table S2. Oxidant screening for silver-free [3+2] reaction

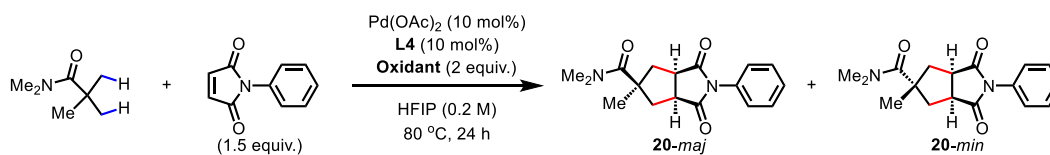

| entry | Oxidant                                              | Yield, dr                                      |
|-------|------------------------------------------------------|------------------------------------------------|
| 1     | TBHP (5.0–6.0 M in Decane)                           | 23%, 3:1                                       |
| 2     | TBHP (70 wt. % in H <sub>2</sub> O)                  | 27%, 4:1                                       |
| 3     | K <sub>2</sub> S <sub>2</sub> O <sub>8</sub>         | 21%, 3:1                                       |
| 4     | DTBP                                                 | 27%, 2:1                                       |
| 5     | NFSI                                                 | <5%                                            |
| 6     | Selecfleur                                           | <10%                                           |
| 7     | Cu(OAc) <sub>2</sub>                                 | 22%, 5:1                                       |
| 8     | CuF <sub>2</sub>                                     | 24%, 2:1                                       |
| 9     | Cu(OAc) <sub>2</sub> (Under O <sub>2</sub> )         | 37%, 3:1 (significant substrate decomposition) |
| 10    | Cu(OAc) <sub>2</sub> (100 °C, Under N <sub>2</sub> ) | 58%, 5:1                                       |

Conditions: substrate (0.1–0.2 mmol), Pd(OAc)<sub>2</sub> (10 mol%), **L4** (10 mol%), *N*-phenylmaleimide (1.5 equiv.), Oxidant (2 equiv.), HFIP (0.2 M), 80 °C, 24 h. Yields were determined by <sup>1</sup>H NMR analysis of the crude product using CH<sub>2</sub>Br<sub>2</sub> as the internal standard.

### 2.4.3 Gram-scale reaction with Cu oxidant

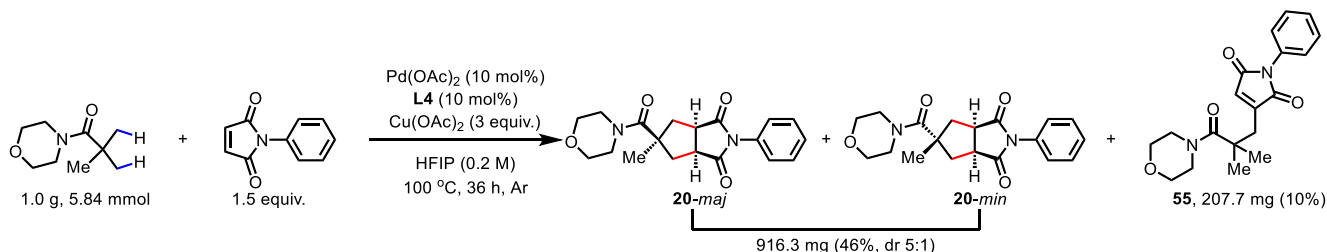

A 150 mL sealed vessel with magnetic stir bar was charged with Pd(OAc)<sub>2</sub> (10 mol%, 131.1 mg), **L4** (10 mol%, 132.7 mg), Cu(OAc)<sub>2</sub> (17.52 mmol, 3.18 g), *N*-phenylmaleimide (8.76 mmol, 1.52 g), and substrate (5.84 mmol, 1.00 g) in air. Then, HFIP (30 mL) was added as solvent. The reaction tube was placed under vacuum and refilled with Argon for three times. The reaction tube was sealed and stirred at 100 °C for 36 hours. Upon completion, the reaction mixture was cooled to room temperature, diluted with EtOAc, filtered through a plug of silica and celite, and concentrated *in vacuo*.

*vacuo*. The crude reaction mixture was purified by flash column chromatography using hexanes/EtOAc as eluent to afford **20-maj** and **20-min** as mixture (916.3 mg, 46% yield, dr 5:1). It is important to note that Heck product **55** was also isolated from the crude mixture (207.7 mg, 10% yield).

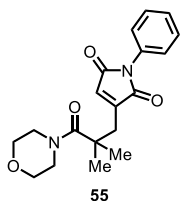

$^1\text{H}$  NMR (600 MHz,  $\text{CDCl}_3$ )  $\delta$  7.47 – 7.43 (m, 2H), 7.37 – 7.33 (m, 3H), 6.56 (t,  $J = 1.5$  Hz, 1H), 3.71 – 3.66 (m, 8H), 2.84 (d,  $J = 1.5$  Hz, 2H), 1.39 (s, 6H).

$^{13}\text{C}$  NMR (151 MHz,  $\text{CDCl}_3$ )  $\delta$  174.29, 171.16, 169.76, 146.32, 131.72, 129.44, 129.16, 127.81, 125.99, 66.90, 46.01, 43.14, 36.18, 26.22.

HRMS (ESI-TOF):  $\text{C}_{19}\text{H}_{23}\text{N}_2\text{O}_4$  [M+H] calculated 343.1658, found 343.1661.

## 2.5 Attempted reaction with Heck product **55**

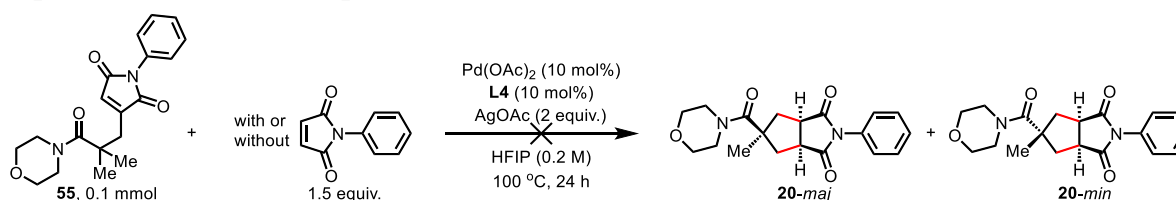

Following the General Procedure above, Heck product **55** was subjected into the reaction conditions with or without *N*-phenylmaleimide.  $^1\text{H}$  NMR analysis revealed no formation of the [3+2] product **20**.

## 2.6 Attempted reaction with pivalic acid

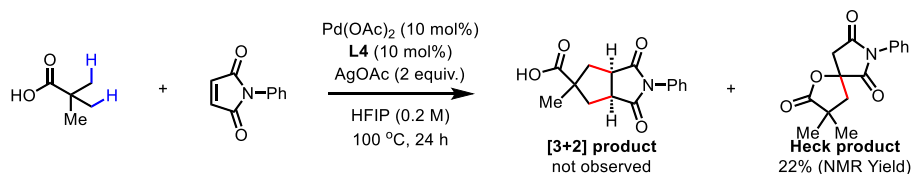

Following the General Procedure above, pivalic acid was subjected into the reaction conditions with *N*-phenylmaleimide. Only the Heck product lactone was observed through  $^1\text{H}$  NMR analysis. The spectroscopic data of the lactone matched the reported data from reference 1.

## 2.7 Desymmetrization of **20**

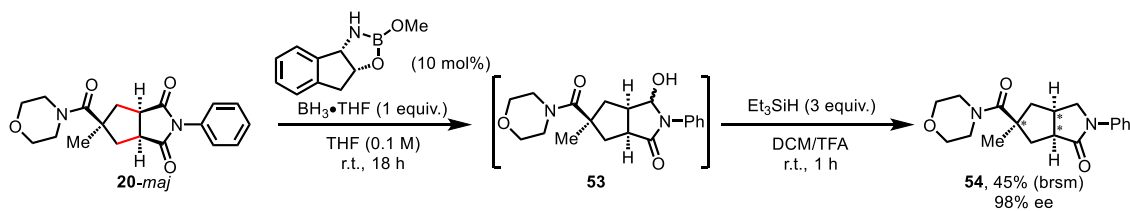

Catalyst preparation<sup>4</sup>: To a solution of freshly recrystallized (1*S*,2*R*)-*cis*-1-aminoindan-2-ol (186.5 mg, 1.25 mmol) in THF (3 ml) was added trimethylborate (140  $\mu\text{L}$ , 1.25 mmol) under  $\text{N}_2$  atmosphere. The reaction mixture was stirred for 30 min at room temperature. 2 ml of THF was added to make a 2.5 M stock solution of the oxazaborolidine catalyst.

To a solution of **20-maj** (68.4 mg, 0.2 mmol) in THF (2 mL) was added the catalyst solution (40 uL, 10 mol%) and 1M BH<sub>3</sub>·THF (200 uL, 0.2 mmol) under N<sub>2</sub> atmosphere. After stirring for 18 h at room temperature, the reaction was quenched with dropwise addition of 1 N HCl (aq), and was extracted with DCM. The combined organic extracts were dried over MgSO<sub>4</sub> and concentrated *in vacuo* to give the crude hydroxylactam **53**. Without further purification, **53** was dissolved in DCM (2 mL) and treated with TFA (0.1 mL) and triethylsilane (0.1 mL). After stirring for 1 h at room temperature, sat. NaHCO<sub>3</sub> (aq) was added followed by extraction with DCM. The combined organic extracts were dried over MgSO<sub>4</sub>, concentrated *in vacuo*, and purified via pTLC using hexanes/EtOAc as eluent to afford **54** (19.7 mg) along with substrate **20-maj** (22.3 mg). The ee value (98%) was determined by SFC analysis on a Chiralcel OD-3 column (20% isopropanol, 2.0 mL/min) with retention time of 8.159 min (major) and 11.497 min (minor).

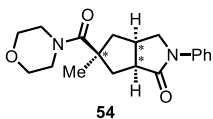

<sup>1</sup>H NMR (600 MHz, CDCl<sub>3</sub>) δ 7.59 (d, *J* = 7.8 Hz, 2H), 7.38 – 7.33 (m, 2H), 7.14 (t, *J* = 7.4 Hz, 1H), 4.02 (dd, *J* = 9.8, 7.4 Hz, 1H), 3.72 – 3.52 (m, 9H), 3.20 (td, *J* = 9.5, 3.9 Hz, 1H), 2.89 – 2.81 (m, 1H), 2.53 (dd, *J* = 13.6, 3.9 Hz, 1H), 2.33 (dd, *J* = 13.4, 9.3 Hz, 1H), 2.11 (dd, *J* = 13.3, 10.3 Hz, 1H), 2.03 (dd, *J* = 13.4, 7.6 Hz, 1H), 1.34 (s, 3H).

<sup>13</sup>C NMR (151 MHz, CDCl<sub>3</sub>) δ 175.82, 175.06, 139.42, 128.95, 124.98, 120.62, 66.81, 52.68, 51.01, 48.44, 45.45, 39.64, 32.85, 25.35. (–N(CH<sub>2</sub>)– peaks were not found due to weak intensity)

HRMS (ESI-TOF): C<sub>19</sub>H<sub>25</sub>N<sub>2</sub>O<sub>3</sub> [M+H] calculated 329.1860, found 329.1866.

DAD1 A, Sig=250,4 Ref=360,100 (HP\HP 2020-02-11 20-16-37\003-6-HP\_9\_20\_rac\_OD\_20%.D)

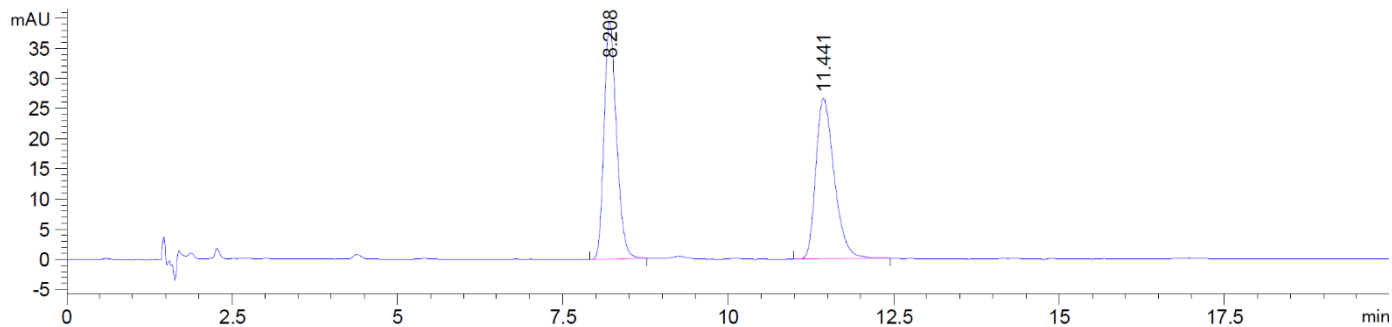

DAD1 A, Sig=250,4 Ref=360,100 (HP\HP 2020-02-11 20-16-37\004-7-HP\_9\_18\_chiral\_OD\_20%.D)

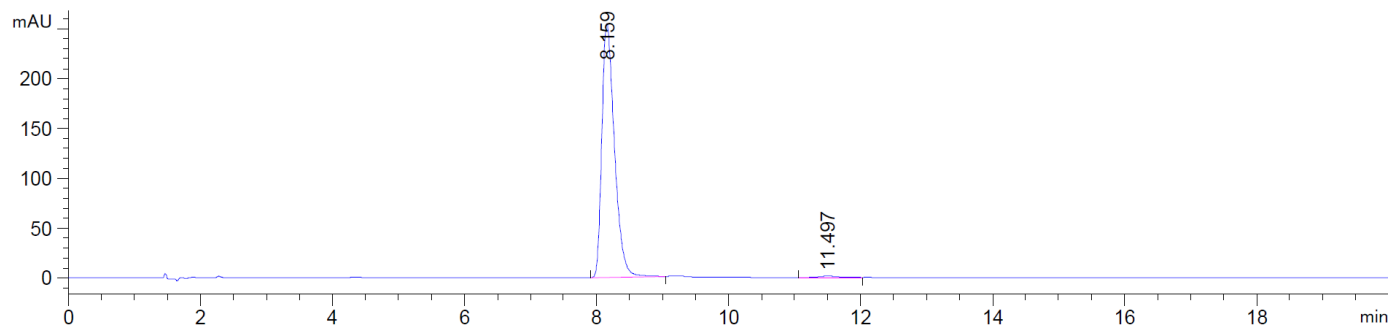

| Peak # | RetTime [min] | Type | Width [min] | Area [mAU*s] | Height [mAU] | Area %  |
|--------|---------------|------|-------------|--------------|--------------|---------|
| 1      | 8.159         | BB   | 0.2028      | 3383.66113   | 255.06105    | 99.1329 |
| 2      | 11.497        | BB   | 0.2776      | 29.59540     | 1.39474      | 0.8671  |

## 2.8 X-Ray Crystallographic Data of *31-maj*, *31-min*, and *28-maj*

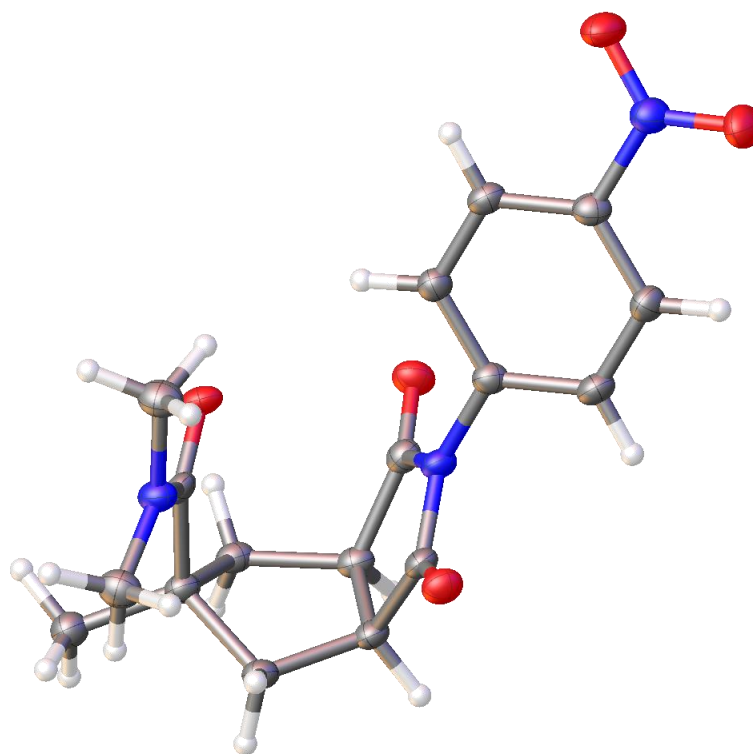

Table S3. Crystal data and structure refinement for **31-maj**. (CCDC1995507)

|                                 |                                                               |                 |
|---------------------------------|---------------------------------------------------------------|-----------------|
| Empirical formula               | C <sub>17</sub> H <sub>19</sub> N <sub>3</sub> O <sub>5</sub> |                 |
| Formula weight                  | 345.35                                                        |                 |
| Temperature                     | 100.15 K                                                      |                 |
| Wavelength                      | 1.54178 Å                                                     |                 |
| Crystal system                  | Monoclinic                                                    |                 |
| Space group                     | P 1 21/n 1                                                    |                 |
| Unit cell dimensions            | a = 11.3909(6) Å                                              | α = 90°.        |
|                                 | b = 6.6075(4) Å                                               | β = 98.175(4)°. |
|                                 | c = 22.1827(12) Å                                             | γ = 90°.        |
| Volume                          | 1652.62(16) Å <sup>3</sup>                                    |                 |
| Z                               | 4                                                             |                 |
| Density (calculated)            | 1.388 Mg/m <sup>3</sup>                                       |                 |
| Absorption coefficient          | 0.866 mm <sup>-1</sup>                                        |                 |
| F(000)                          | 728                                                           |                 |
| Crystal size                    | 0.17 x 0.11 x 0.08 mm <sup>3</sup>                            |                 |
| Theta range for data collection | 4.026 to 70.066°.                                             |                 |
| Index ranges                    | -13 ≤ h ≤ 13, -8 ≤ k ≤ 7, -27 ≤ l ≤ 26                        |                 |
| Reflections collected           | 15057                                                         |                 |
| Independent reflections         | 3051 [R(int) = 0.0610]                                        |                 |
| Completeness to theta = 67.500° | 97.9 %                                                        |                 |

|                                   |                                             |
|-----------------------------------|---------------------------------------------|
| Absorption correction             | Semi-empirical from equivalents             |
| Max. and min. transmission        | 0.7536 and 0.5963                           |
| Refinement method                 | Full-matrix least-squares on F <sup>2</sup> |
| Data / restraints / parameters    | 3051 / 0 / 229                              |
| Goodness-of-fit on F <sup>2</sup> | 1.107                                       |
| Final R indices [I>2sigma(I)]     | R1 = 0.0540, wR2 = 0.1293                   |
| R indices (all data)              | R1 = 0.0663, wR2 = 0.1362                   |
| Extinction coefficient            | n/a                                         |
| Largest diff. peak and hole       | 0.312 and -0.242 e.Å <sup>-3</sup>          |

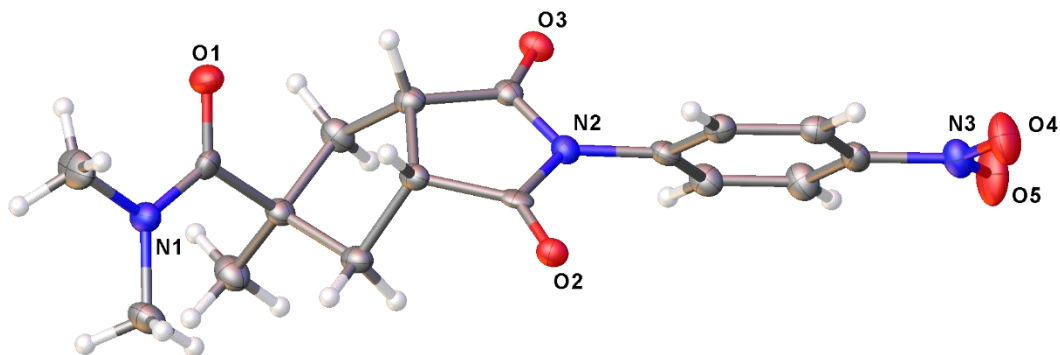

Table S4. Crystal data and structure refinement for **31-min.** (CCDC1995509)

|                                 |                                    |                   |
|---------------------------------|------------------------------------|-------------------|
| Empirical formula               | C17 H19 N3 O5 (racemic)            |                   |
| Formula weight                  | 345.35                             |                   |
| Temperature                     | 100.15 K                           |                   |
| Wavelength                      | 0.71073 Å                          |                   |
| Crystal system                  | Triclinic                          |                   |
| Space group                     | P-1                                |                   |
| Unit cell dimensions            | a = 9.548(4) Å                     | α = 109.288(16)°. |
|                                 | b = 16.622(6) Å                    | β = 98.811(12)°.  |
|                                 | c = 22.118(8) Å                    | γ = 95.569(10)°.  |
| Volume                          | 3233(2) Å <sup>3</sup>             |                   |
| Z, Z'                           | 8, 4                               |                   |
| Density (calculated)            | 1.419 Mg/m <sup>3</sup>            |                   |
| Absorption coefficient          | 0.106 mm <sup>-1</sup>             |                   |
| F(000)                          | 1456                               |                   |
| Crystal size                    | 0.31 x 0.27 x 0.25 mm <sup>3</sup> |                   |
| Theta range for data collection | 1.314 to 25.427°.                  |                   |
| Index ranges                    | -11<=h<=10, -19<=k<=19, -26<=l<=26 |                   |
| Reflections collected           | 31963                              |                   |
| Independent reflections         | 11851 [R(int) = 0.0799]            |                   |



|                                   |                                             |
|-----------------------------------|---------------------------------------------|
| Completeness to theta = 25.242°   | 100.0 %                                     |
| Absorption correction             | Semi-empirical from equivalents             |
| Max. and min. transmission        | 0.7452 and 0.6313                           |
| Refinement method                 | Full-matrix least-squares on F <sup>2</sup> |
| Data / restraints / parameters    | 11851 / 0 / 978                             |
| Goodness-of-fit on F <sup>2</sup> | 1.034                                       |
| Final R indices [I>2sigma(I)]     | R1 = 0.0594, wR2 = 0.1434                   |
| R indices (all data)              | R1 = 0.0901, wR2 = 0.1664                   |
| Extinction coefficient            | n/a                                         |
| Largest diff. peak and hole       | 0.357 and -0.307 e.Å <sup>-3</sup>          |

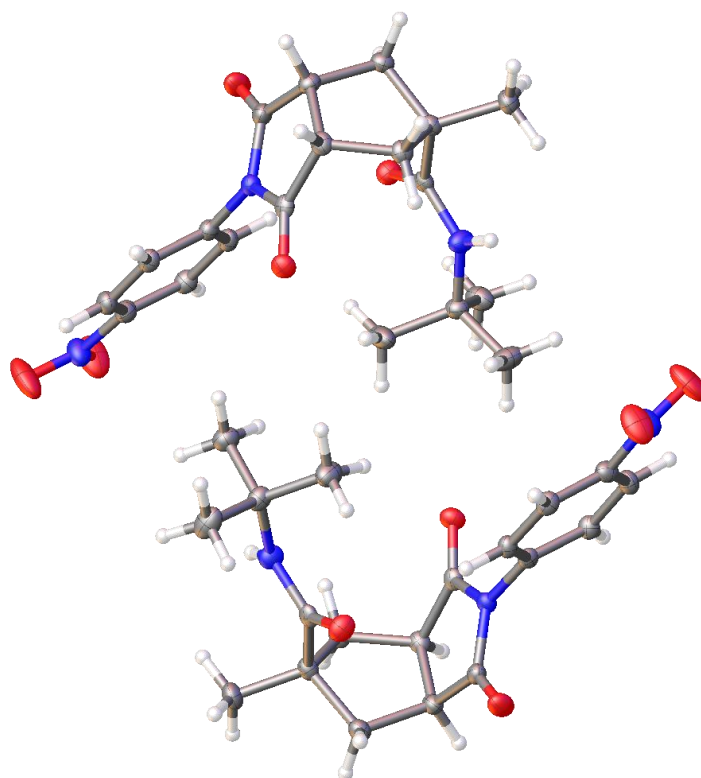

Table S5. Crystal data and structure refinement for **28-maj**. (CCDC1995508)

|                      |                                                               |          |
|----------------------|---------------------------------------------------------------|----------|
| Empirical formula    | C <sub>19</sub> H <sub>23</sub> N <sub>3</sub> O <sub>5</sub> |          |
| Formula weight       | 373.40                                                        |          |
| Temperature          | 100.0 K                                                       |          |
| Wavelength           | 1.54178 Å                                                     |          |
| Crystal system       | Orthorhombic                                                  |          |
| Space group          | Pna2 <sub>1</sub>                                             |          |
| Unit cell dimensions | a = 25.8413(3) Å                                              | α = 90°. |
|                      | b = 6.41810(10) Å                                             | β = 90°. |
|                      | c = 22.5133(3) Å                                              | γ = 90°. |
| Volume               | 3733.88(9) Å <sup>3</sup>                                     |          |

|                                   |                                             |
|-----------------------------------|---------------------------------------------|
| Z                                 | 8                                           |
| Density (calculated)              | 1.328 Mg/m <sup>3</sup>                     |
| Absorption coefficient            | 0.806 mm <sup>-1</sup>                      |
| F(000)                            | 1584                                        |
| Crystal size                      | 0.8 x 0.161 x 0.13 mm <sup>3</sup>          |
| Theta range for data collection   | 3.420 to 70.817°.                           |
| Index ranges                      | -31<=h<=29, -7<=k<=7, -27<=l<=27            |
| Reflections collected             | 40887                                       |
| Independent reflections           | 7037 [R(int) = 0.0627]                      |
| Completeness to theta = 67.500°   | 99.1 %                                      |
| Absorption correction             | Semi-empirical from equivalents             |
| Max. and min. transmission        | 0.7534 and 0.5303                           |
| Refinement method                 | Full-matrix least-squares on F <sup>2</sup> |
| Data / restraints / parameters    | 7037 / 1 / 495                              |
| Goodness-of-fit on F <sup>2</sup> | 1.026                                       |
| Final R indices [I>2sigma(I)]     | R1 = 0.0332, wR2 = 0.0856                   |
| R indices (all data)              | R1 = 0.0339, wR2 = 0.0863                   |
| Absolute structure parameter      | 0.06(6)                                     |
| Extinction coefficient            | n/a                                         |
| Largest diff. peak and hole       | 0.253 and -0.169 e.Å <sup>-3</sup>          |

### 3. References

- 1) Z. Zhuang *et al.*, *J. Am. Chem. Soc.* **140**, 10363–10367 (2018).
- 2) H. Park, N. Chekshin, P.-X. Shen, J.-Q. Yu, *ACS Catal.* **8**, 9292–9297 (2018).
- 3) H. Park, Y. Li, J.-Q. Yu, *Angew. Chem. Int Ed.* **58**, 11424–11428 (2019).
- 4) M. D. Barker, R. A. Dixon, S. Jones, B. J. Marsh, *Tetrahedron* **62**, 11663–11669 (2006).

# 4. <sup>1</sup>H and <sup>13</sup>C NMR Spectra

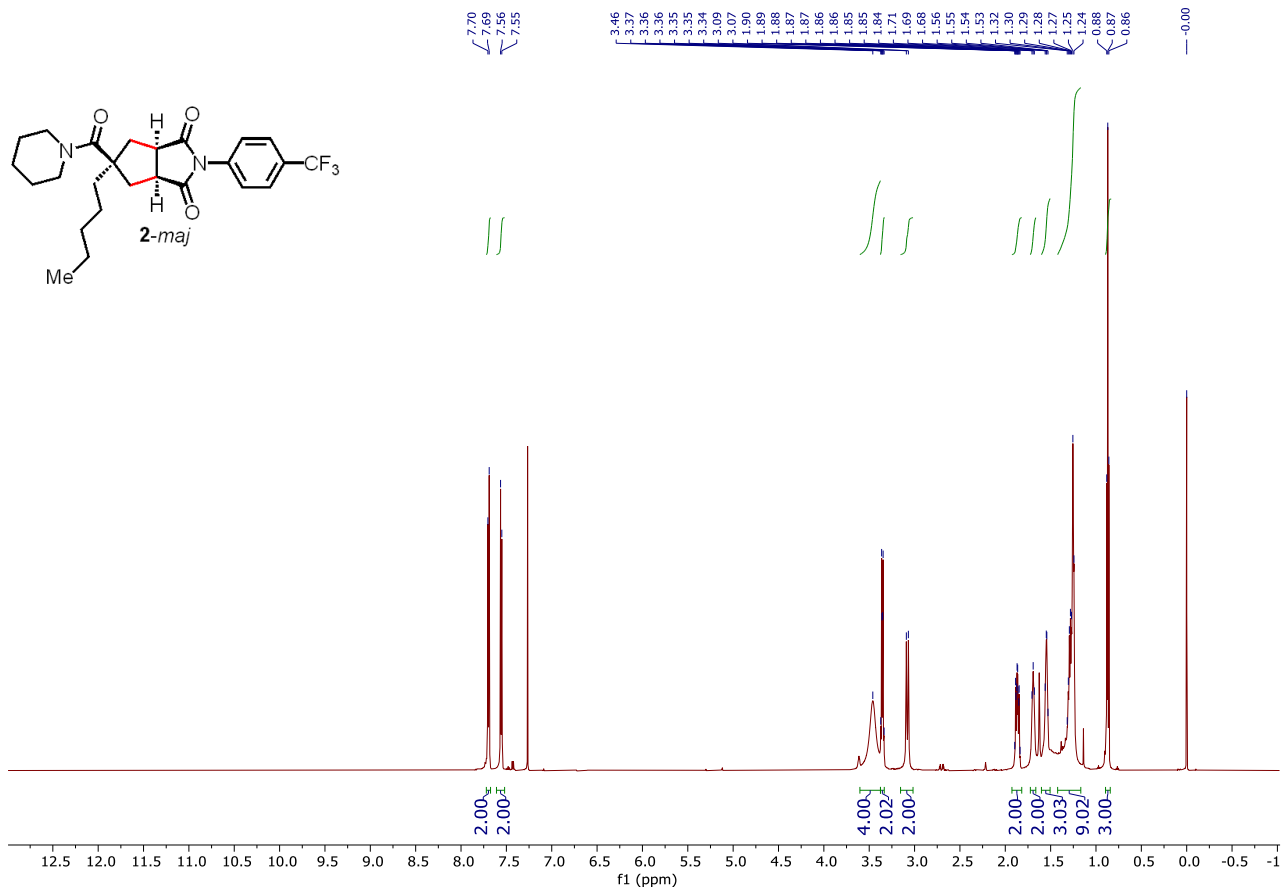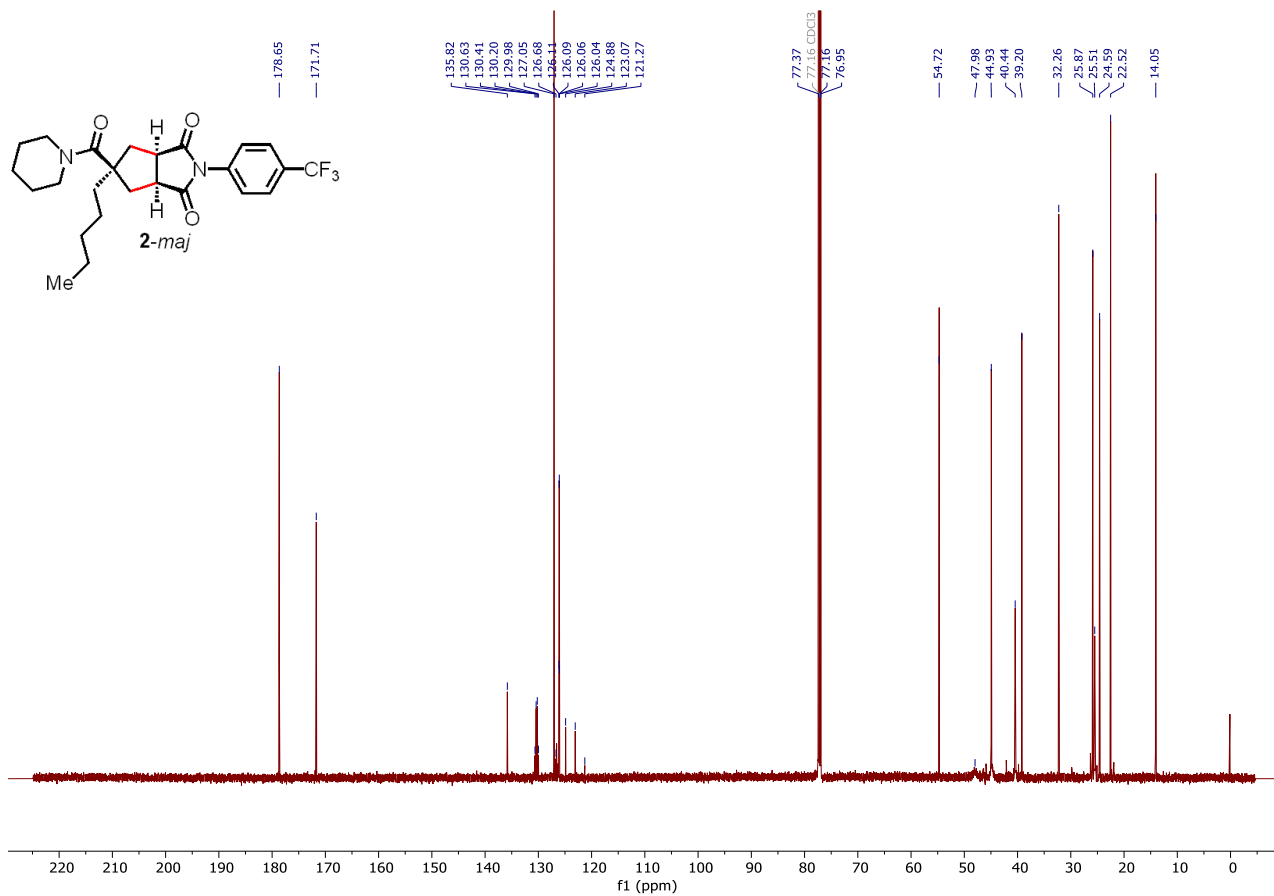

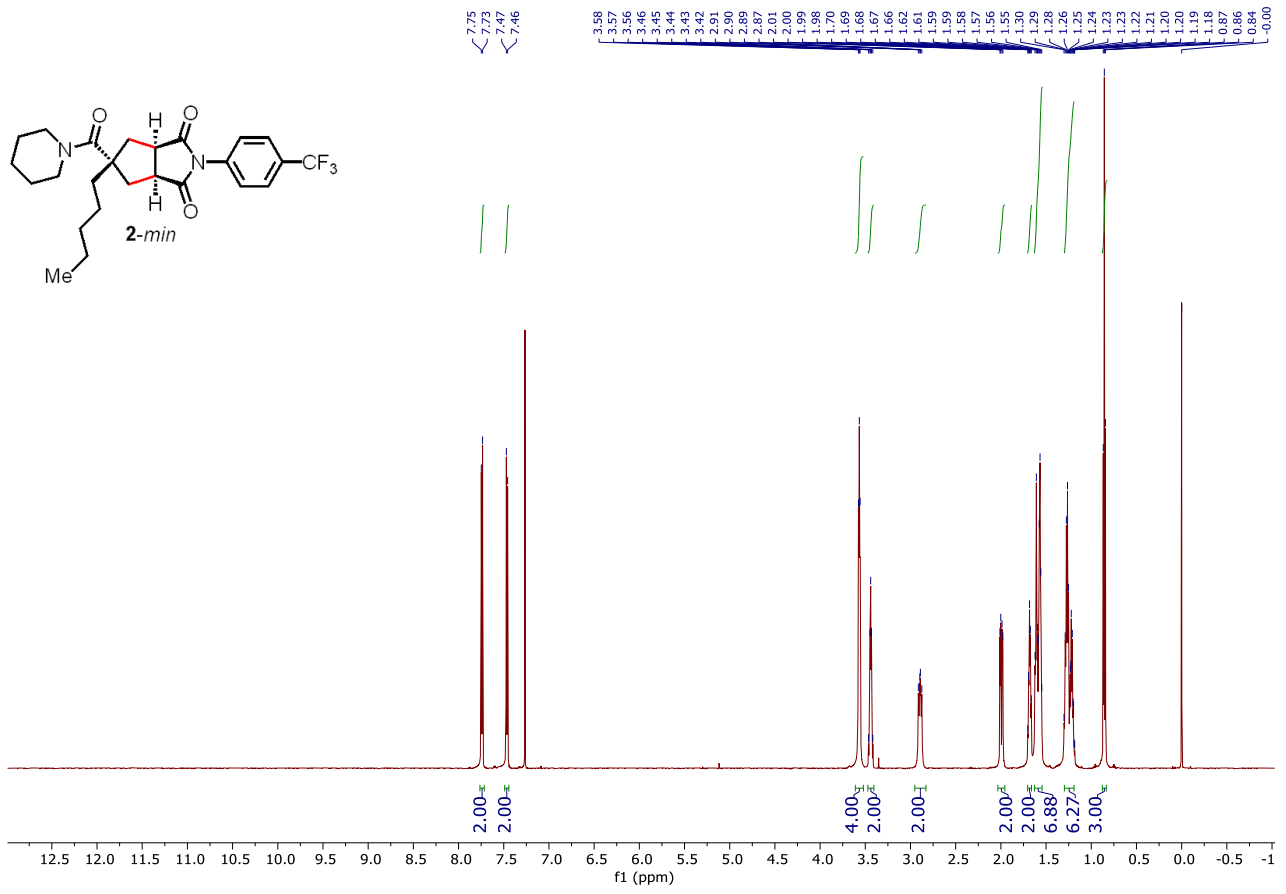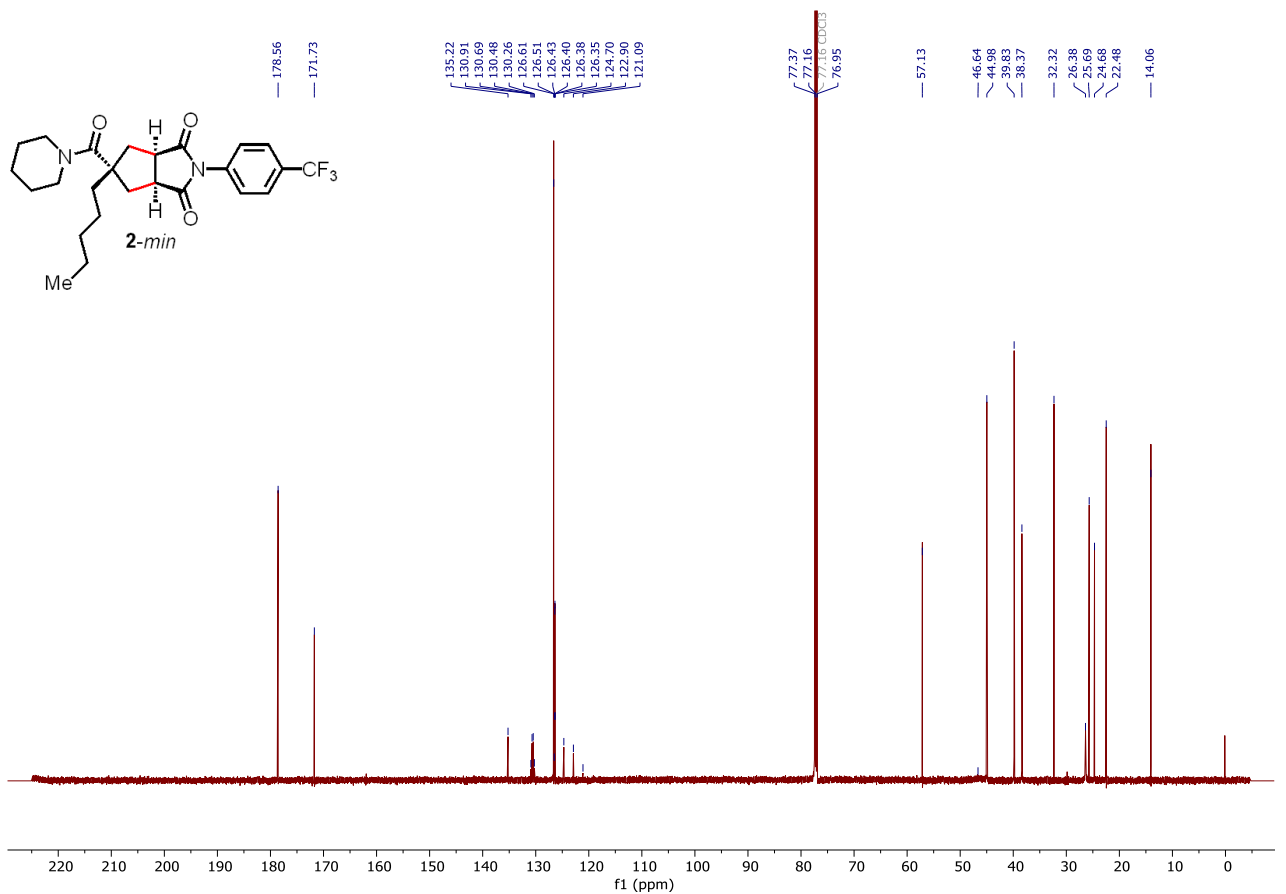

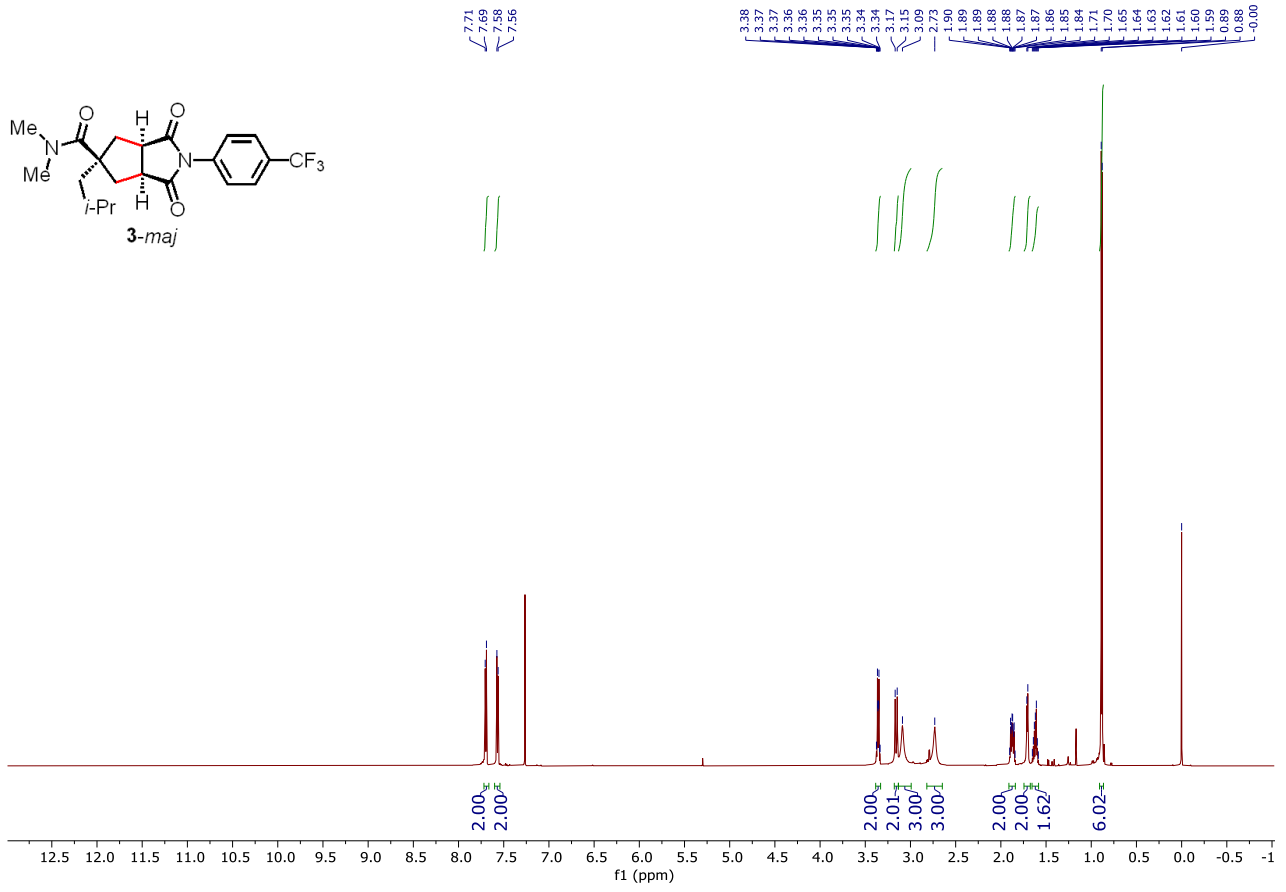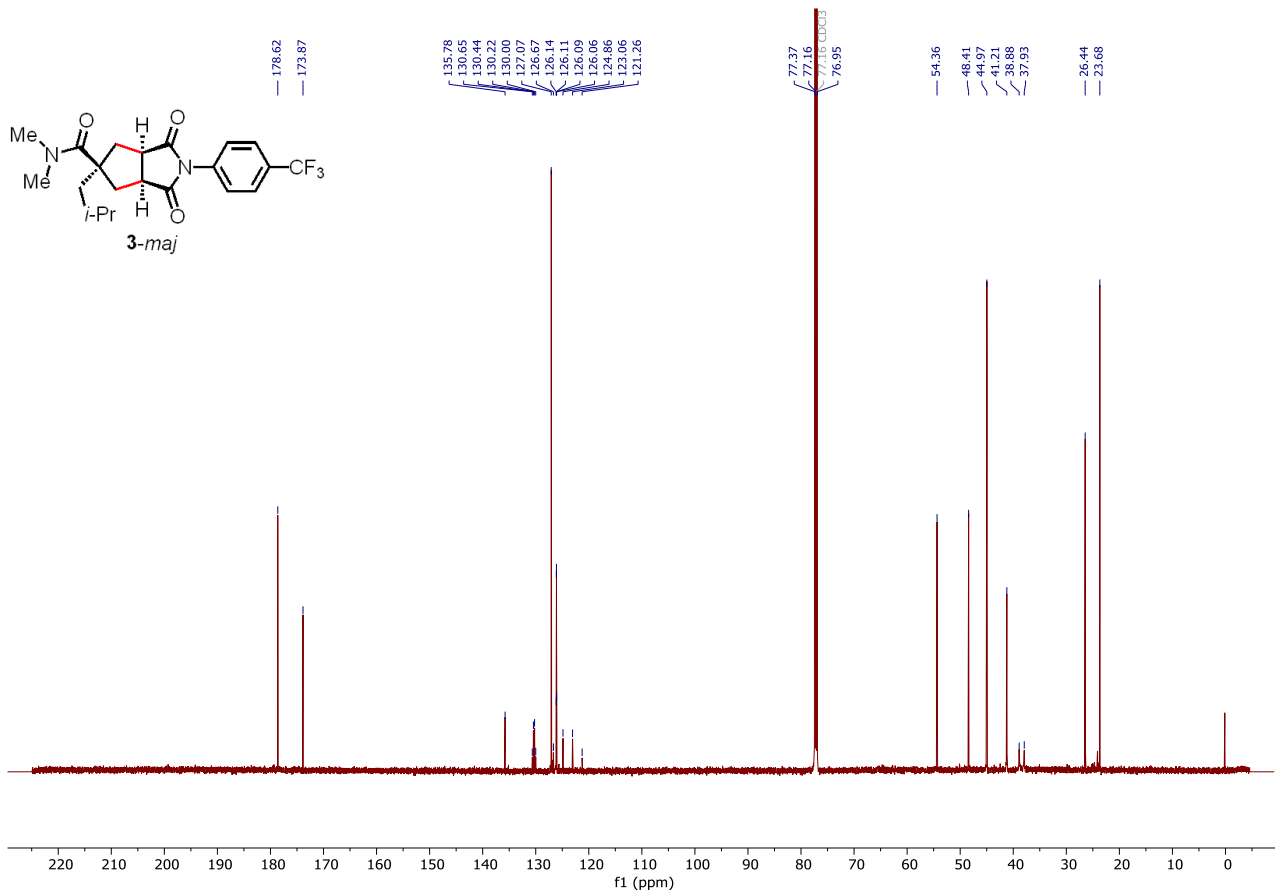

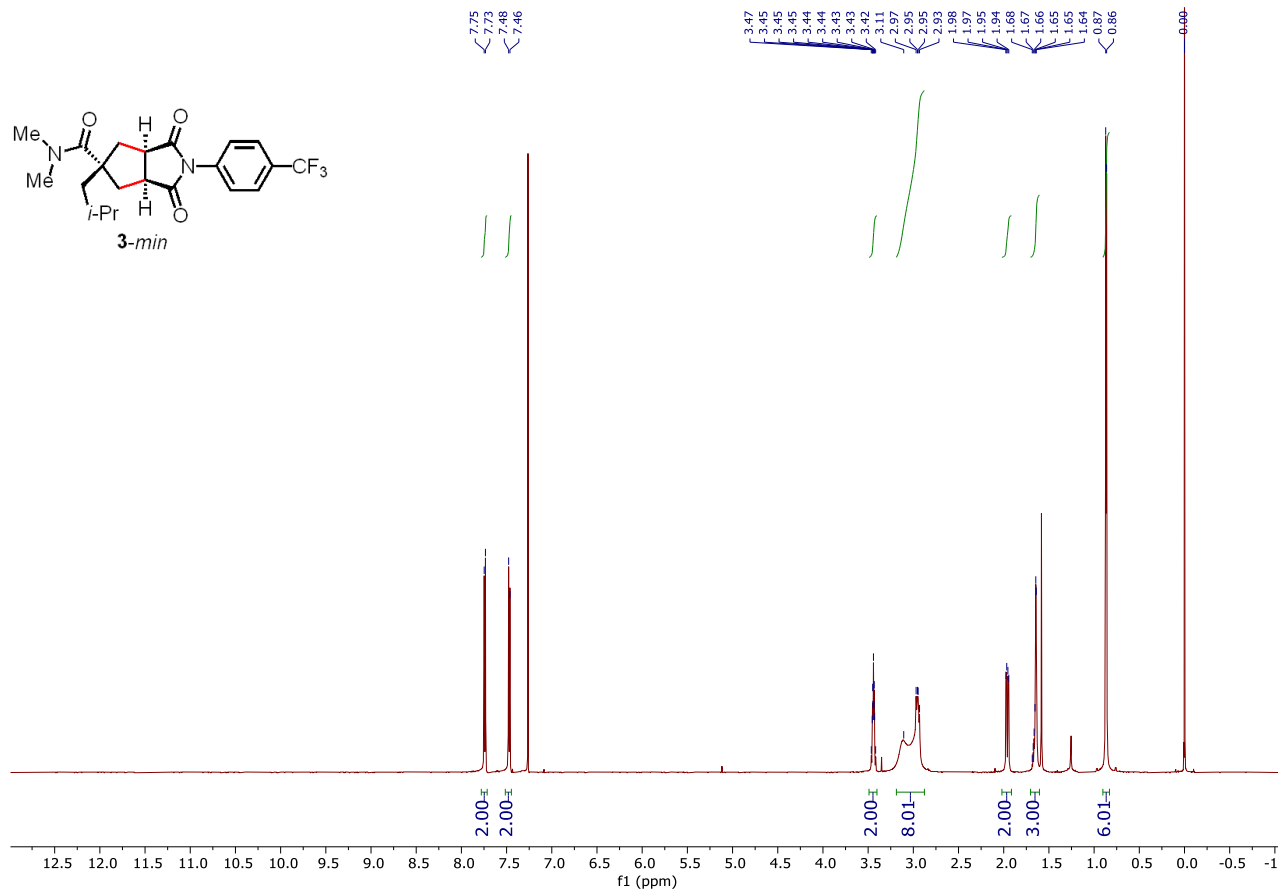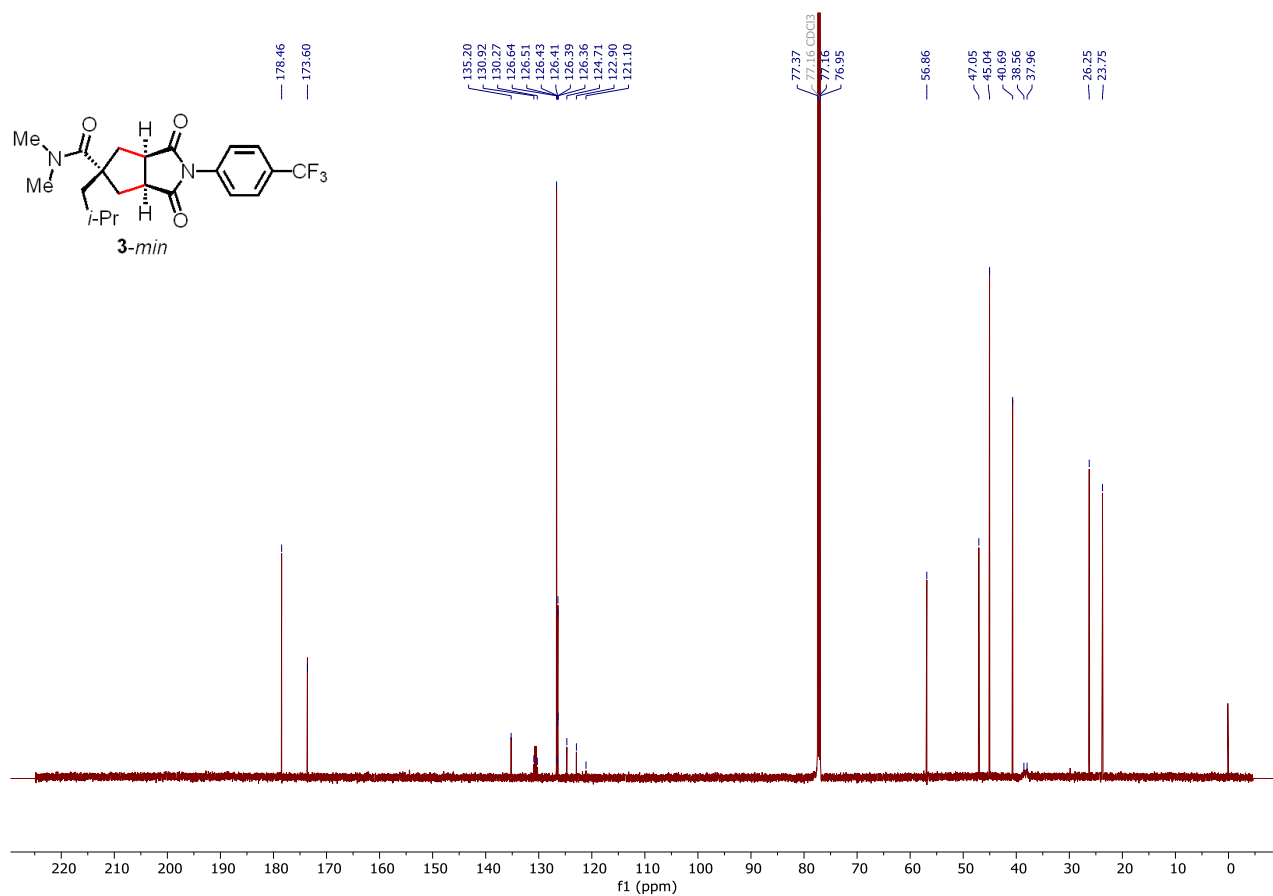

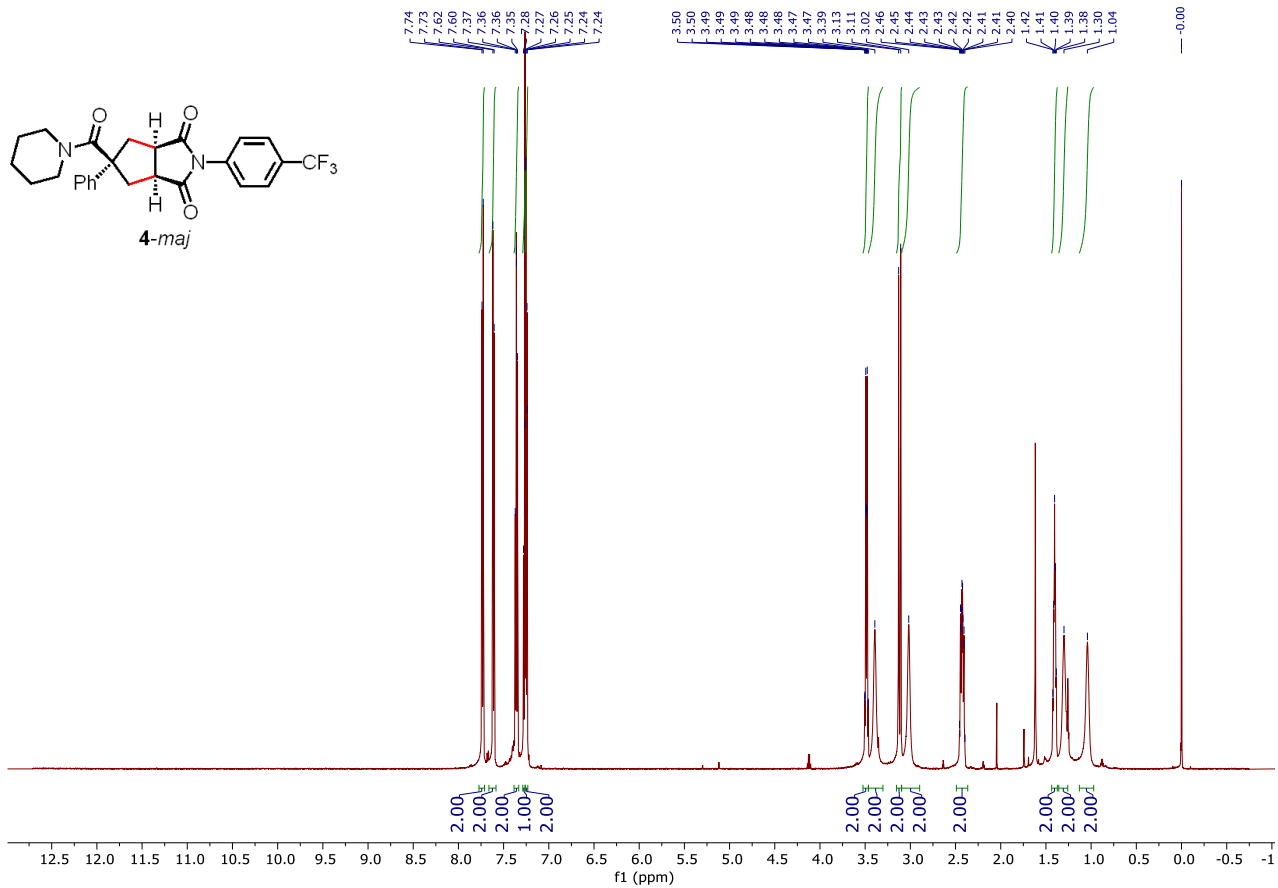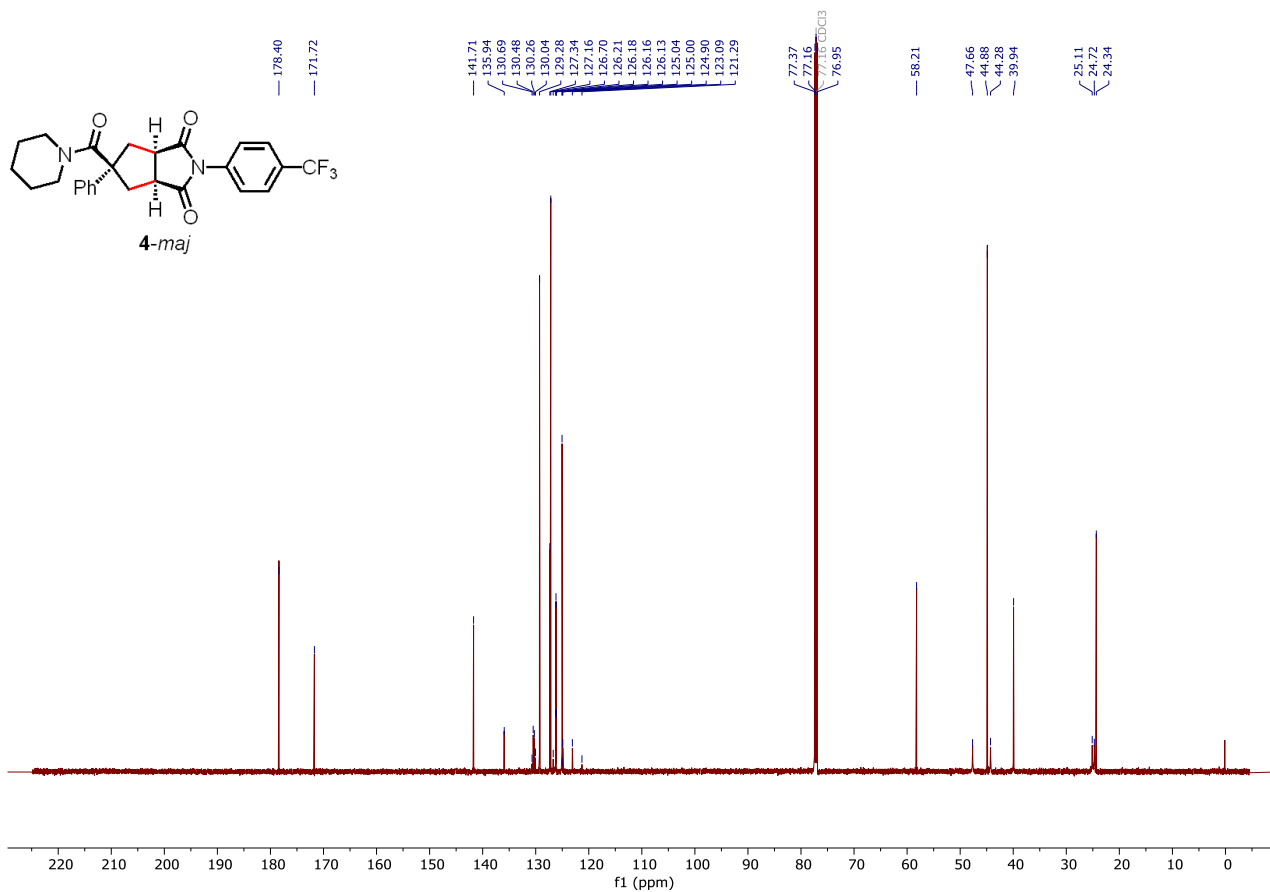



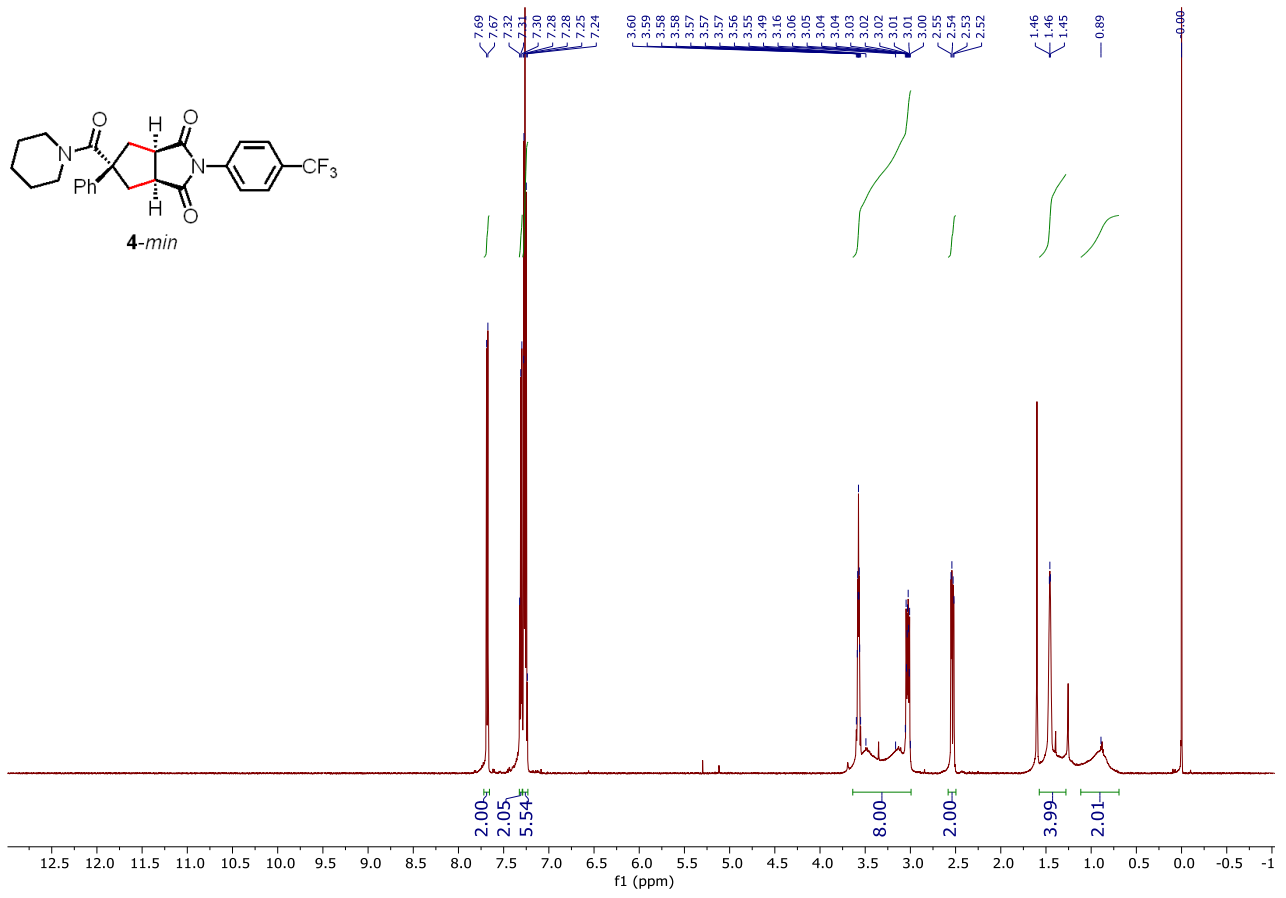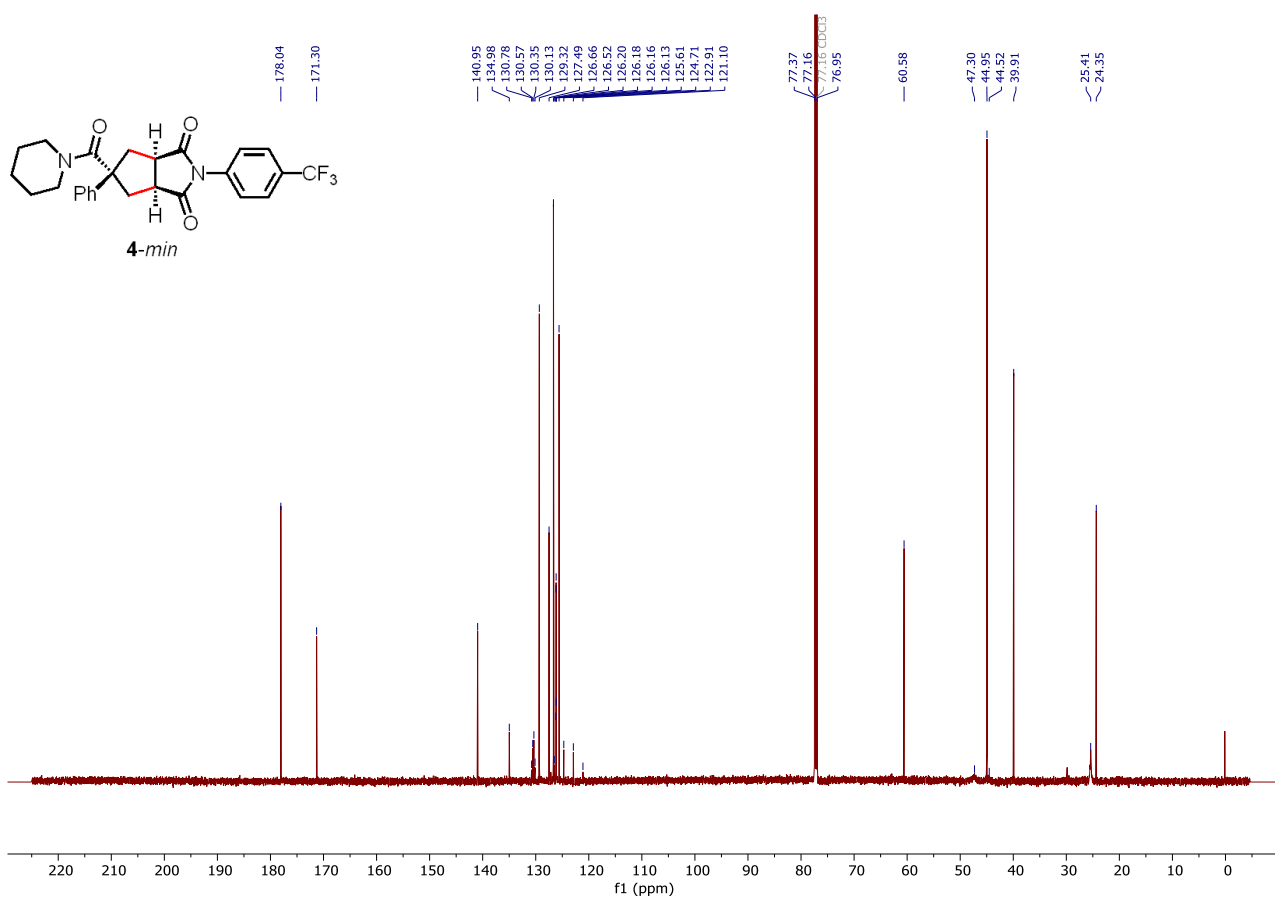

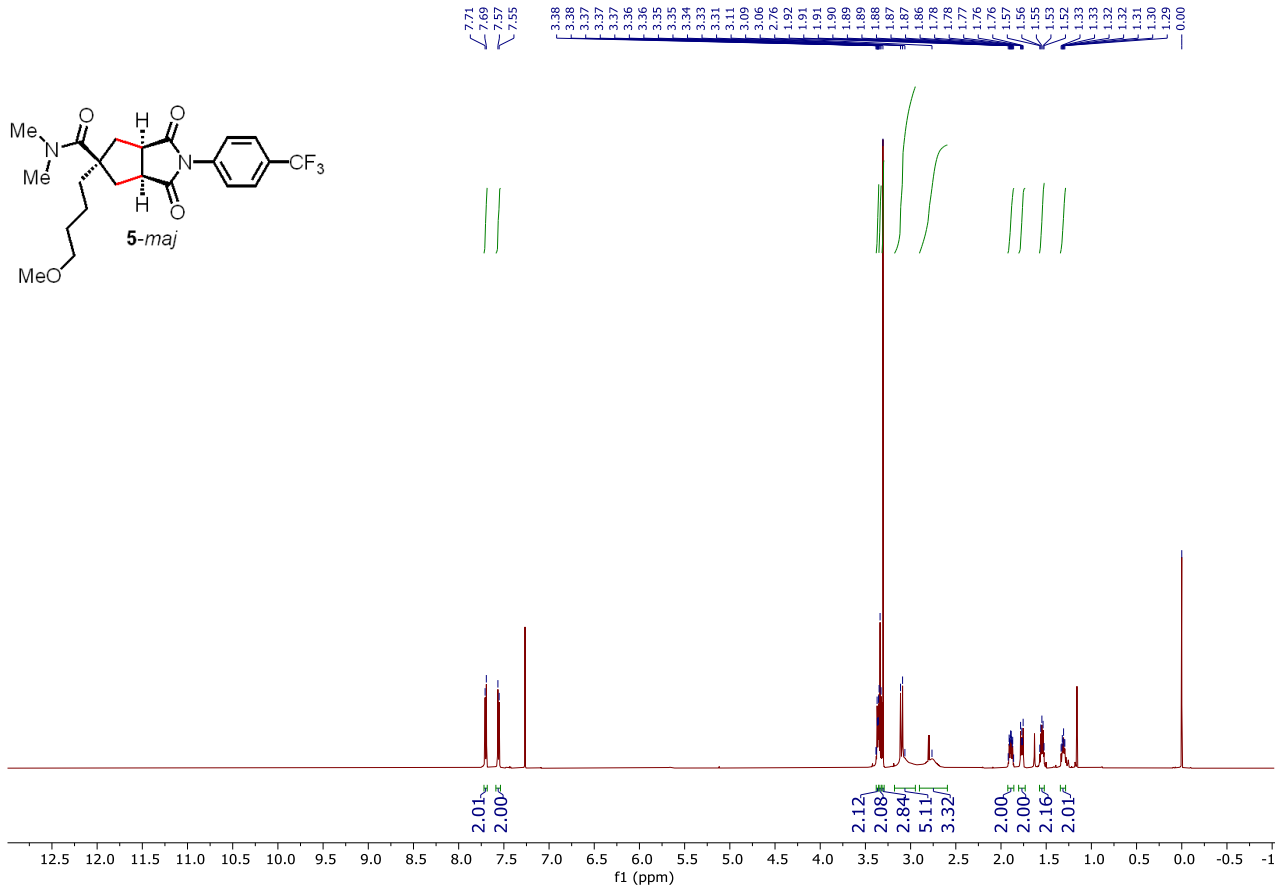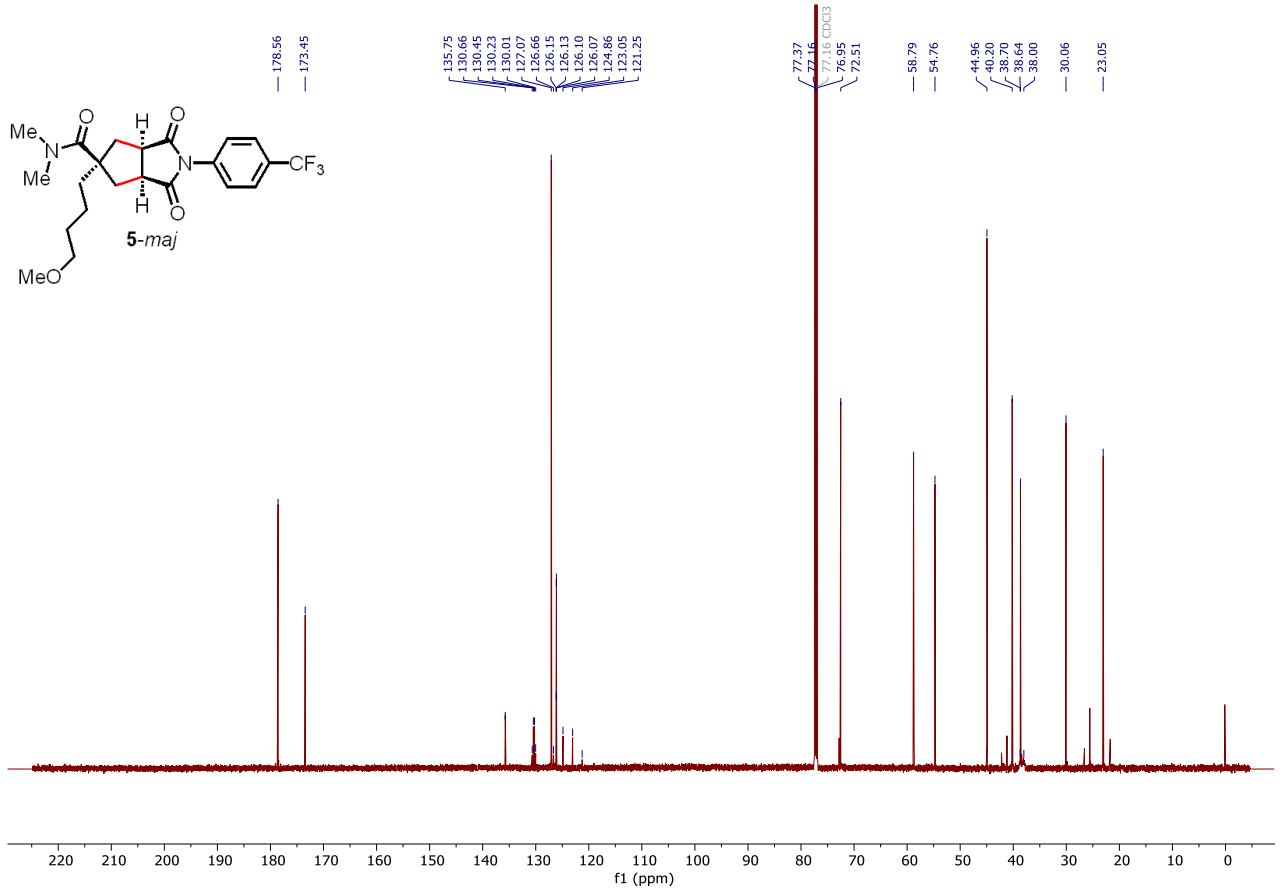



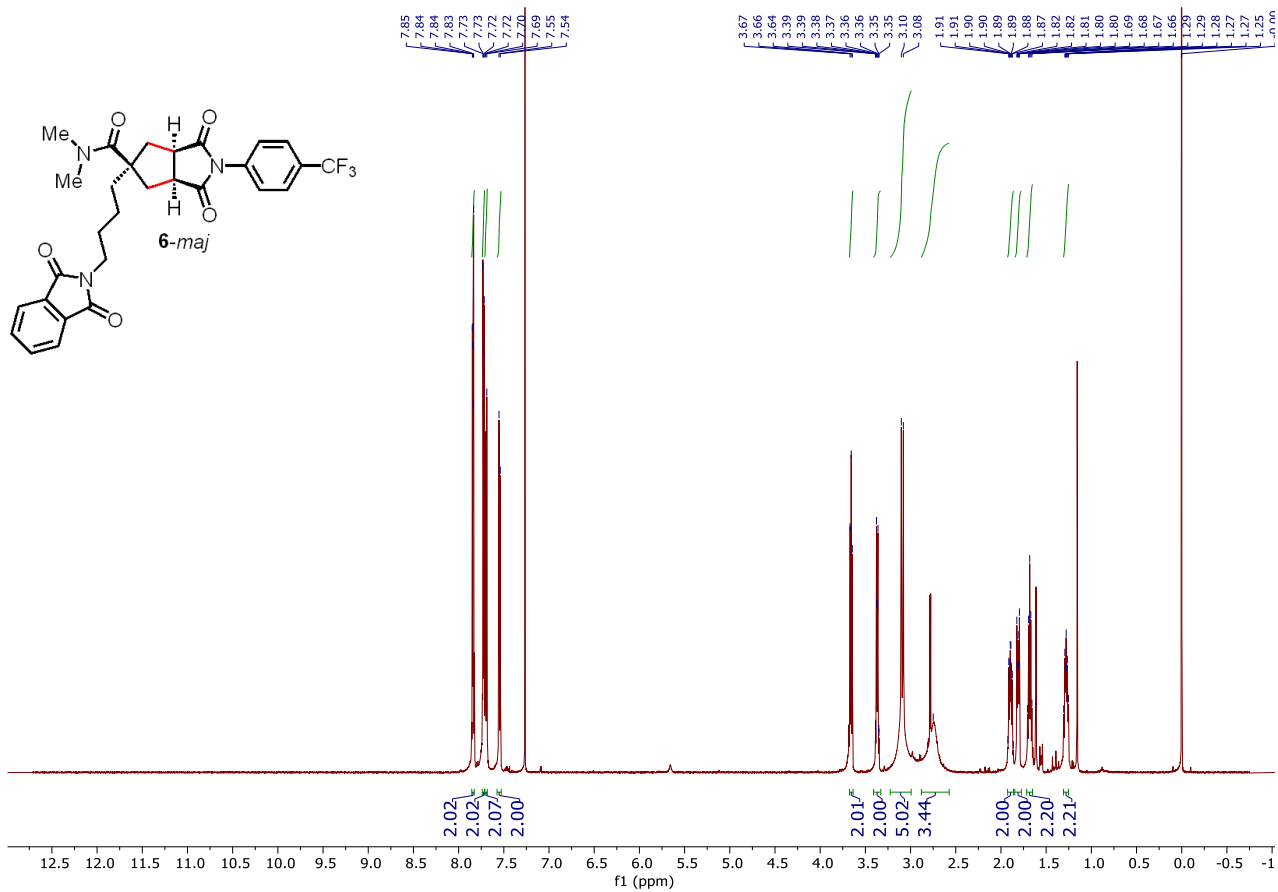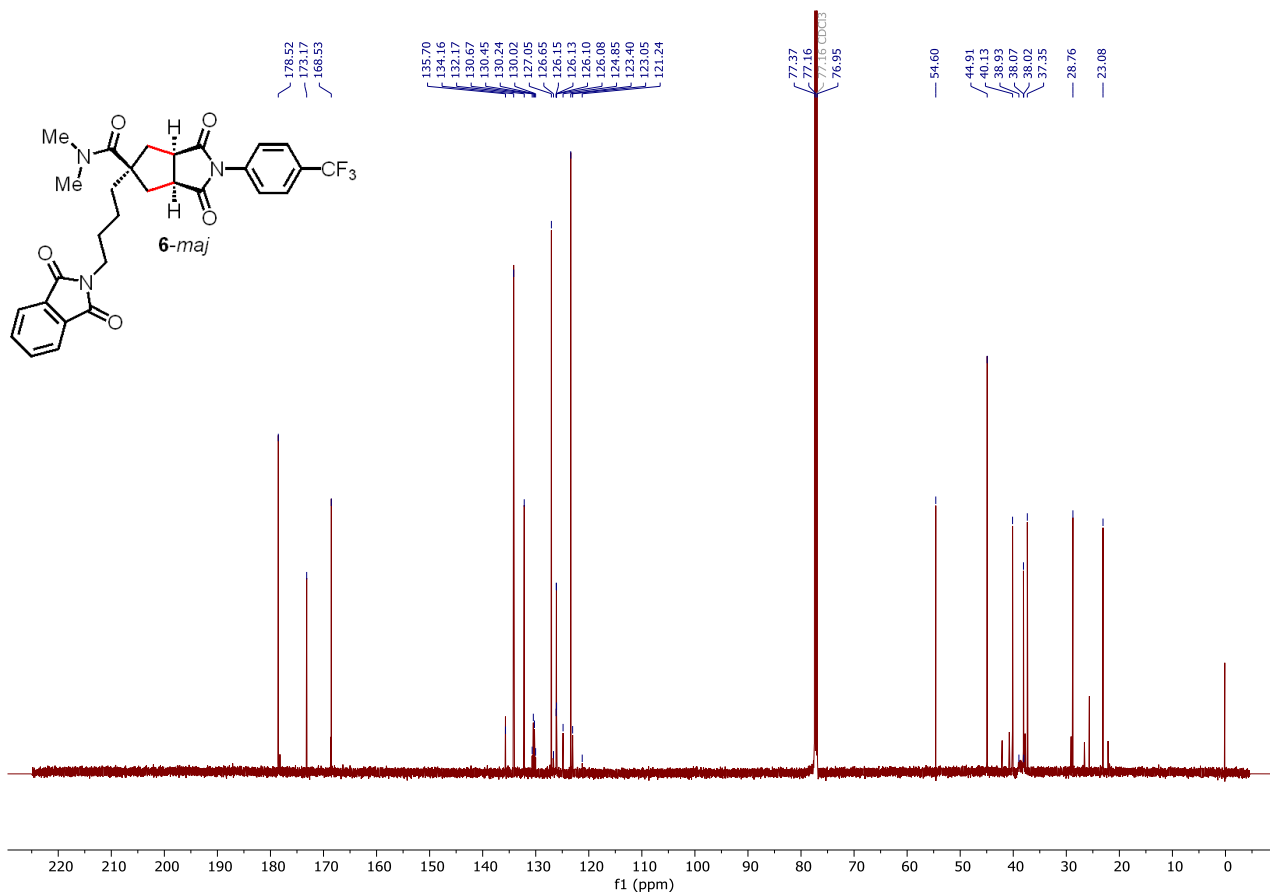

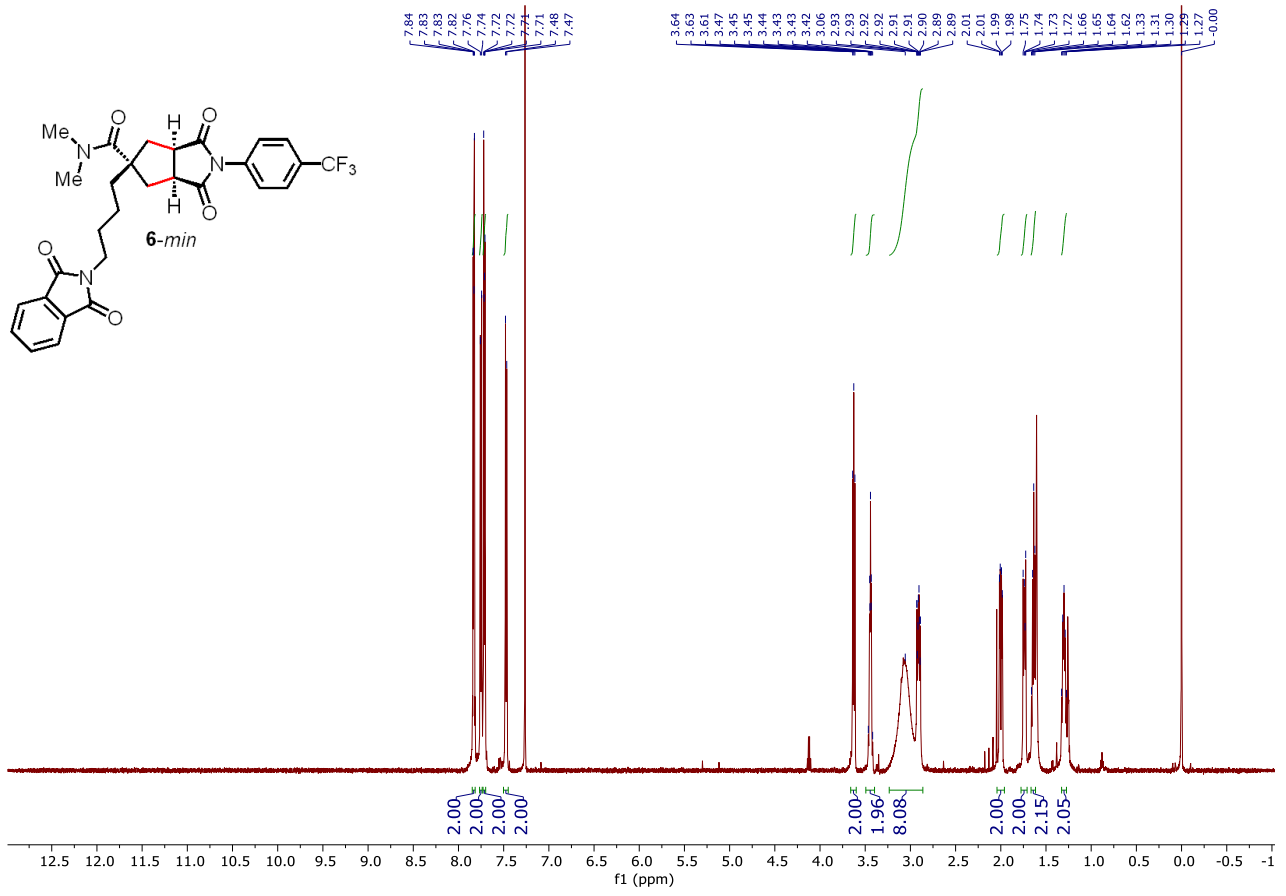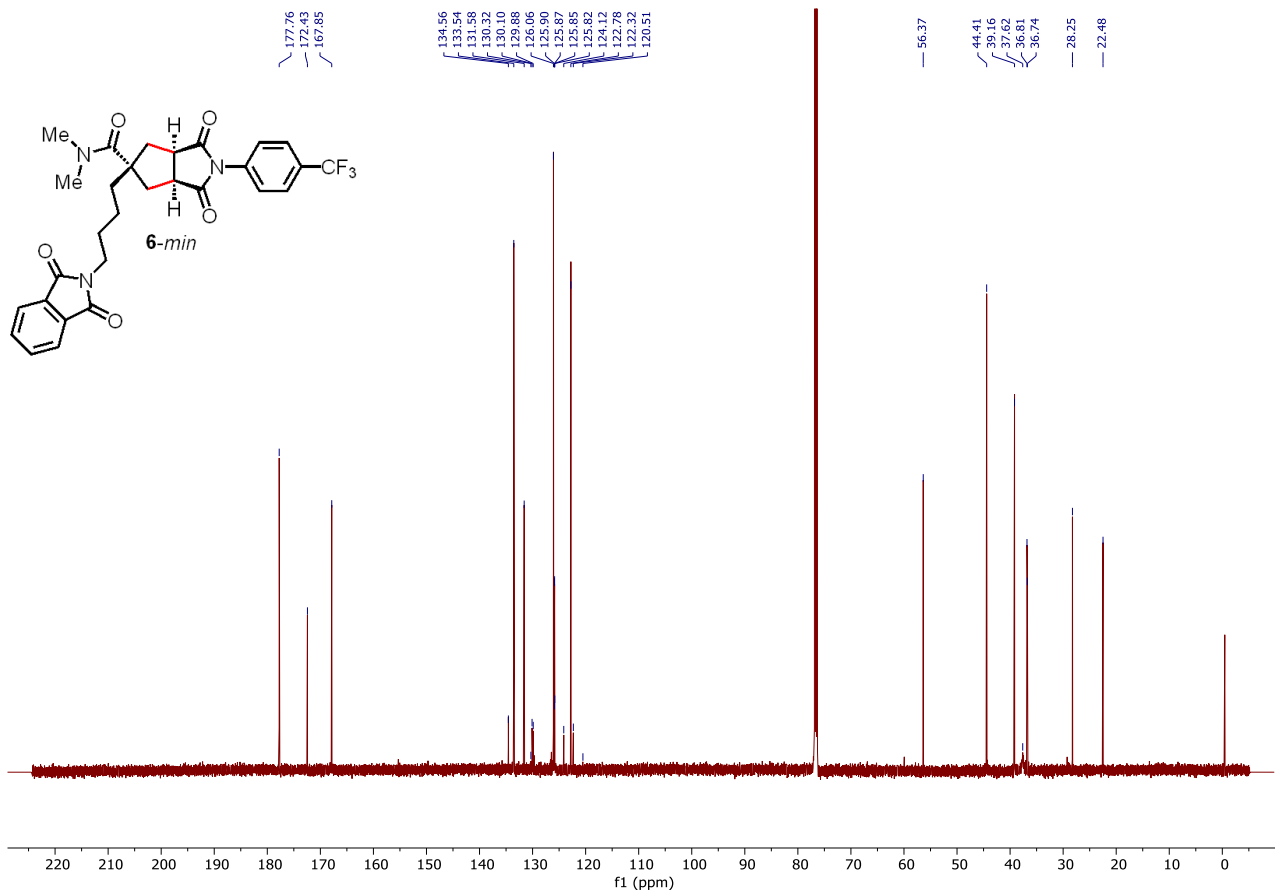

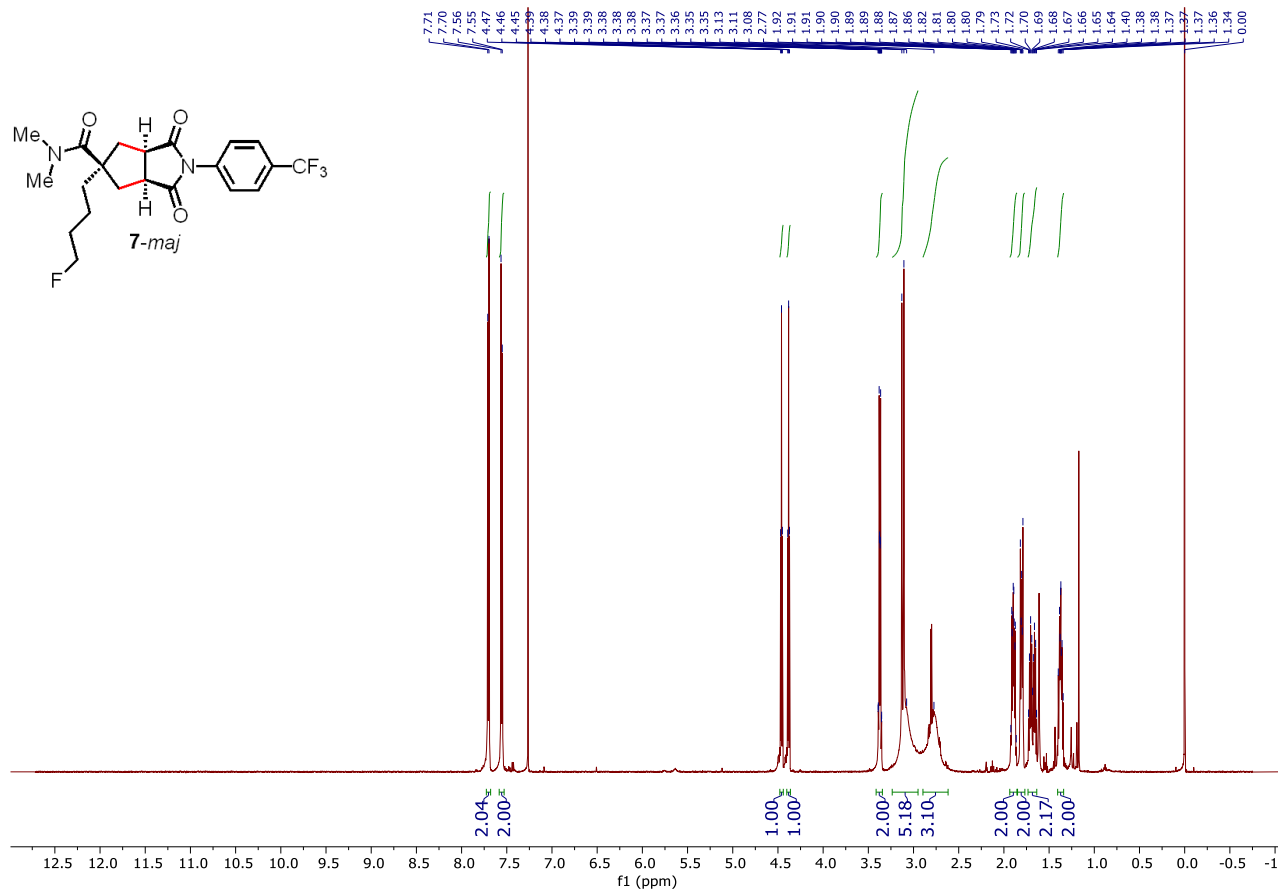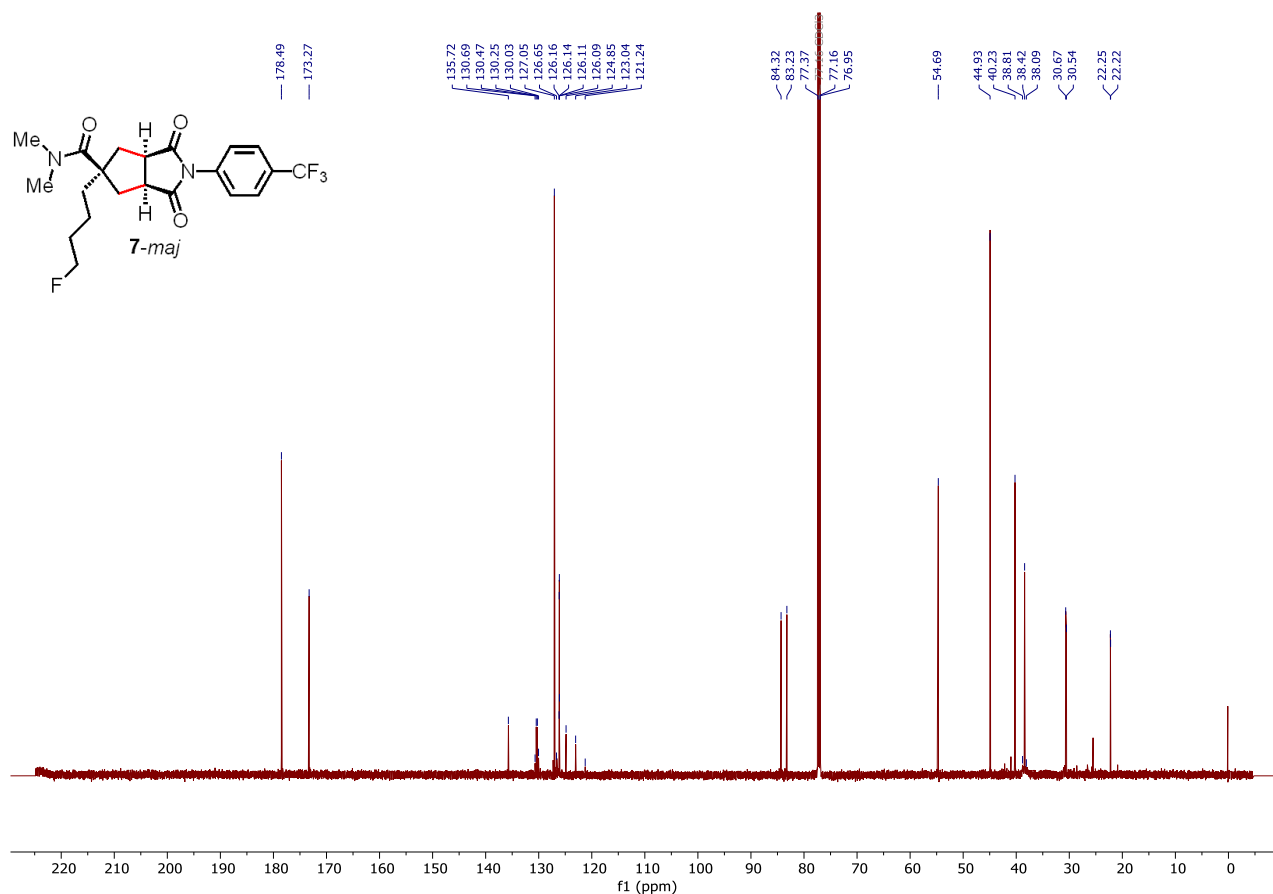

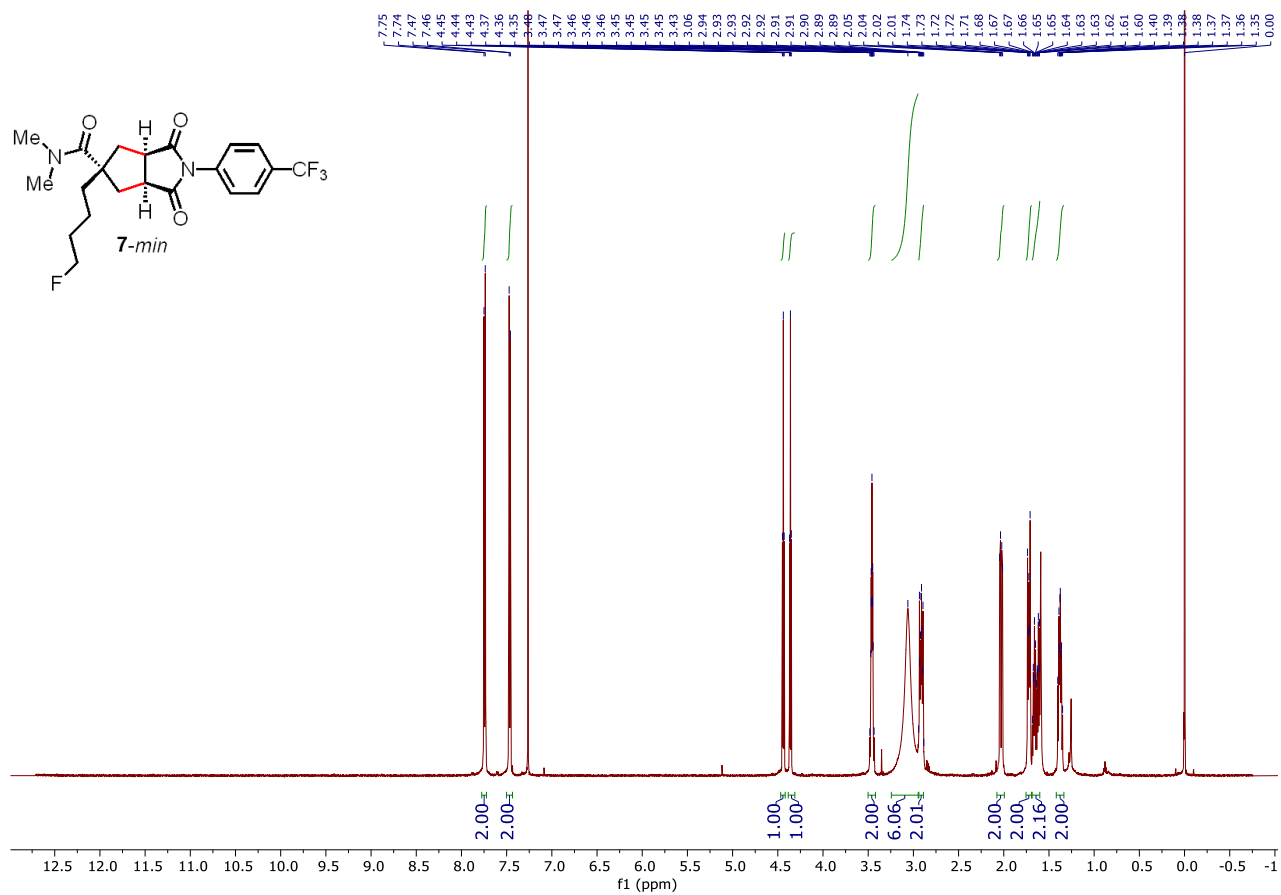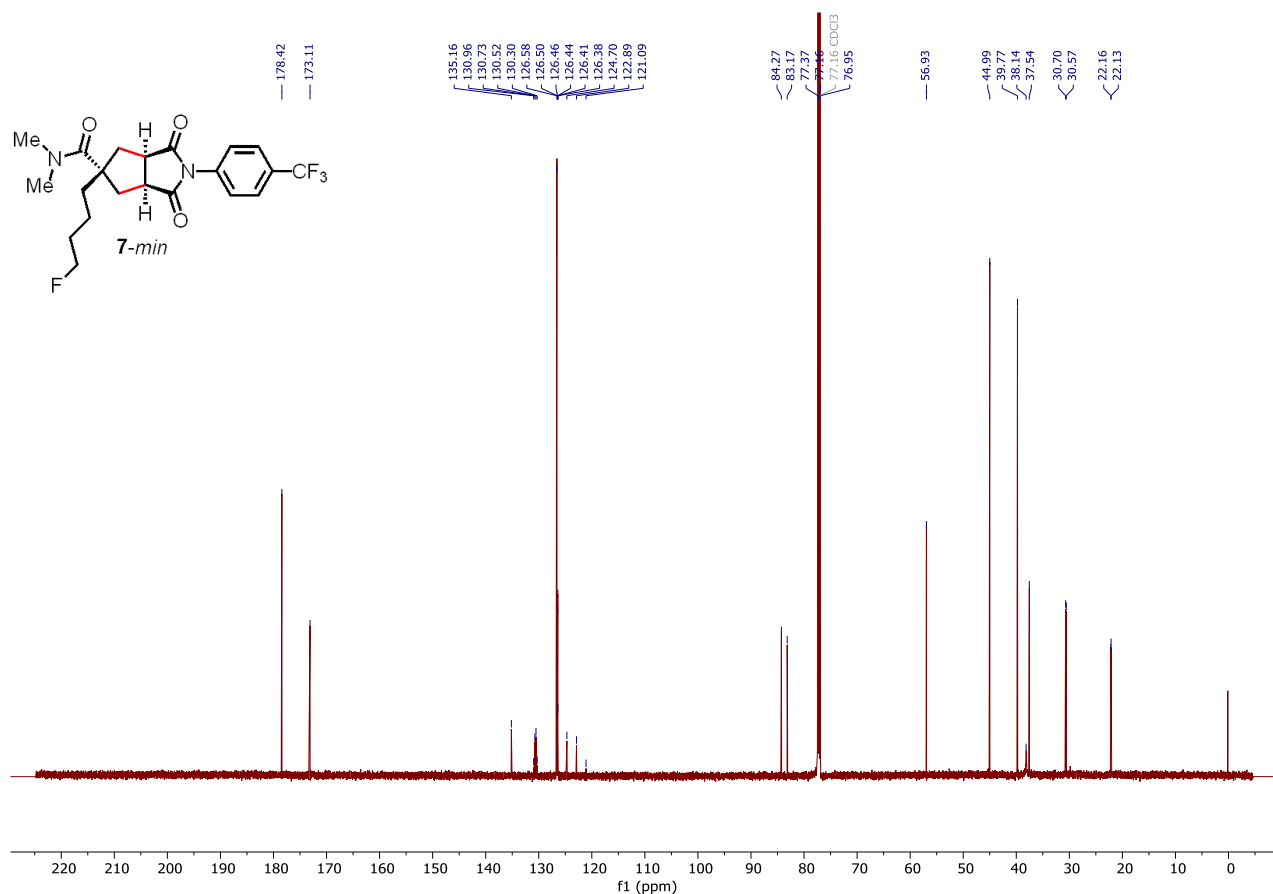



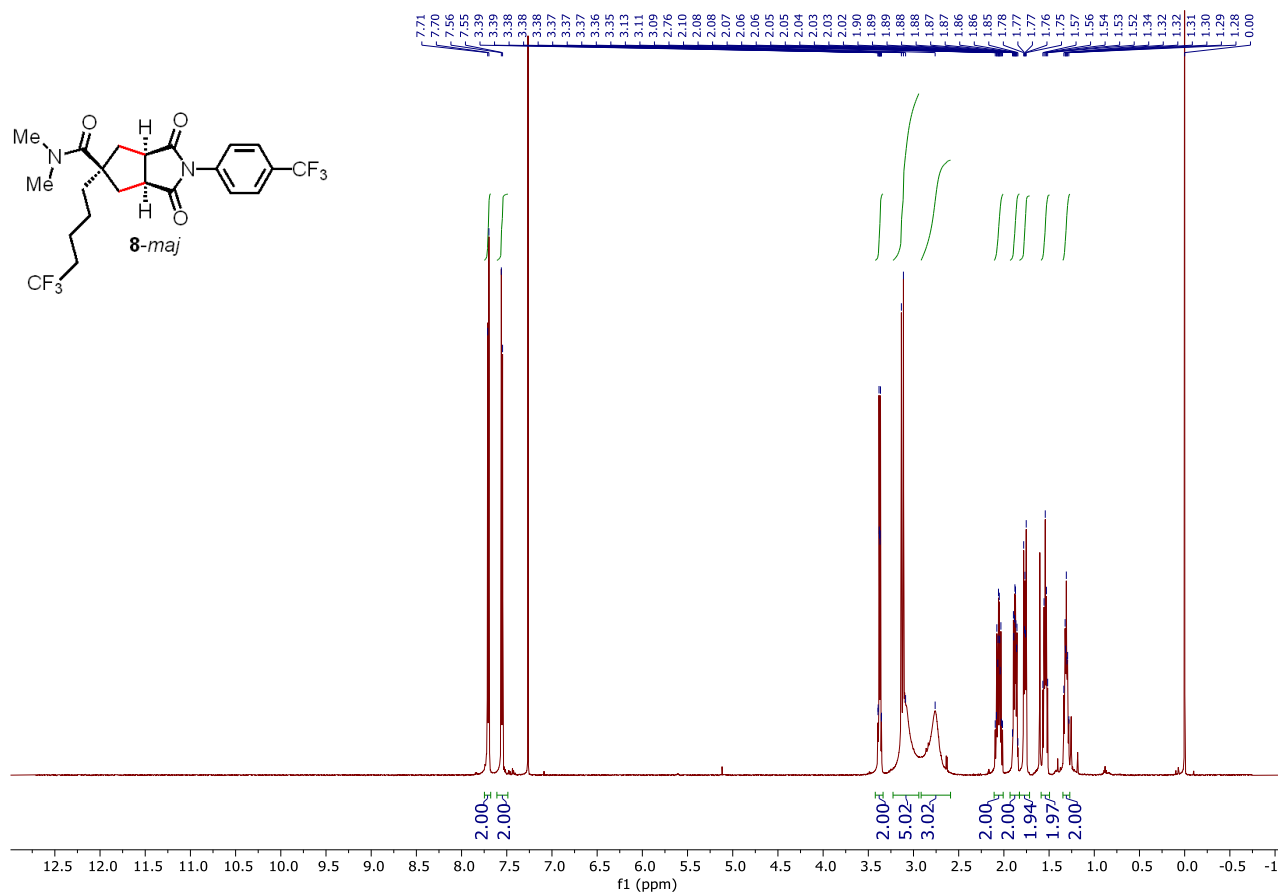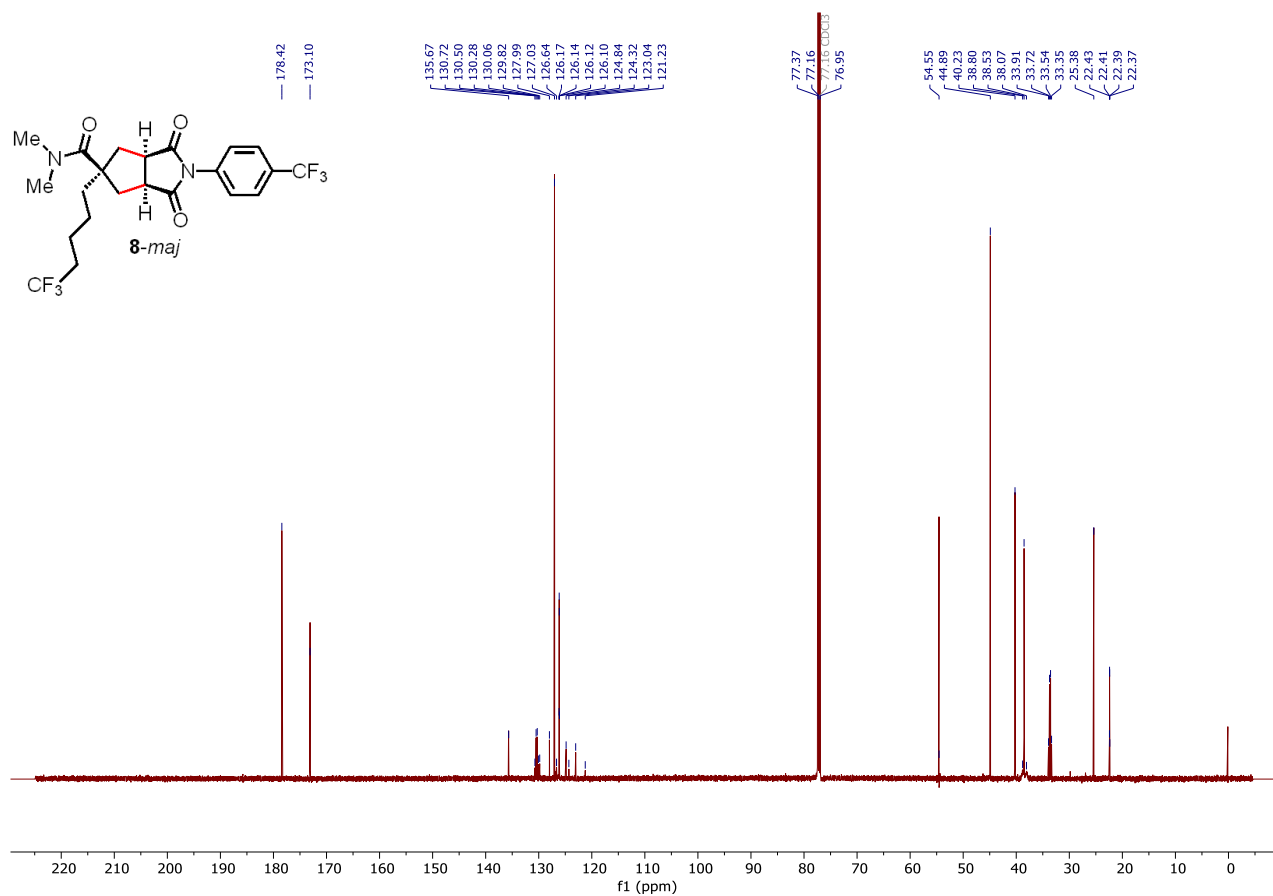

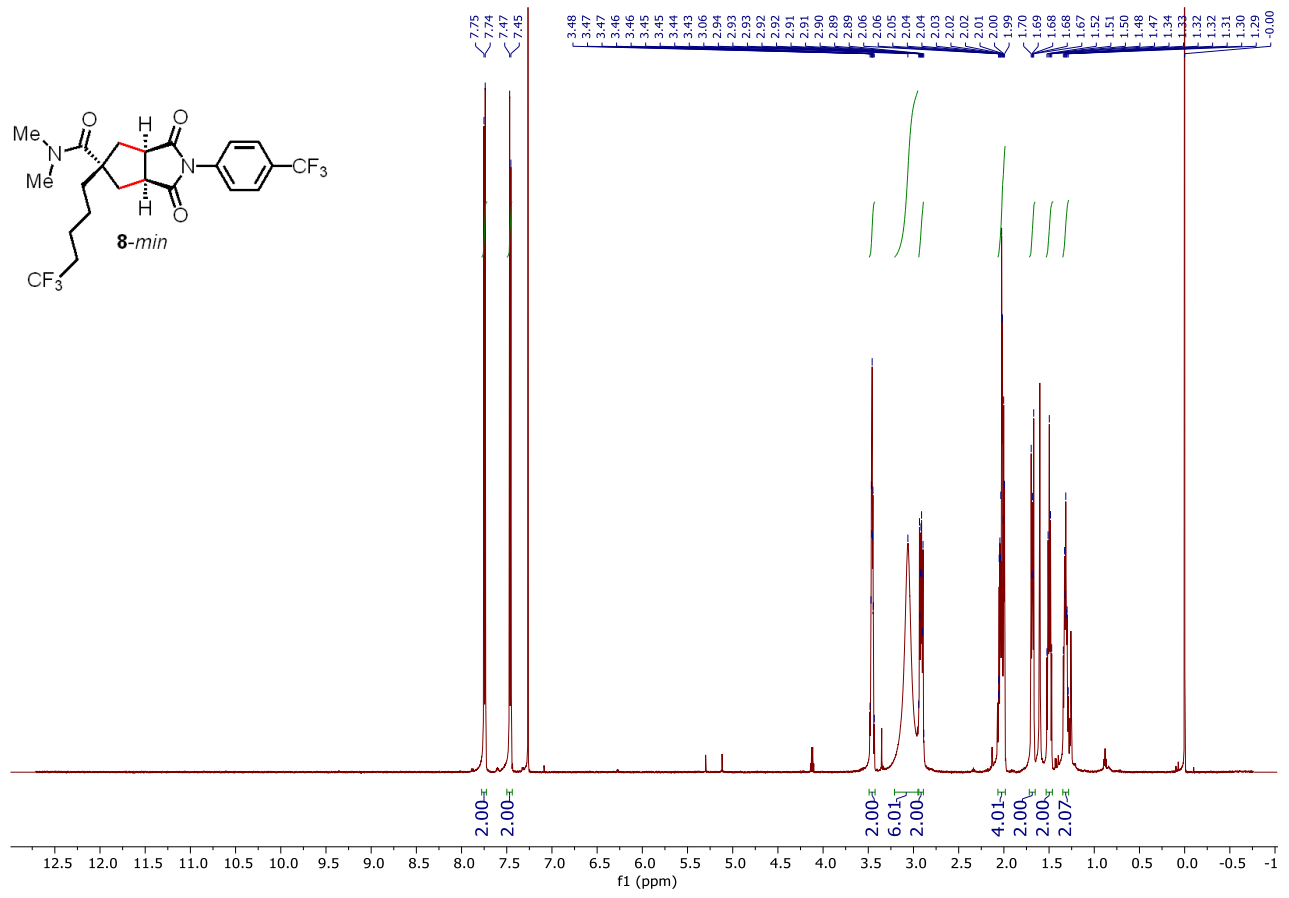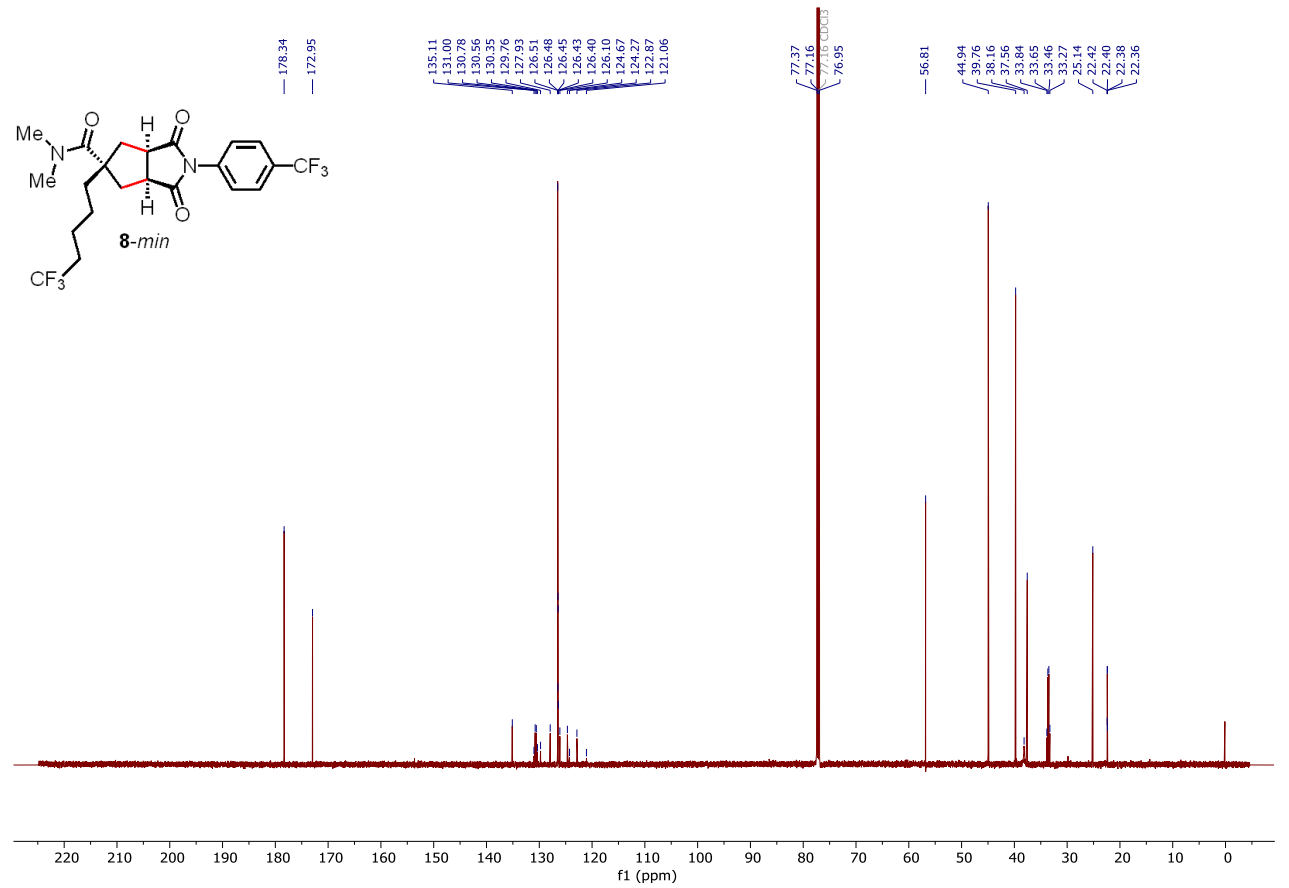

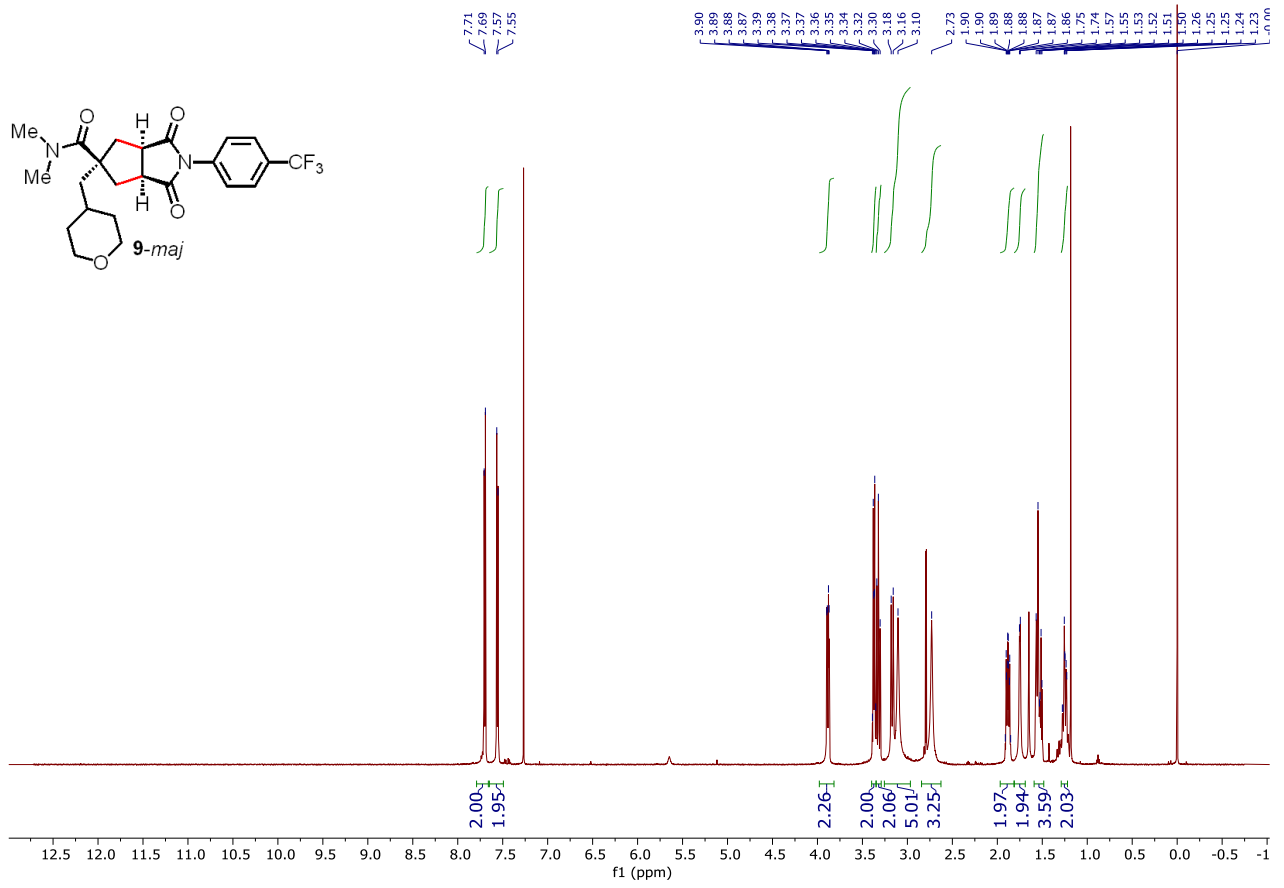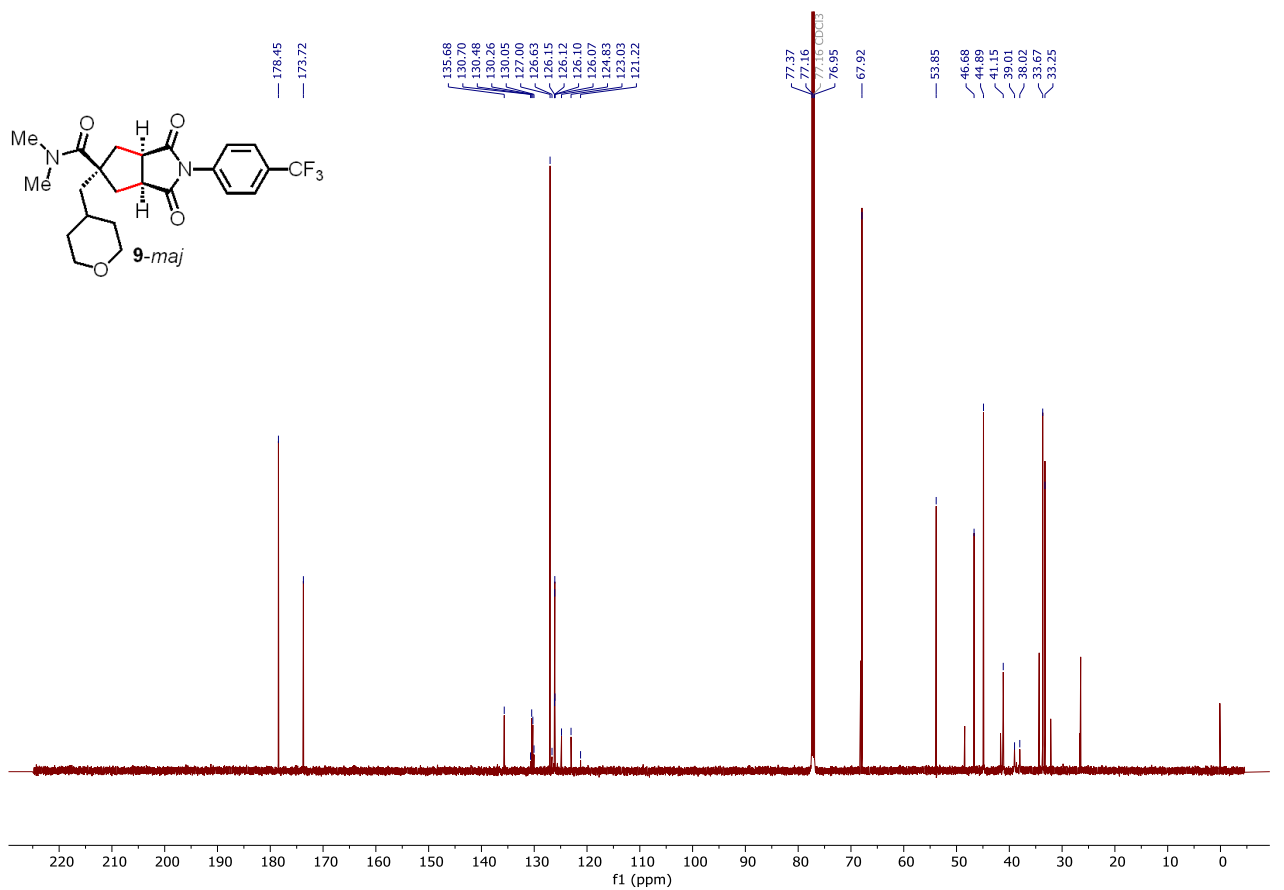

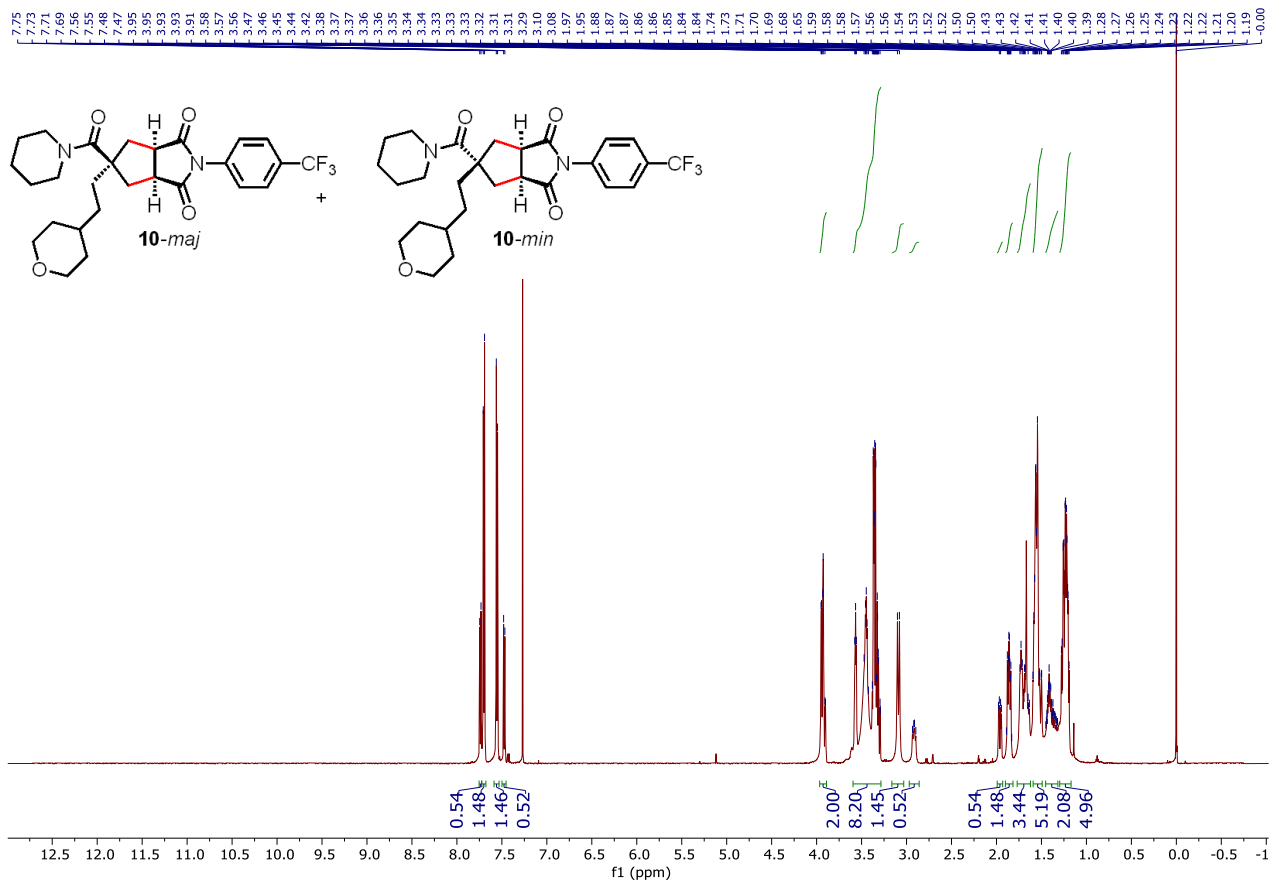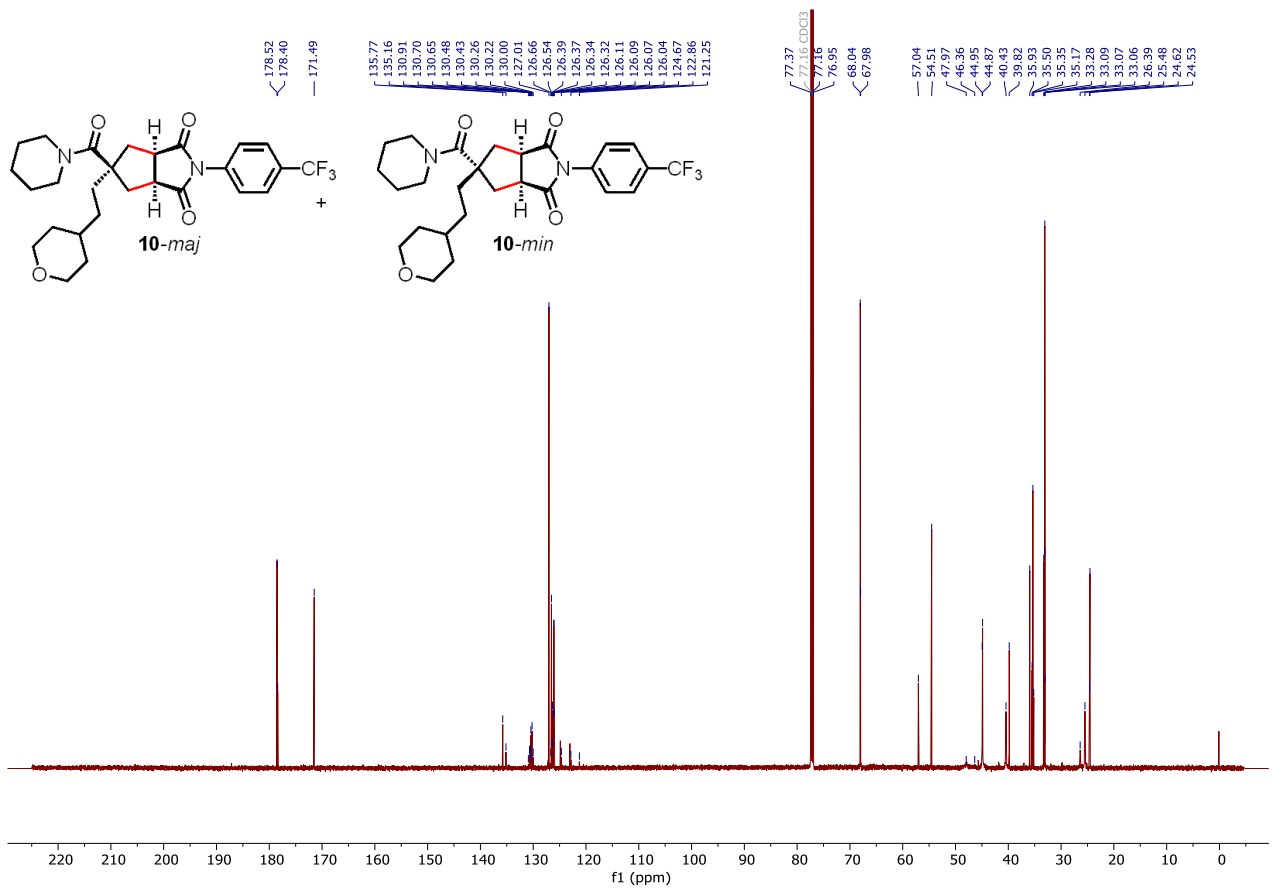

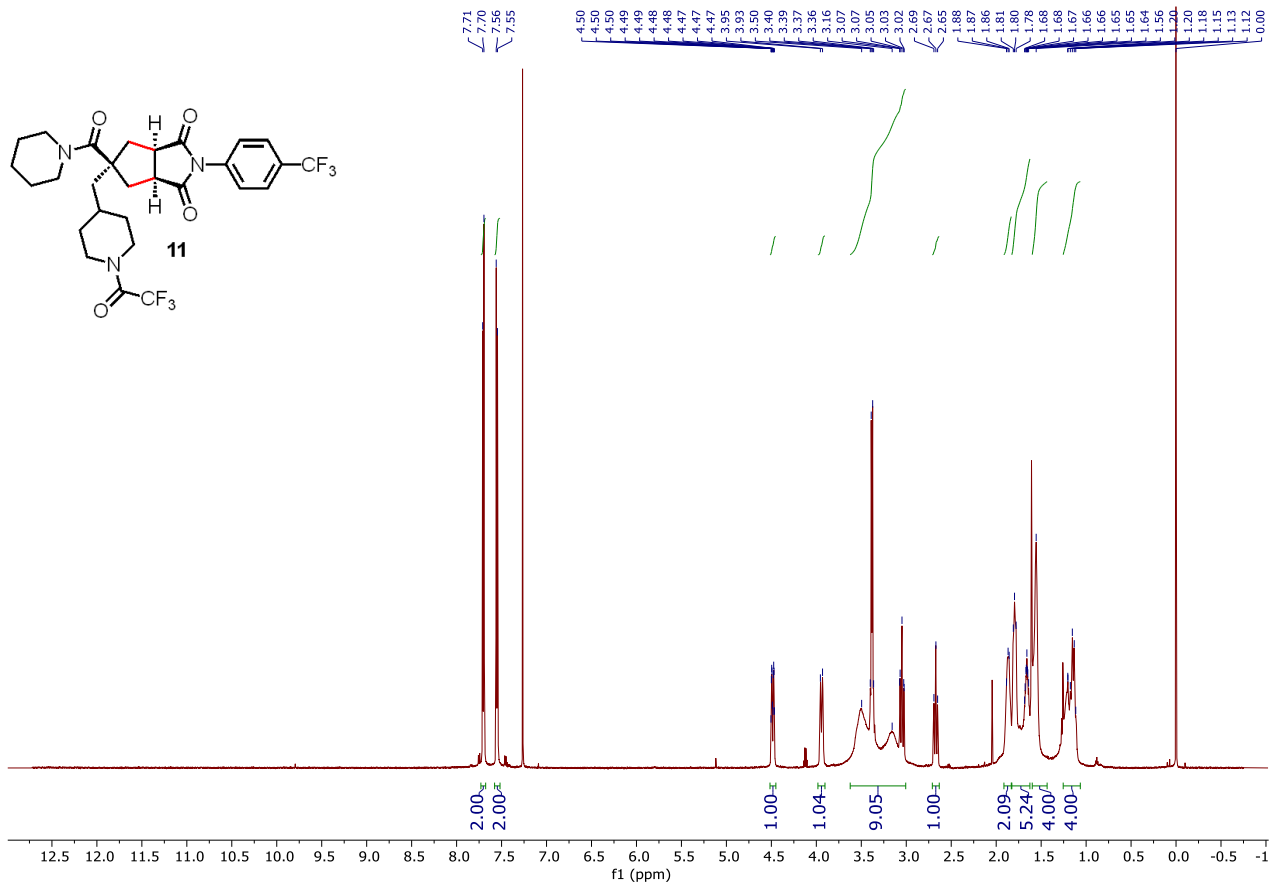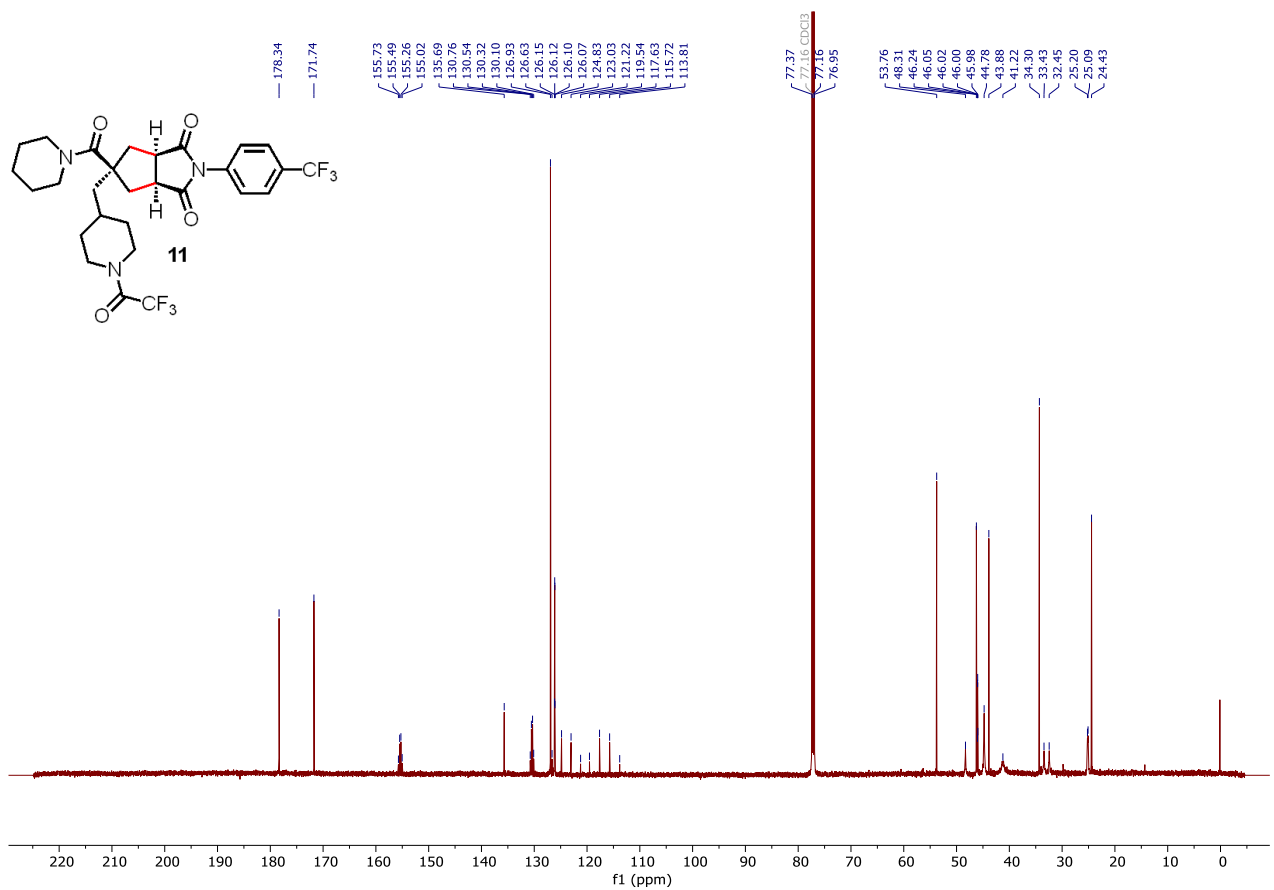

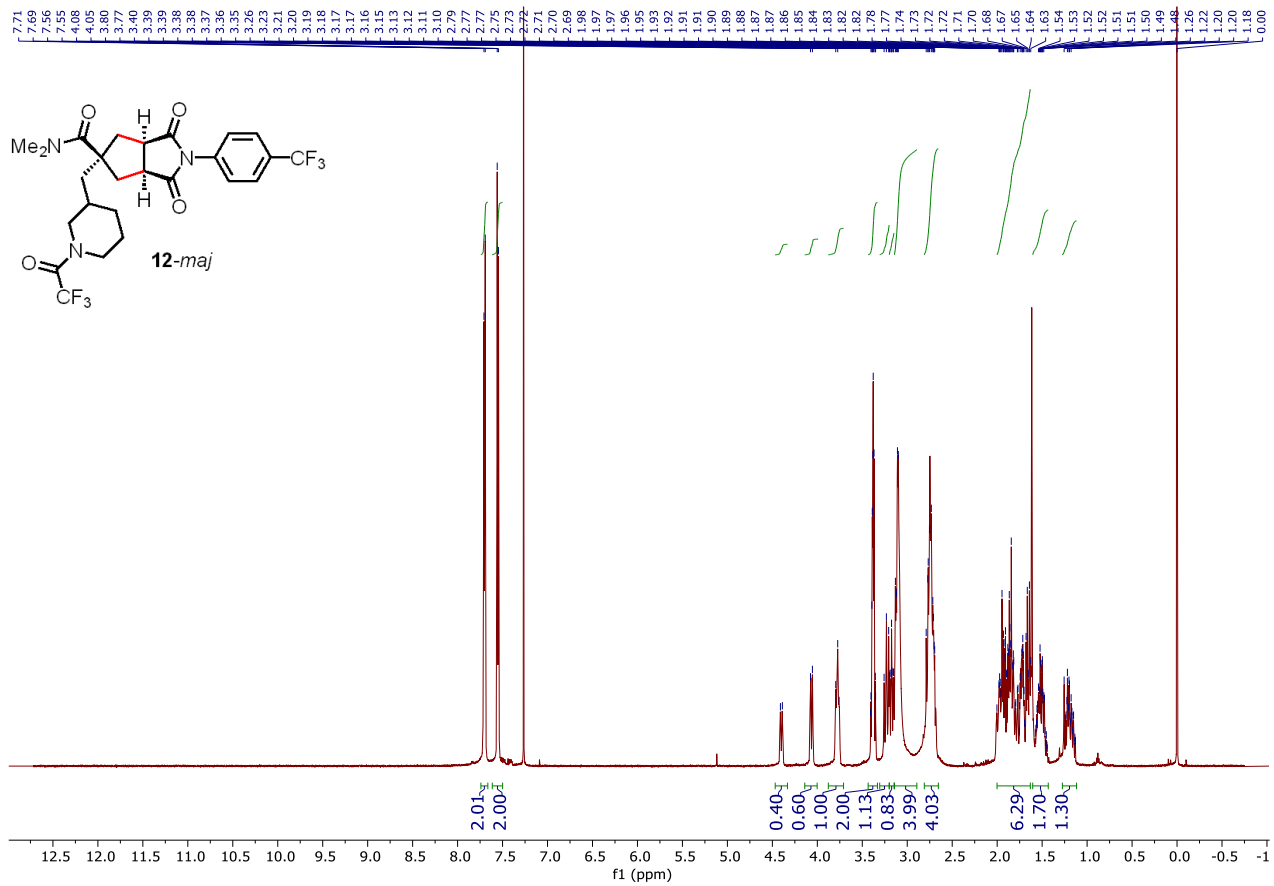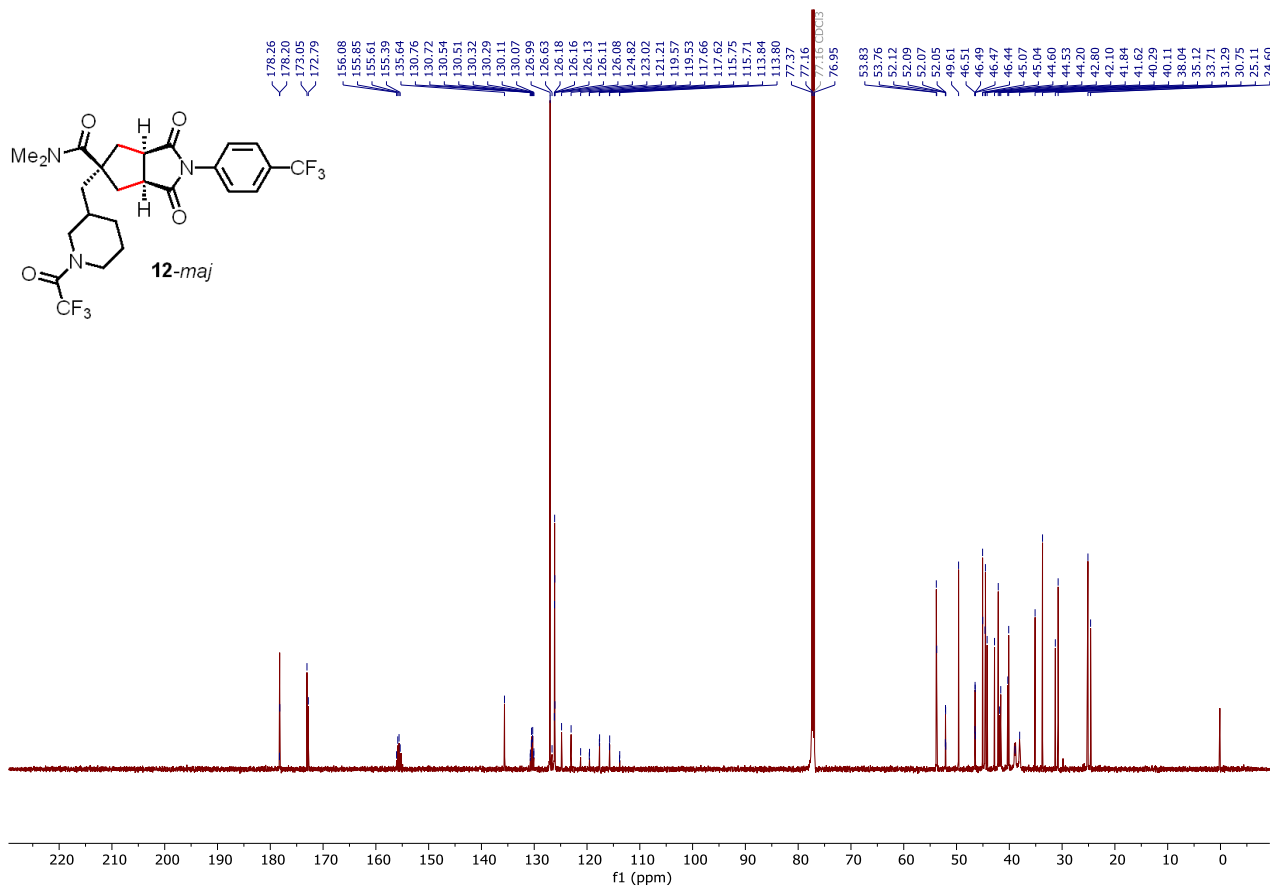



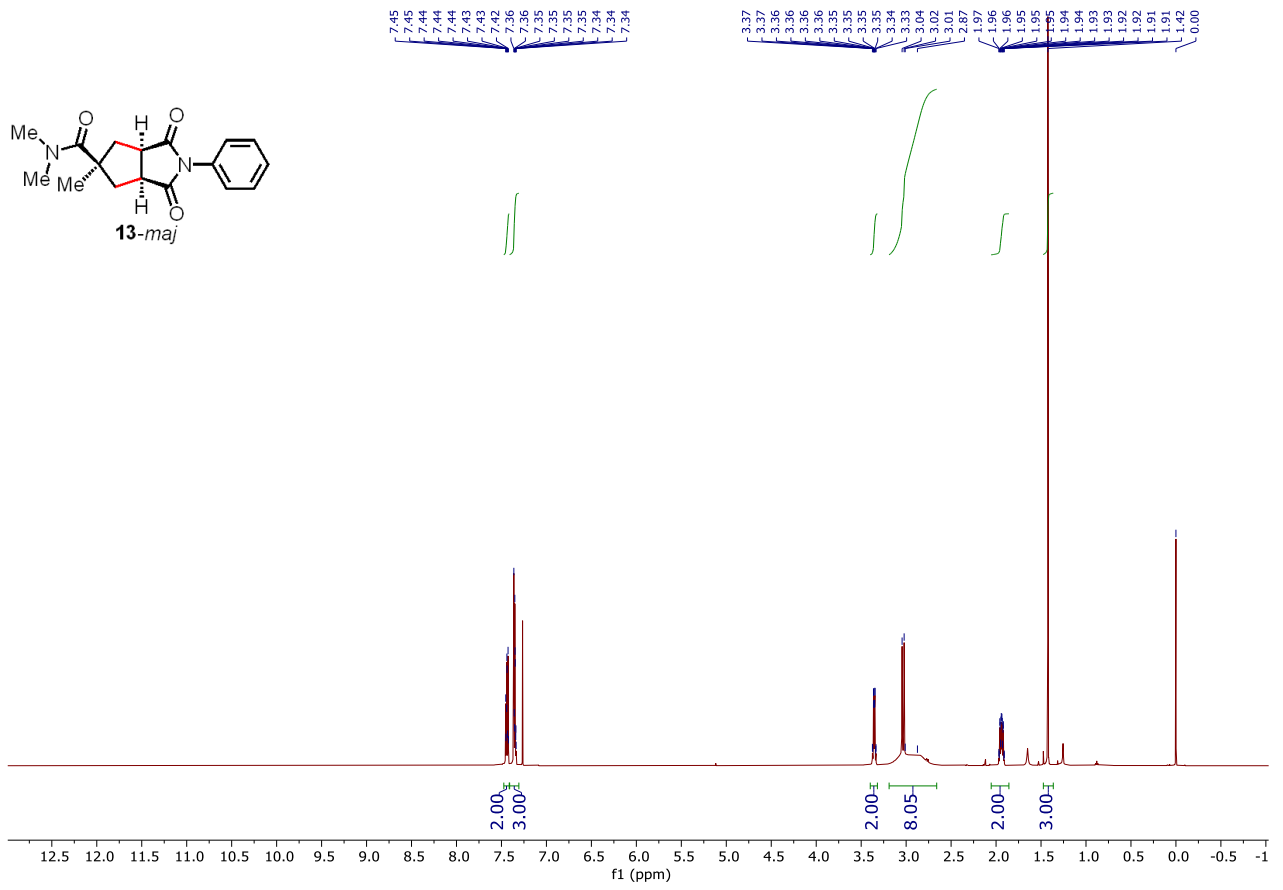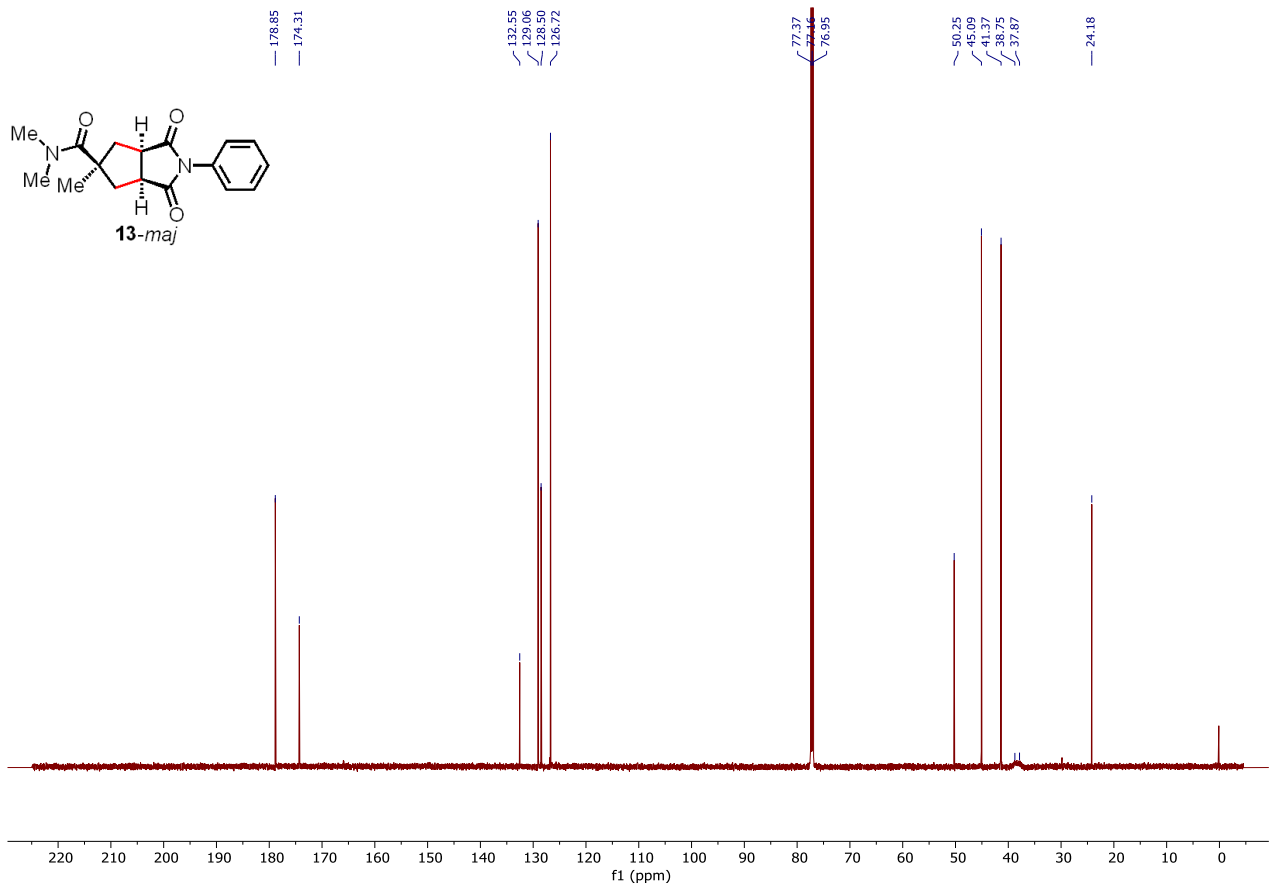

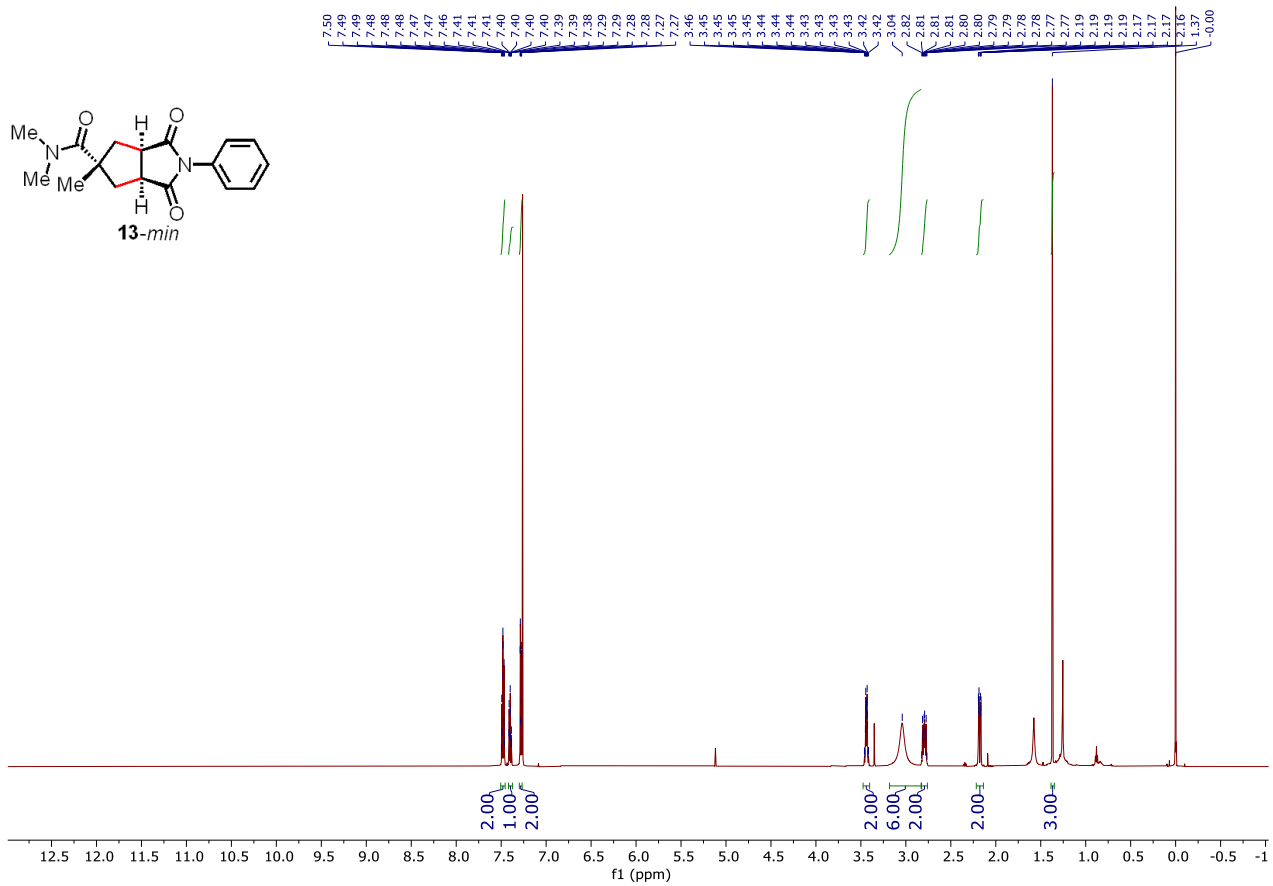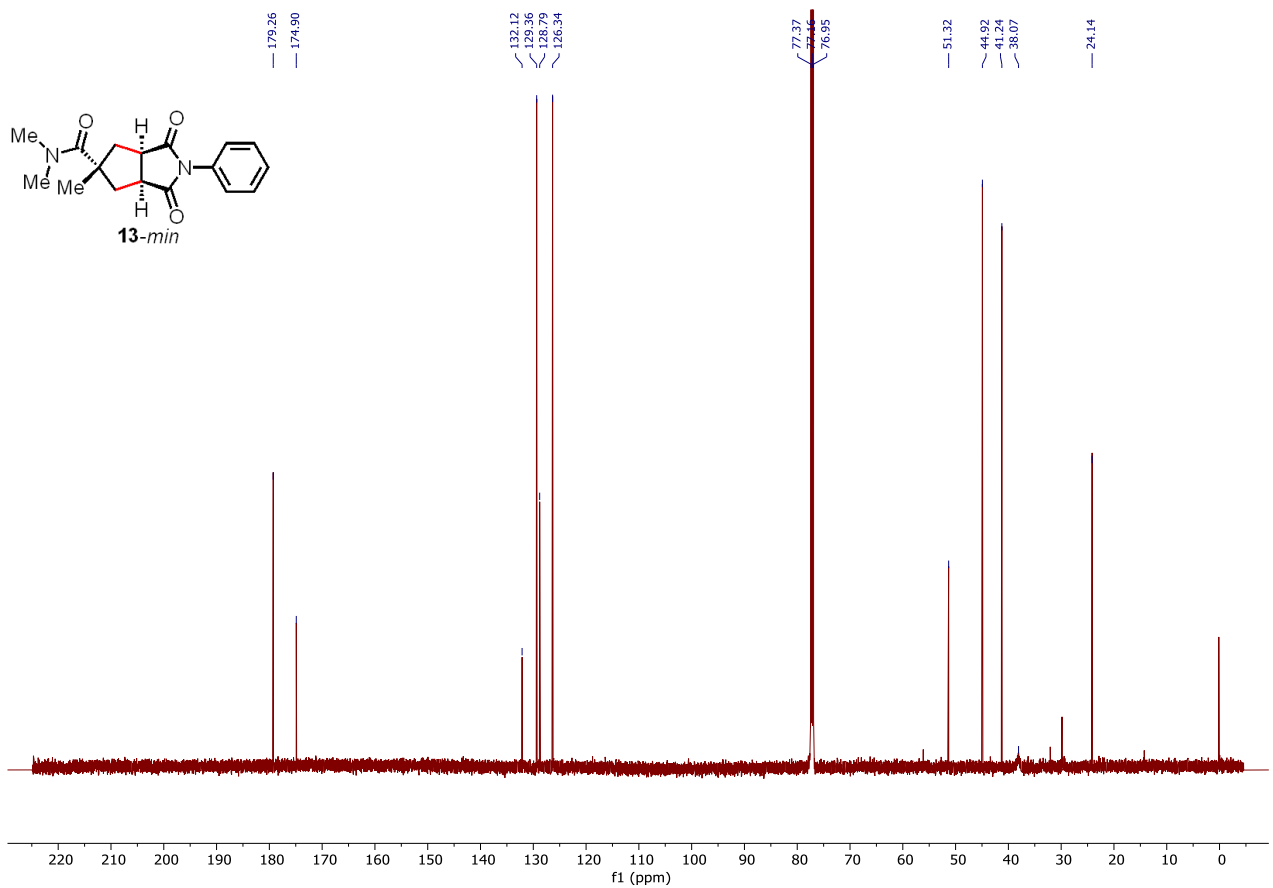

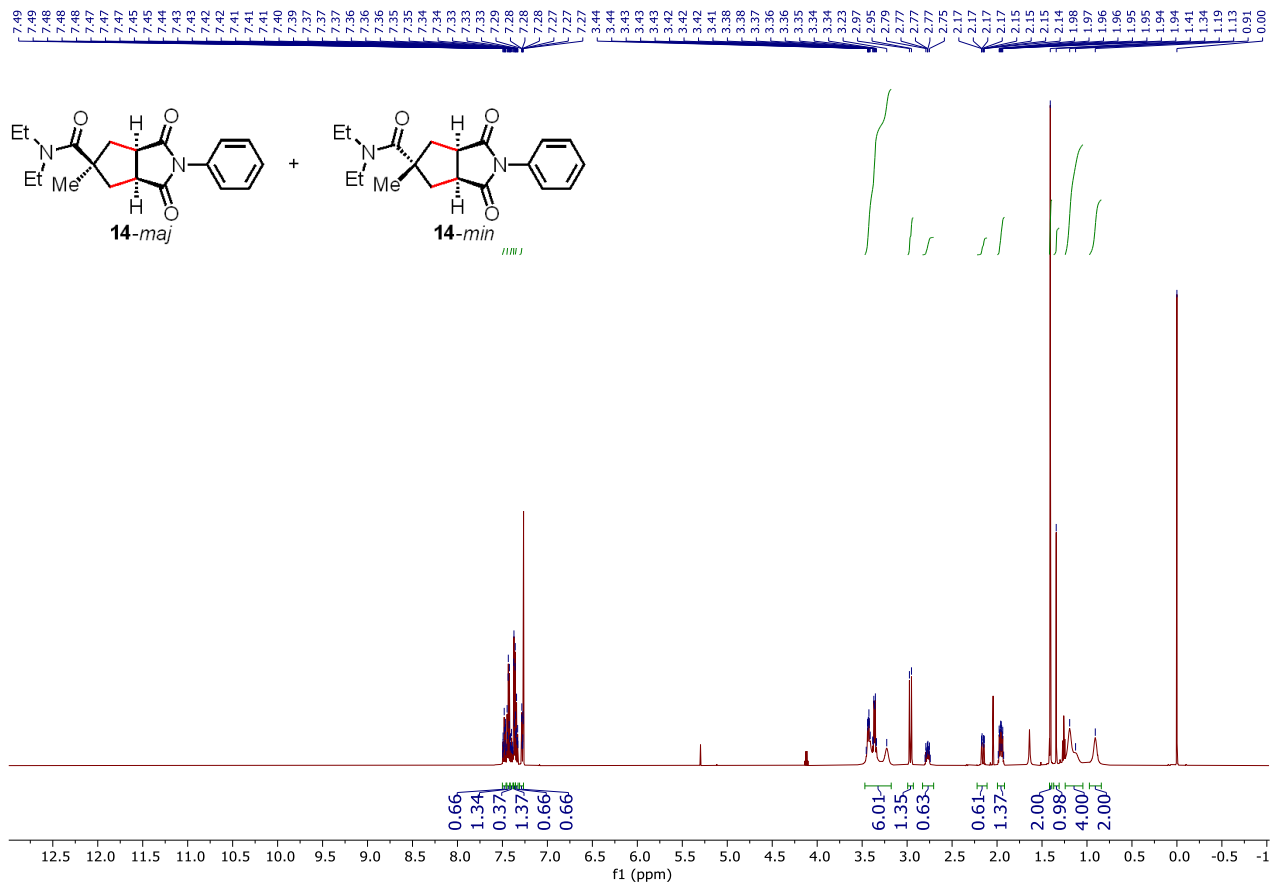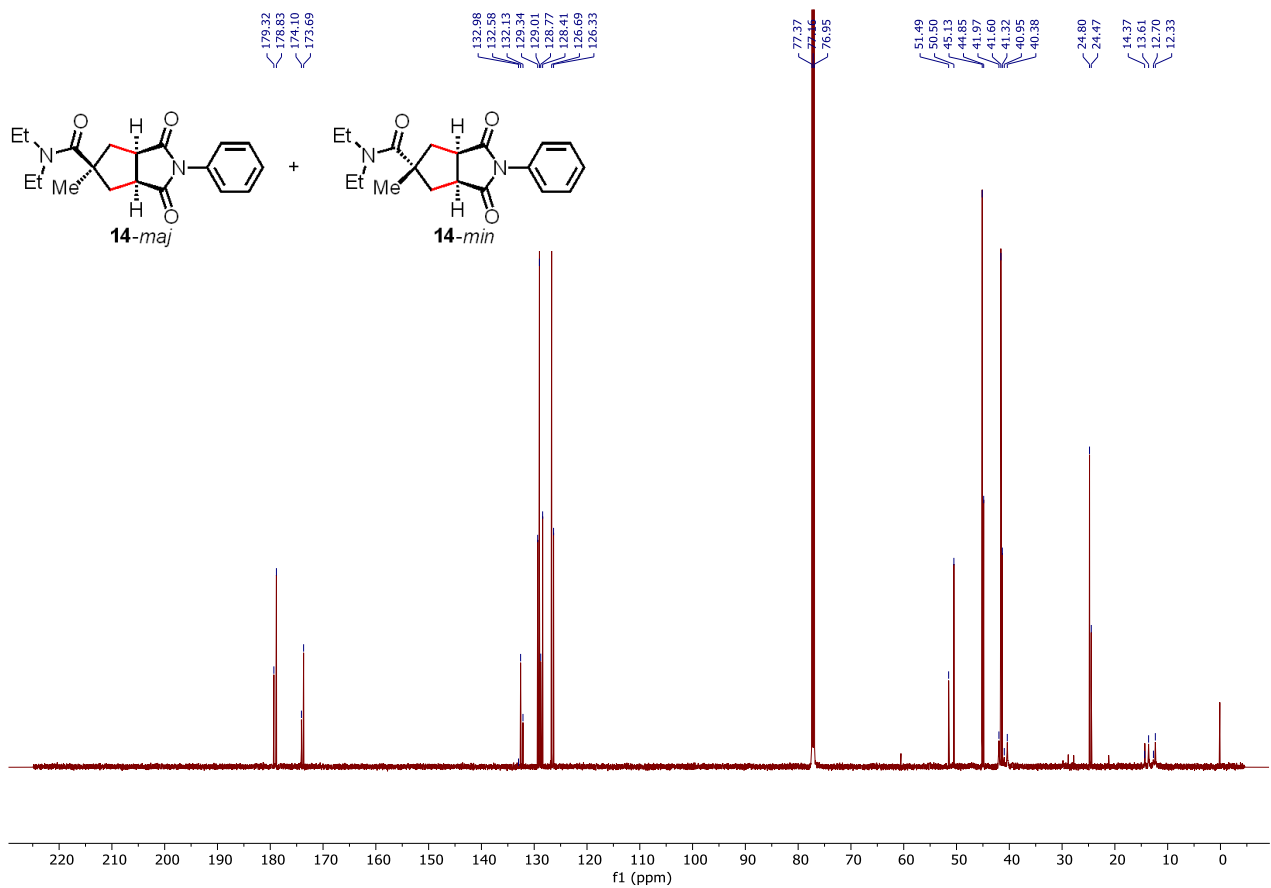

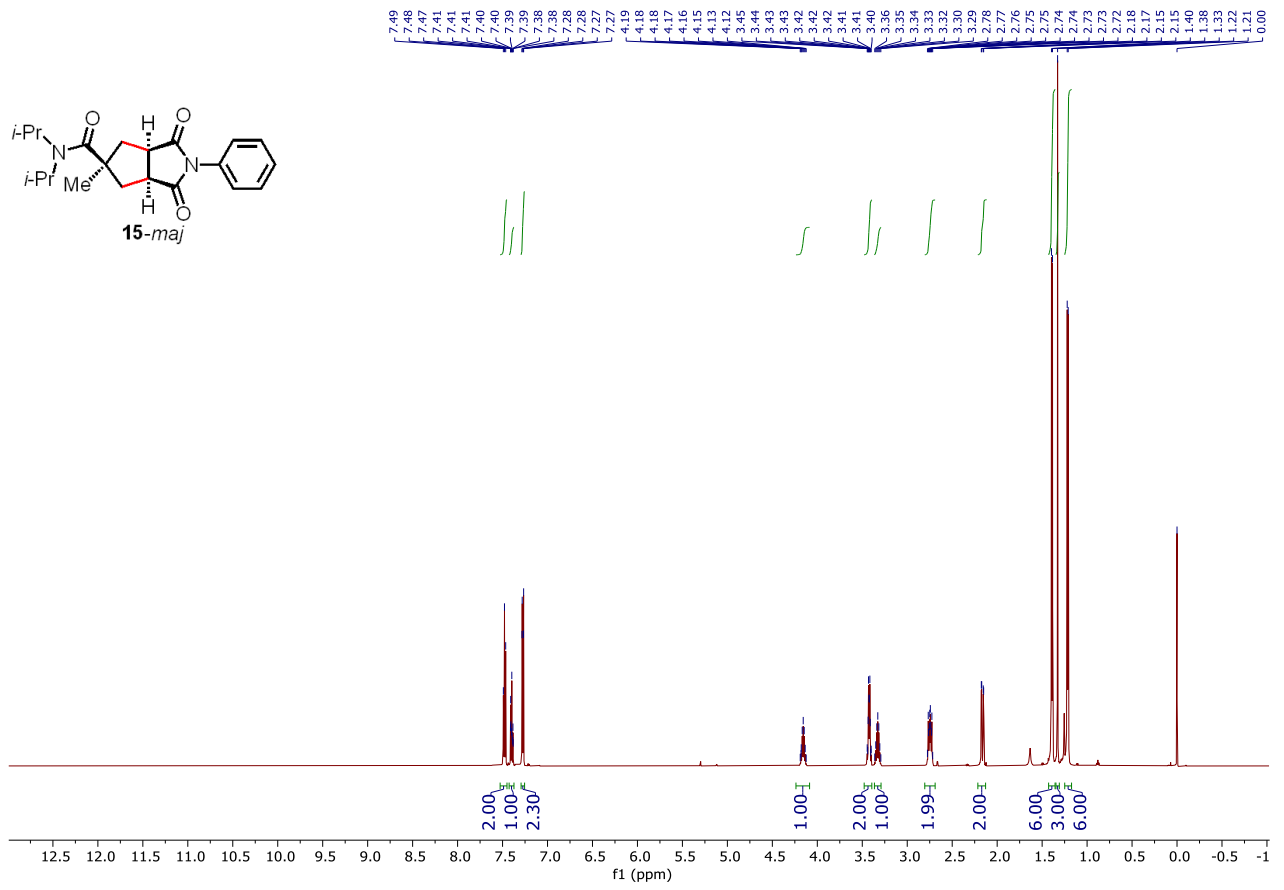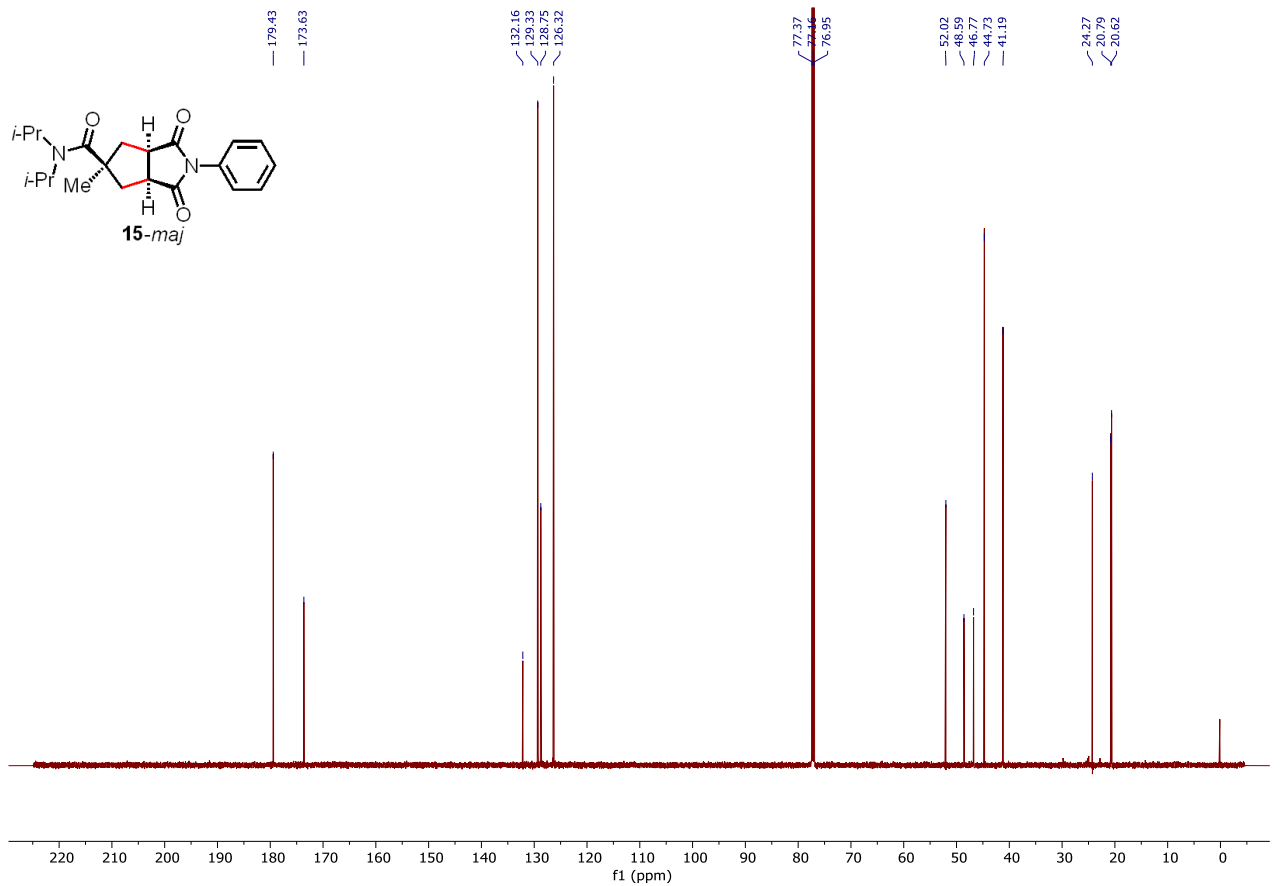

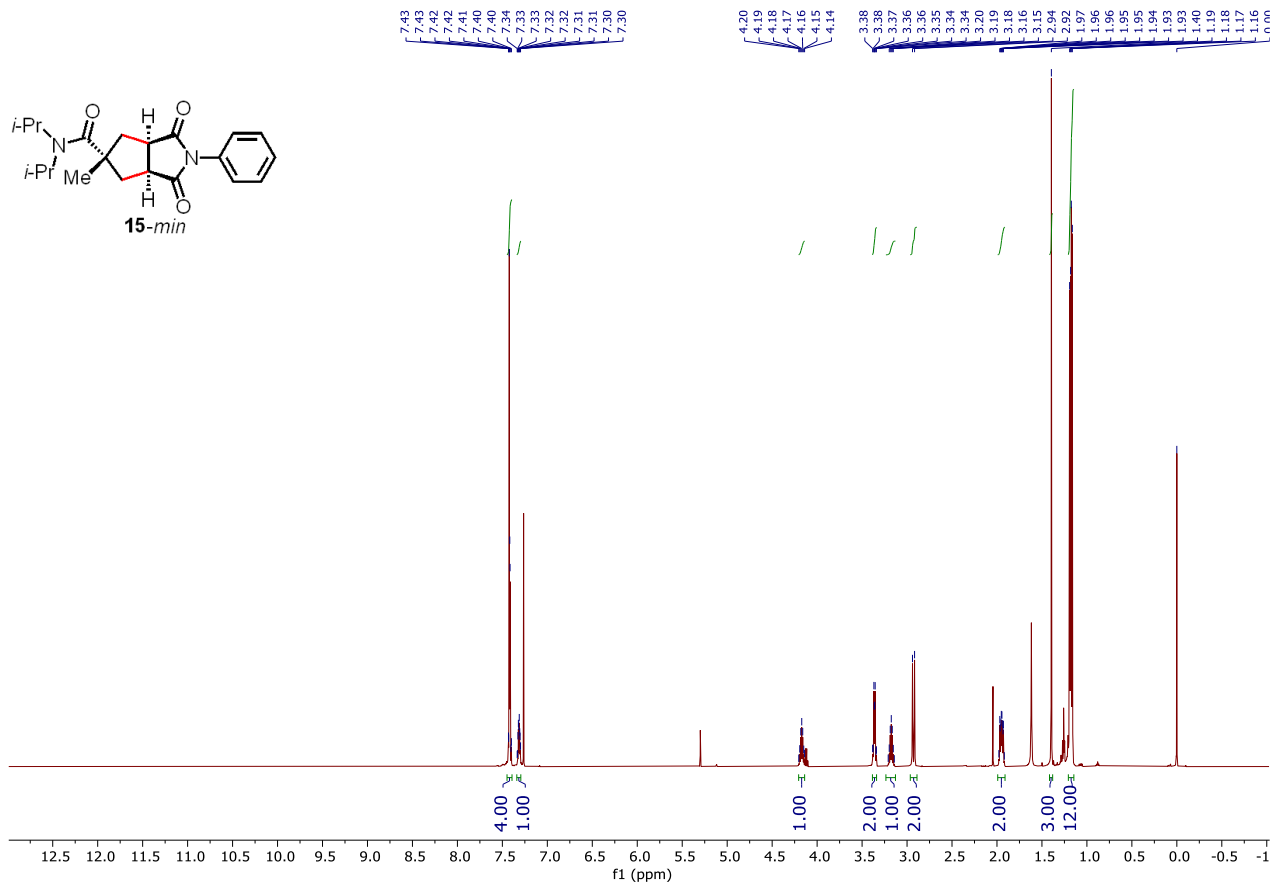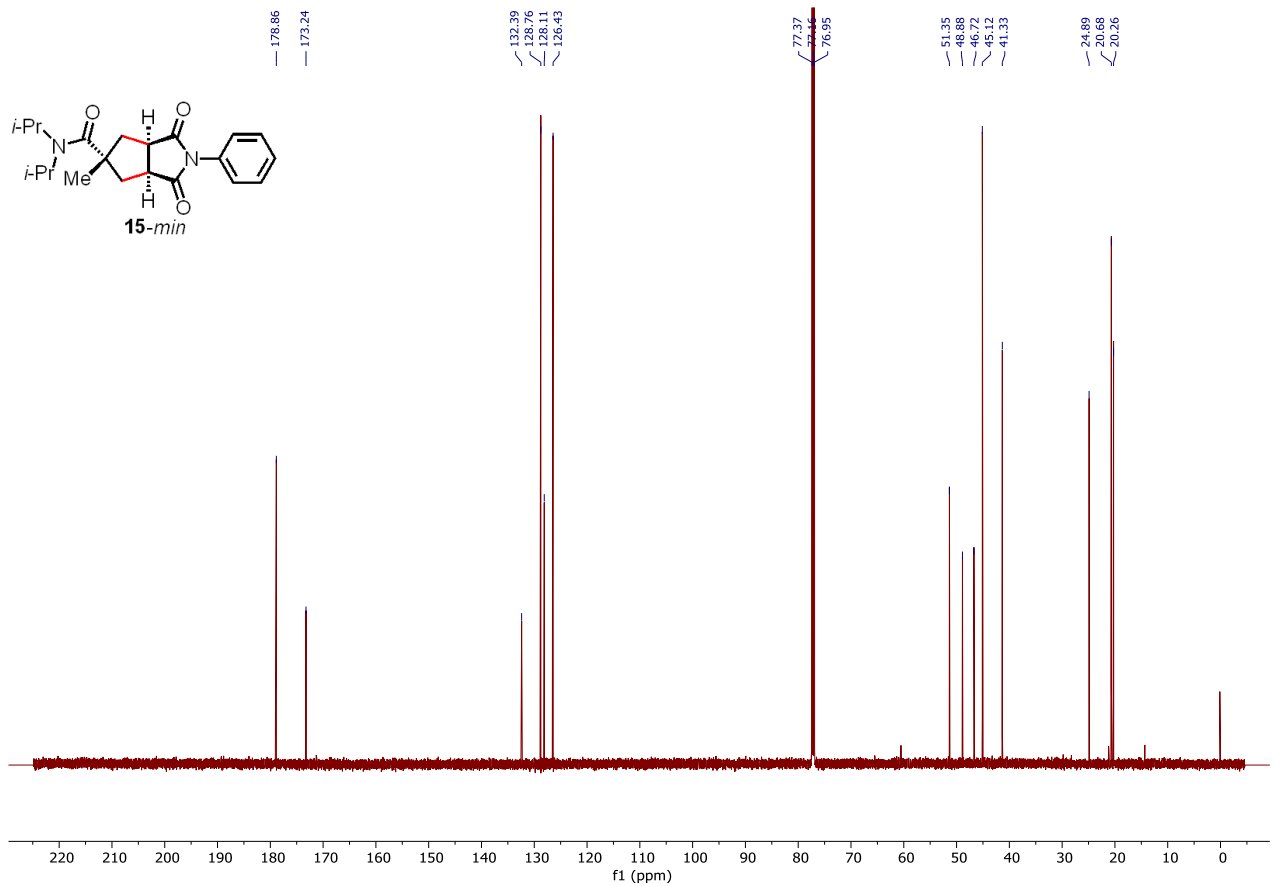

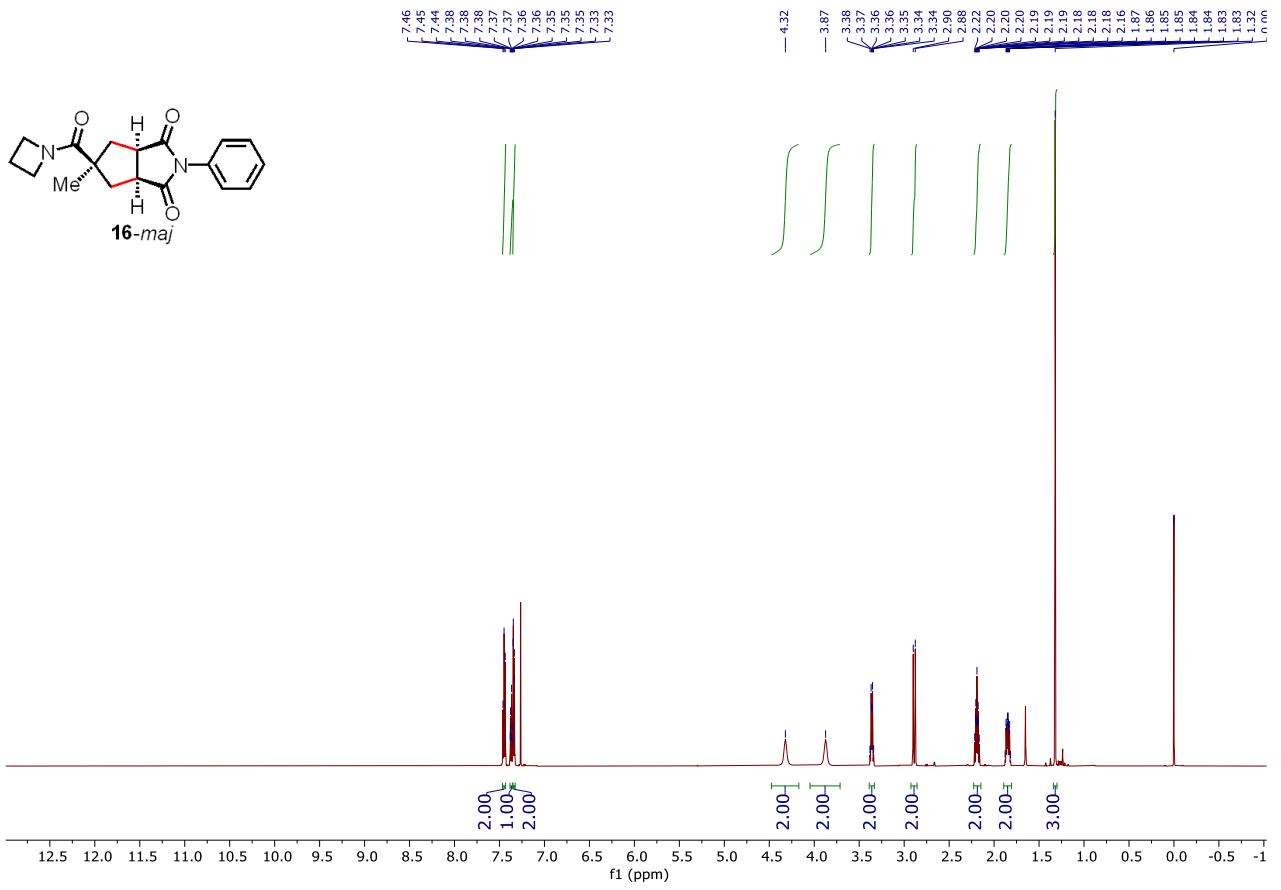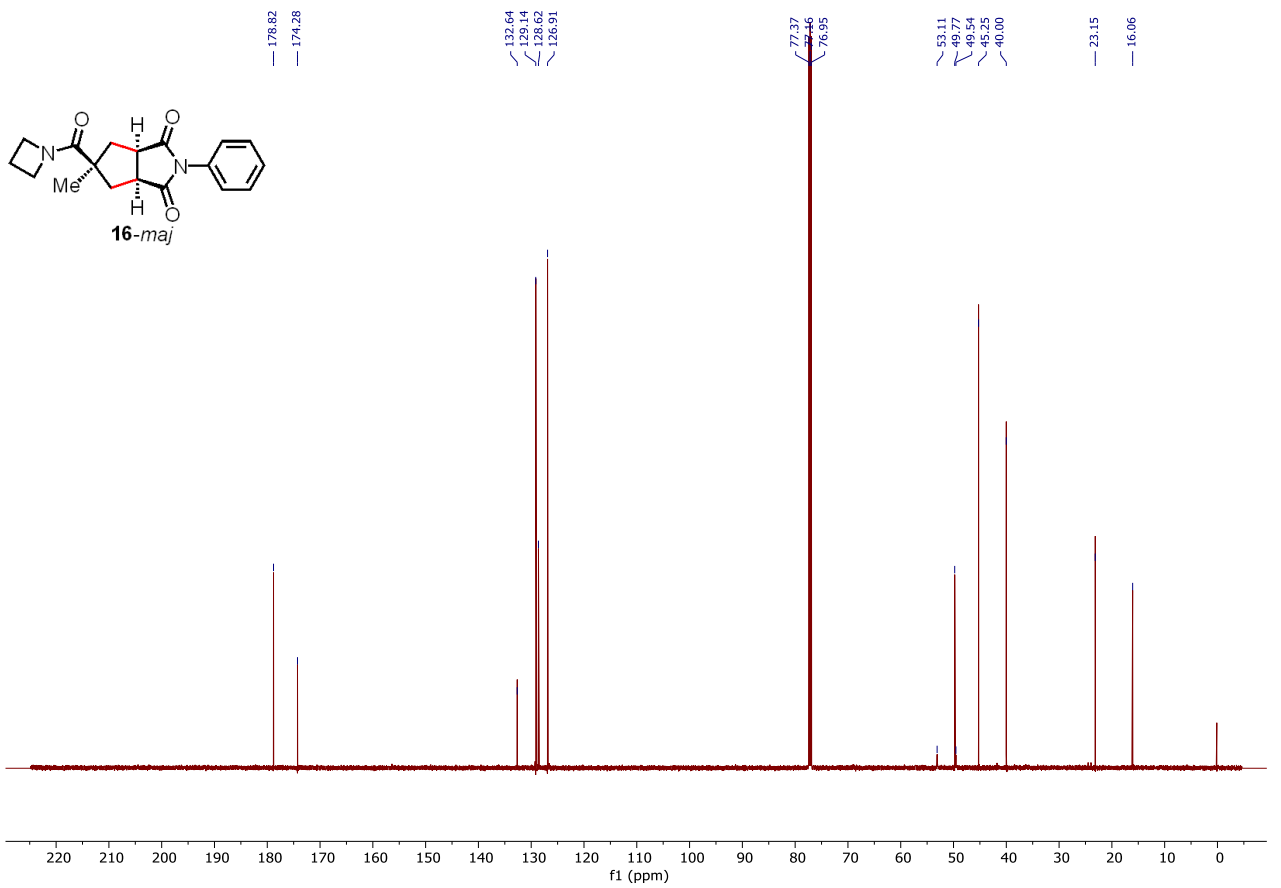

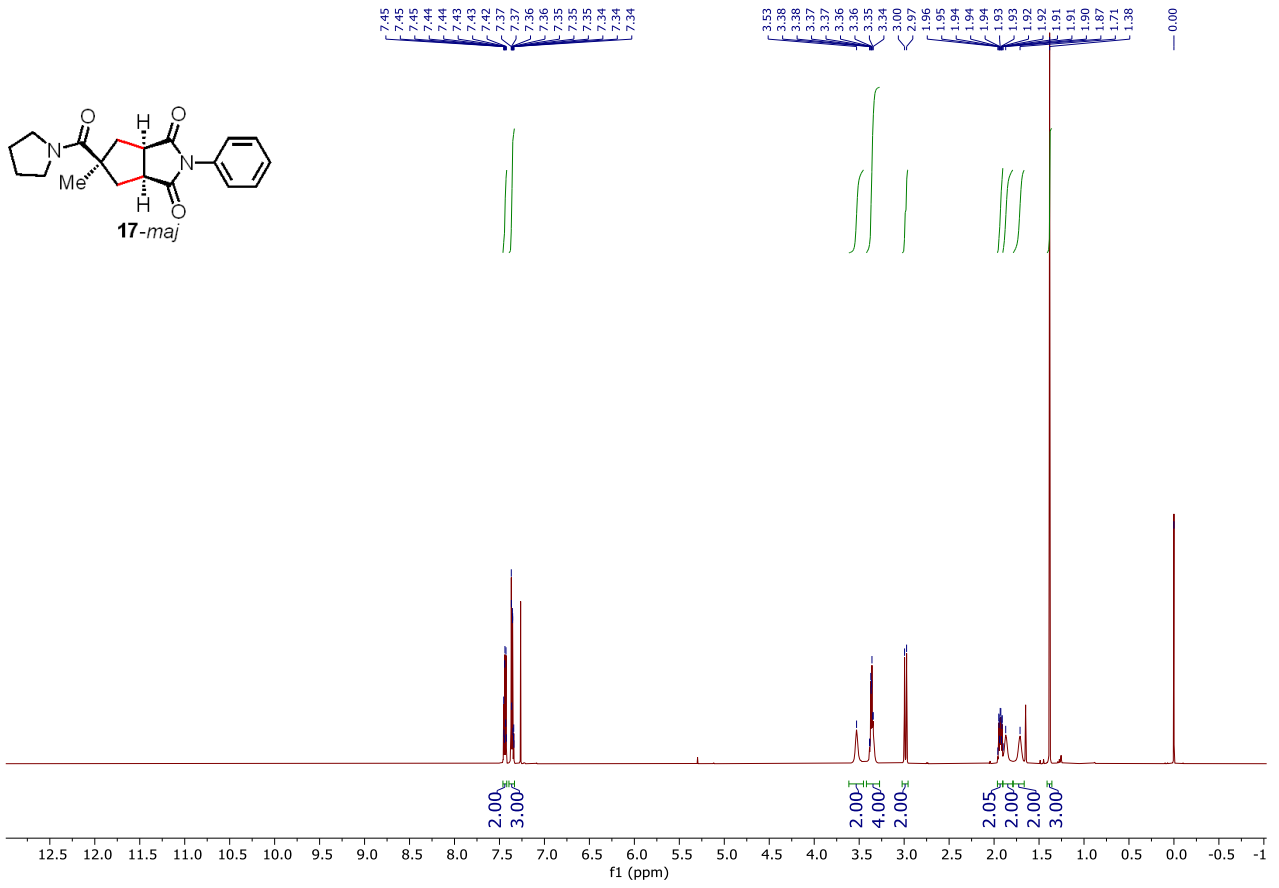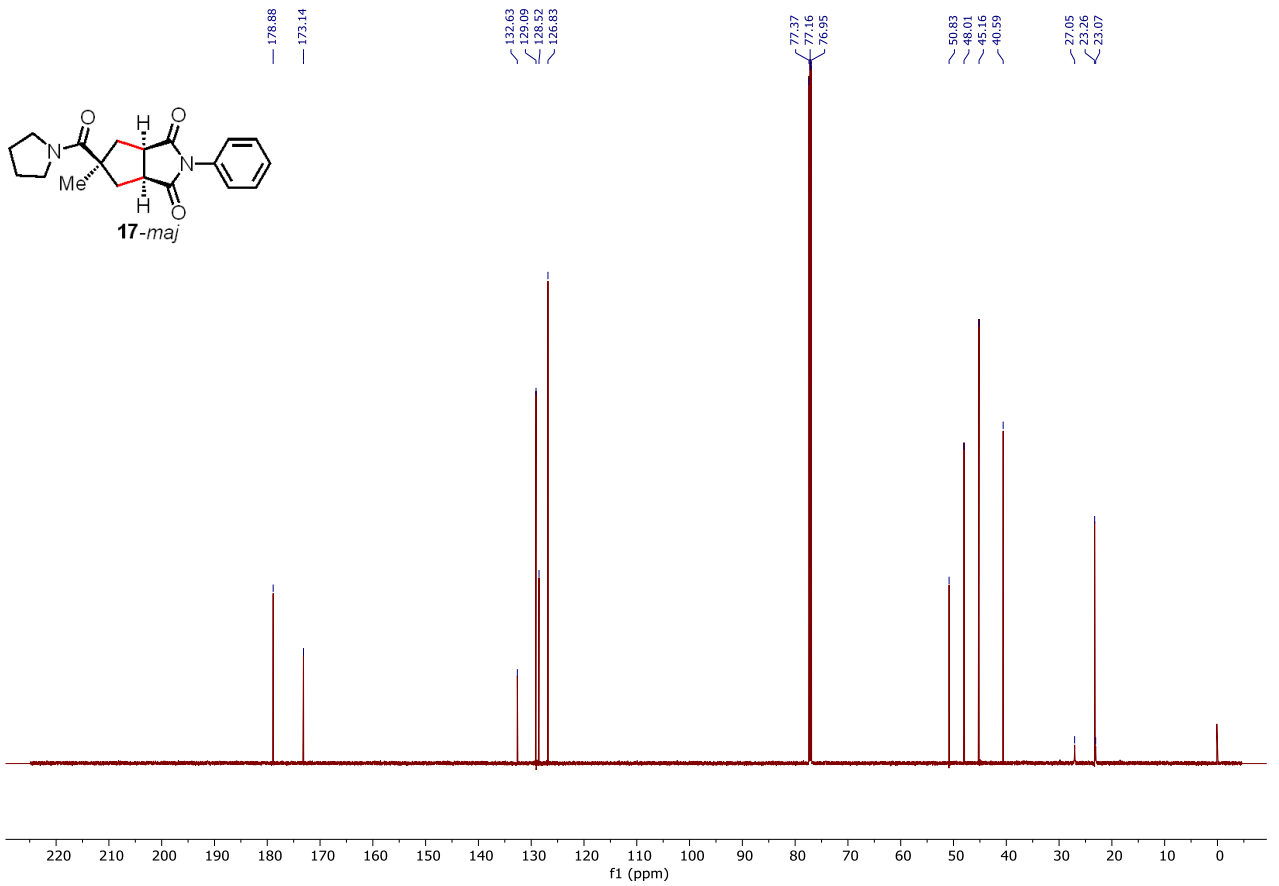





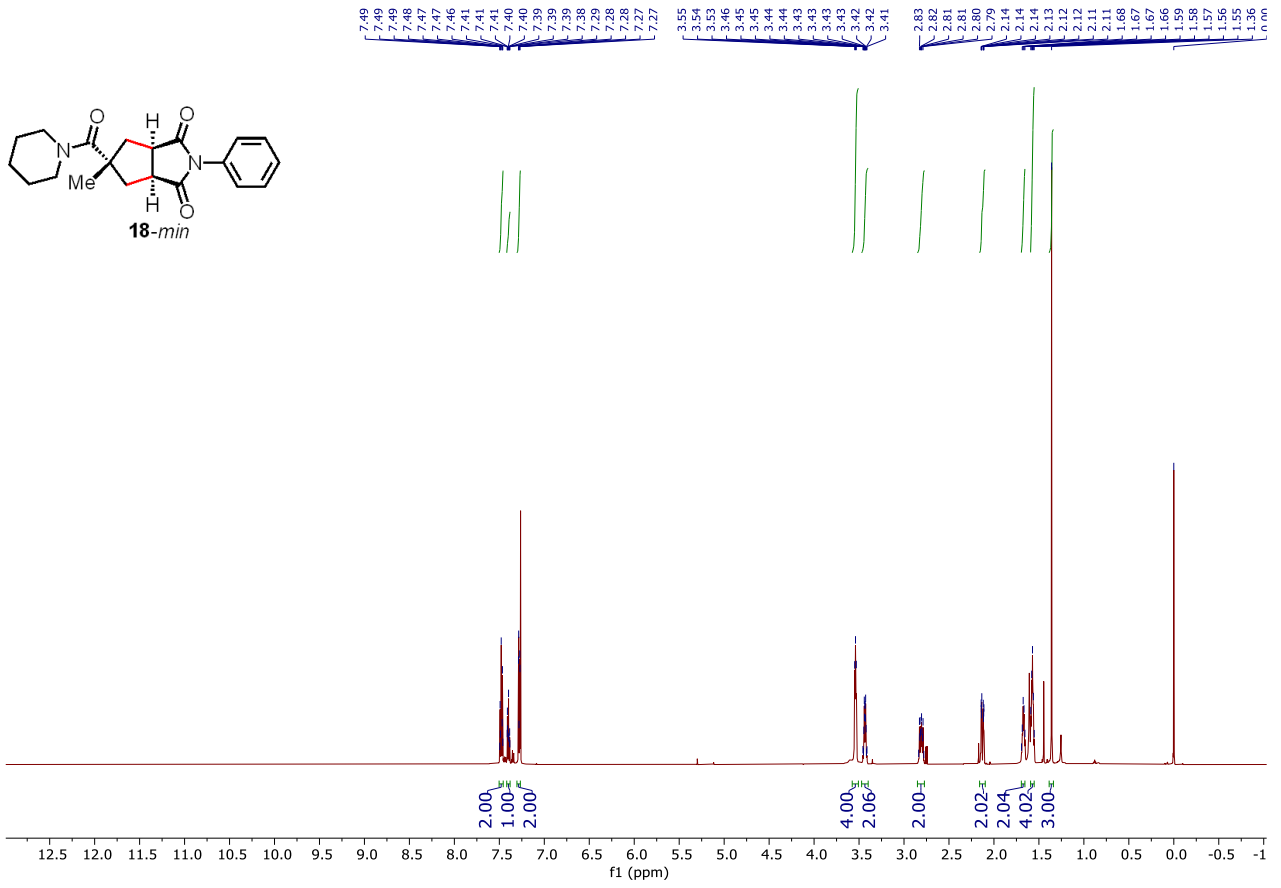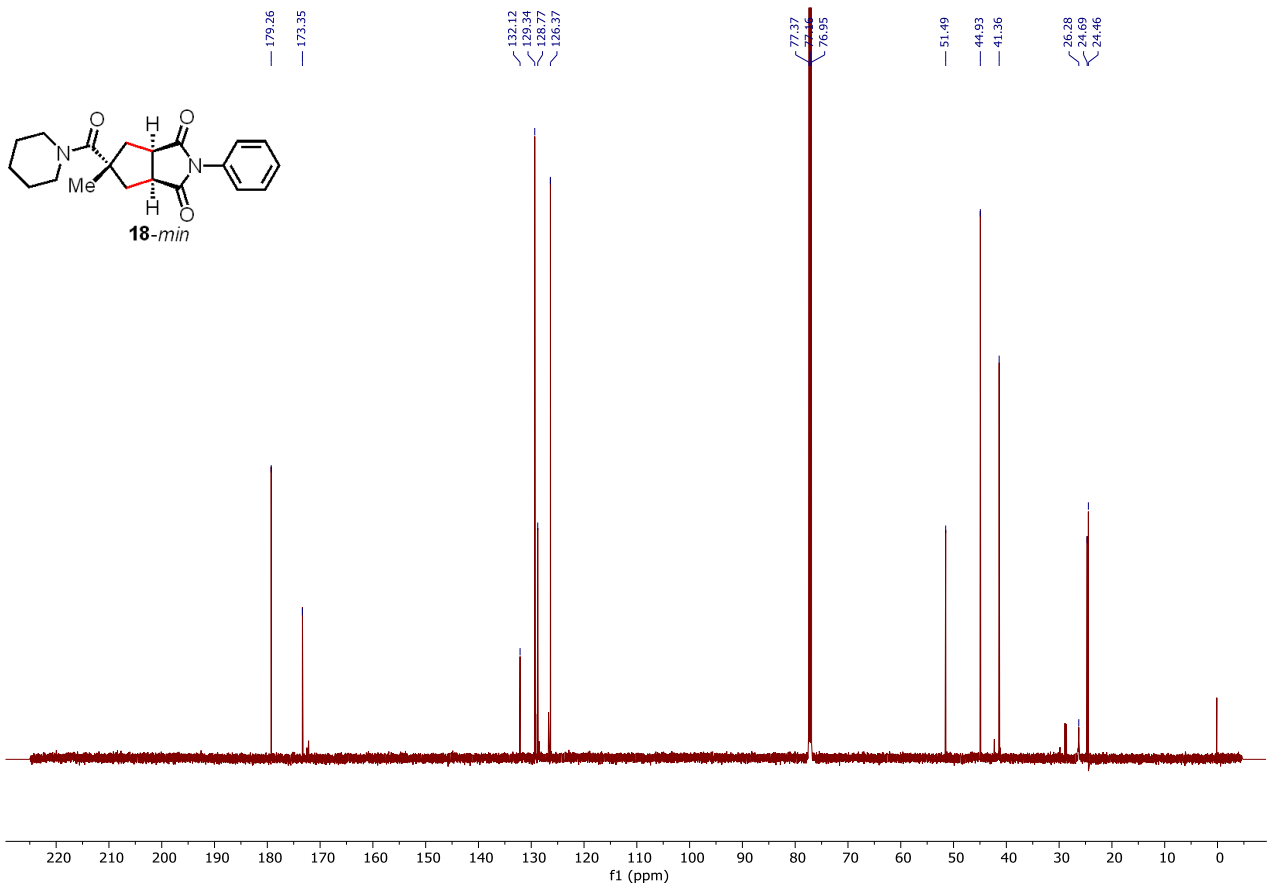

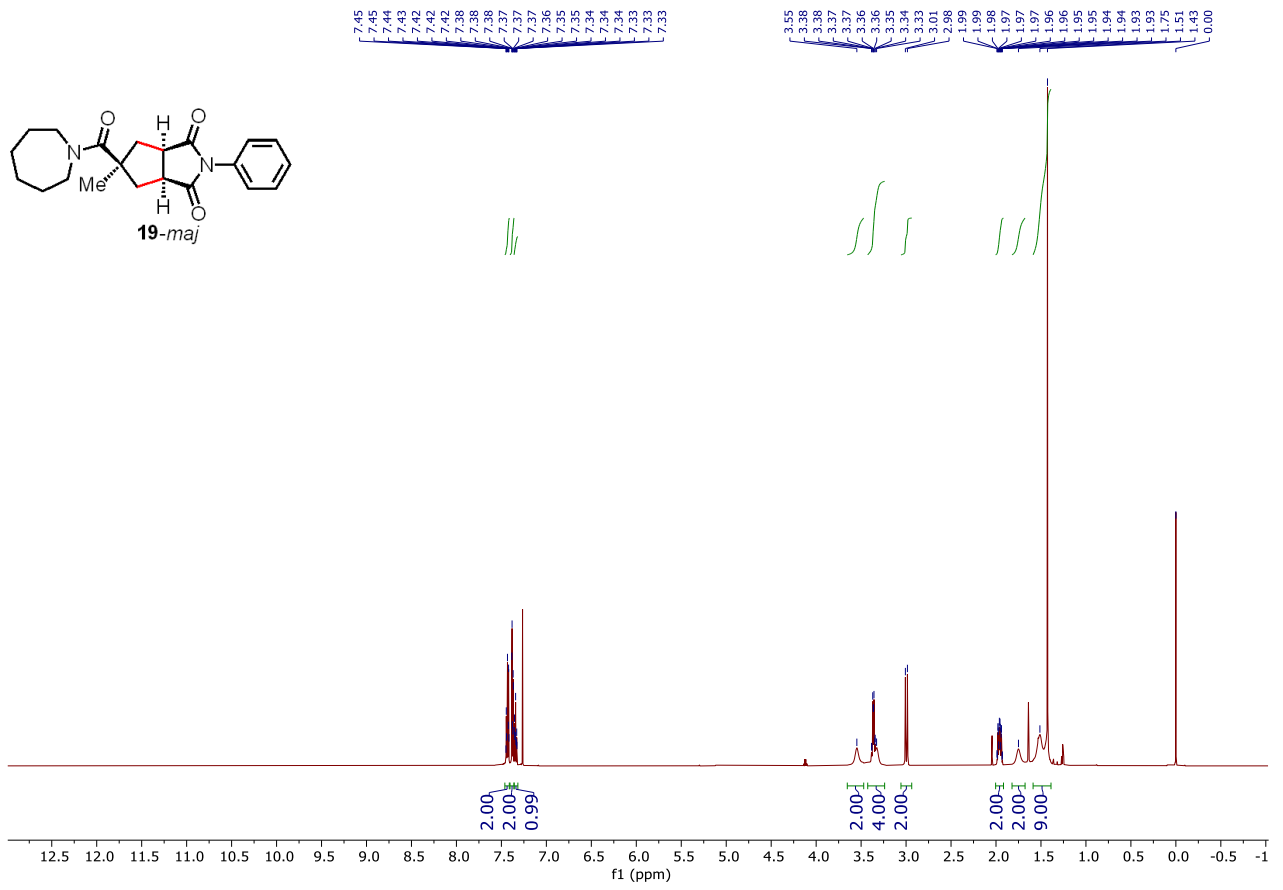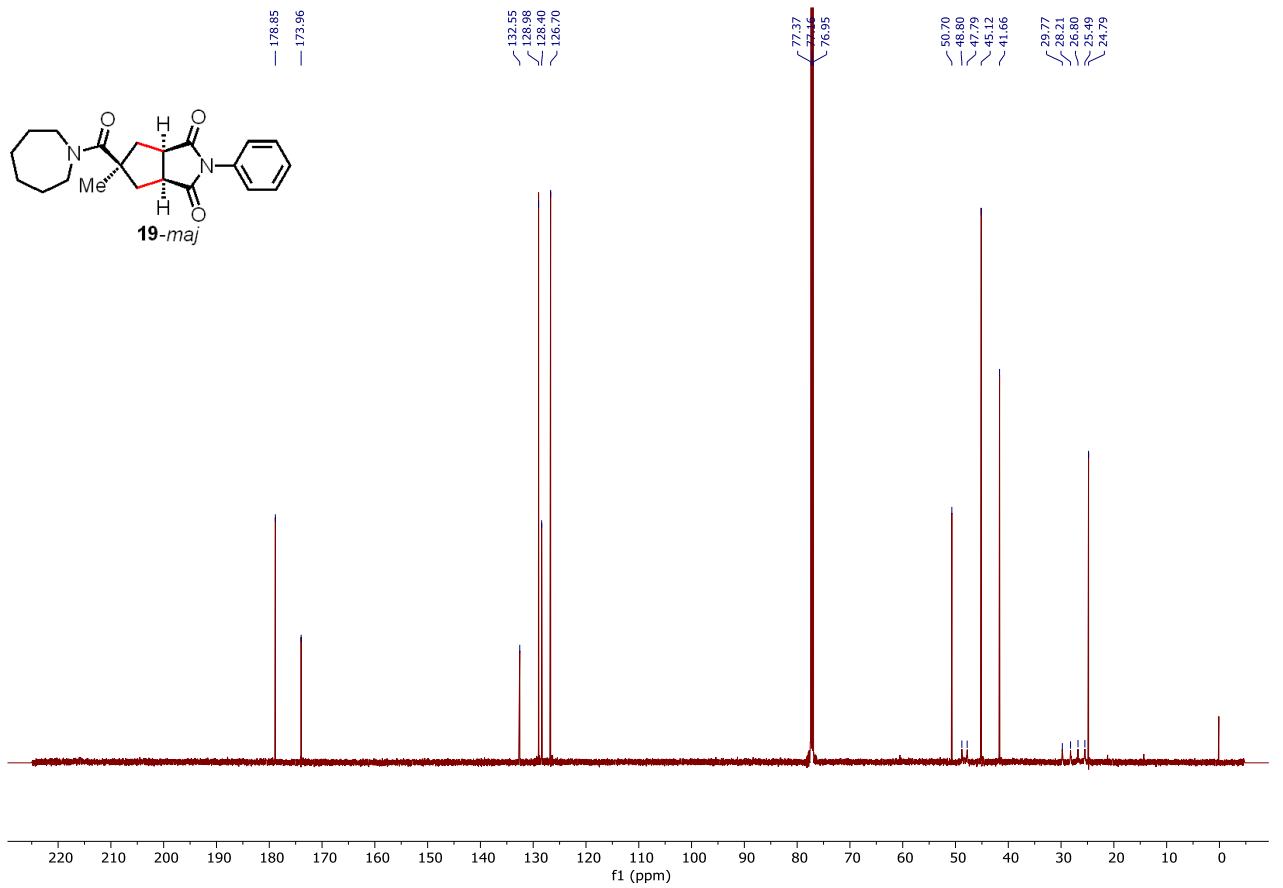

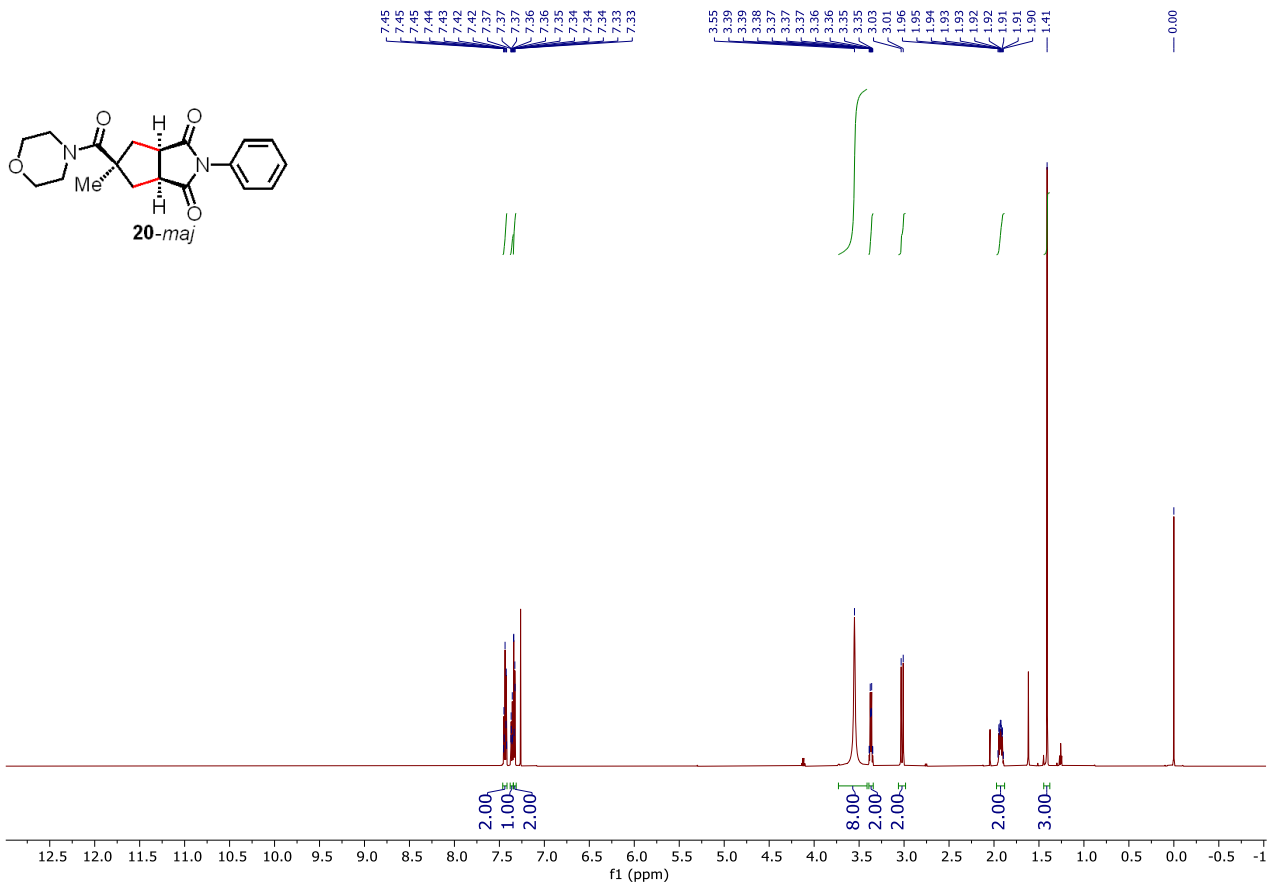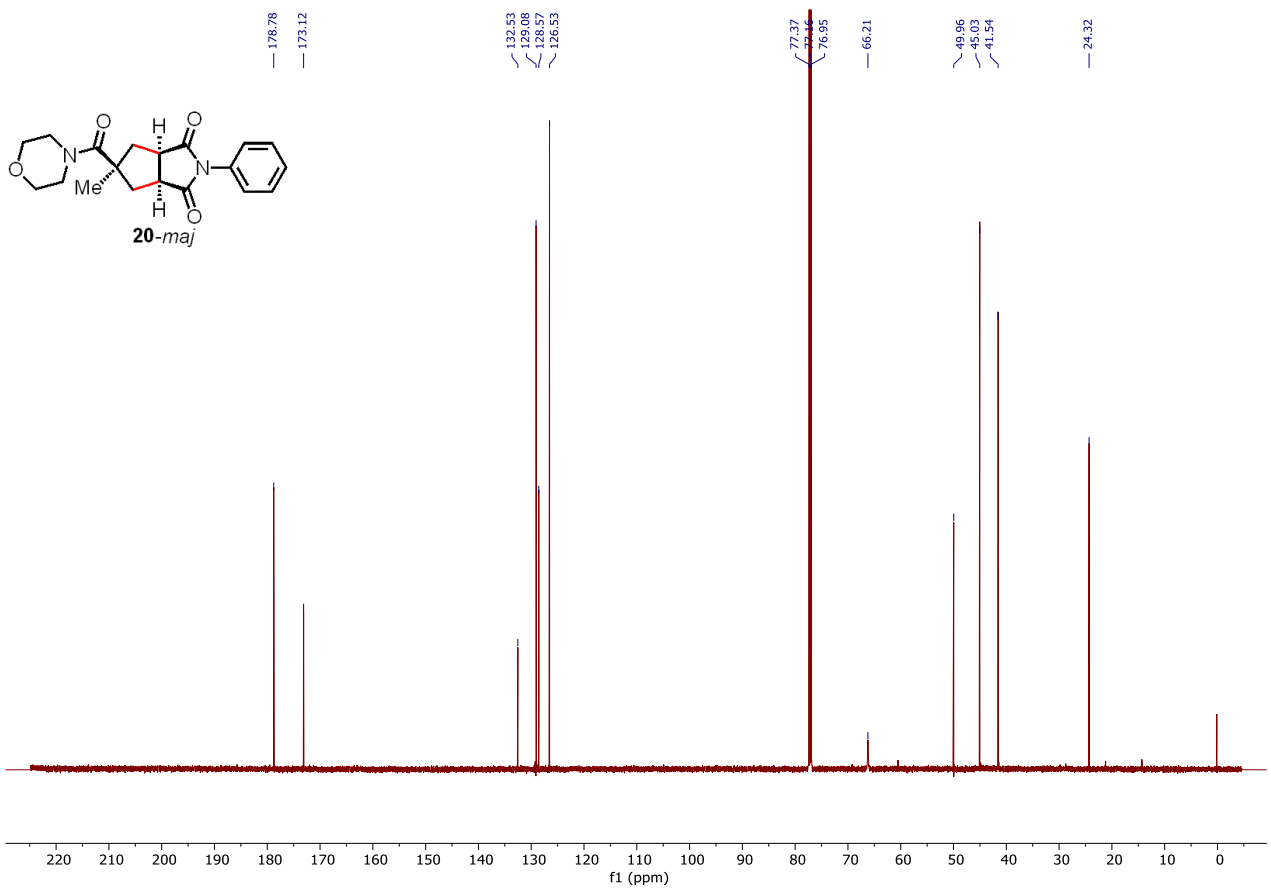

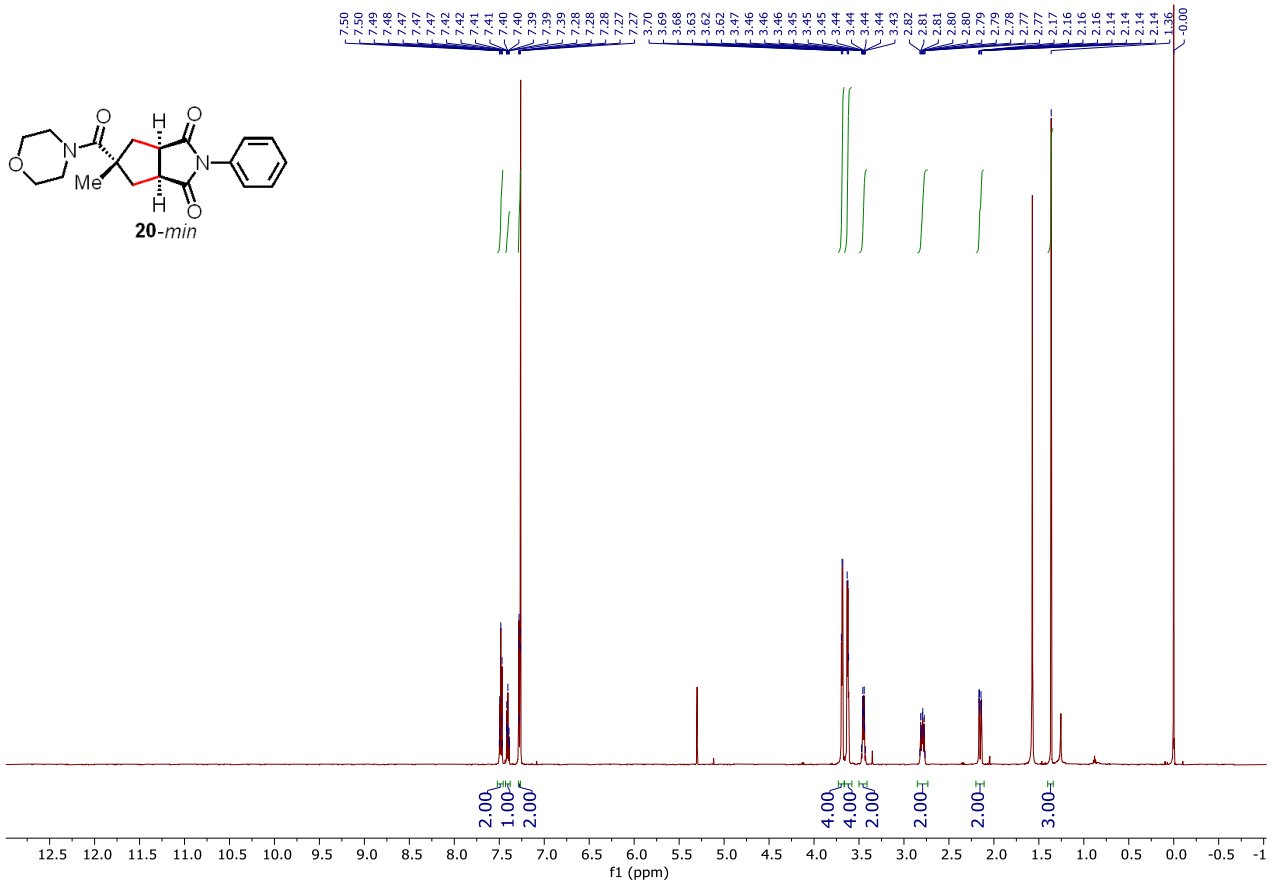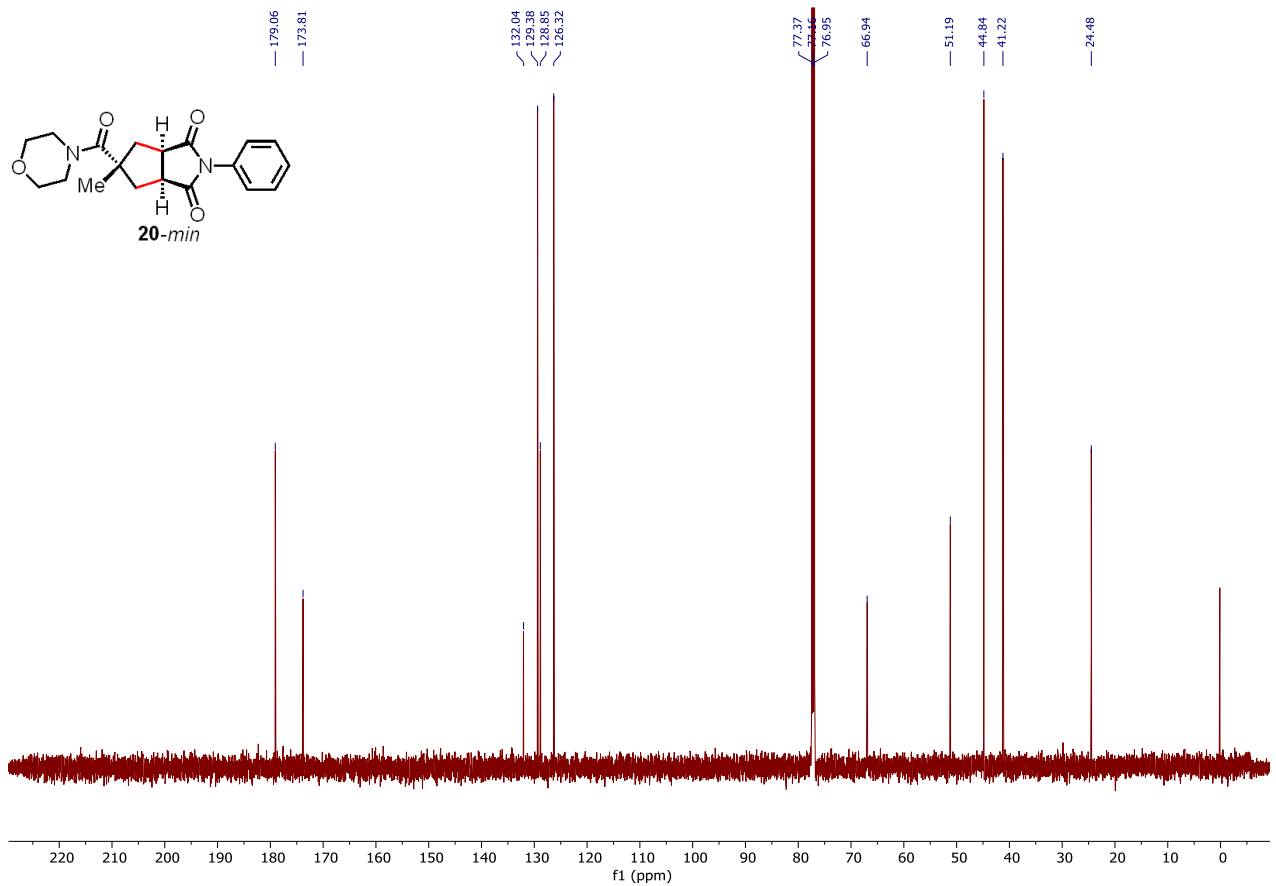

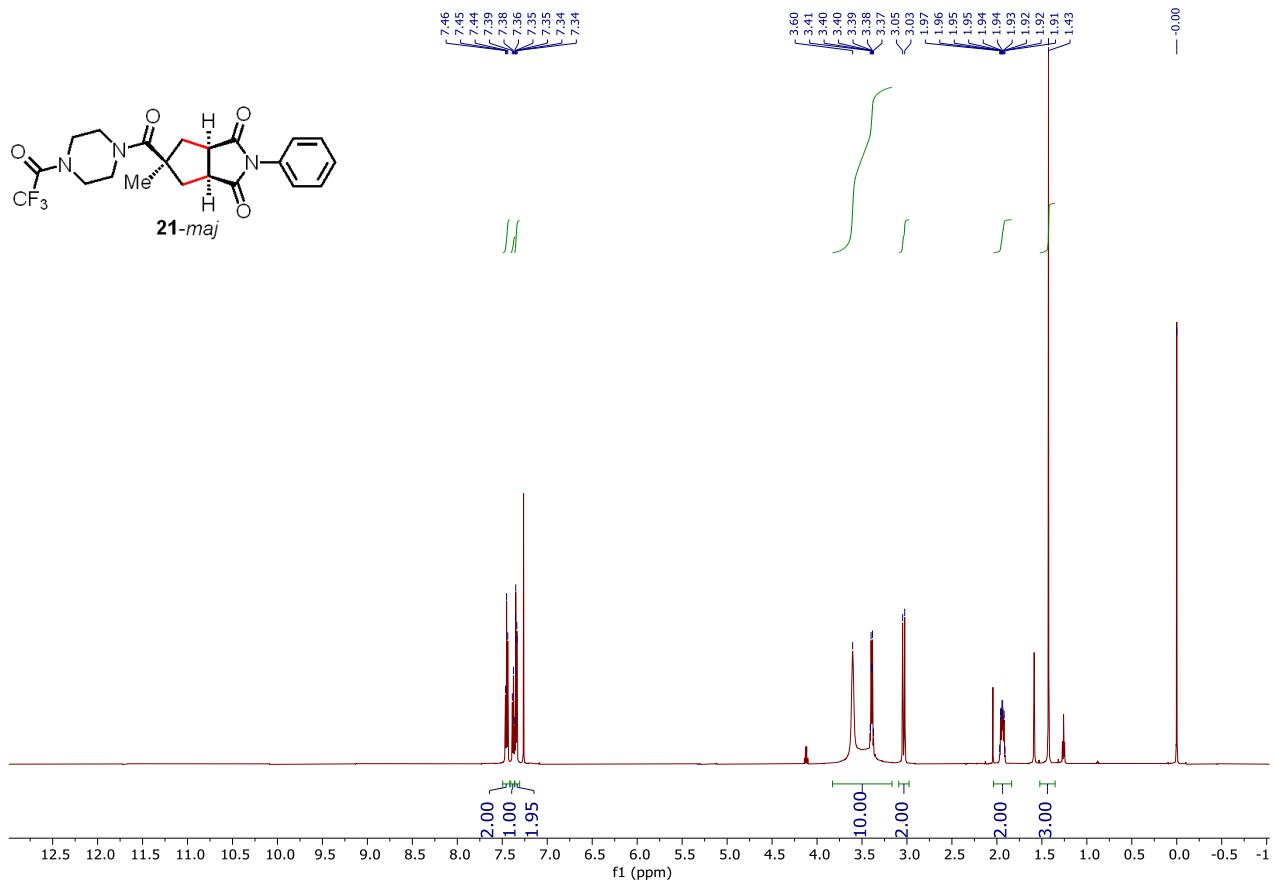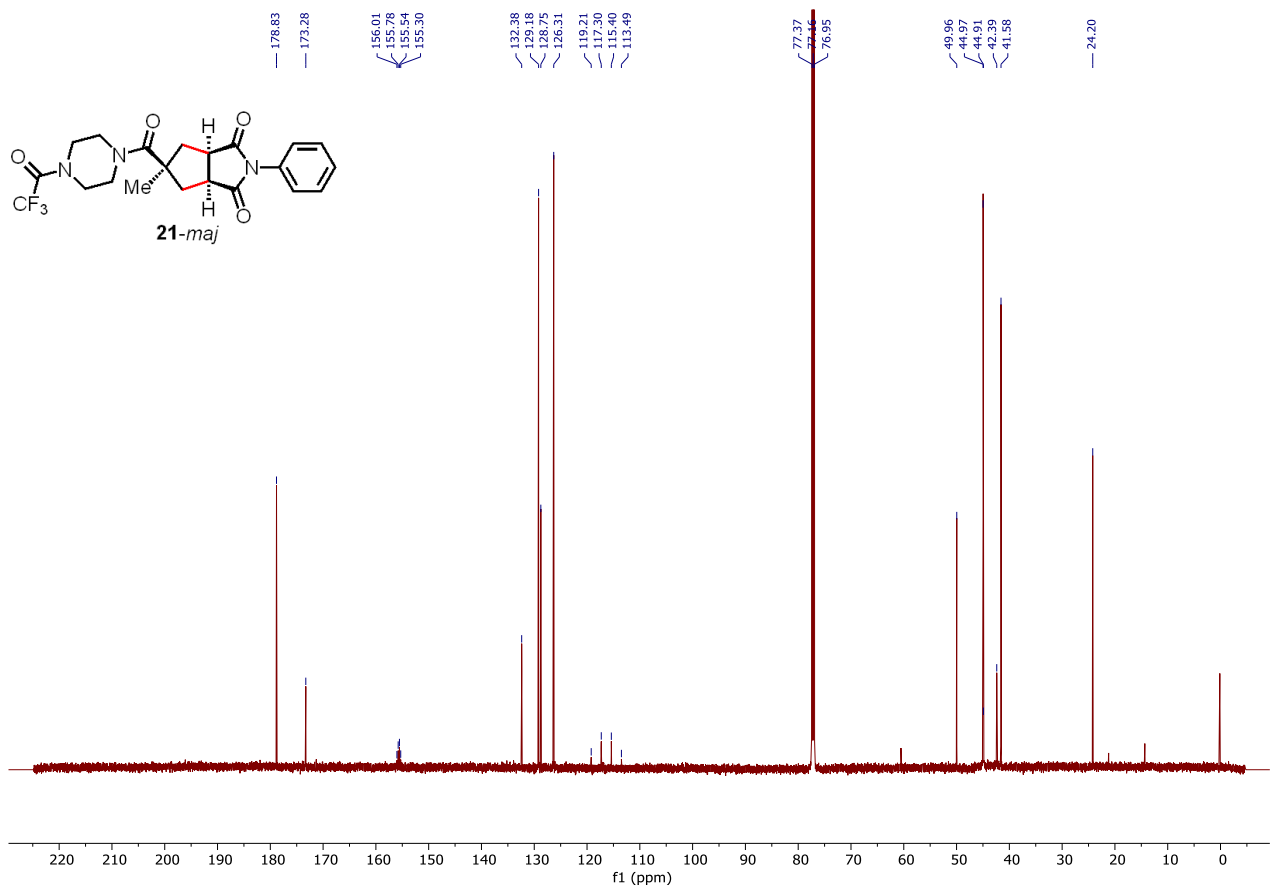

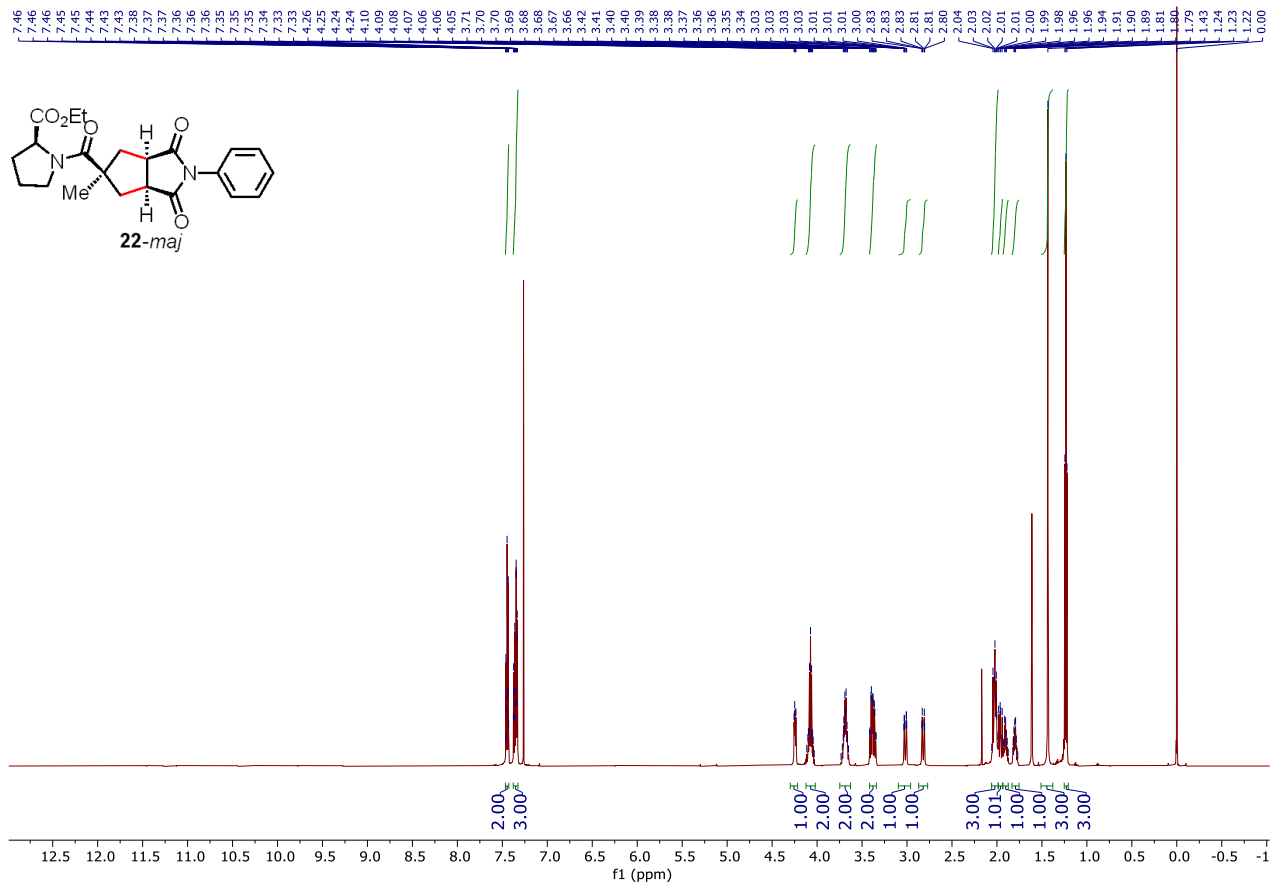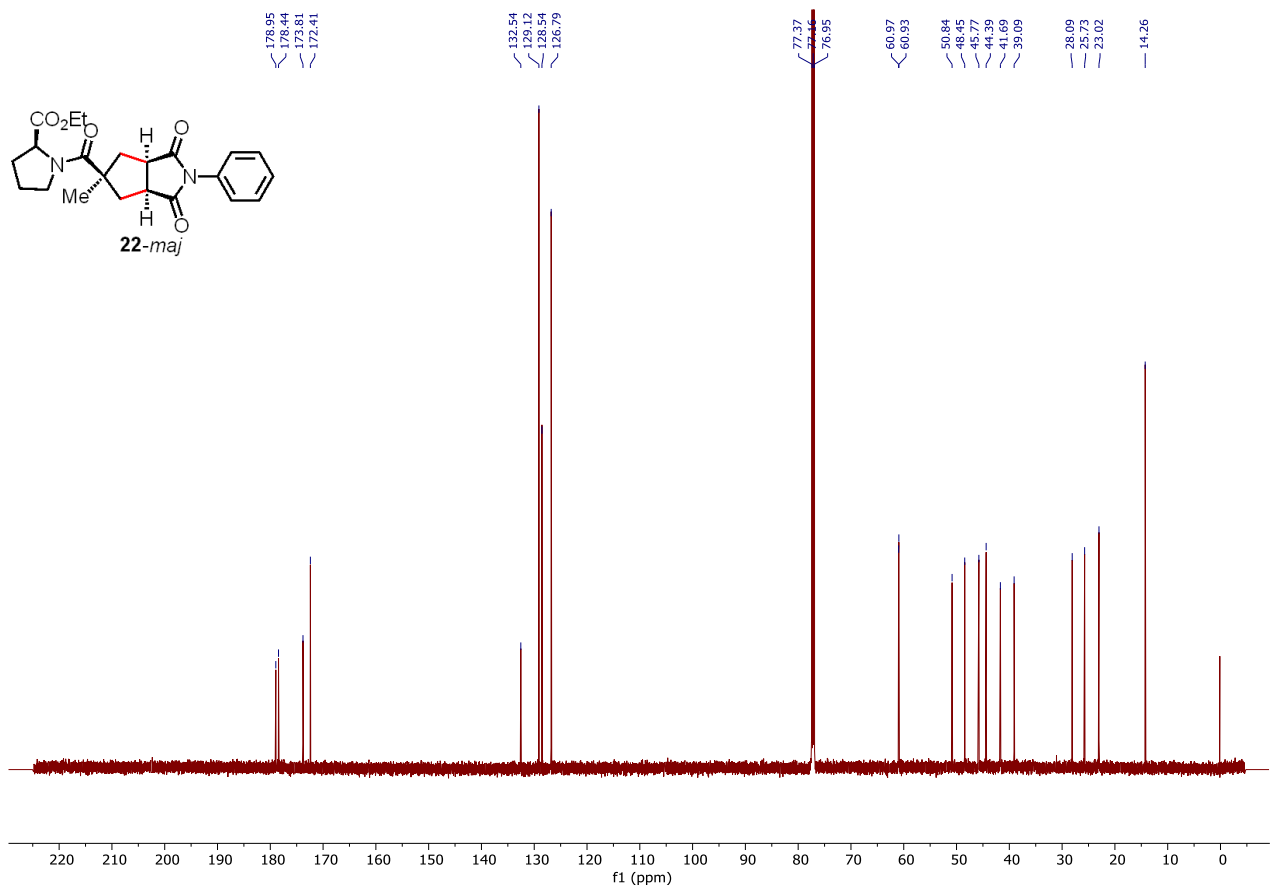

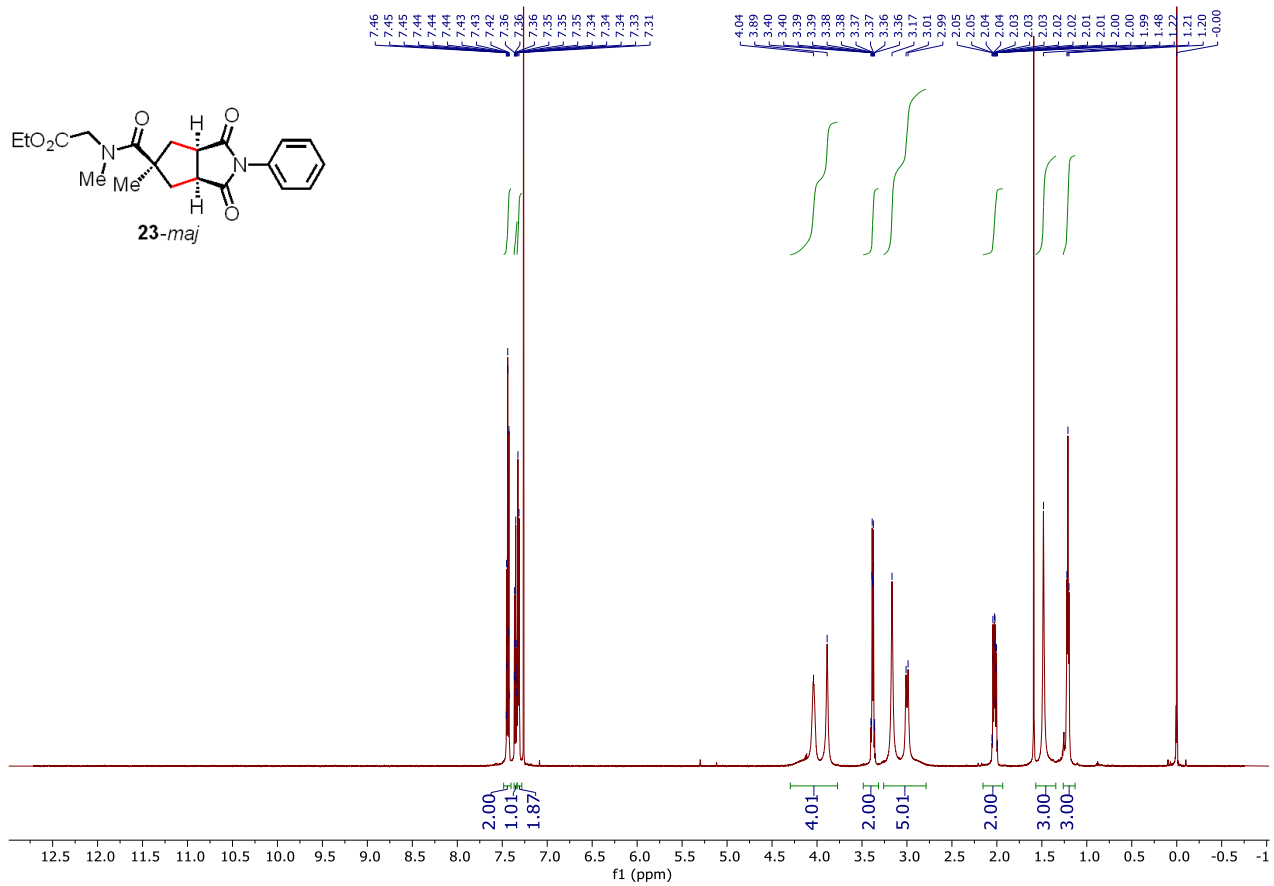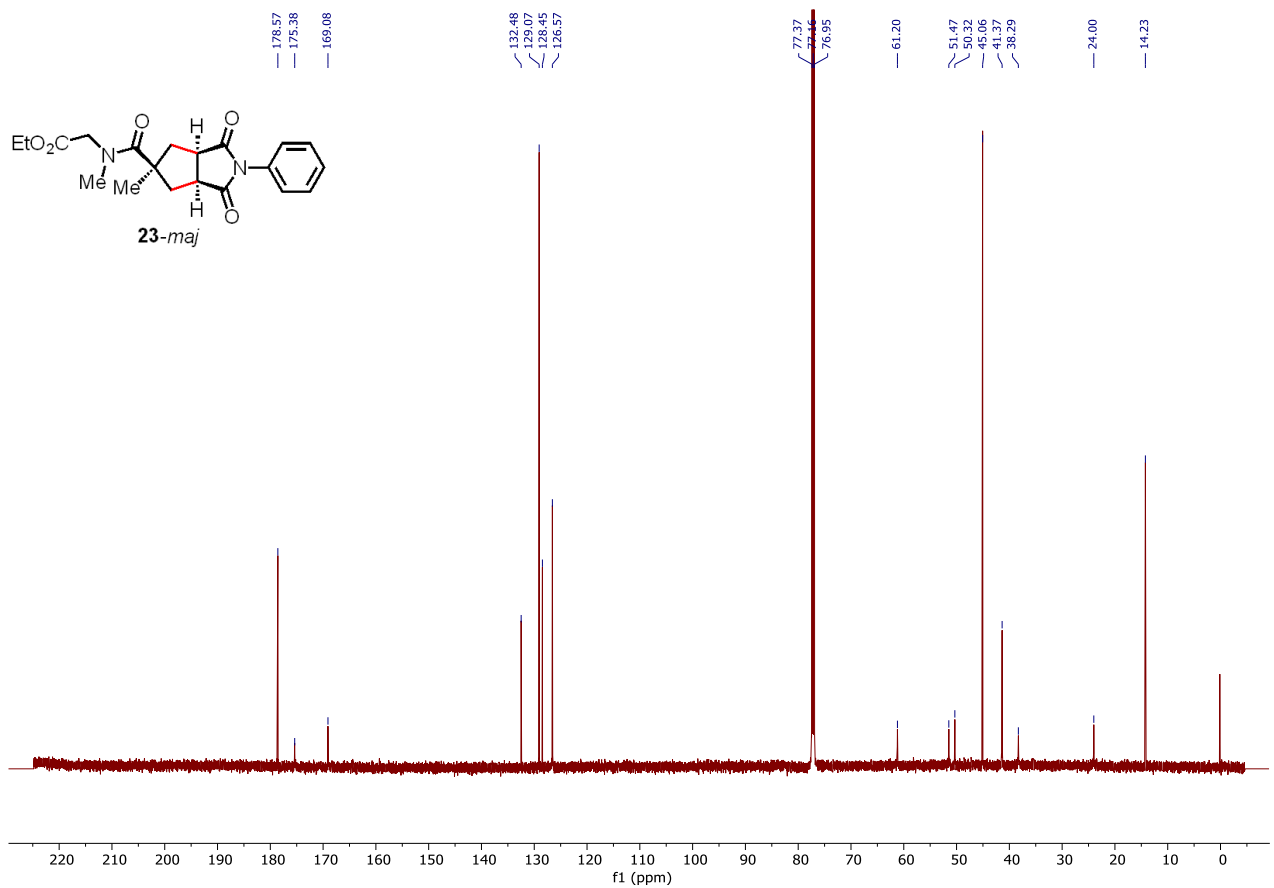

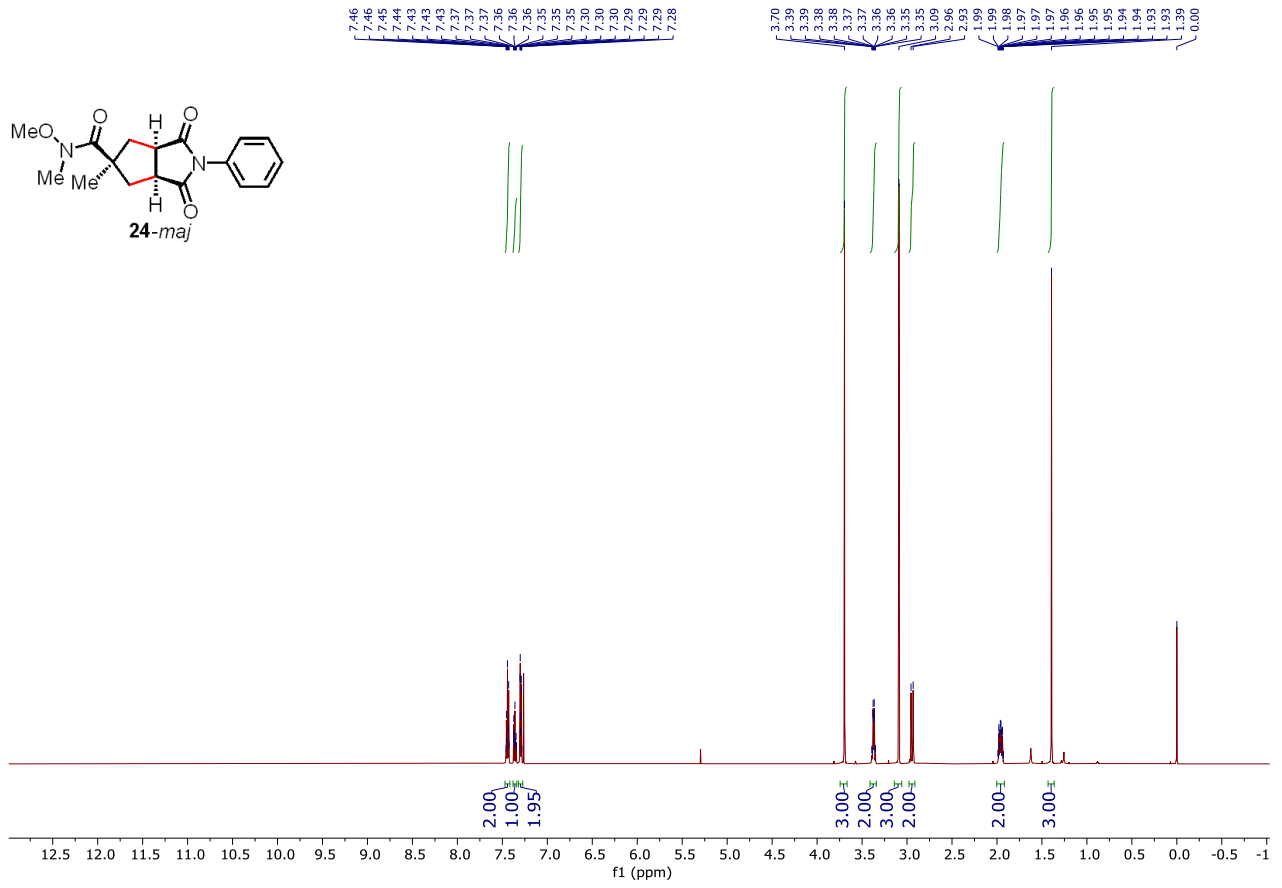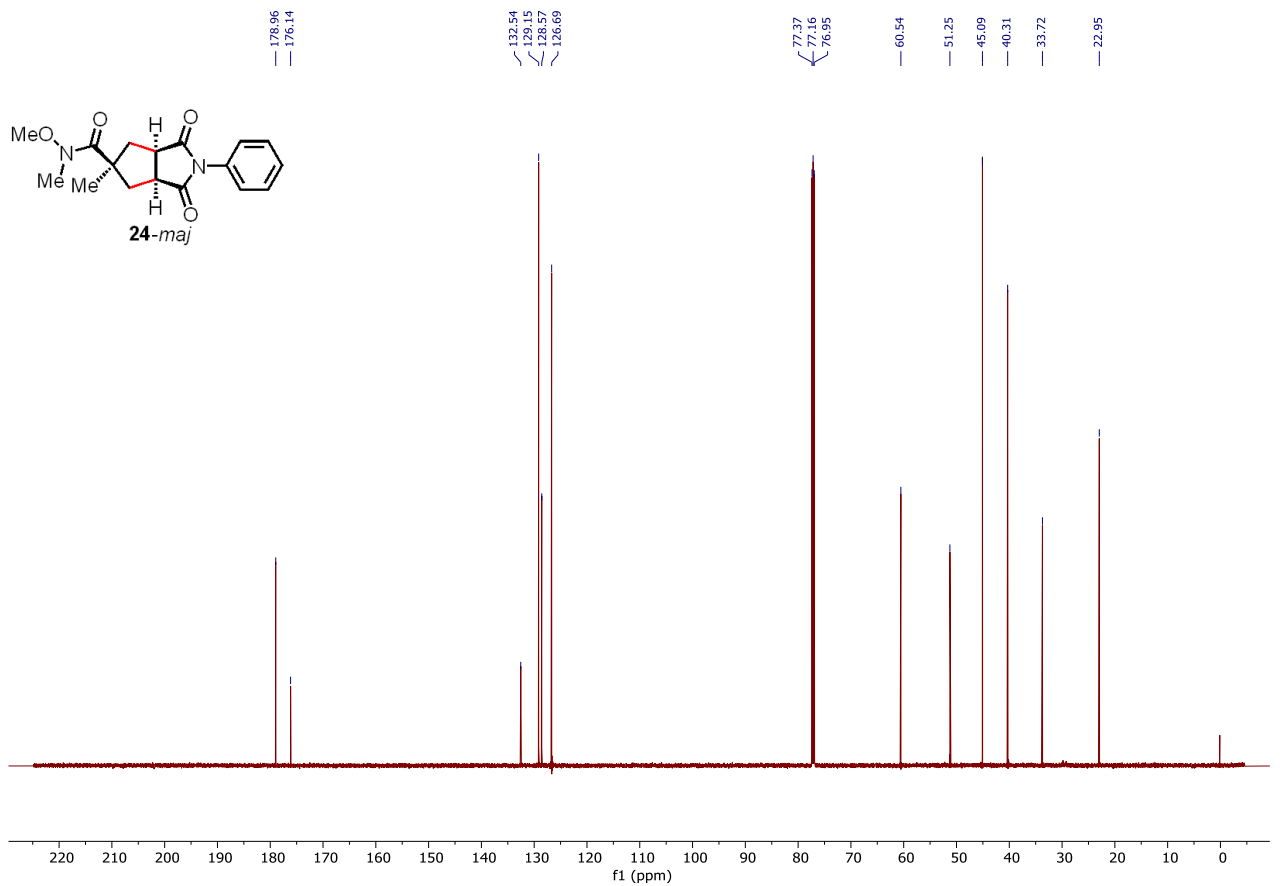





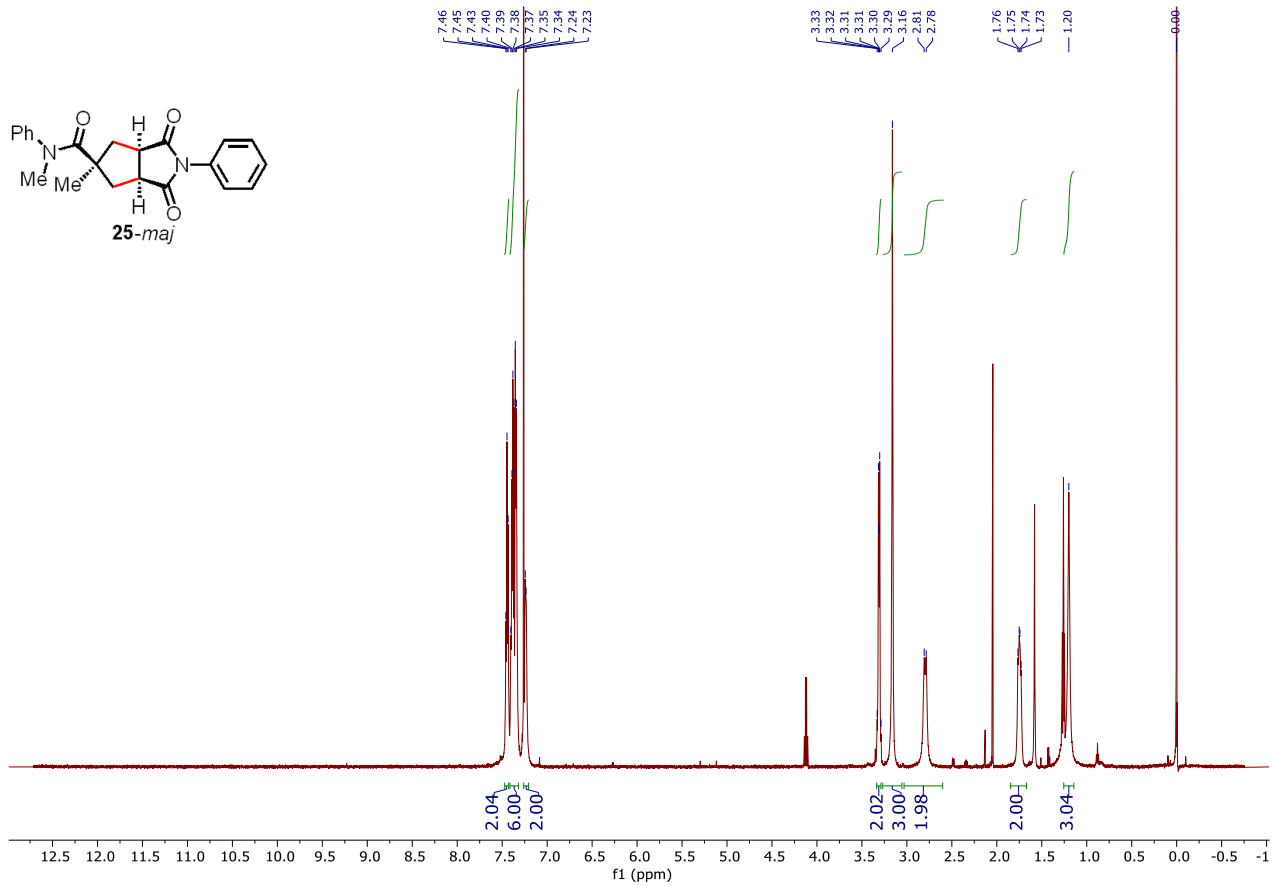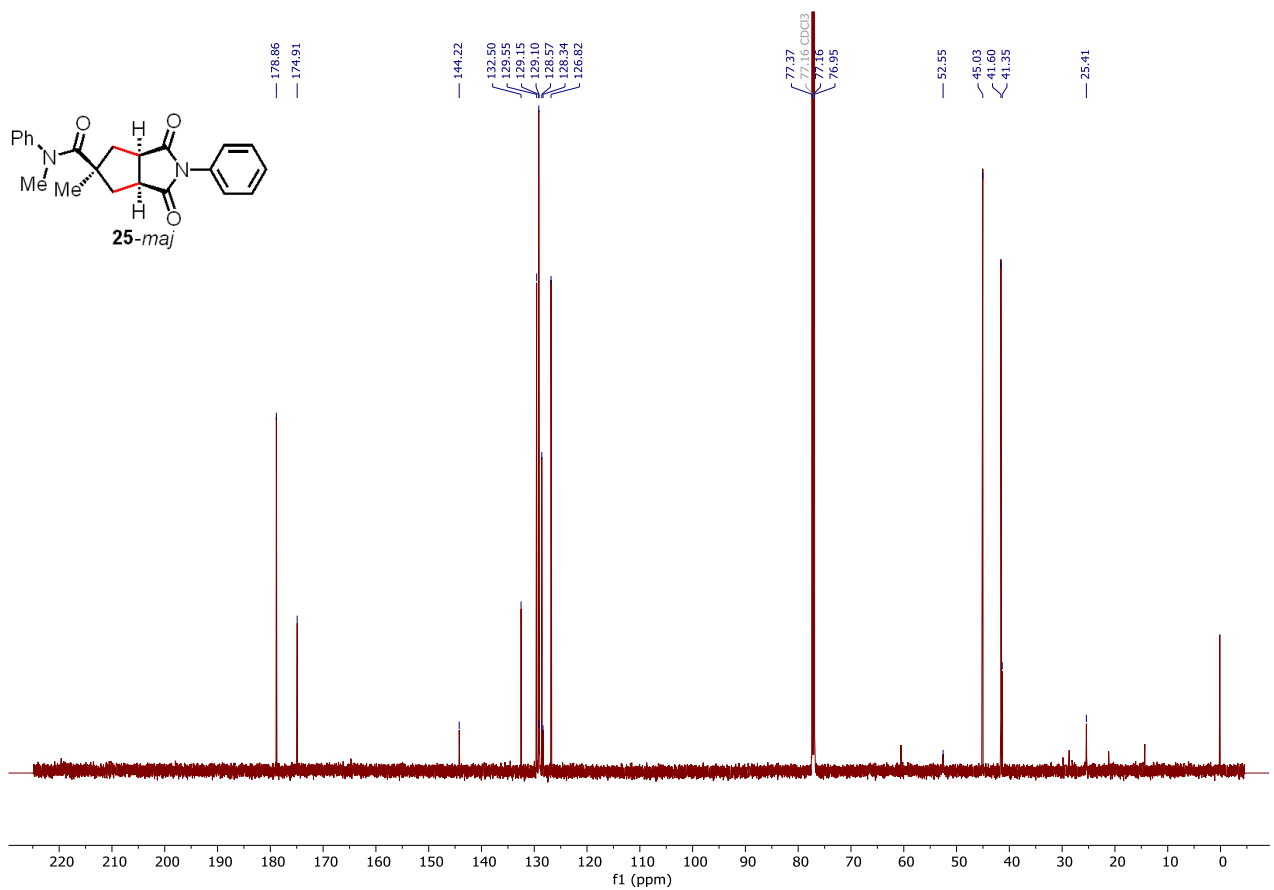

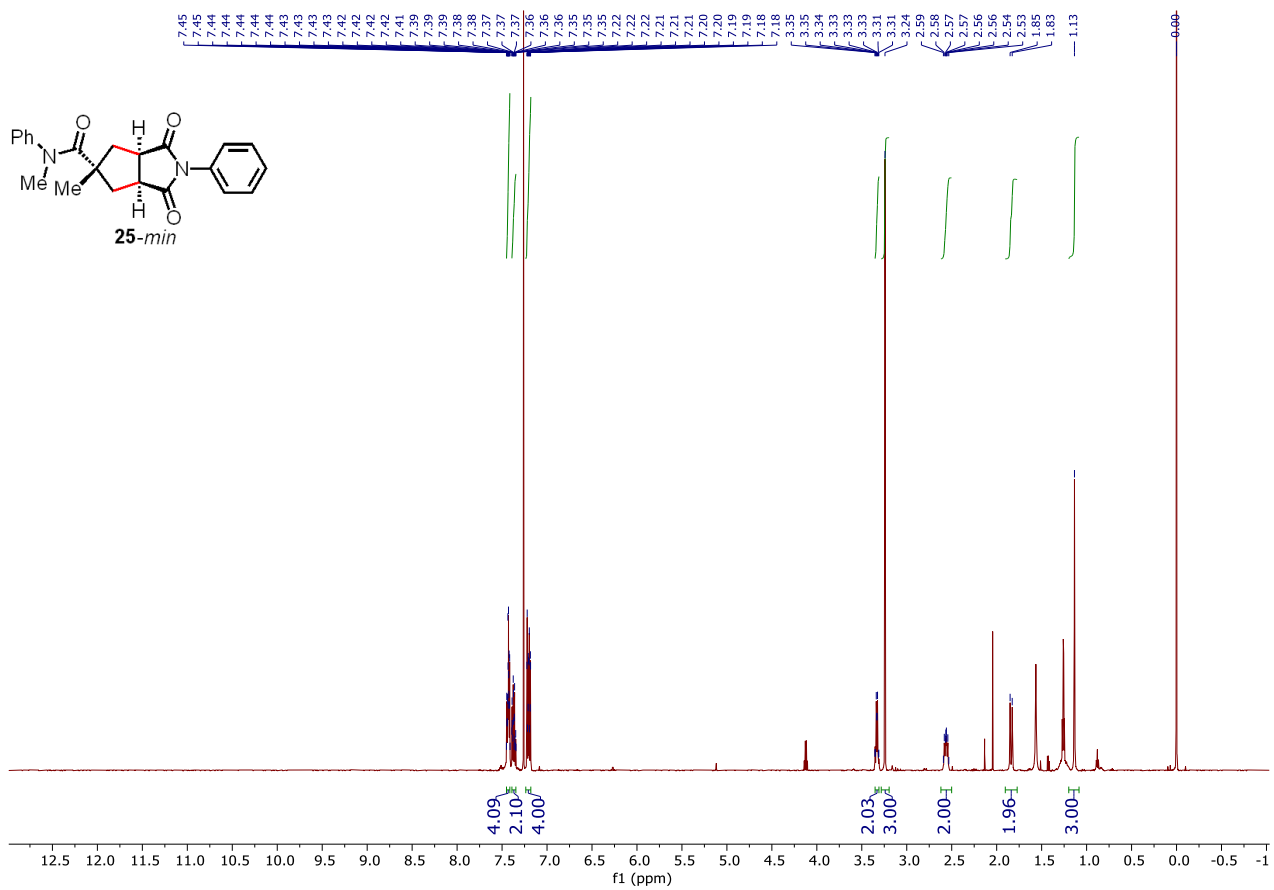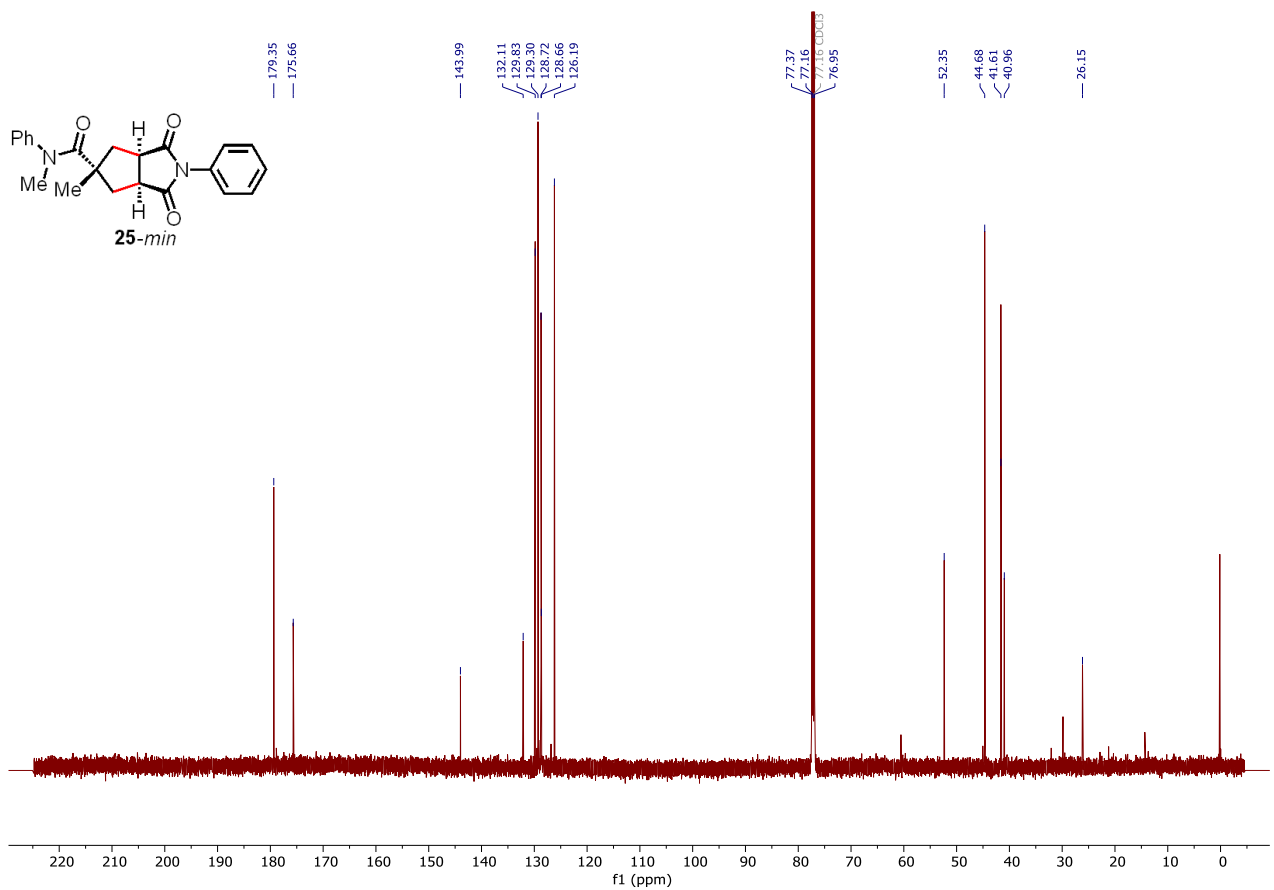

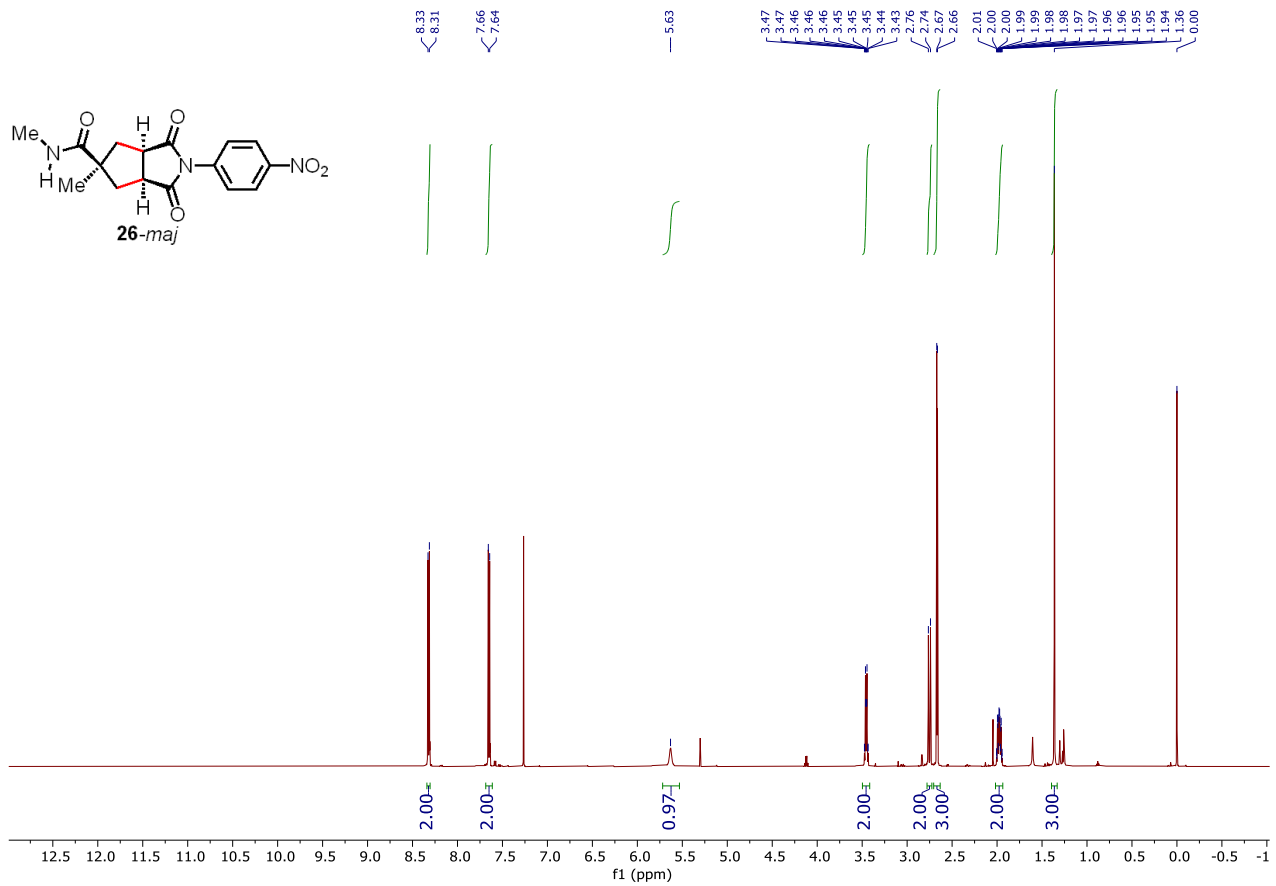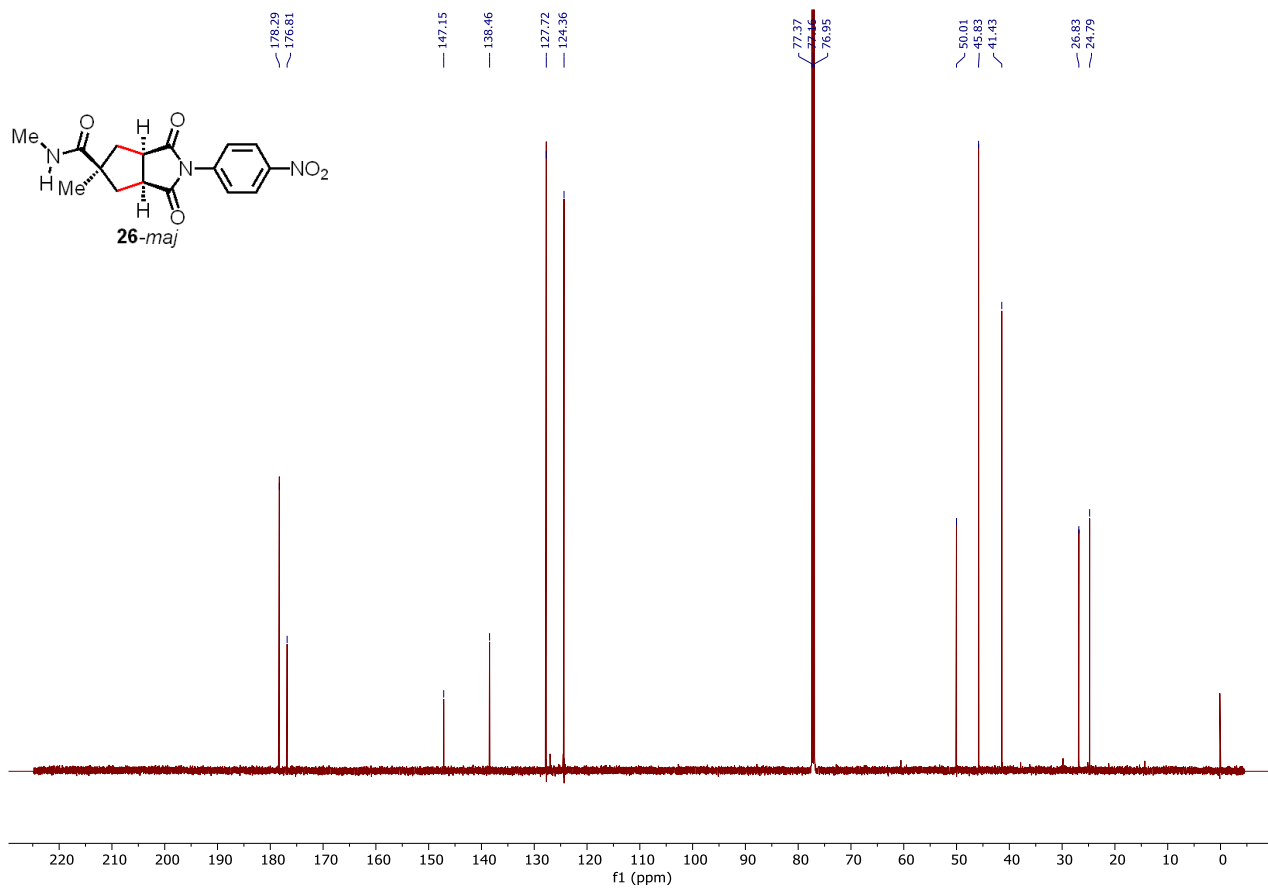

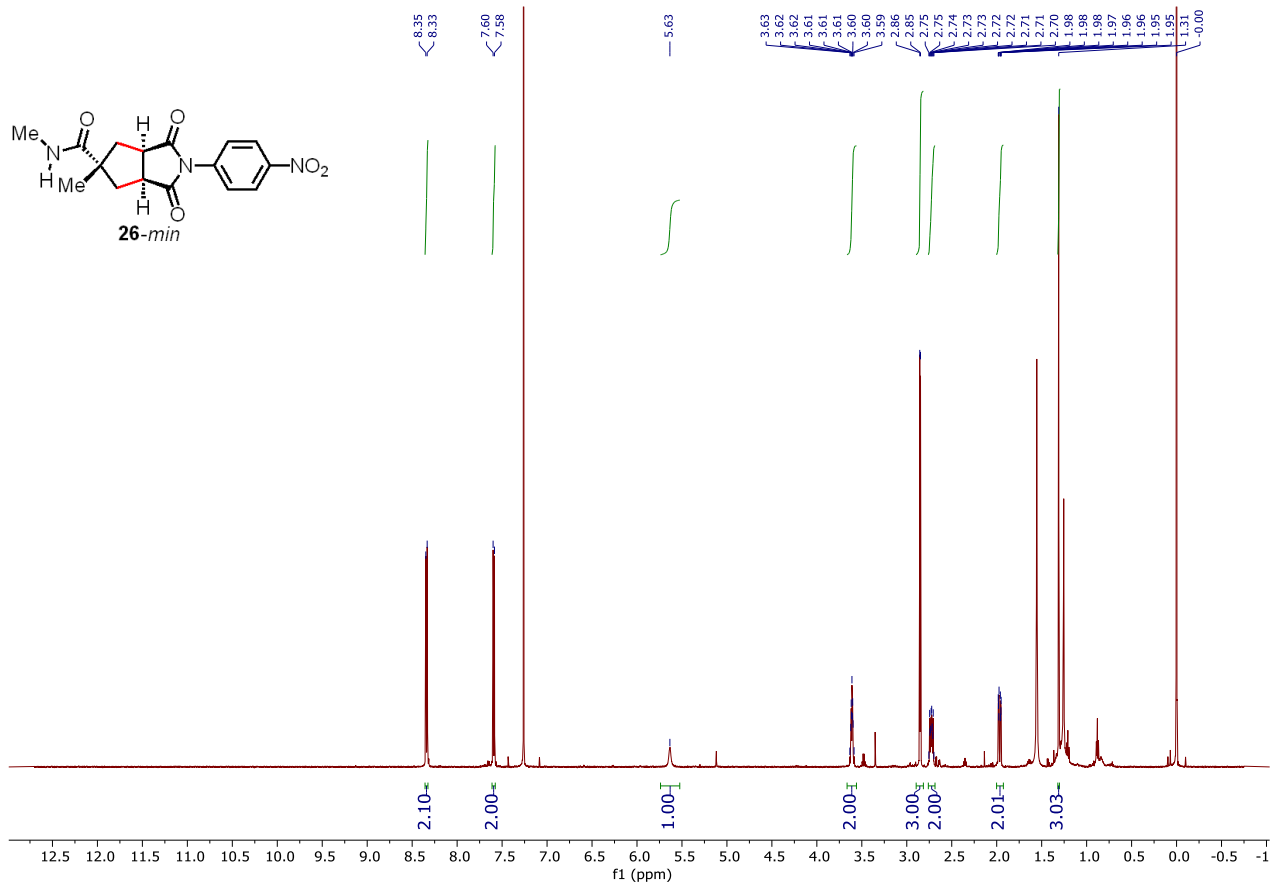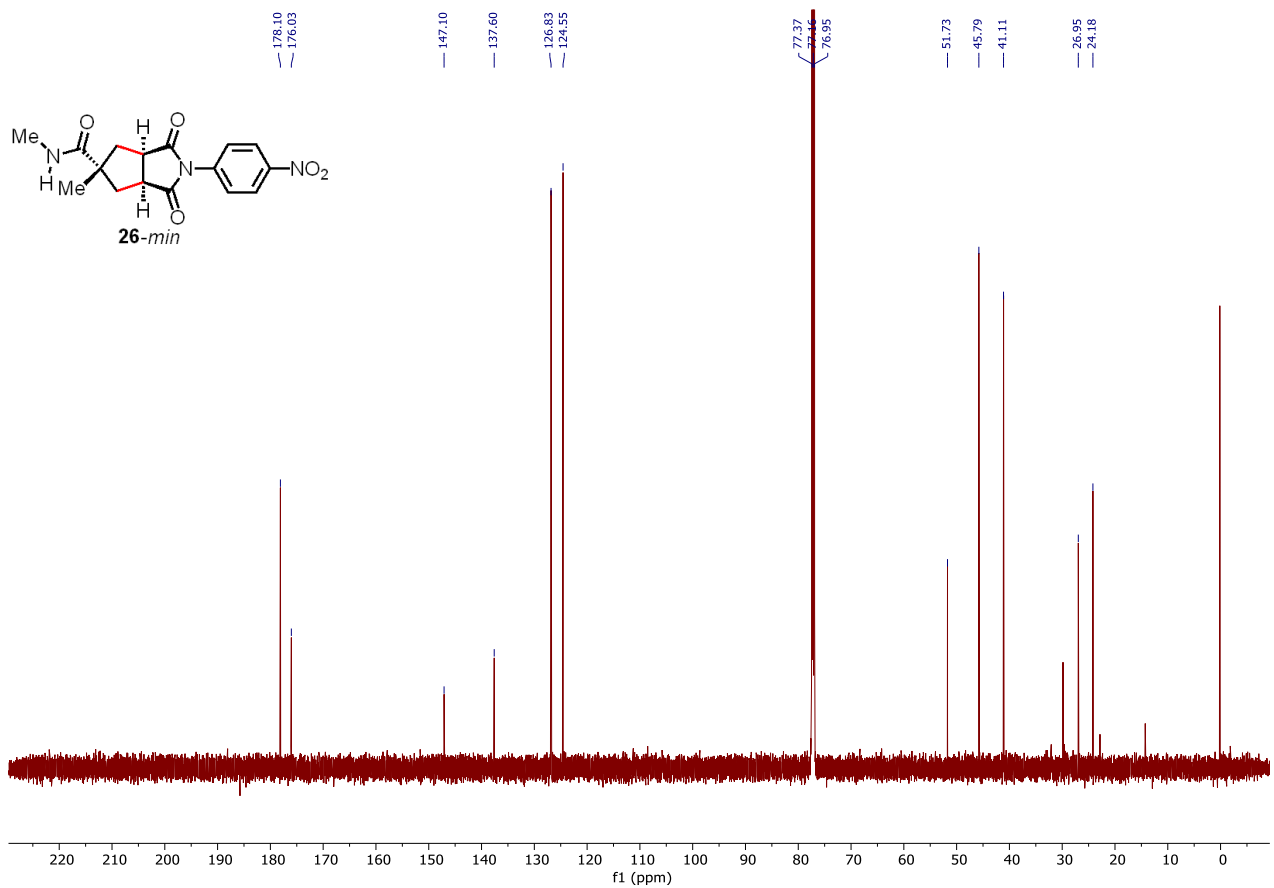



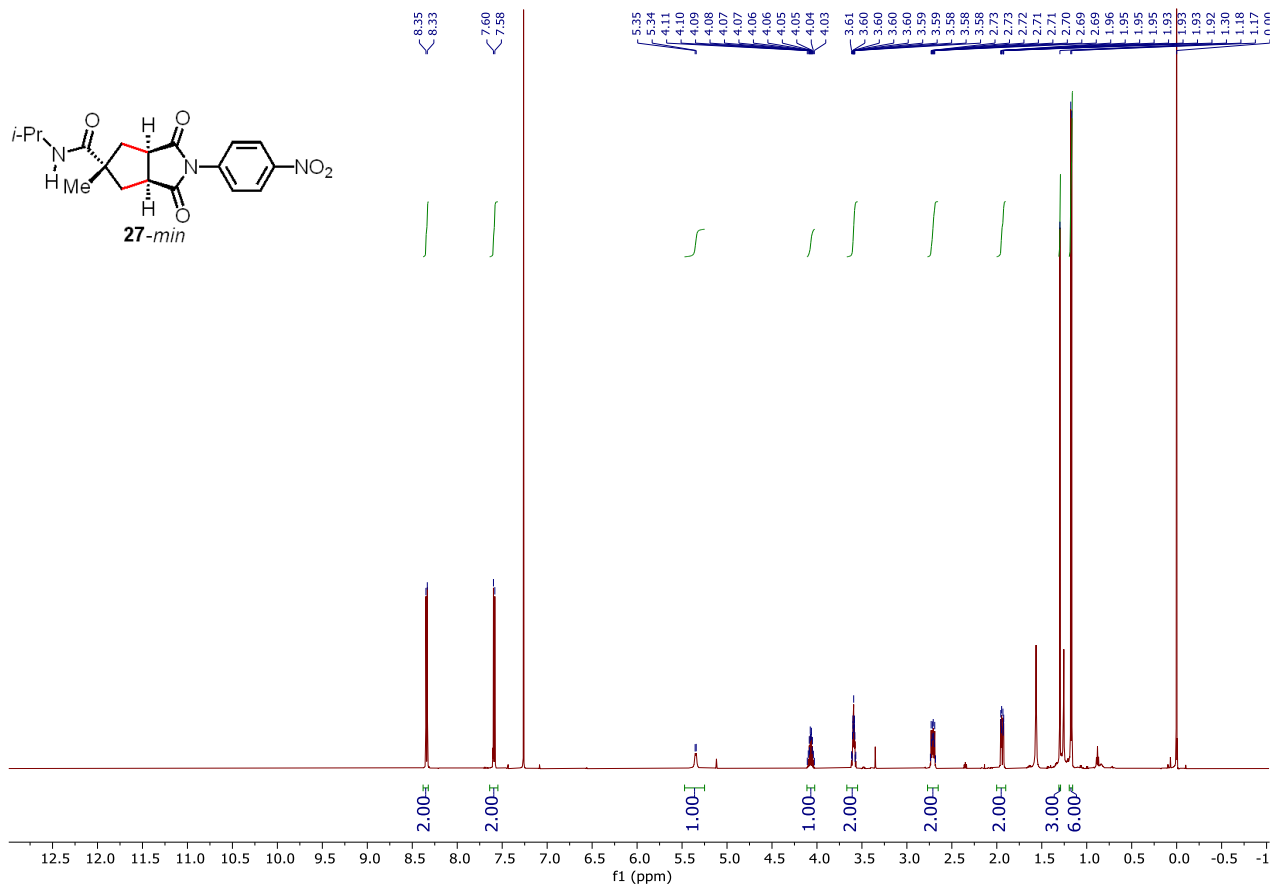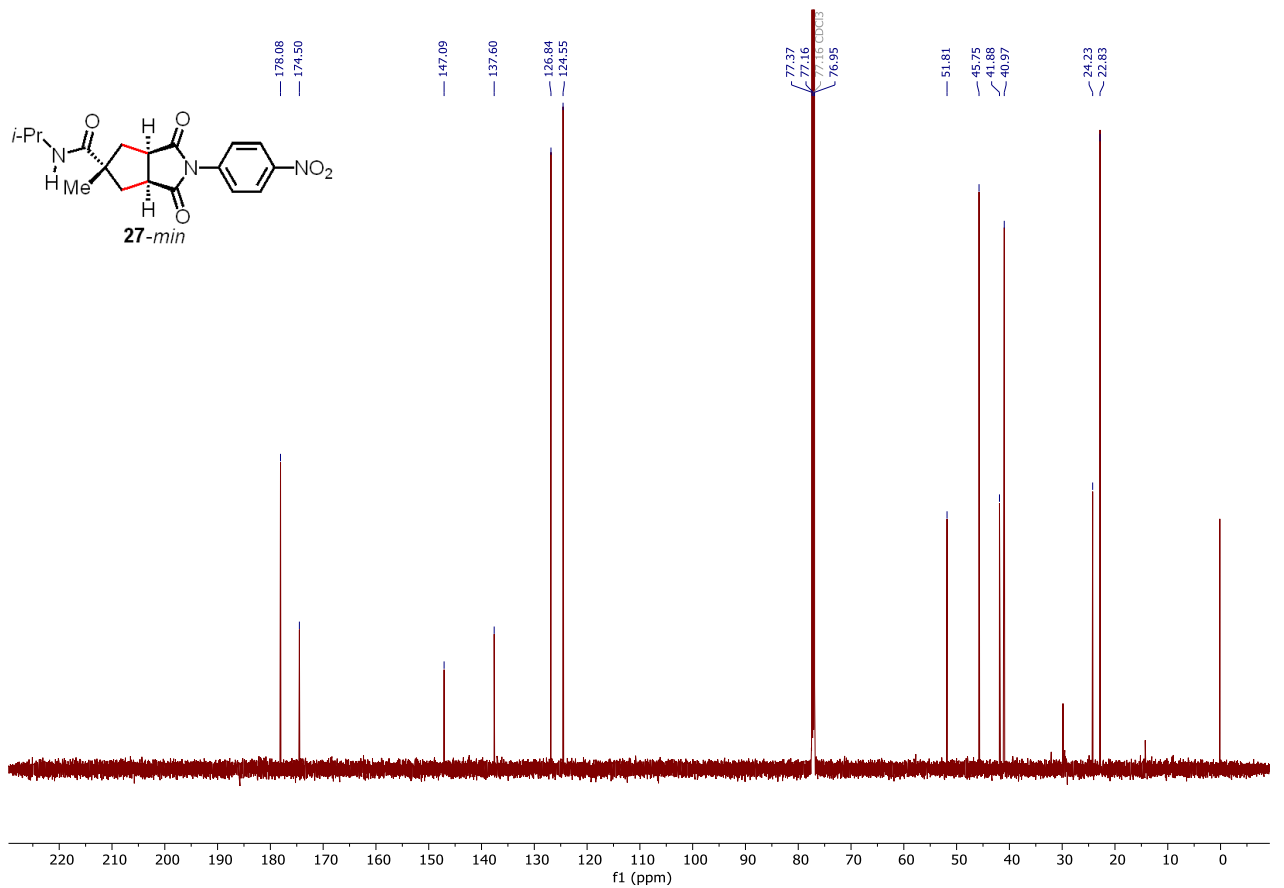

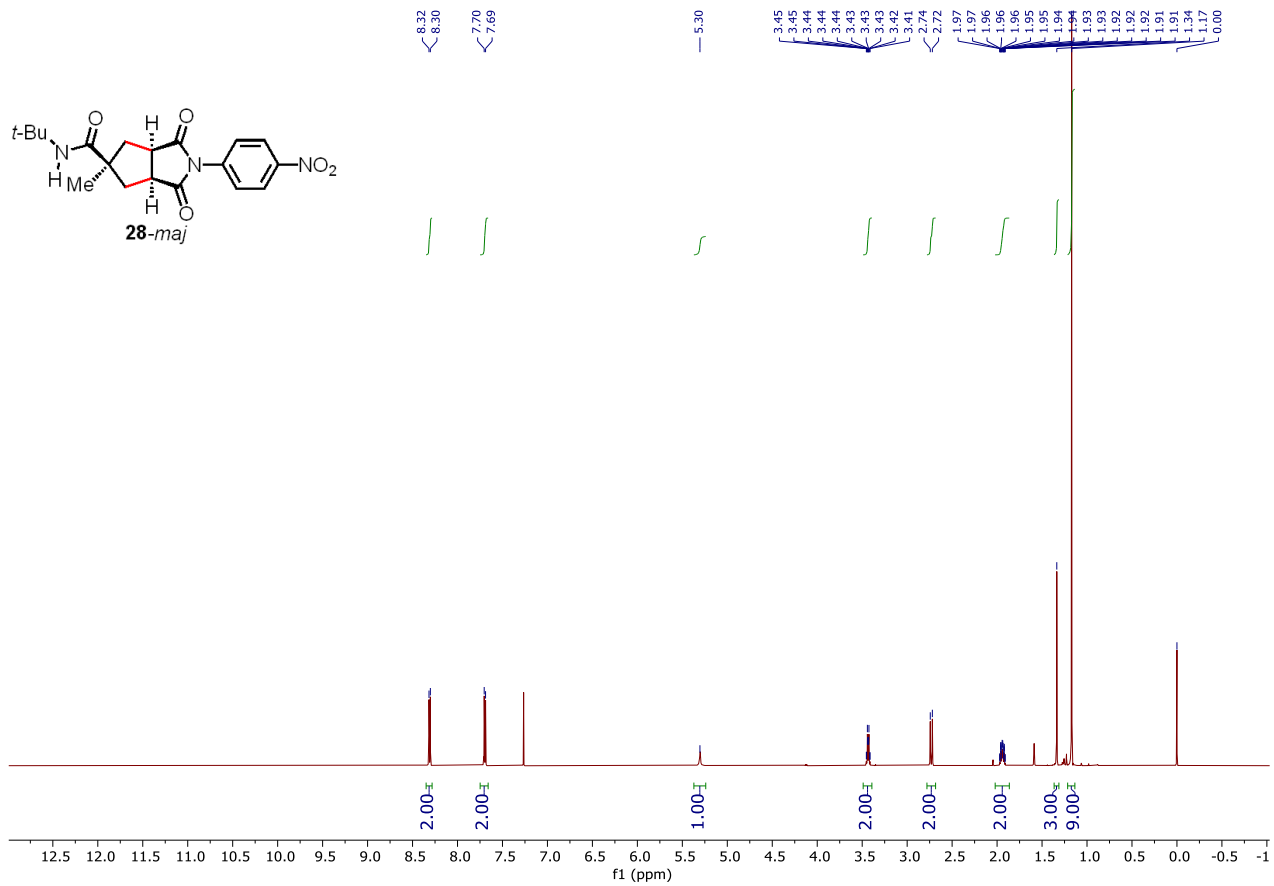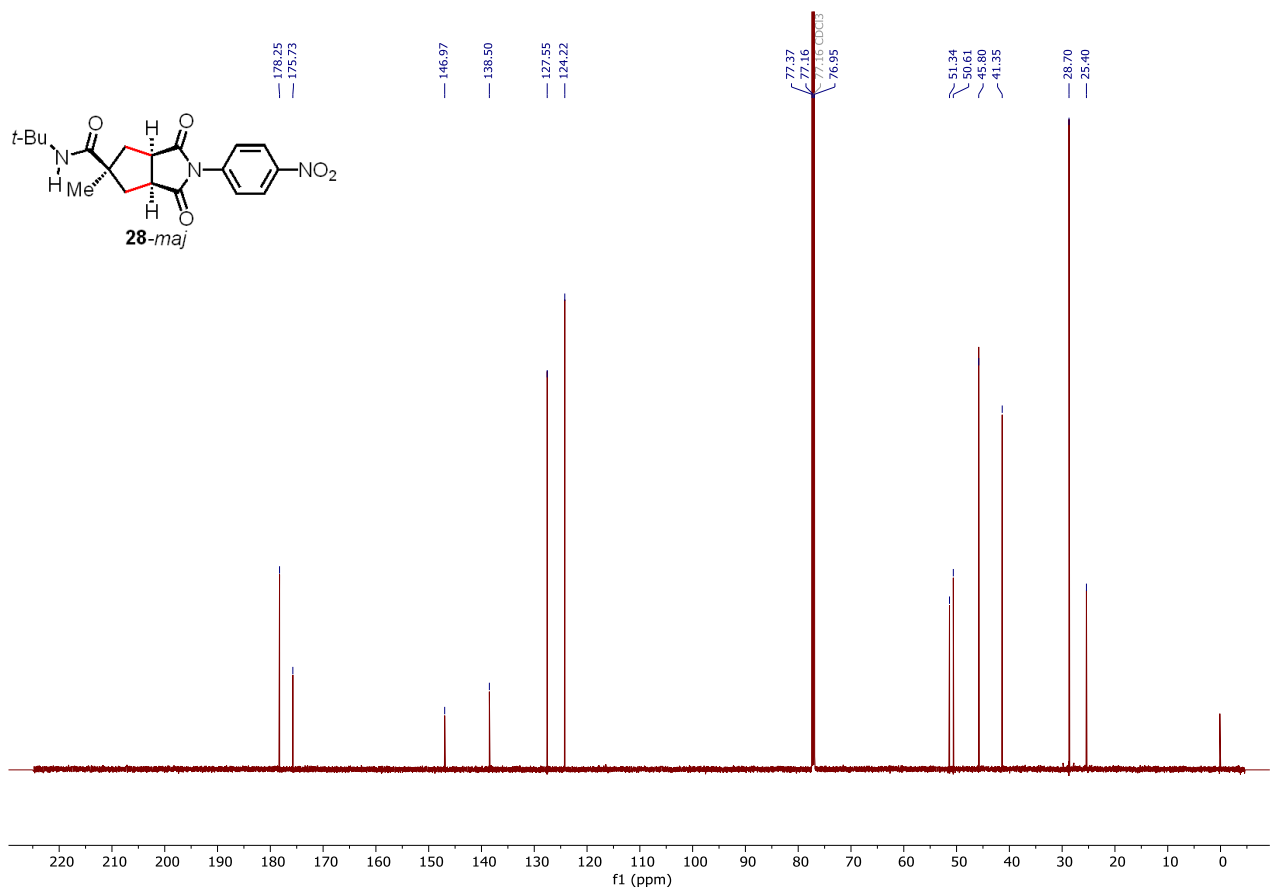



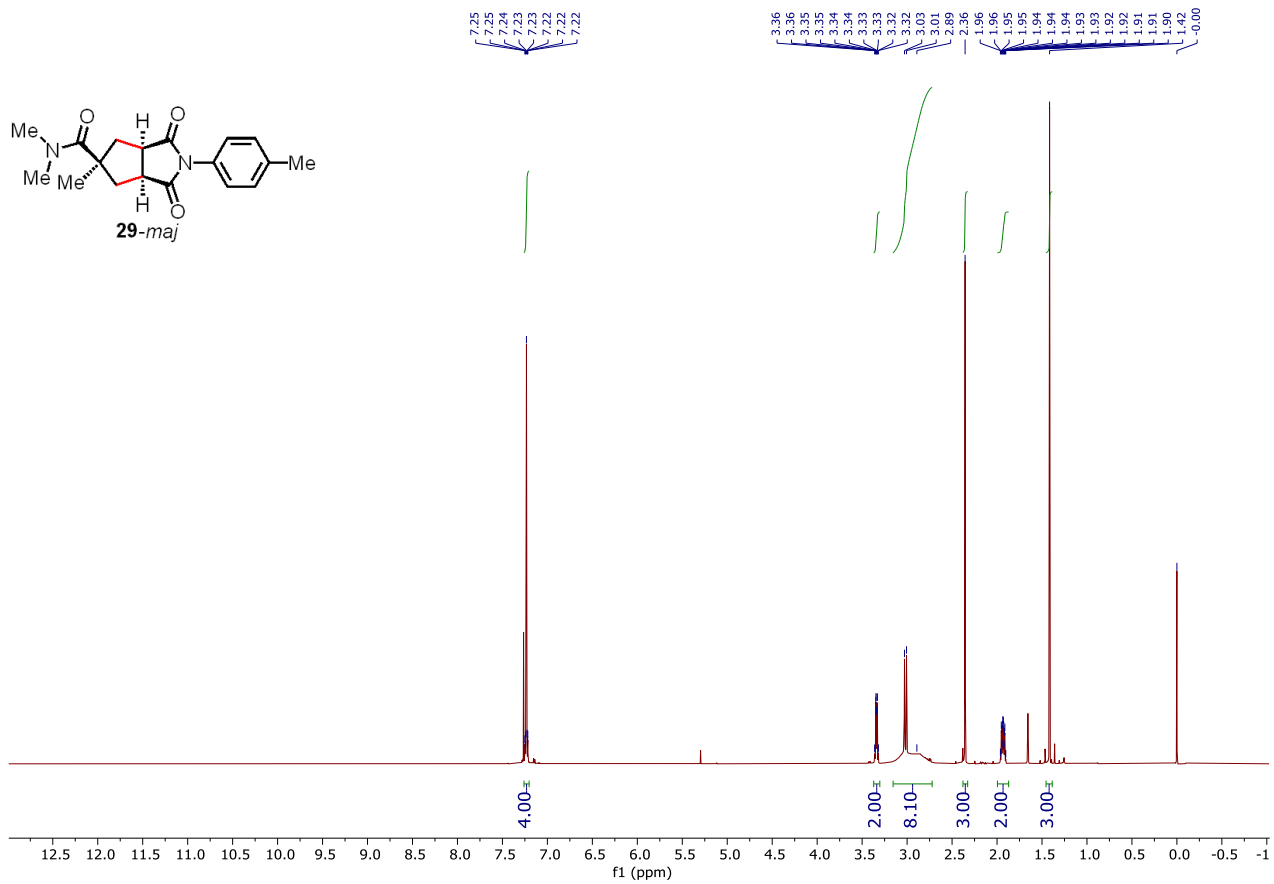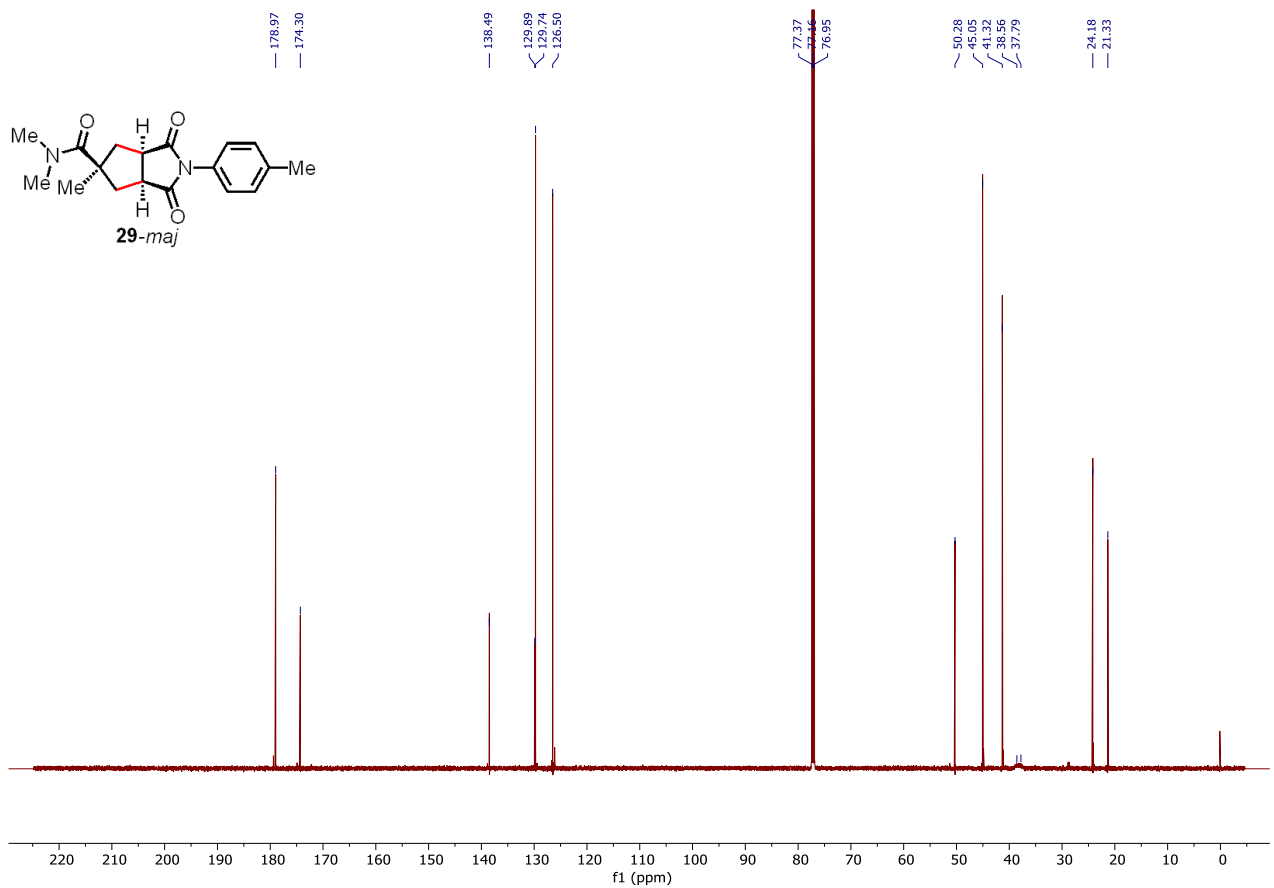

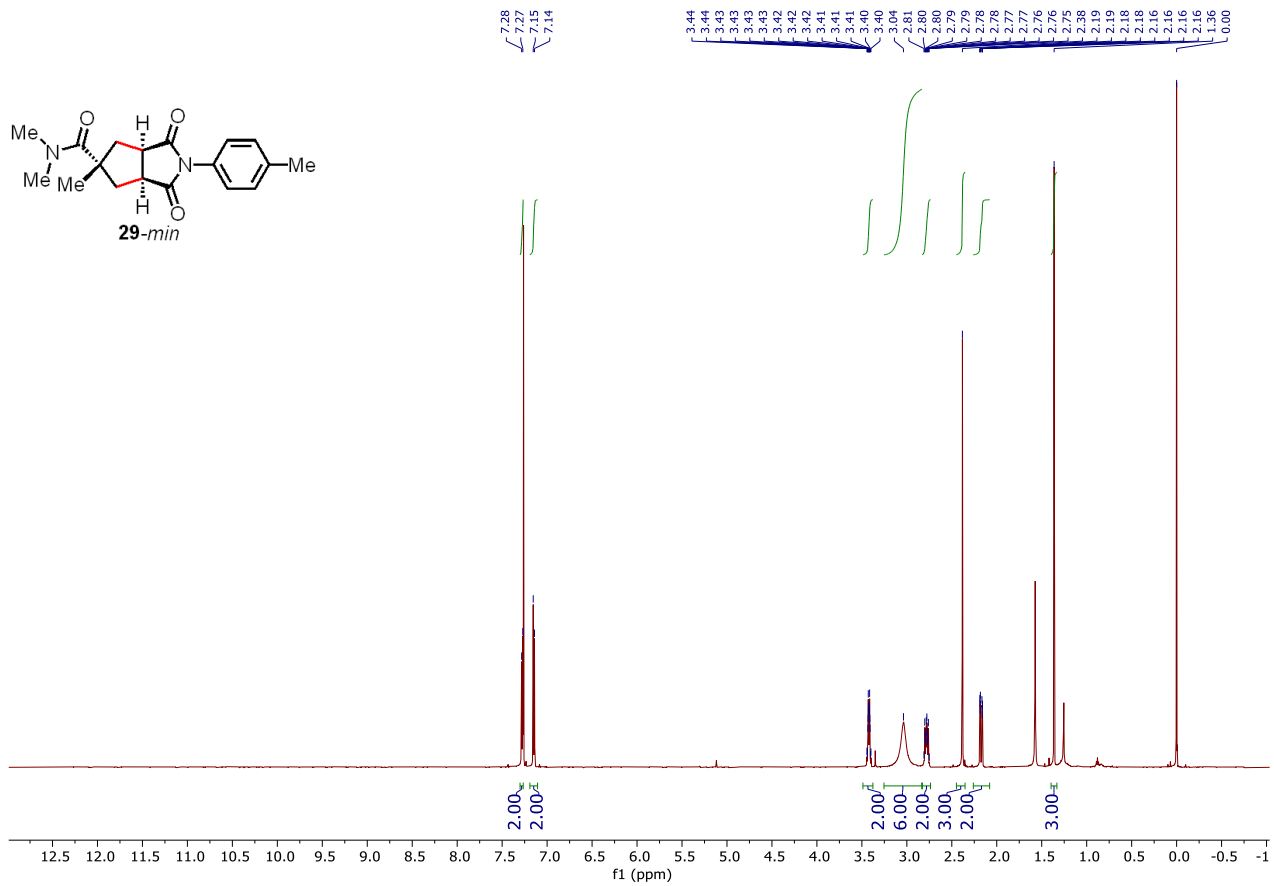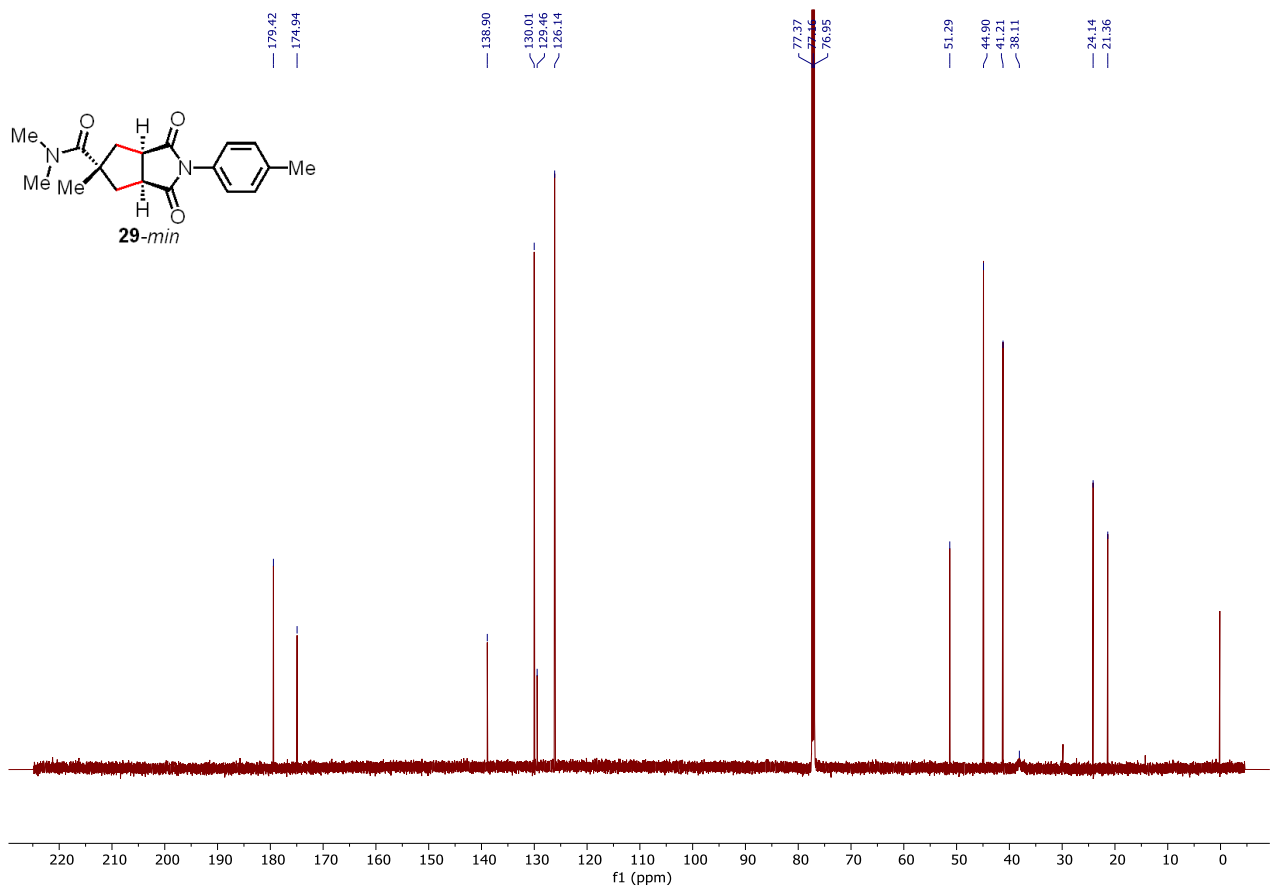

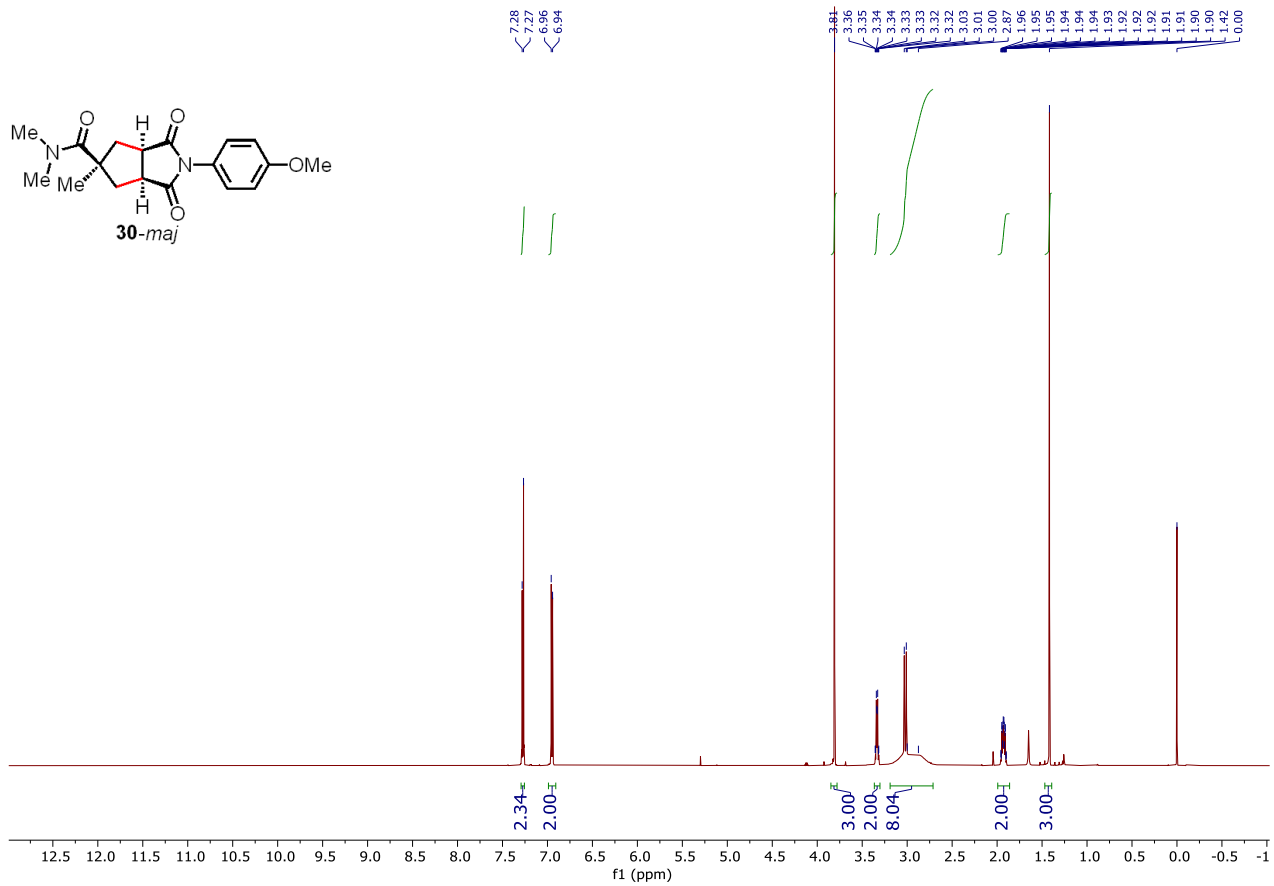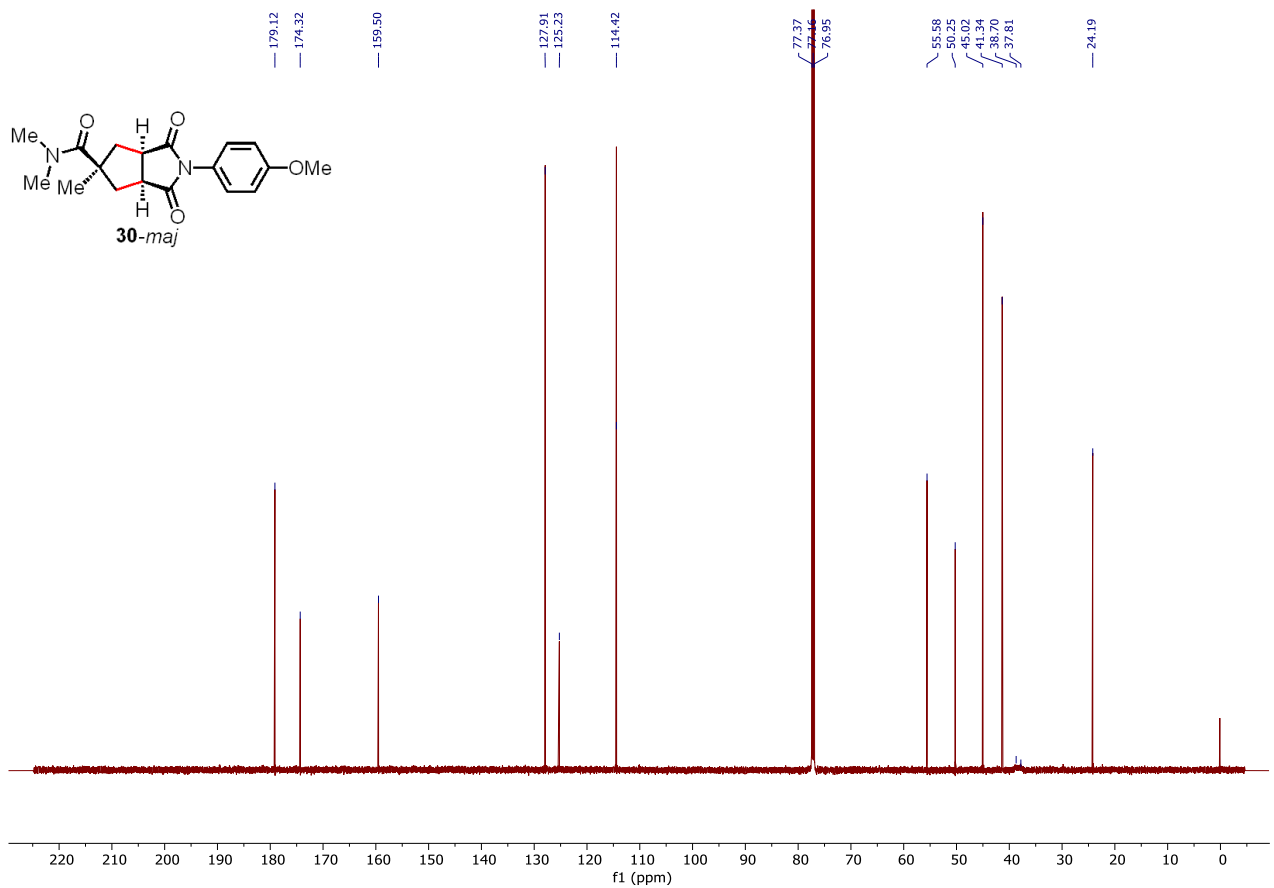

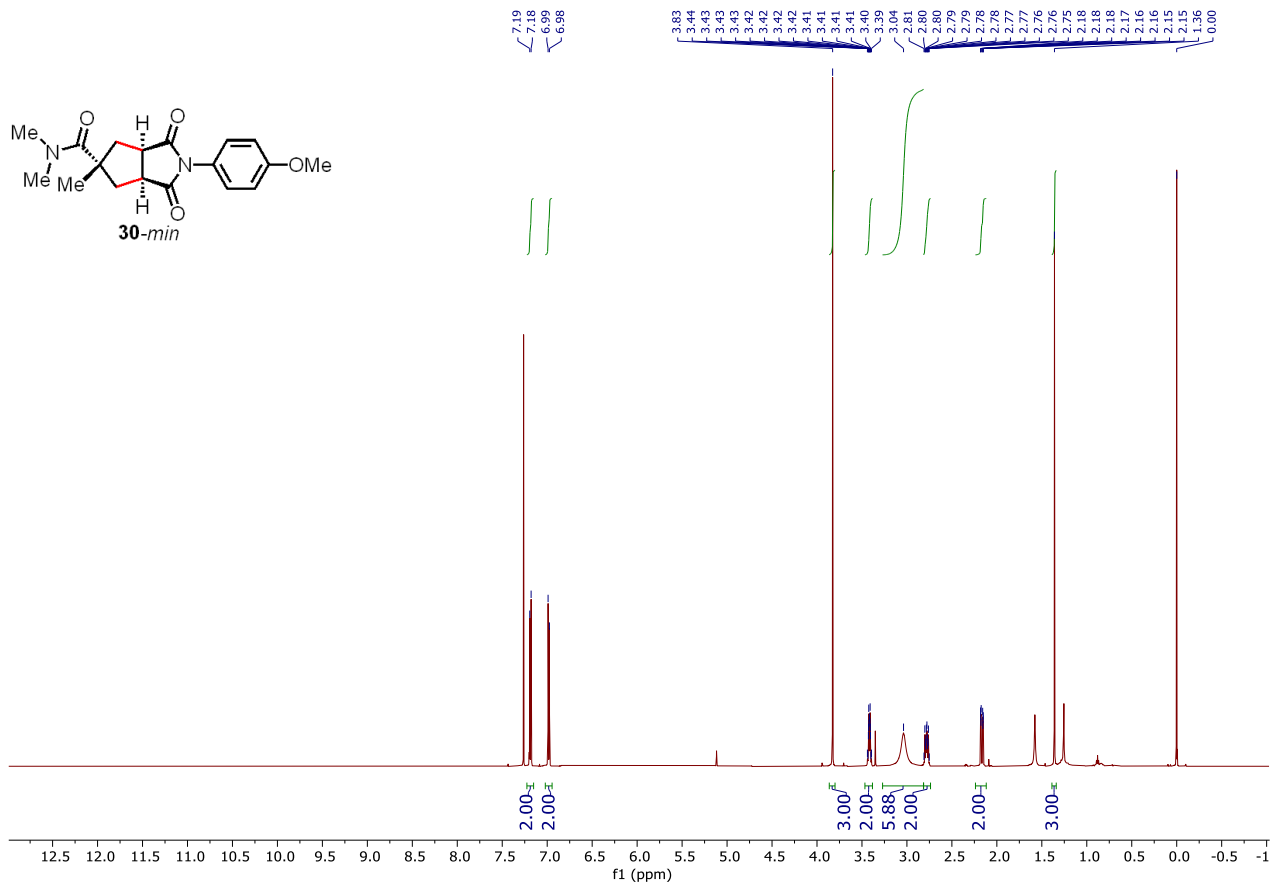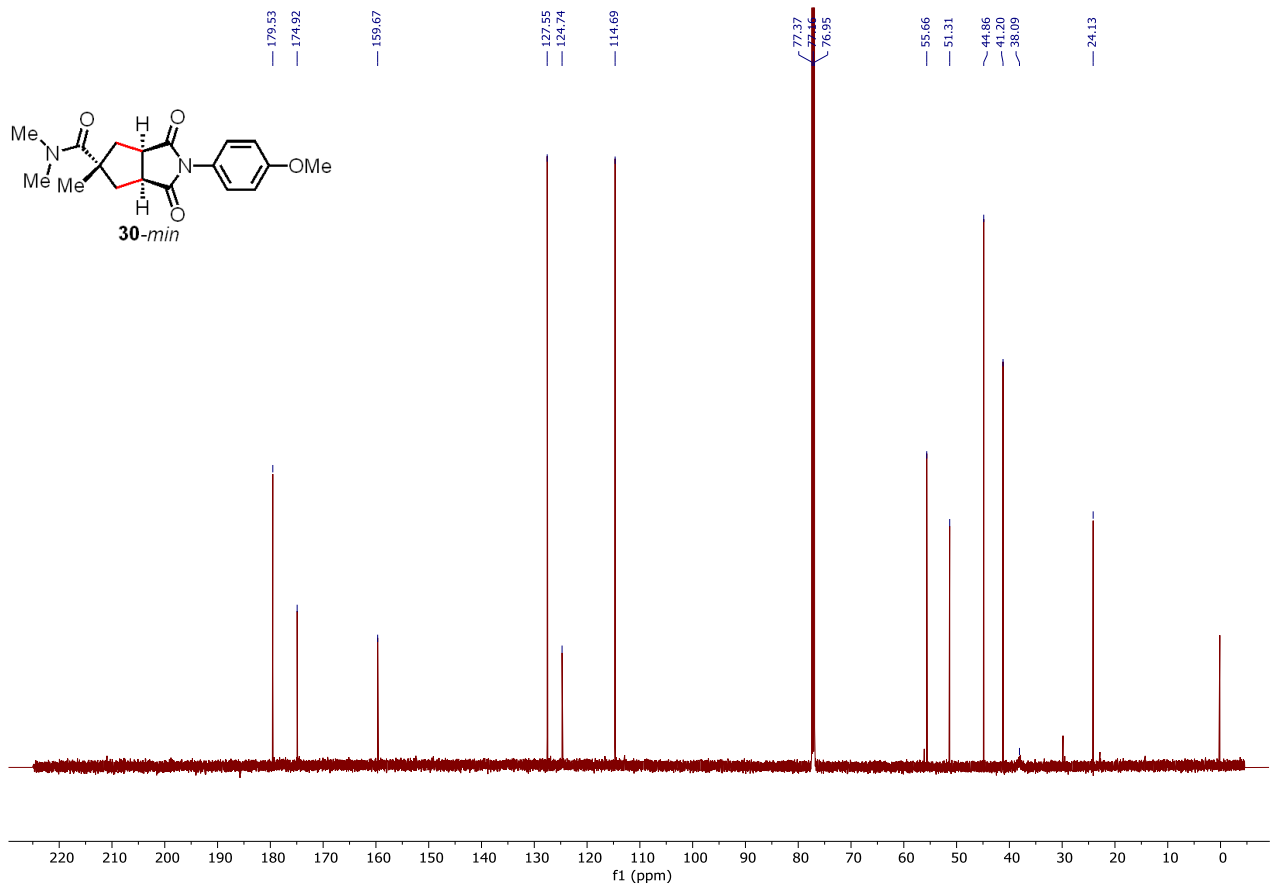

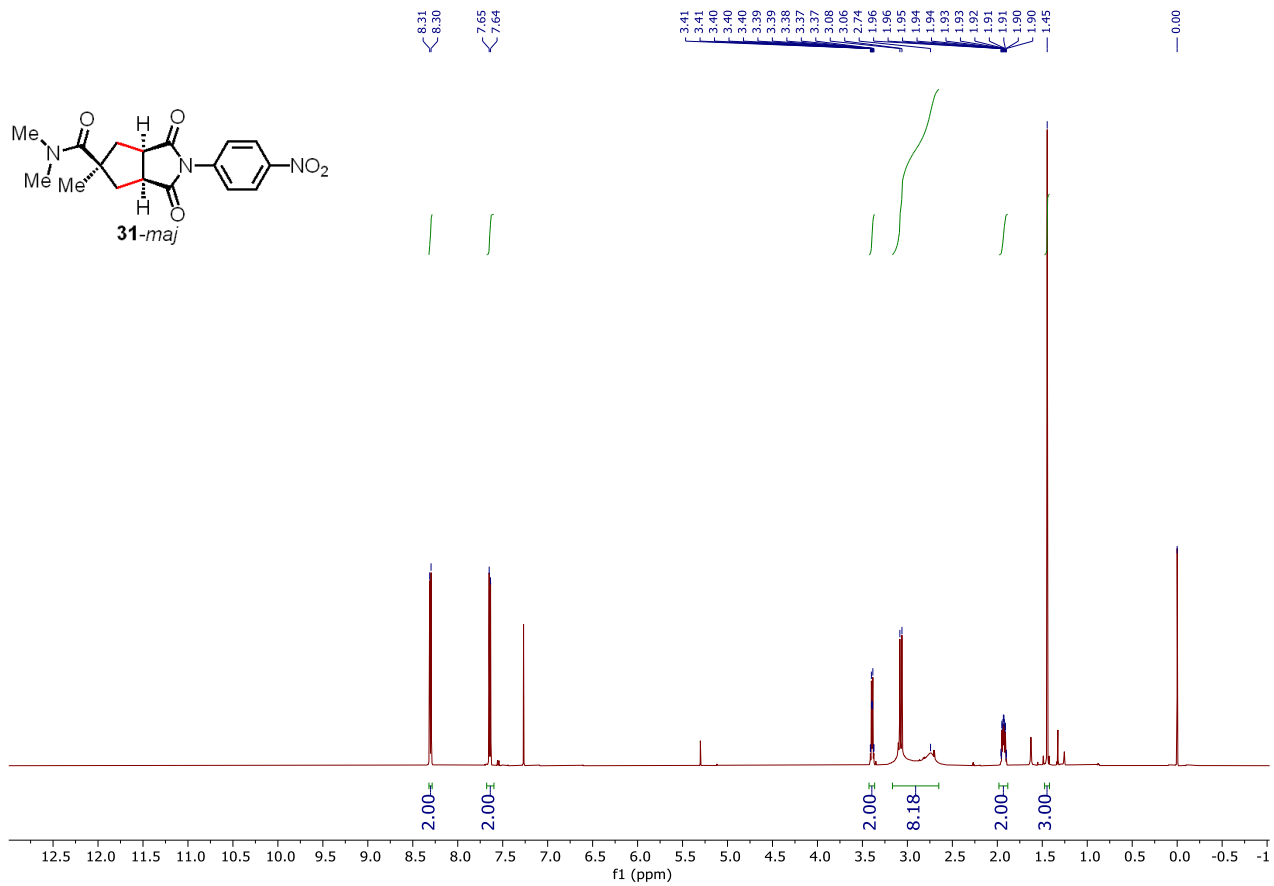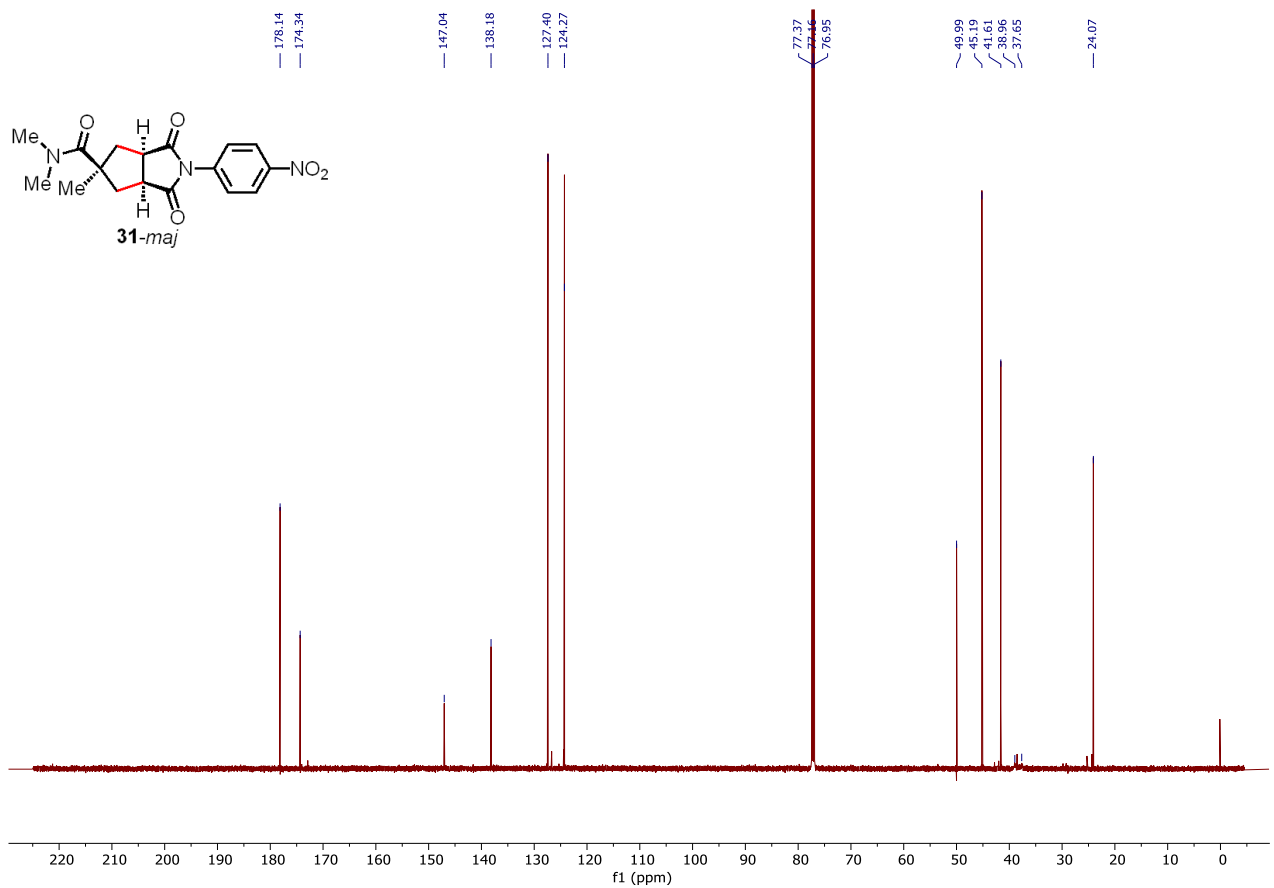

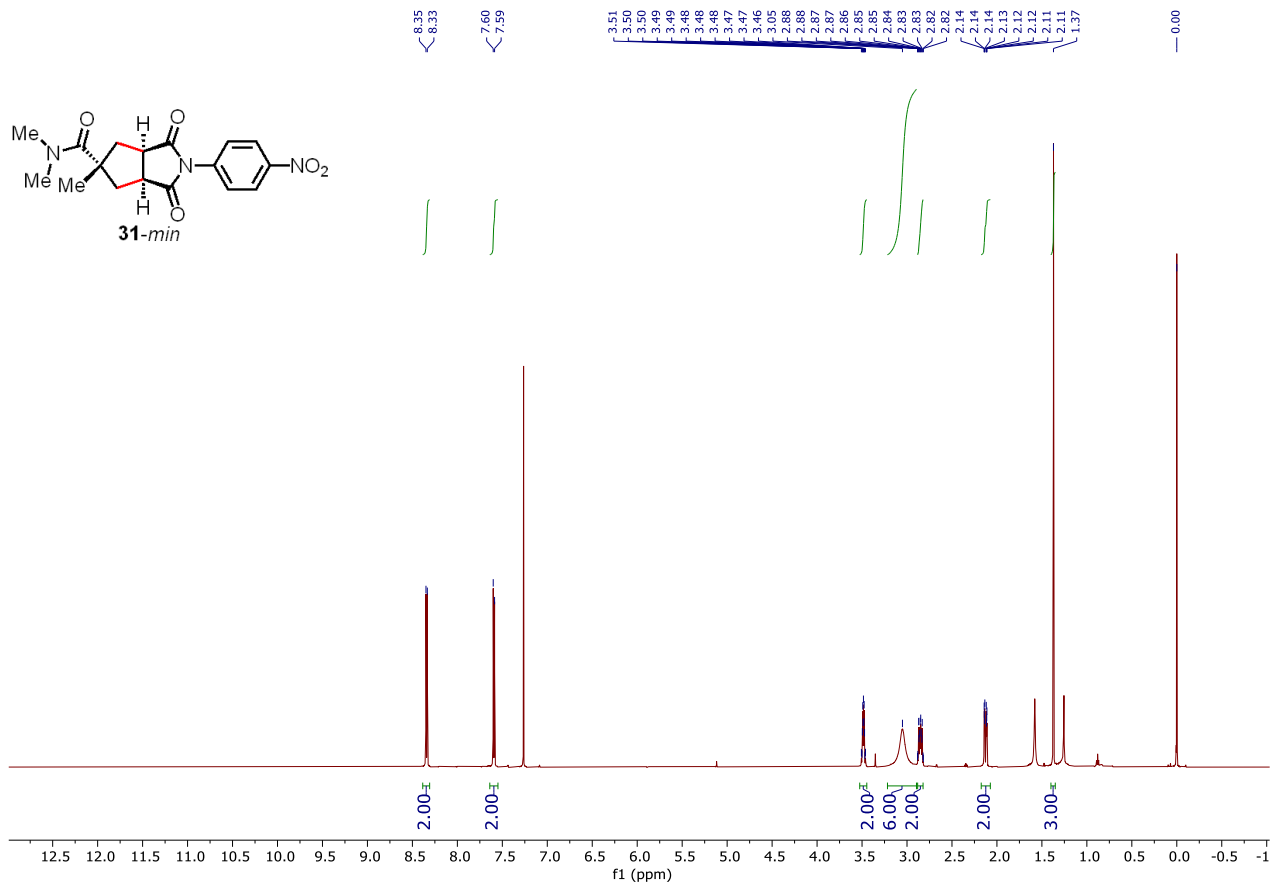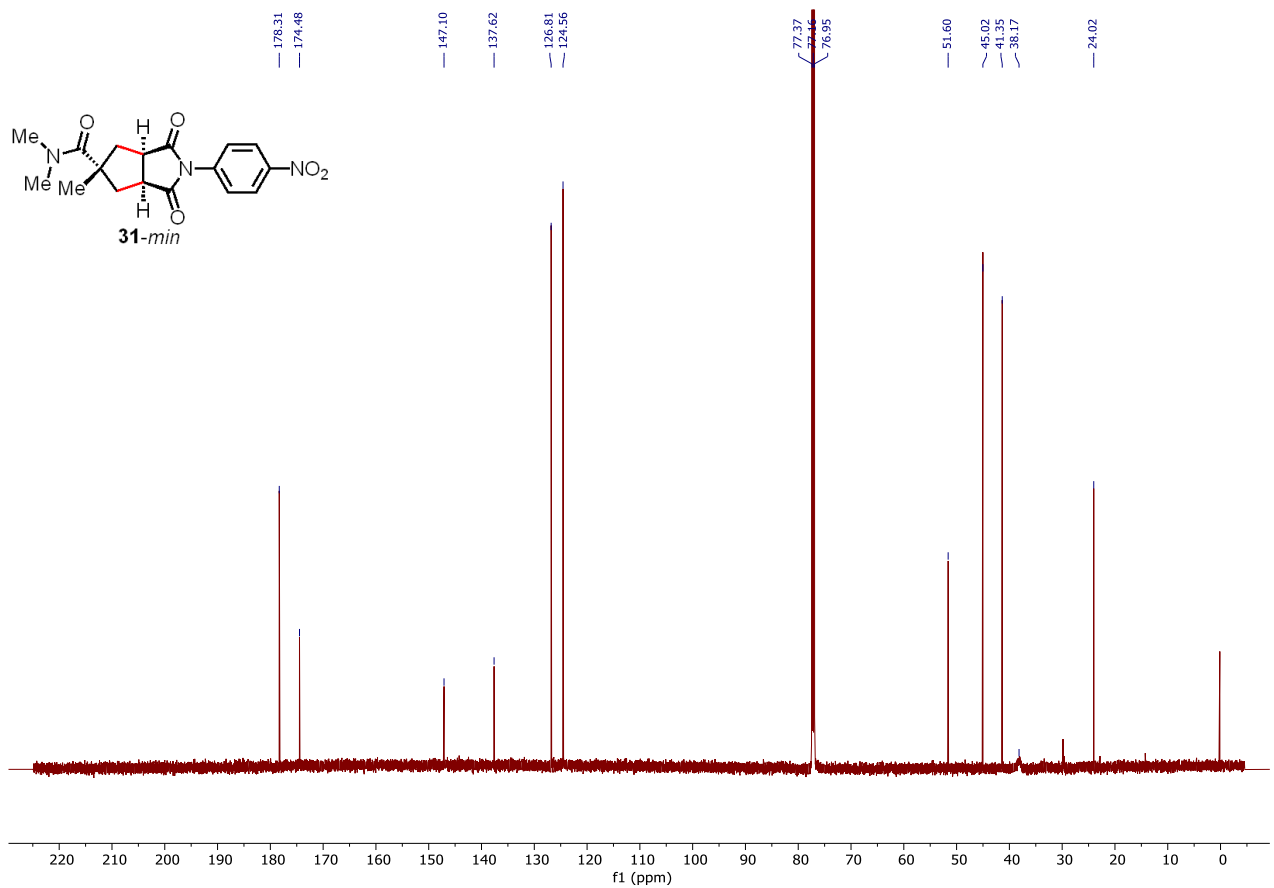

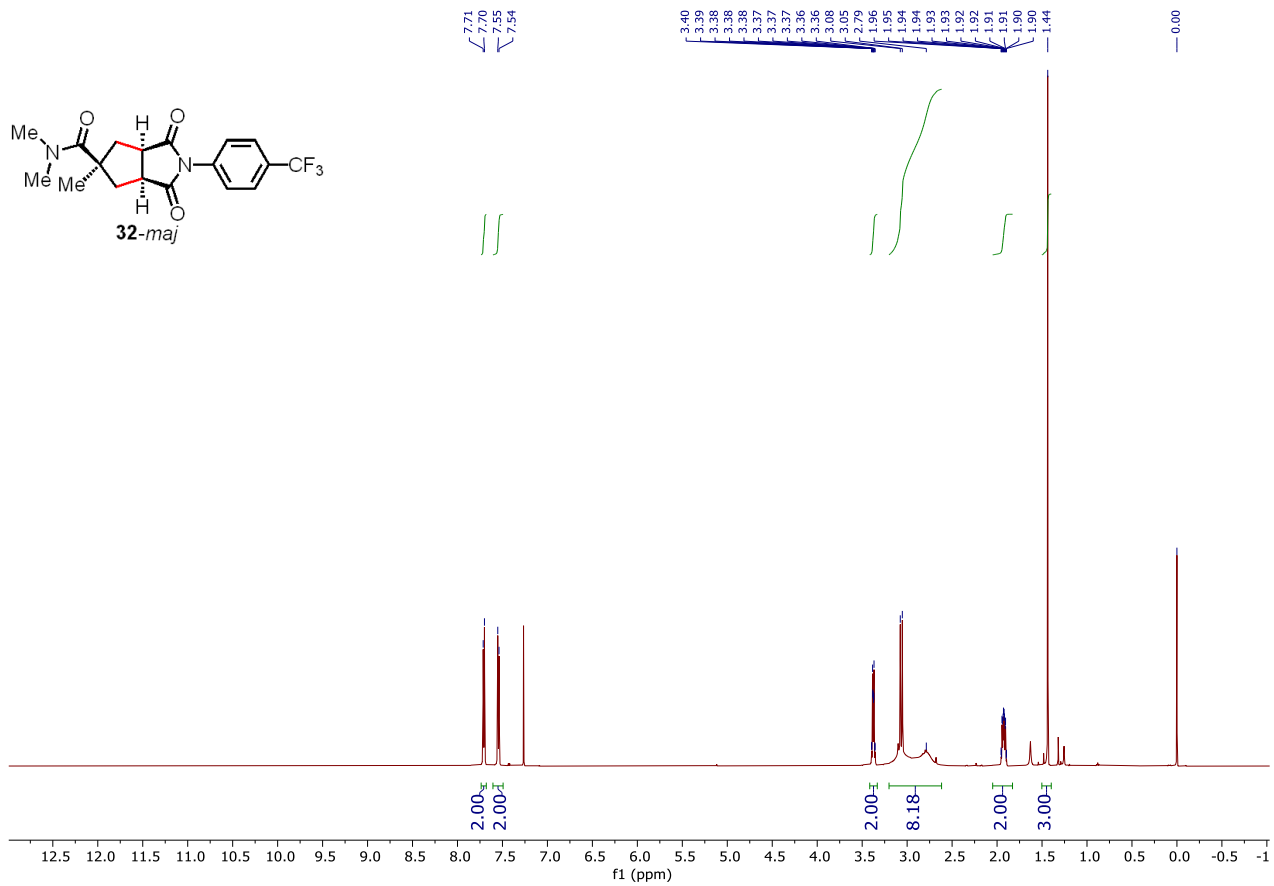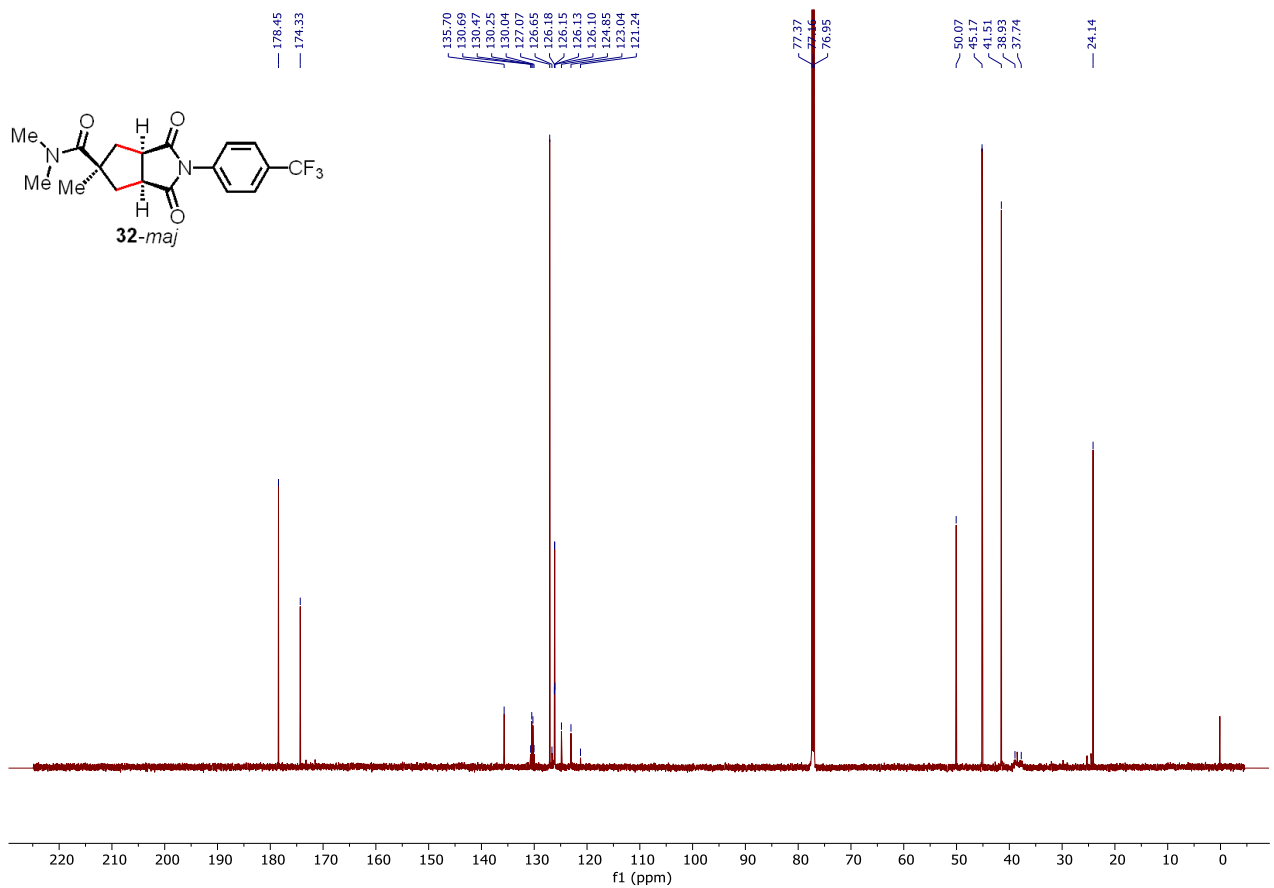

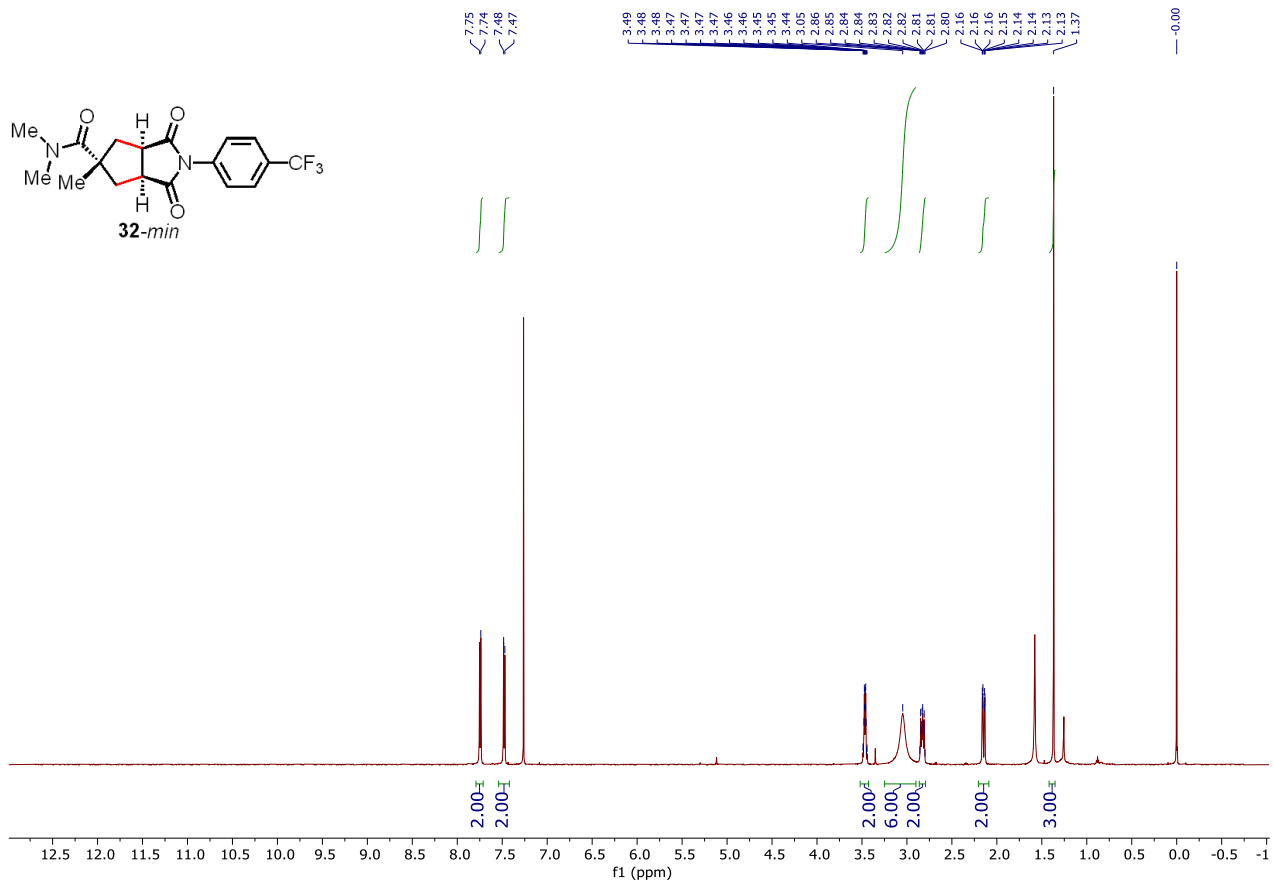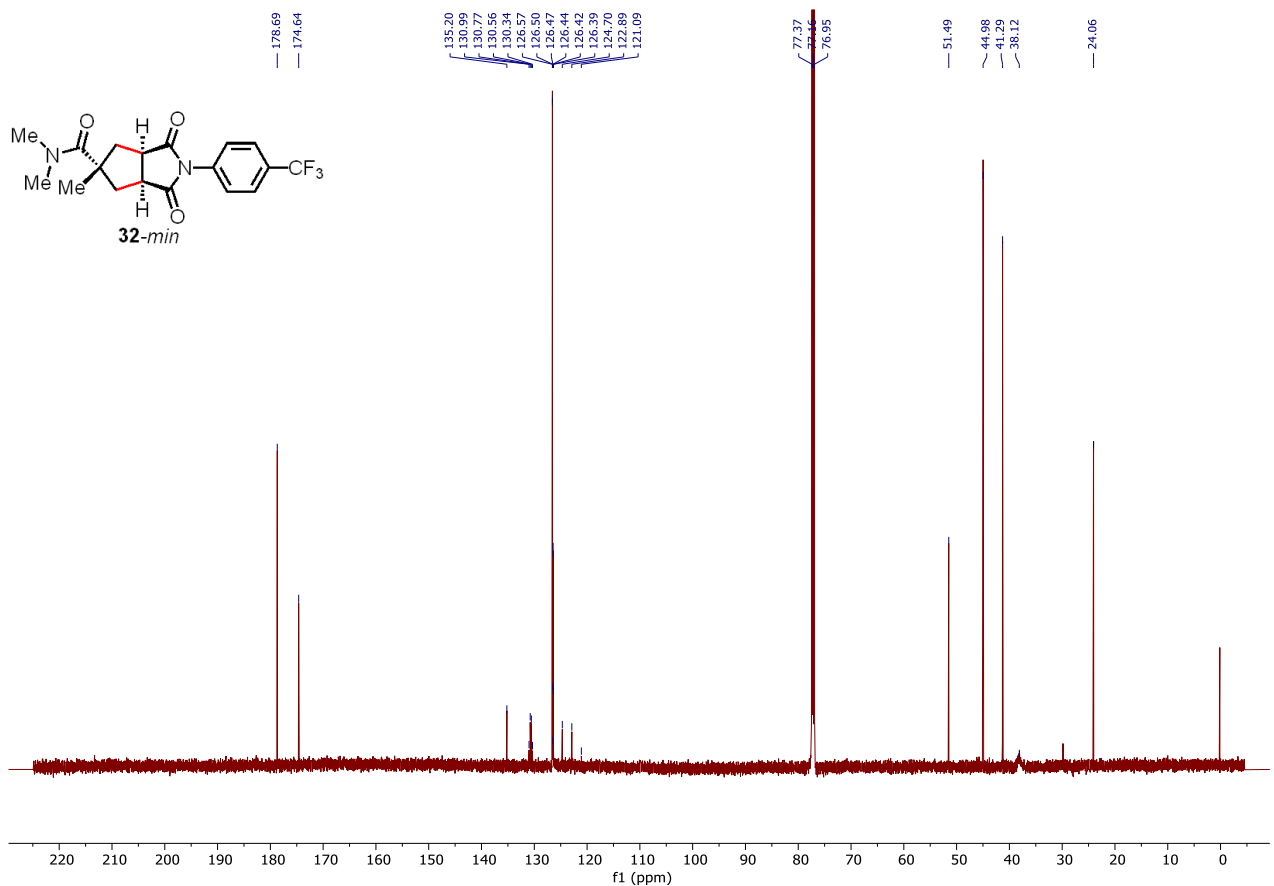



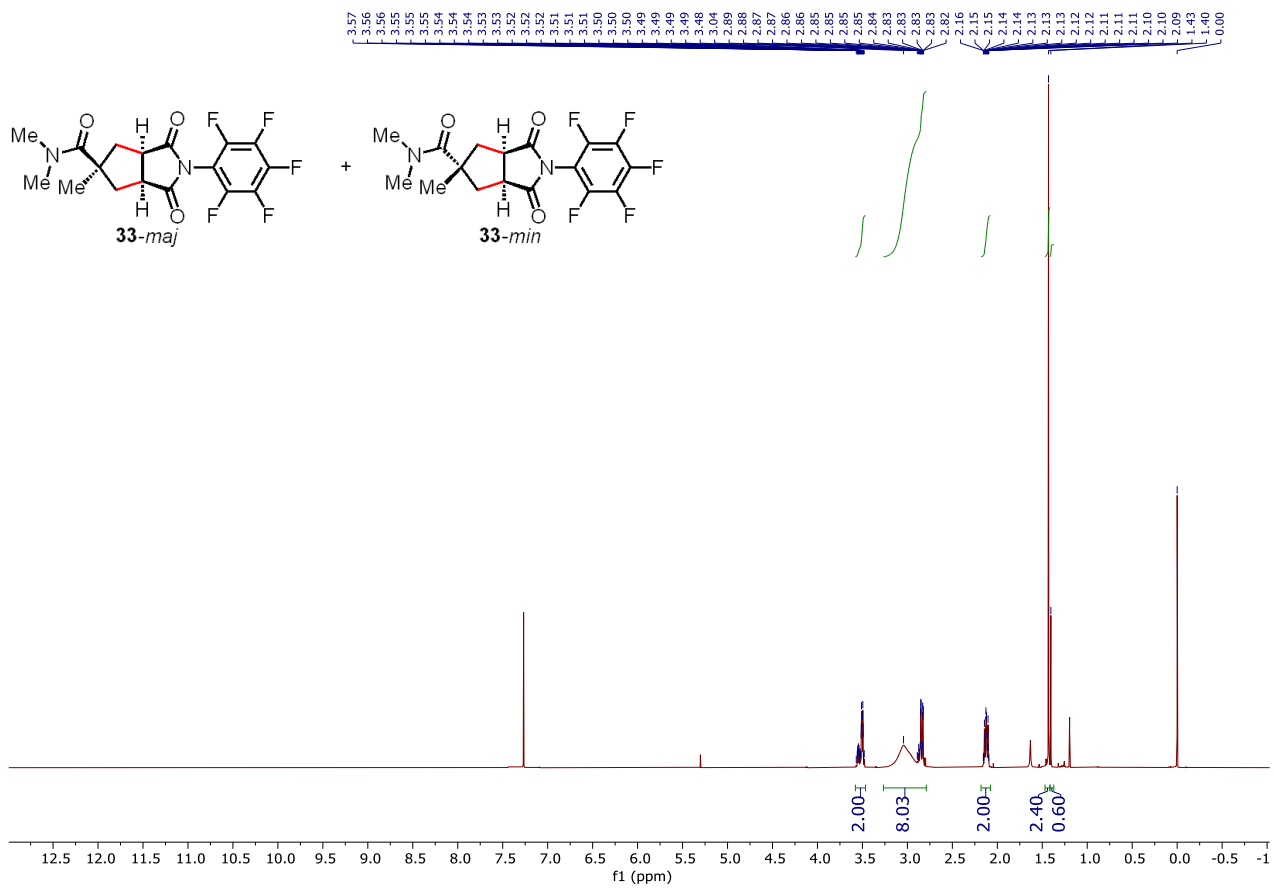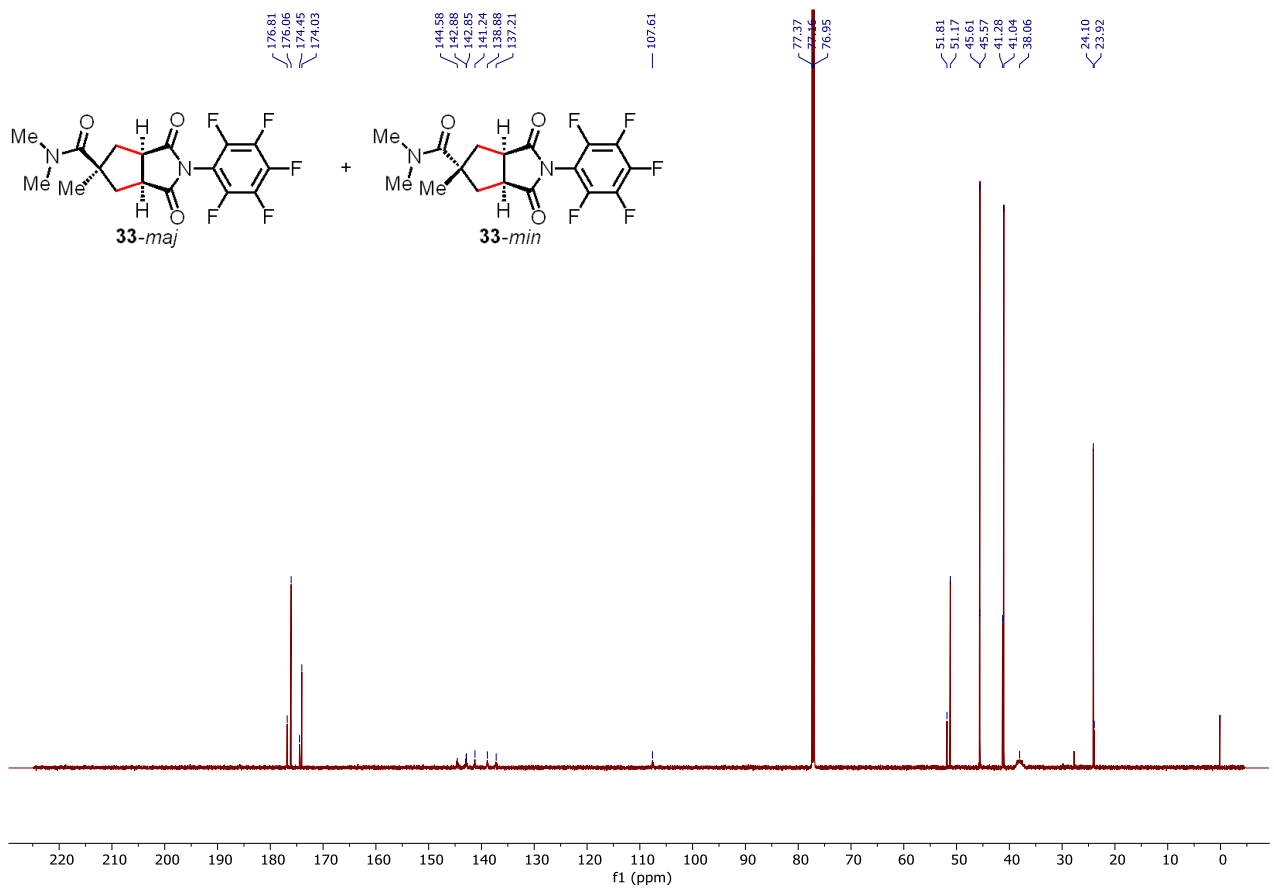

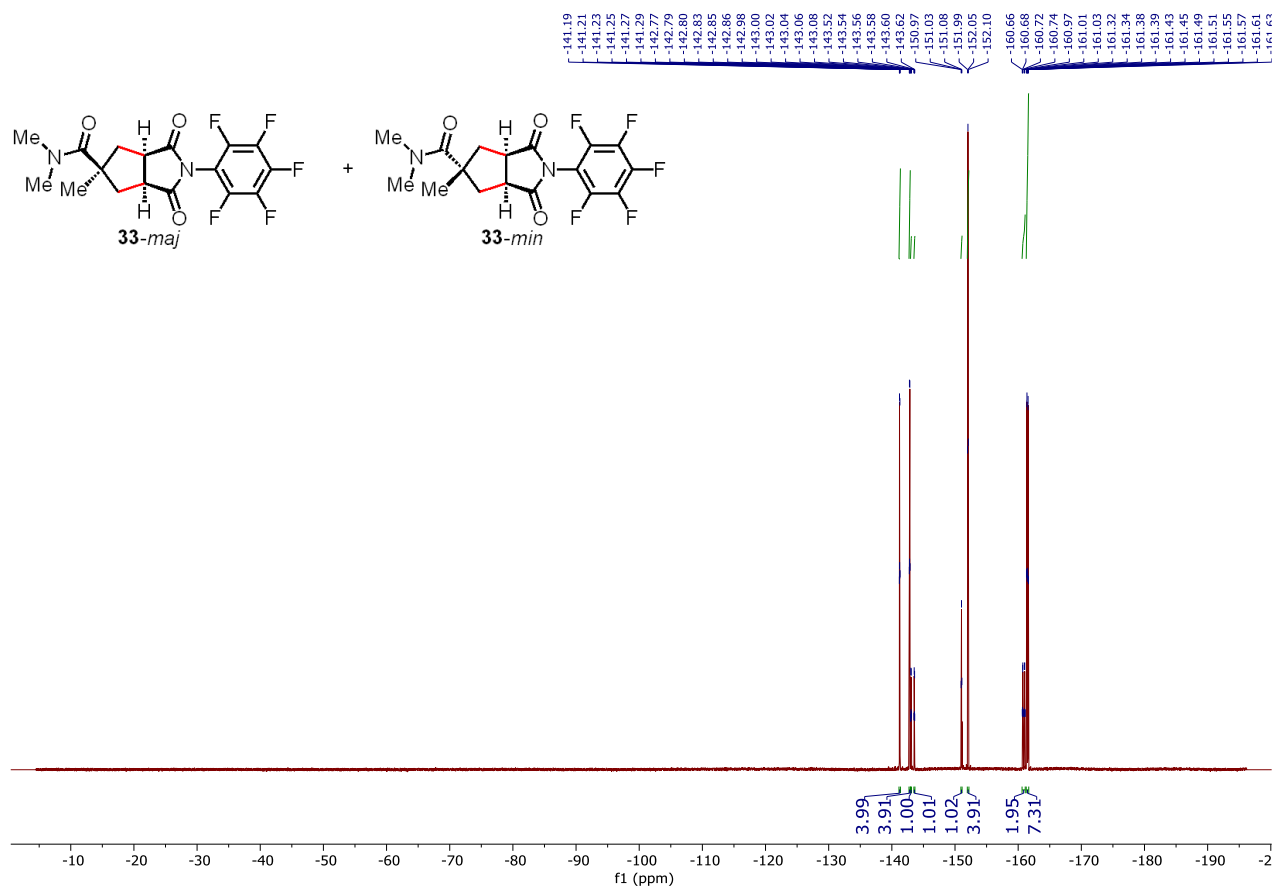

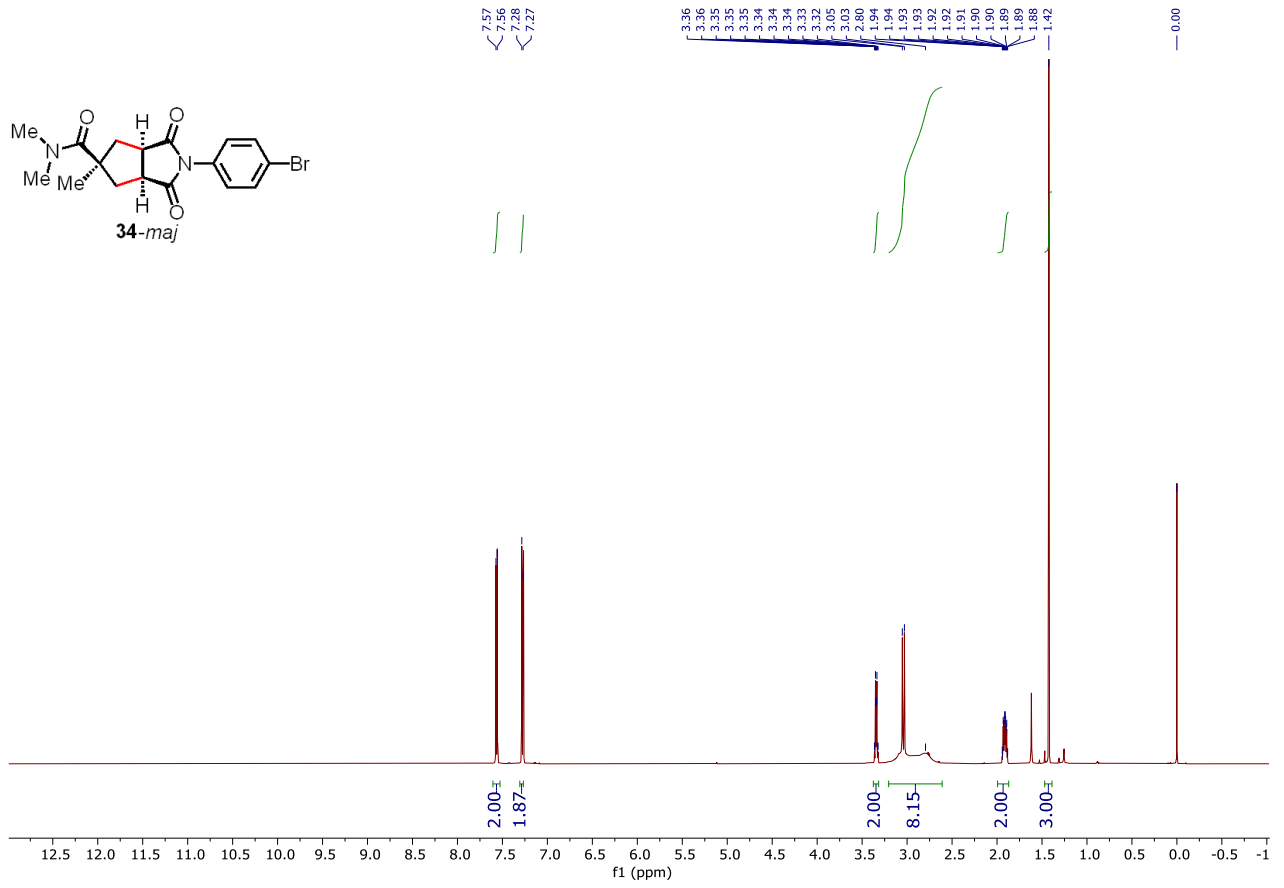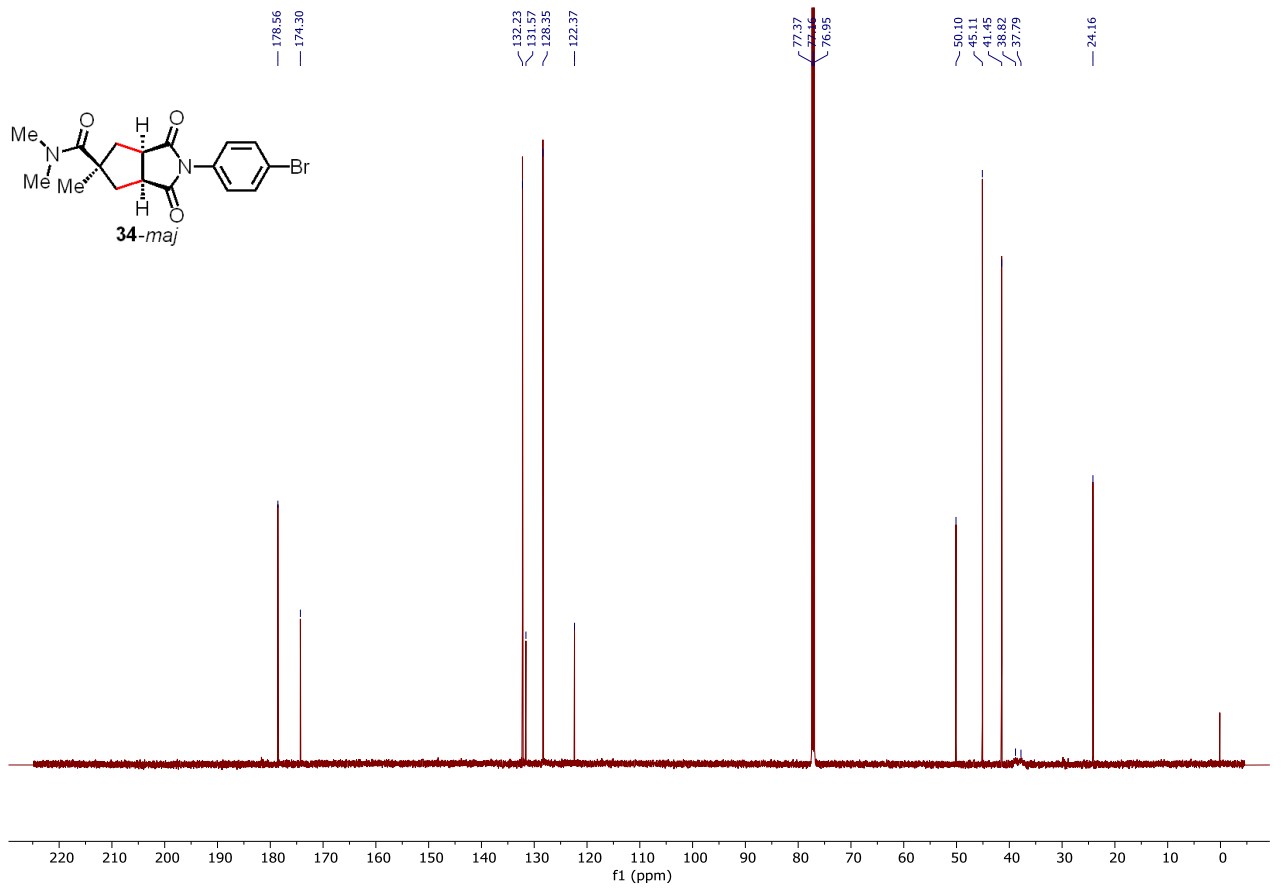

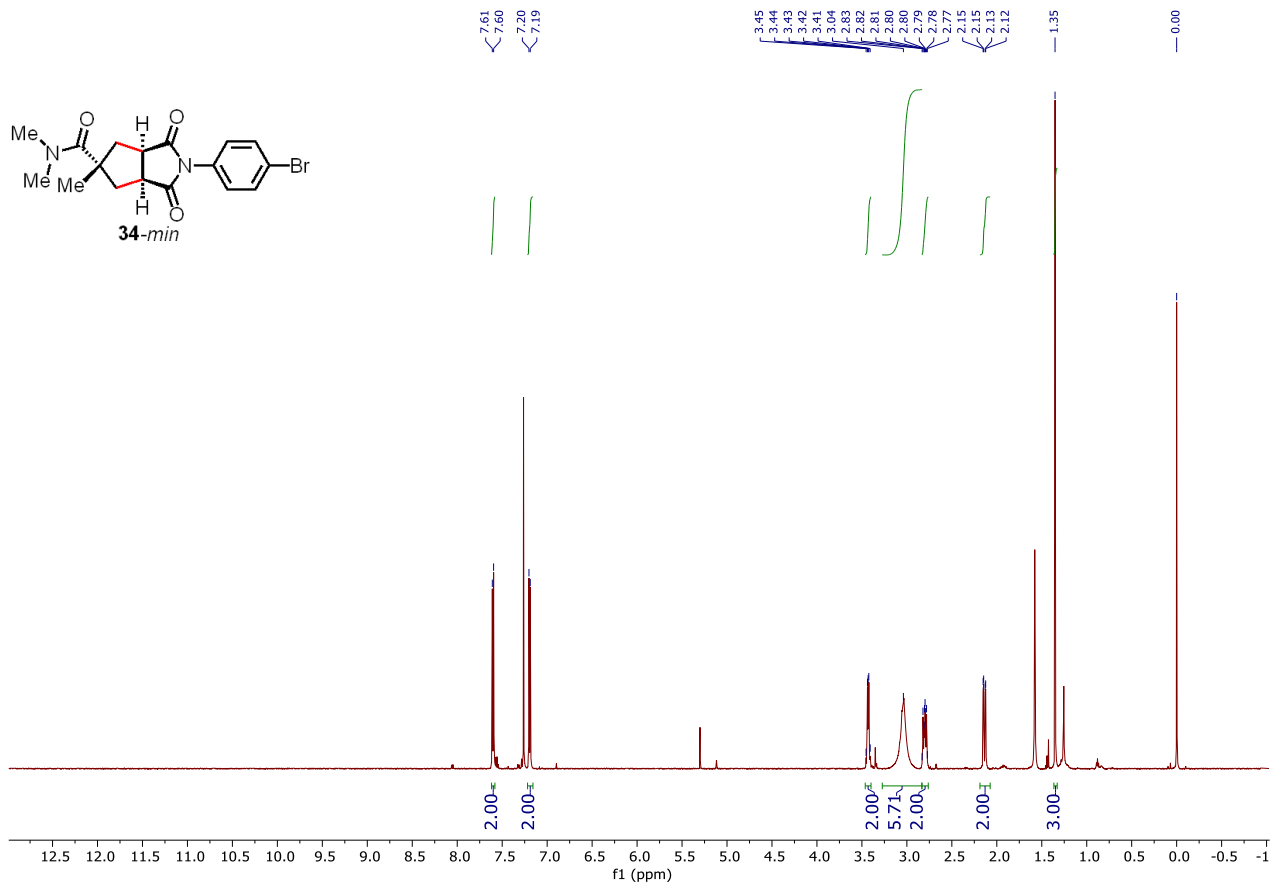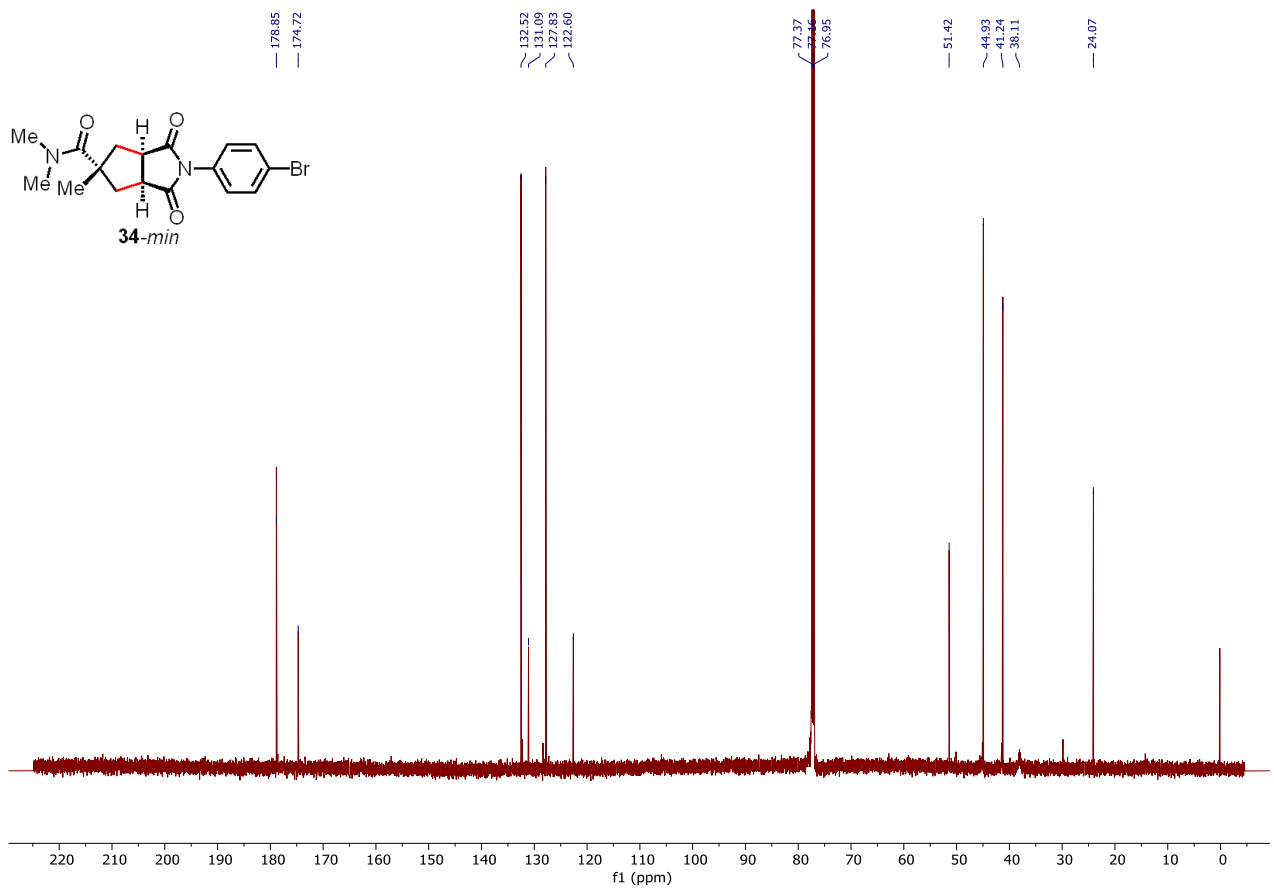

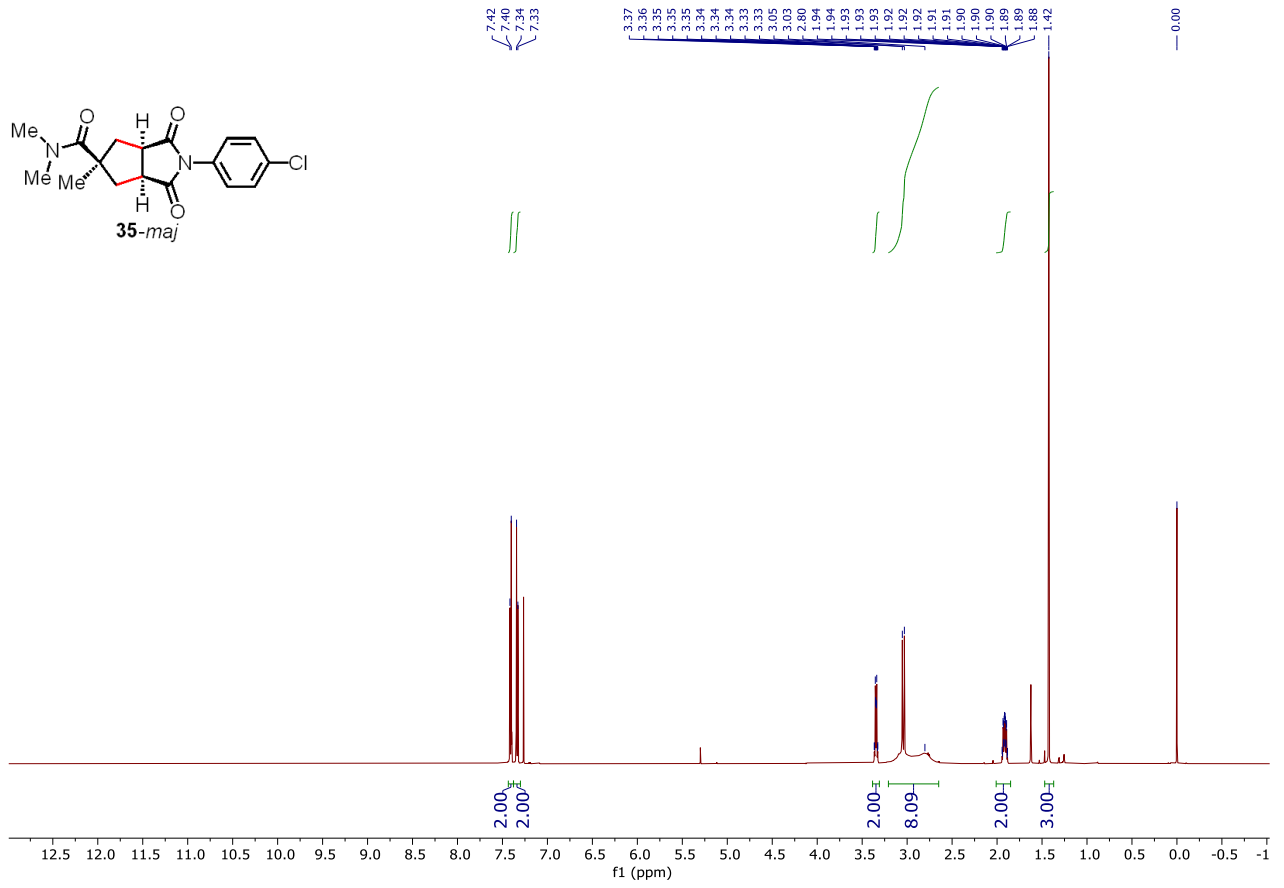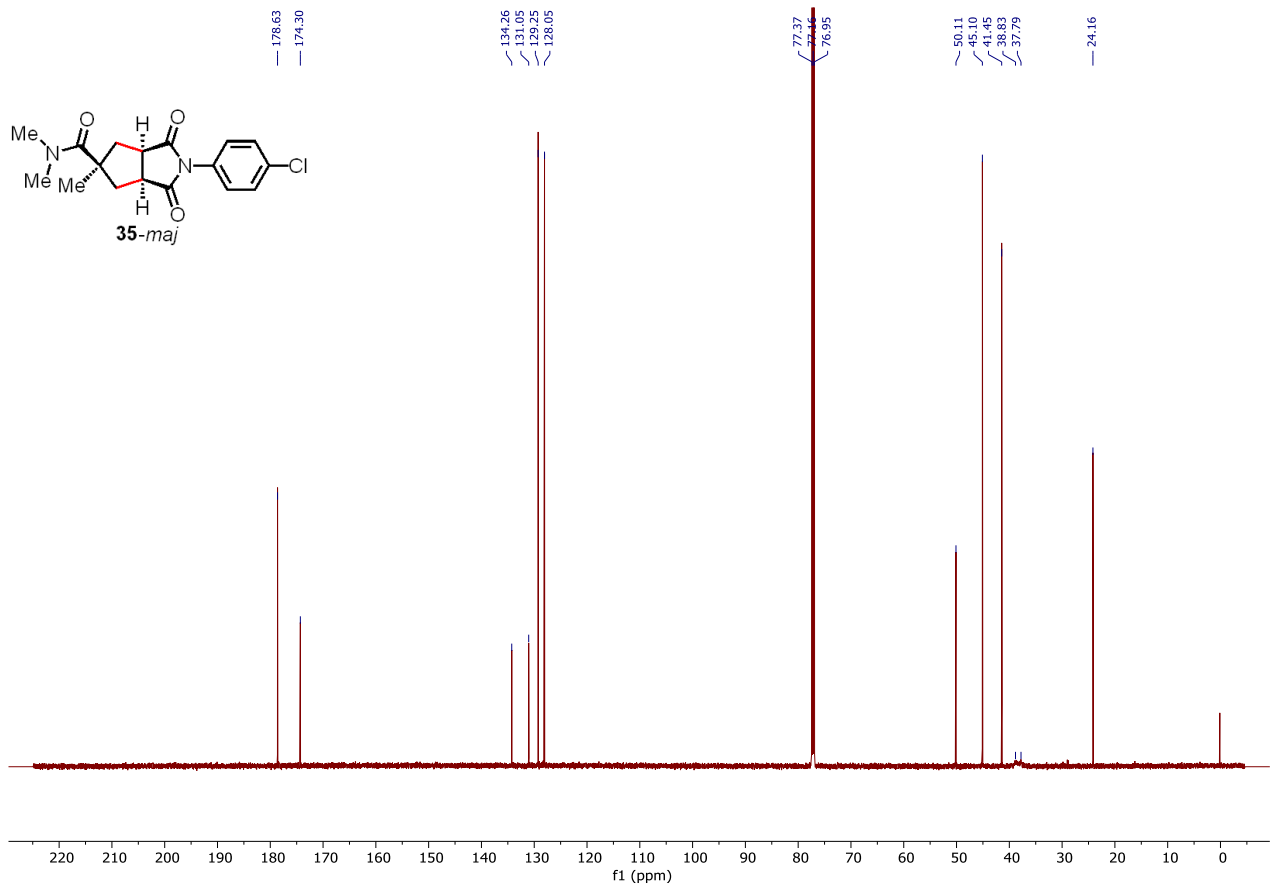

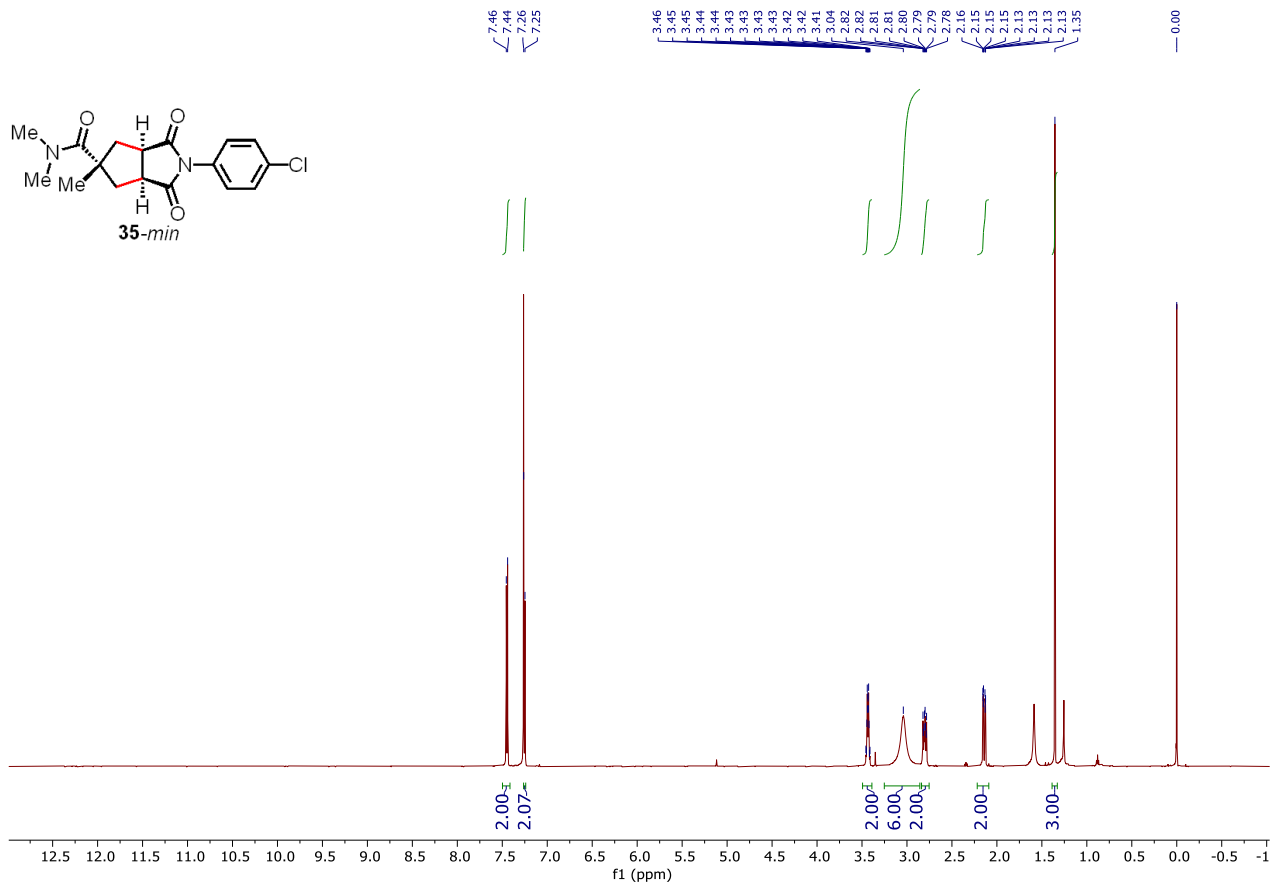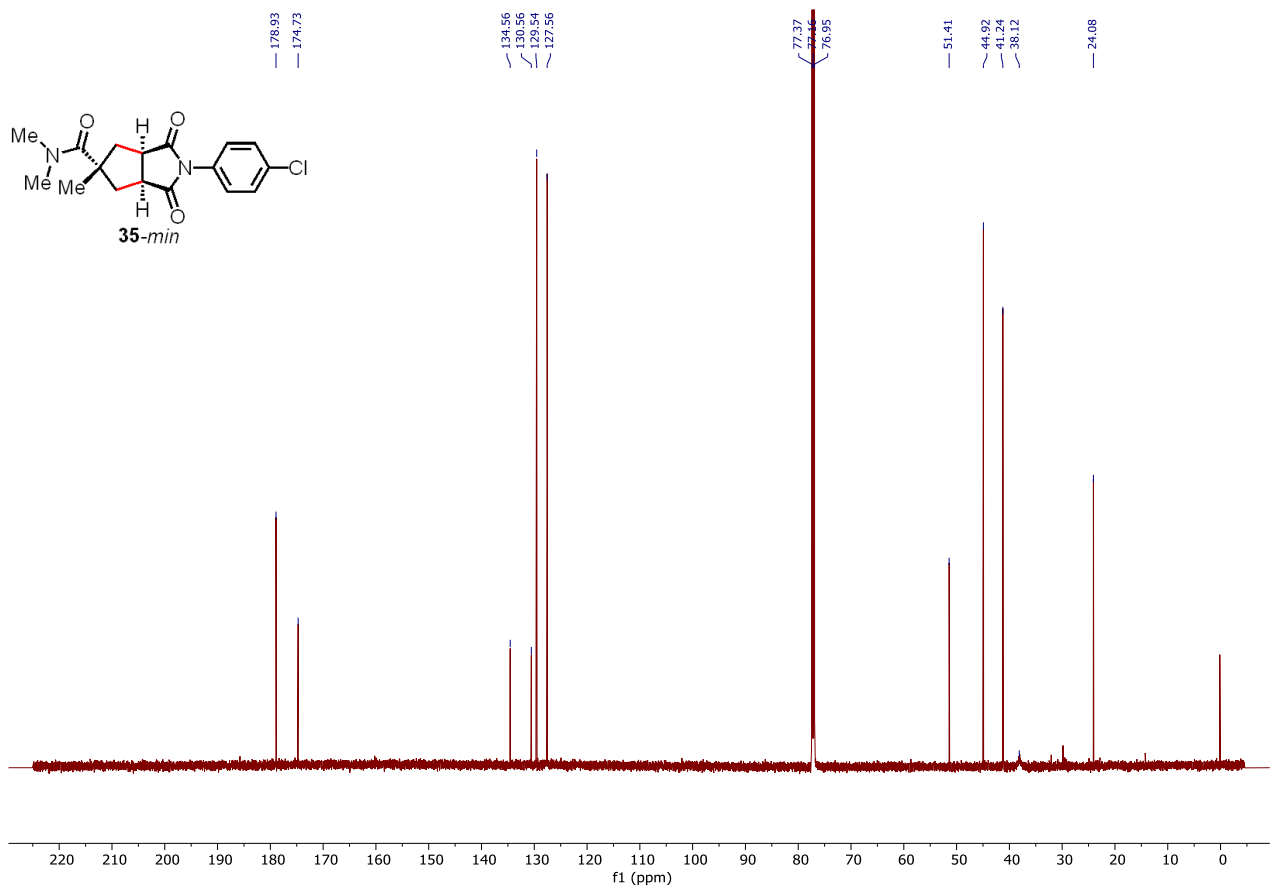



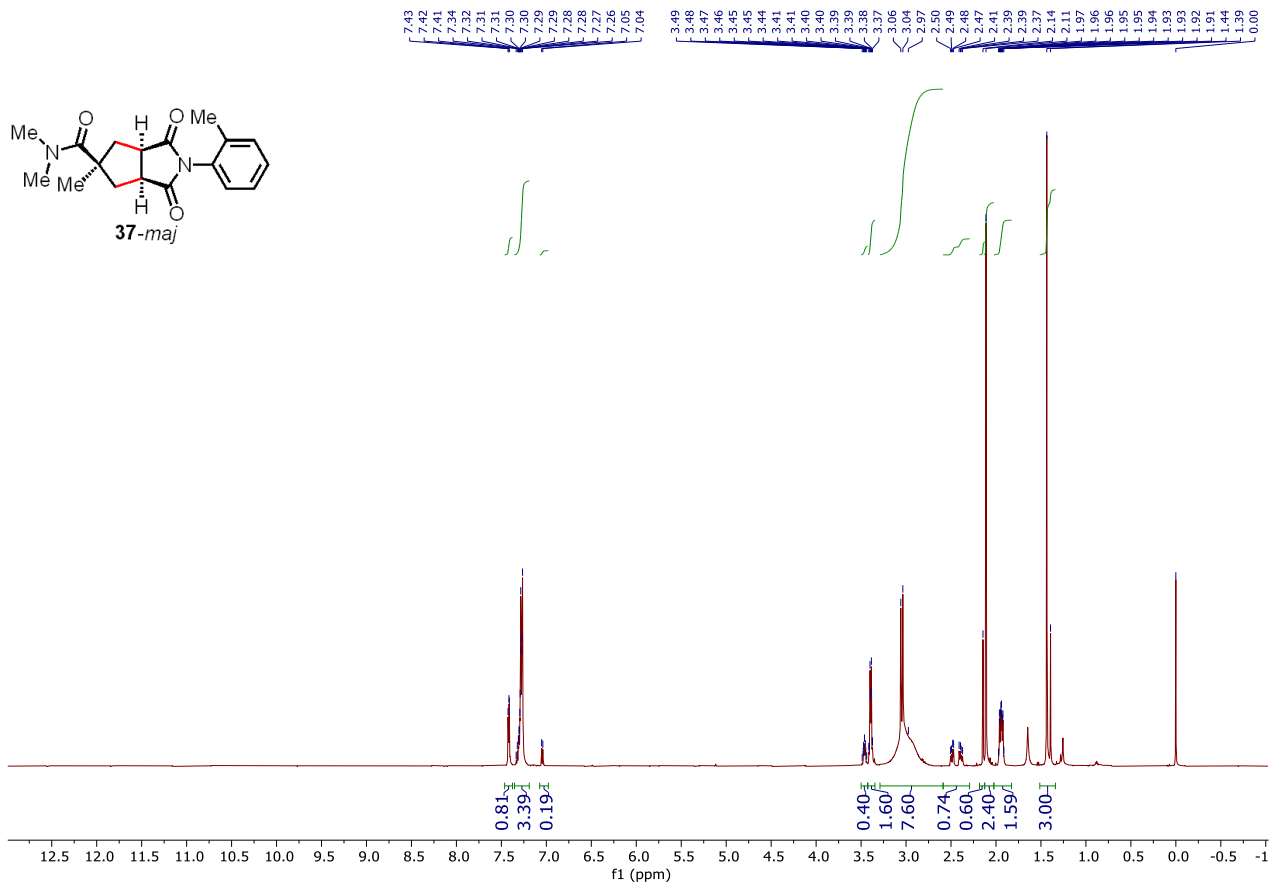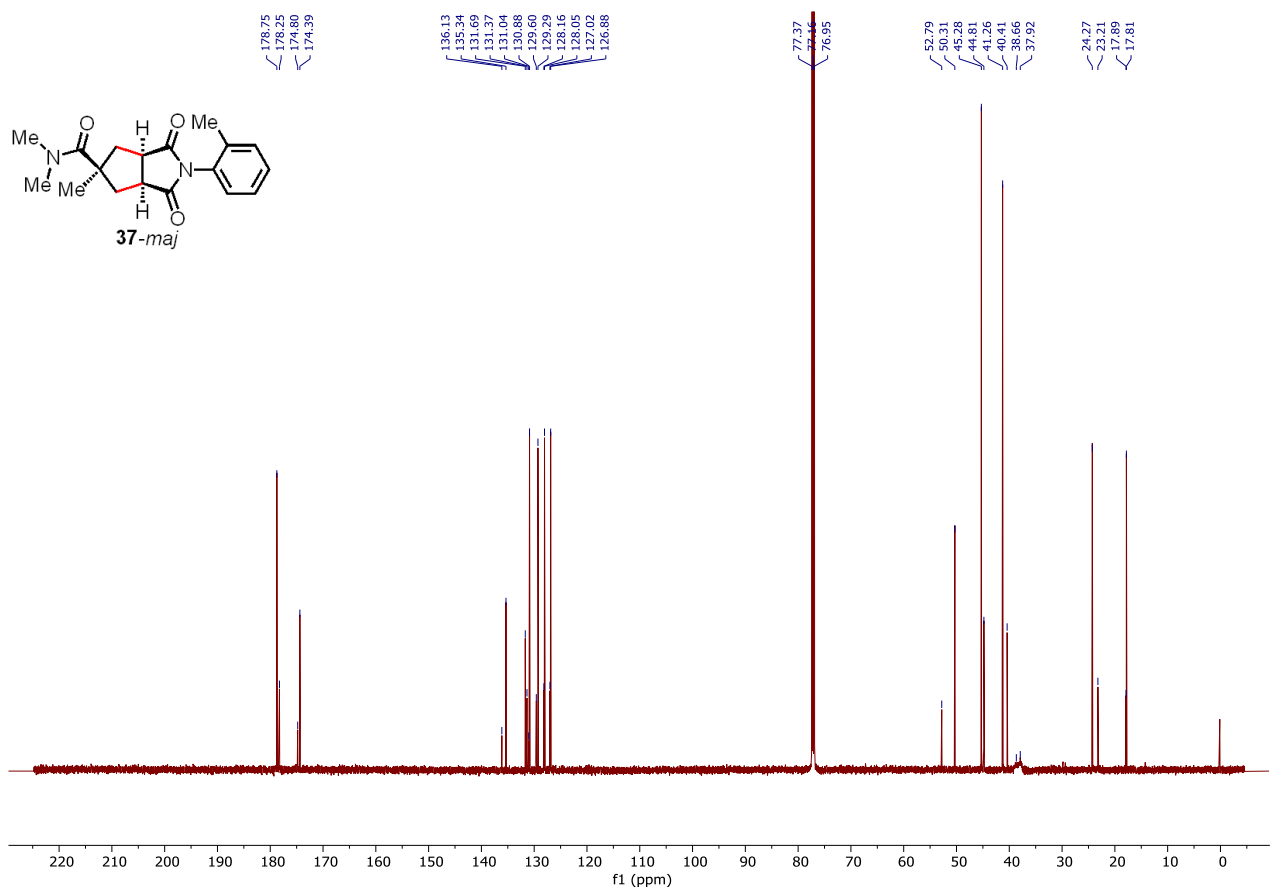



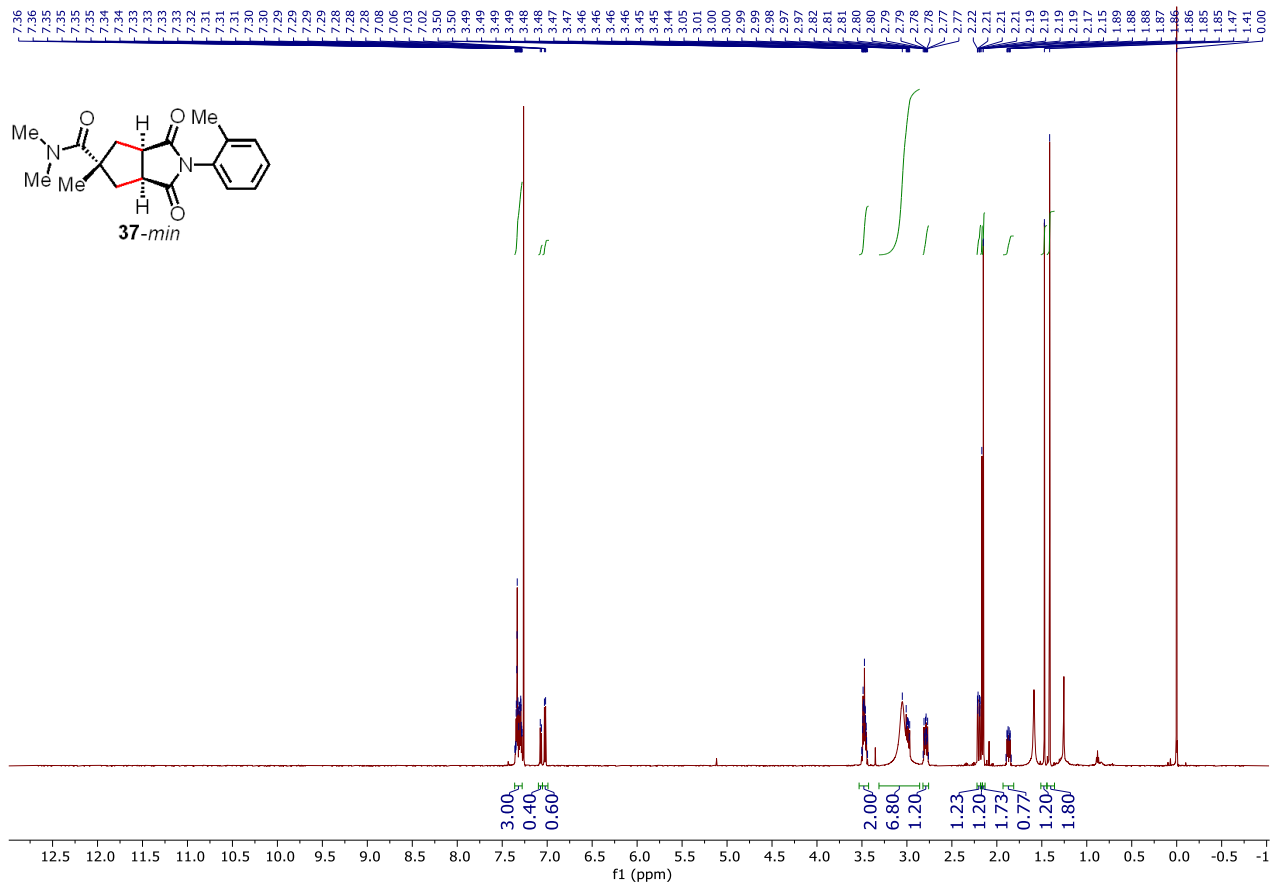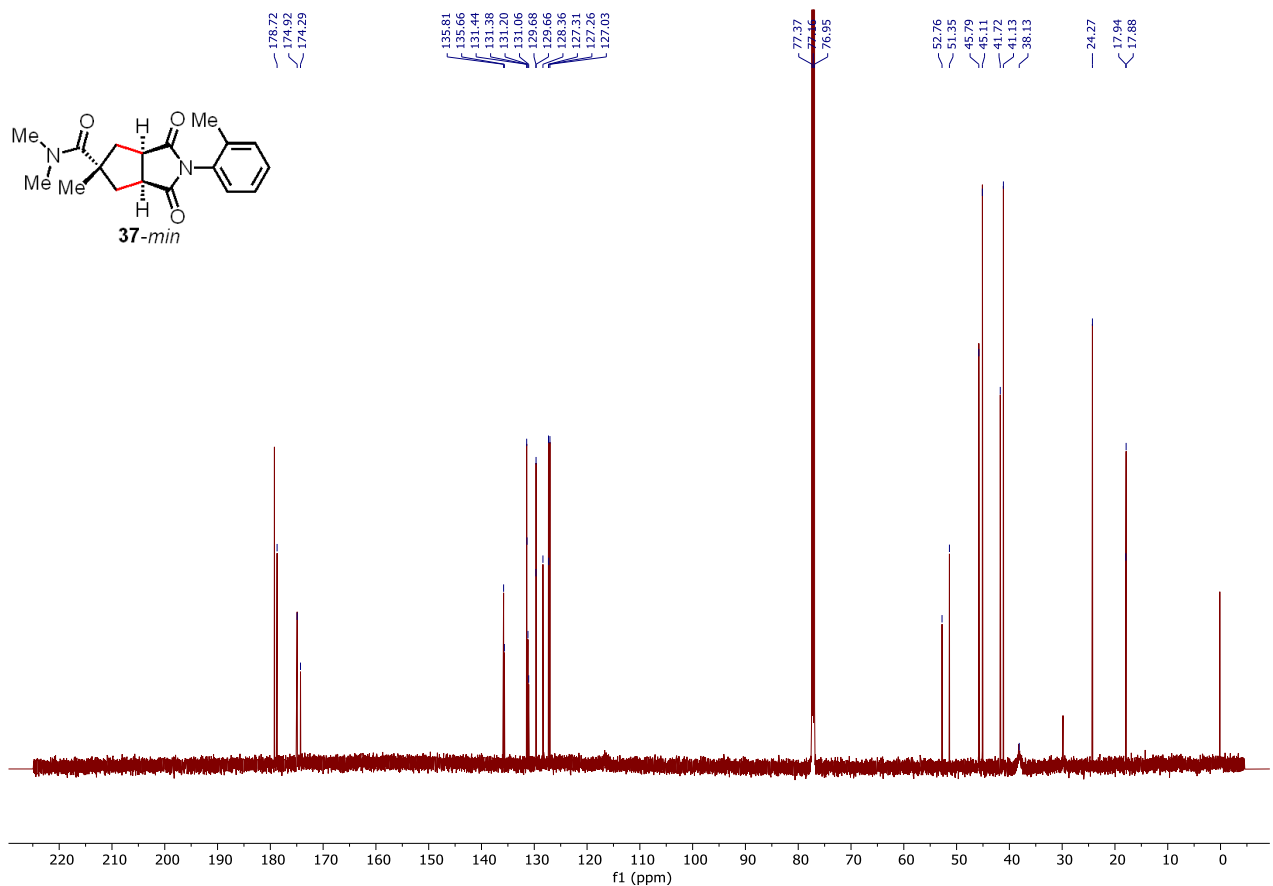

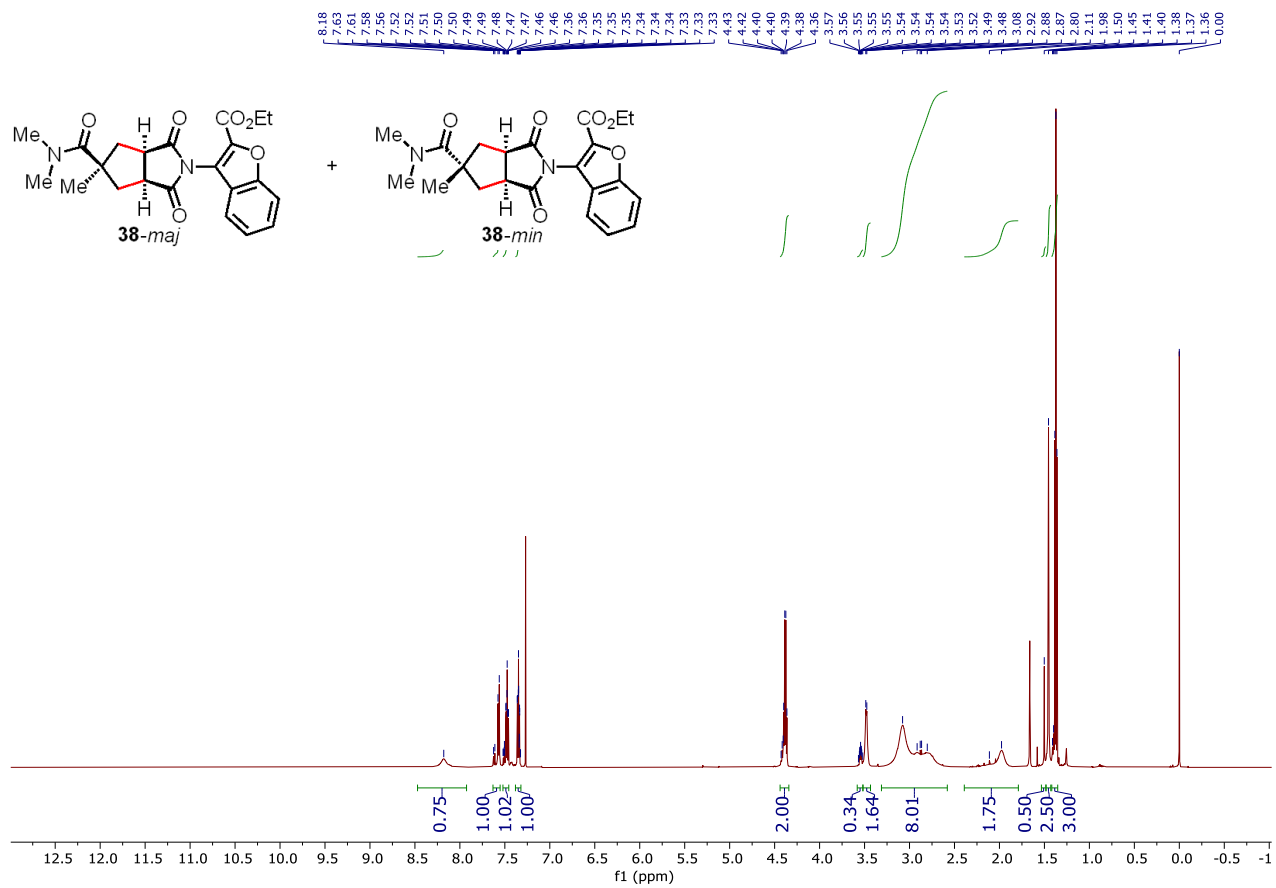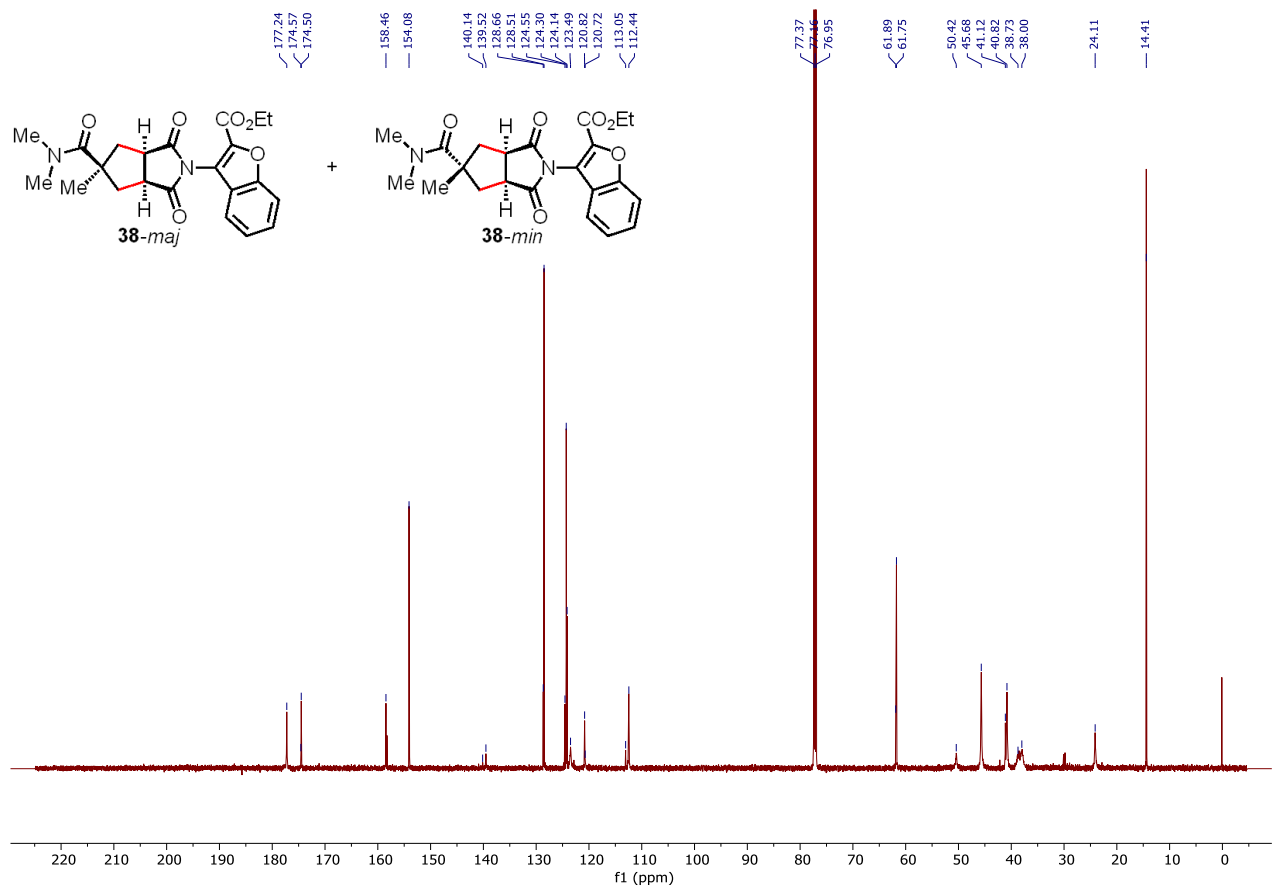

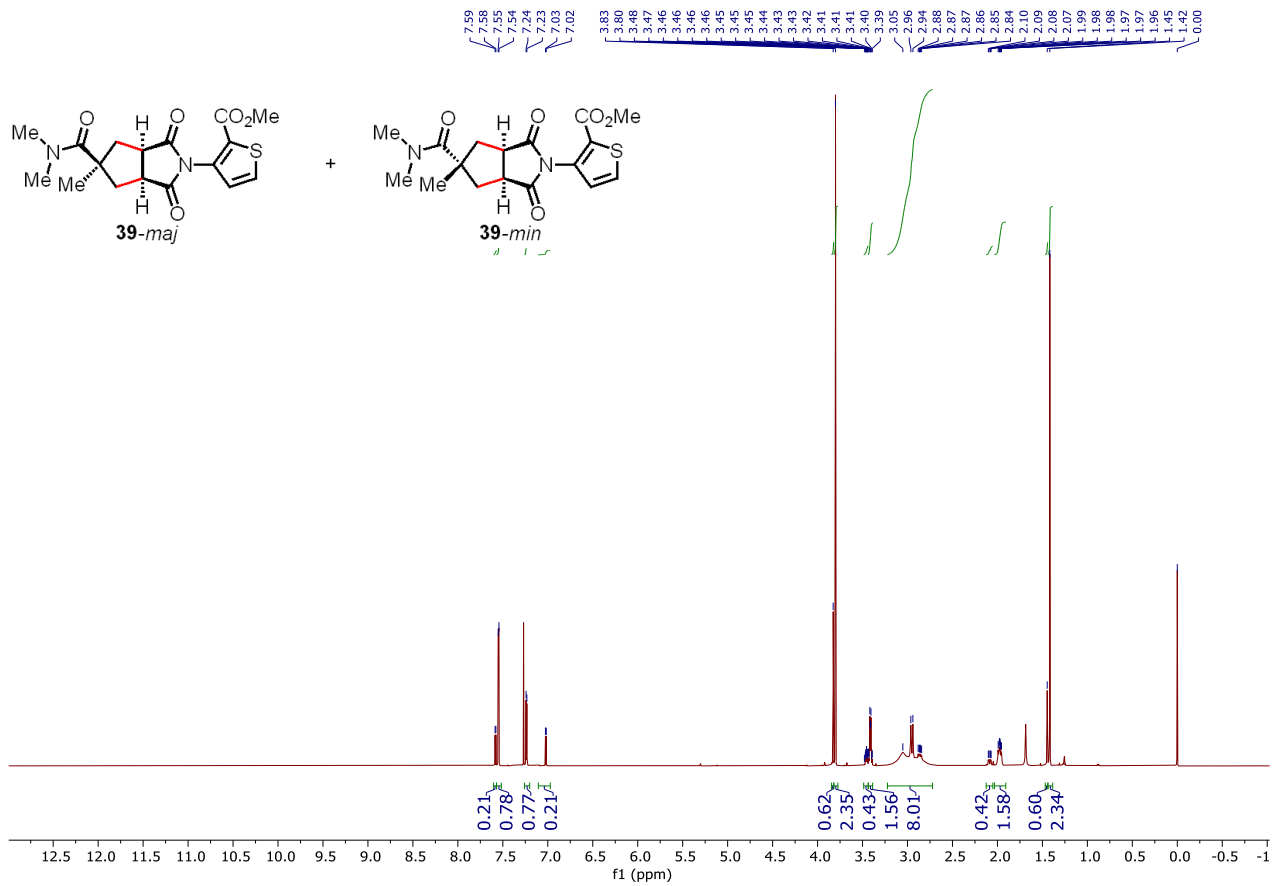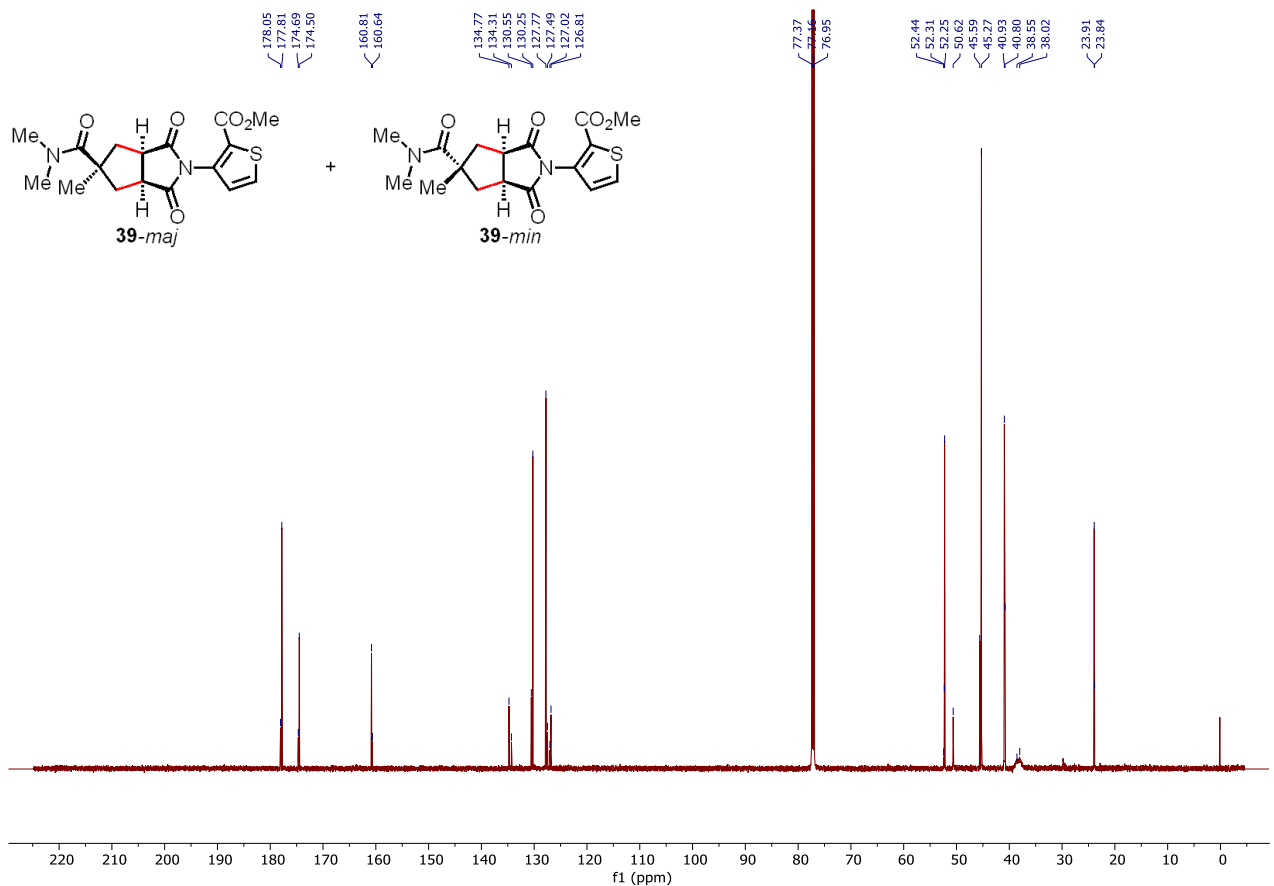

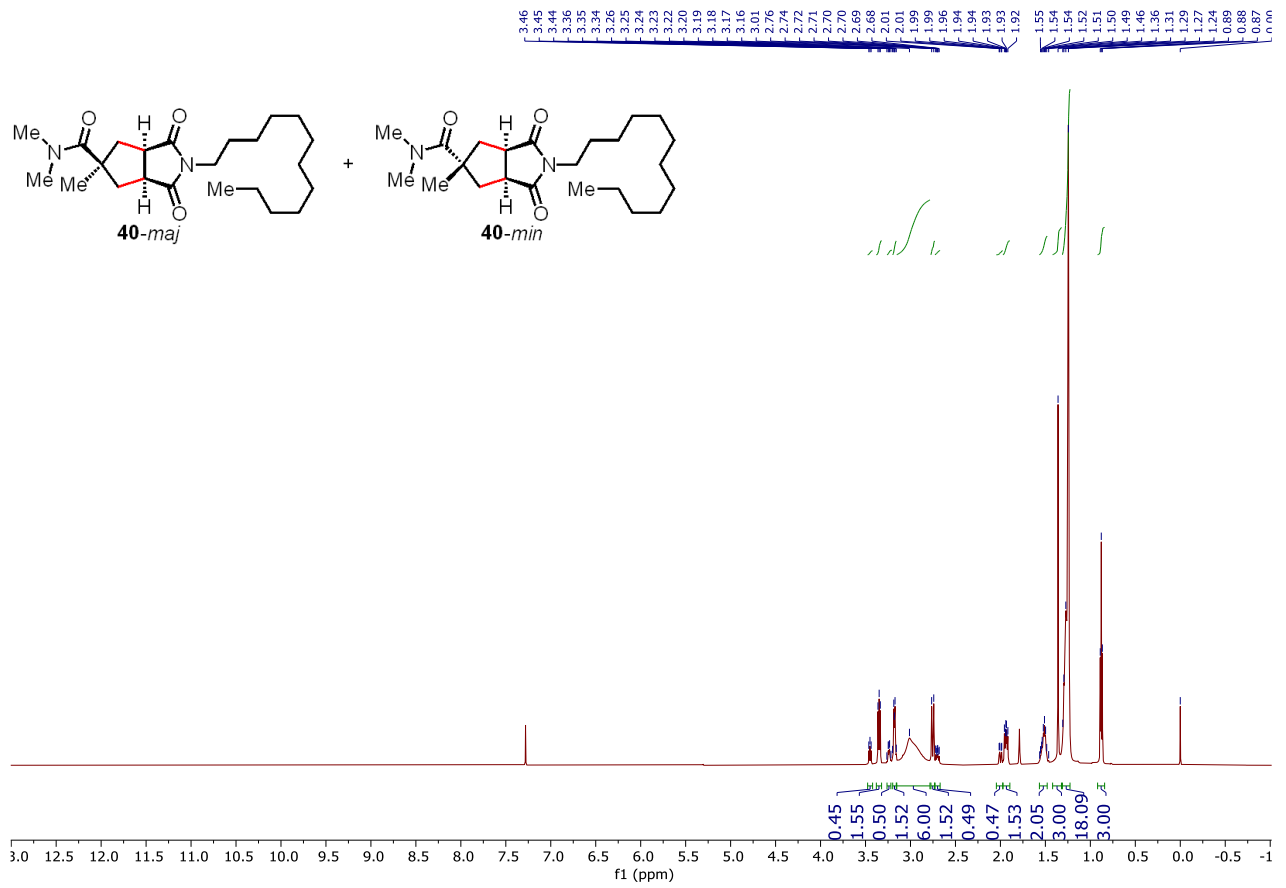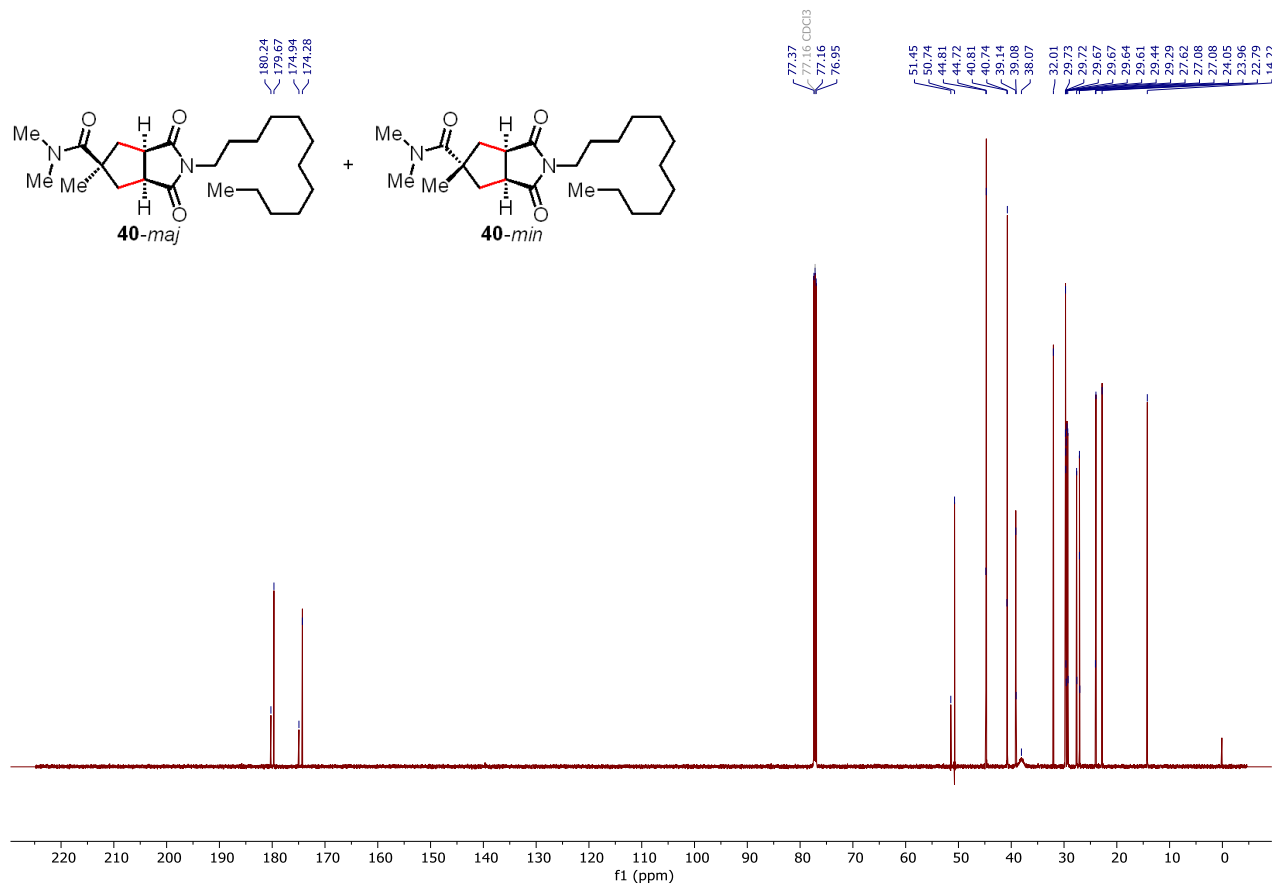

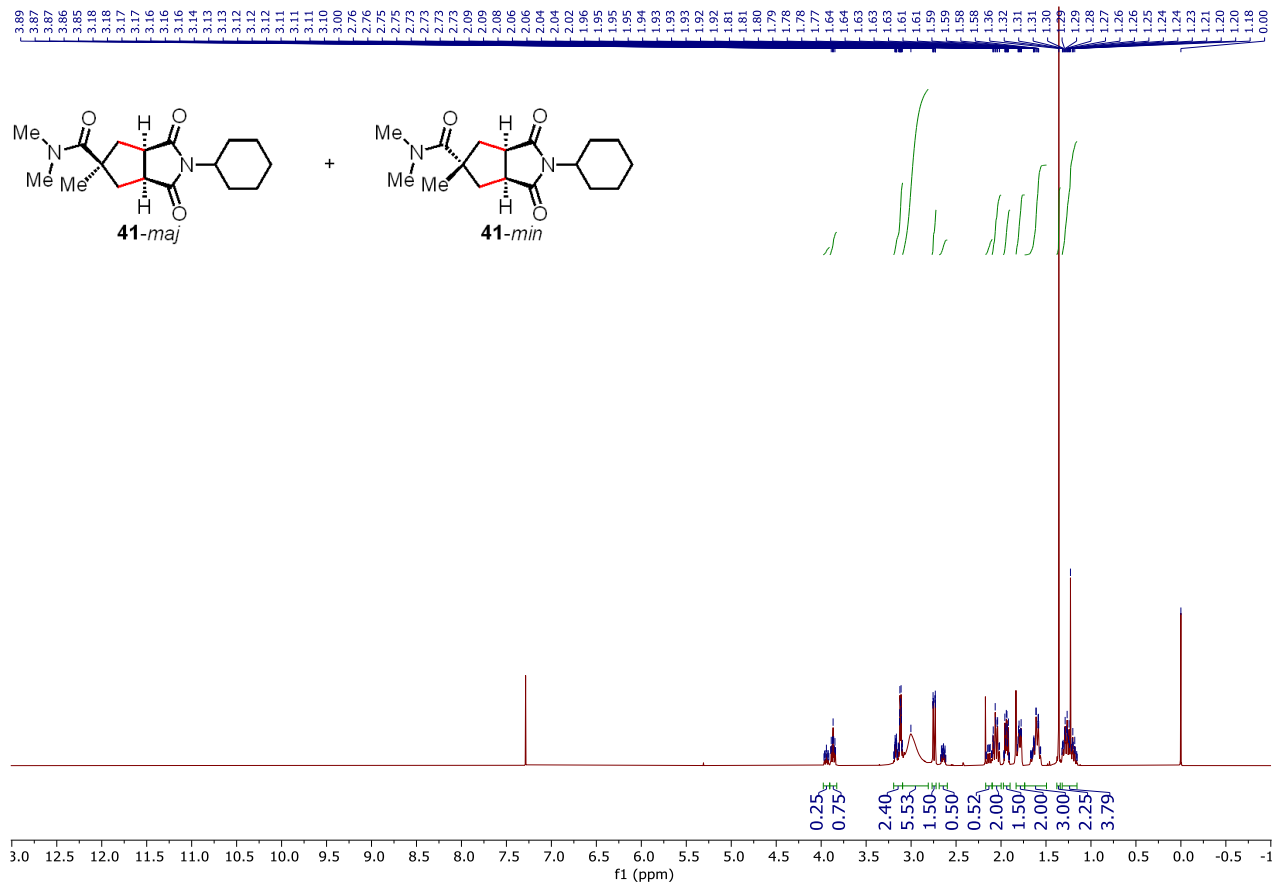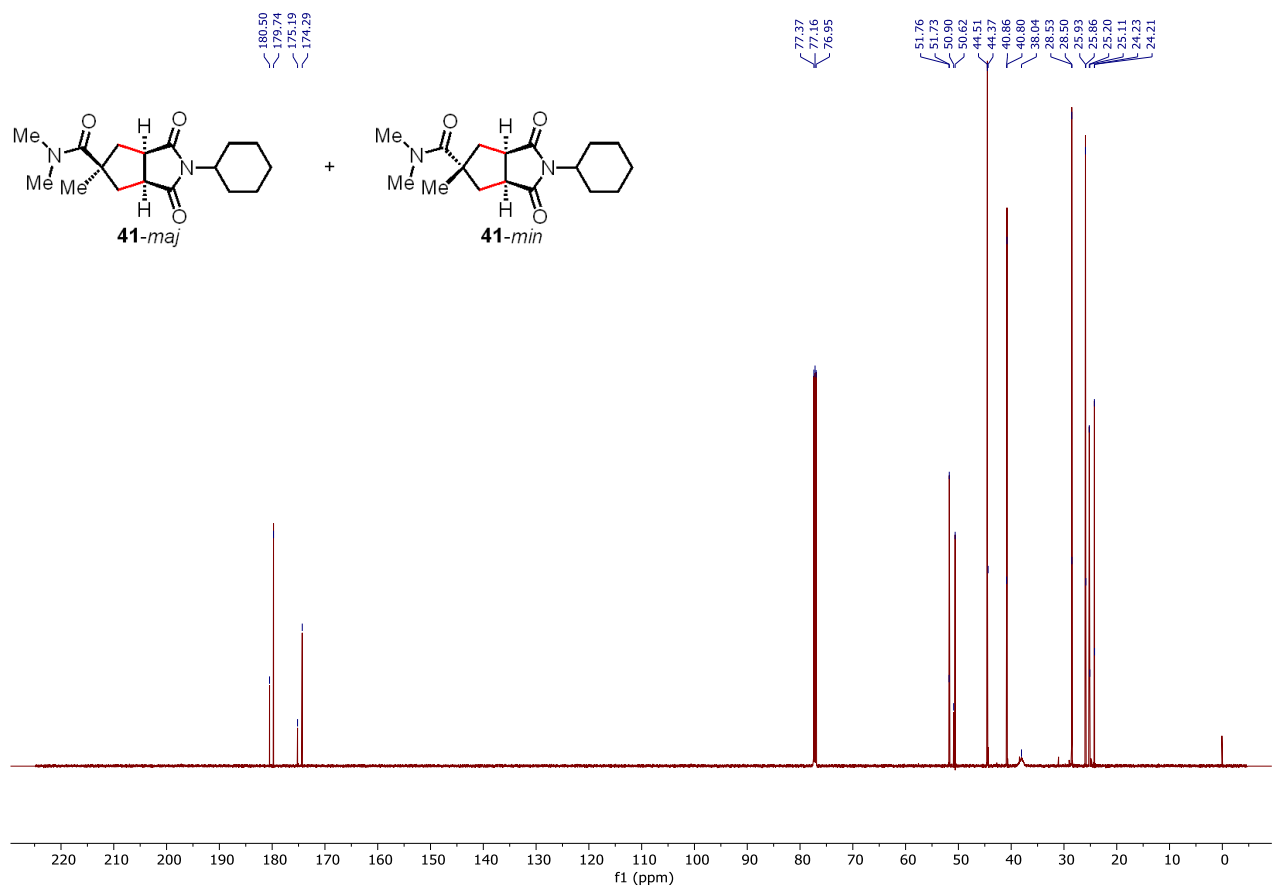

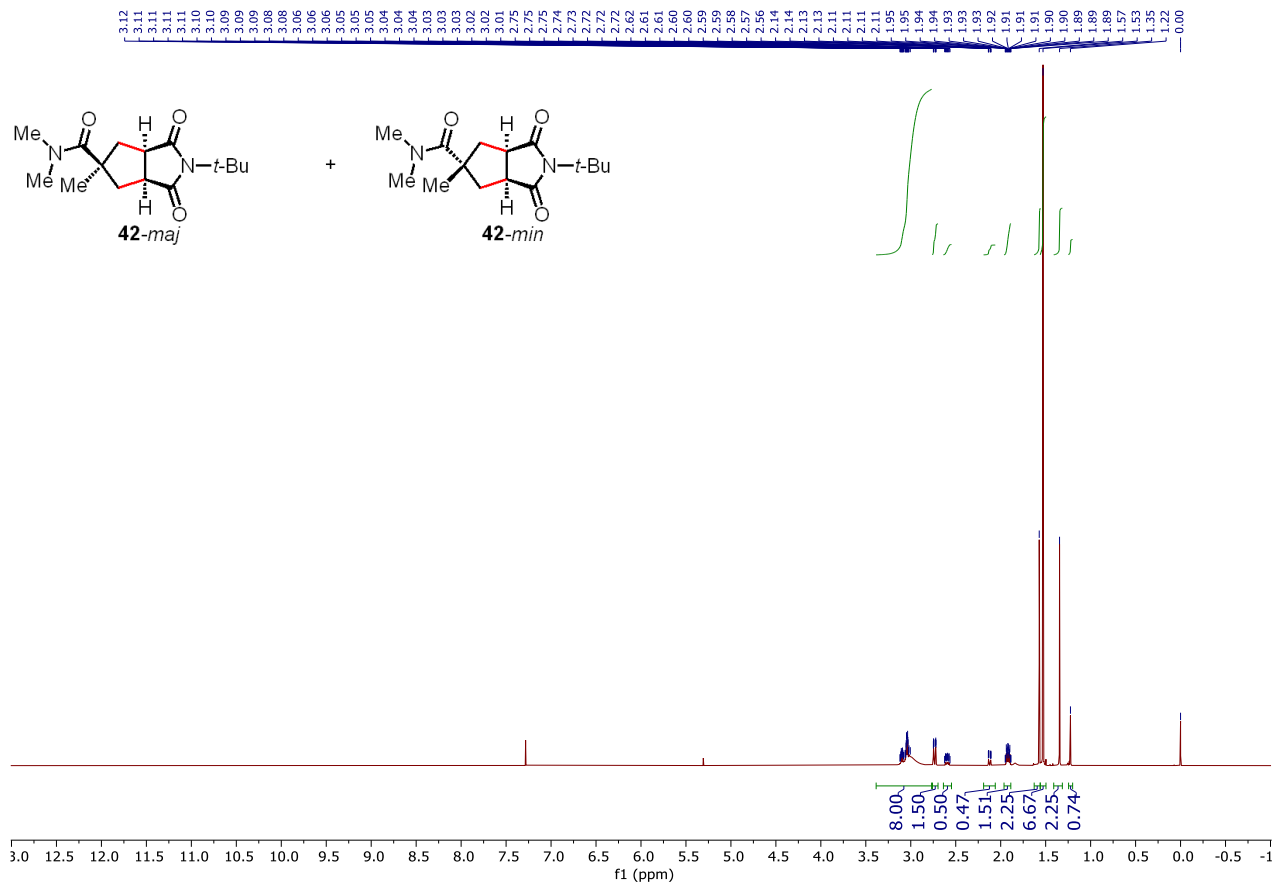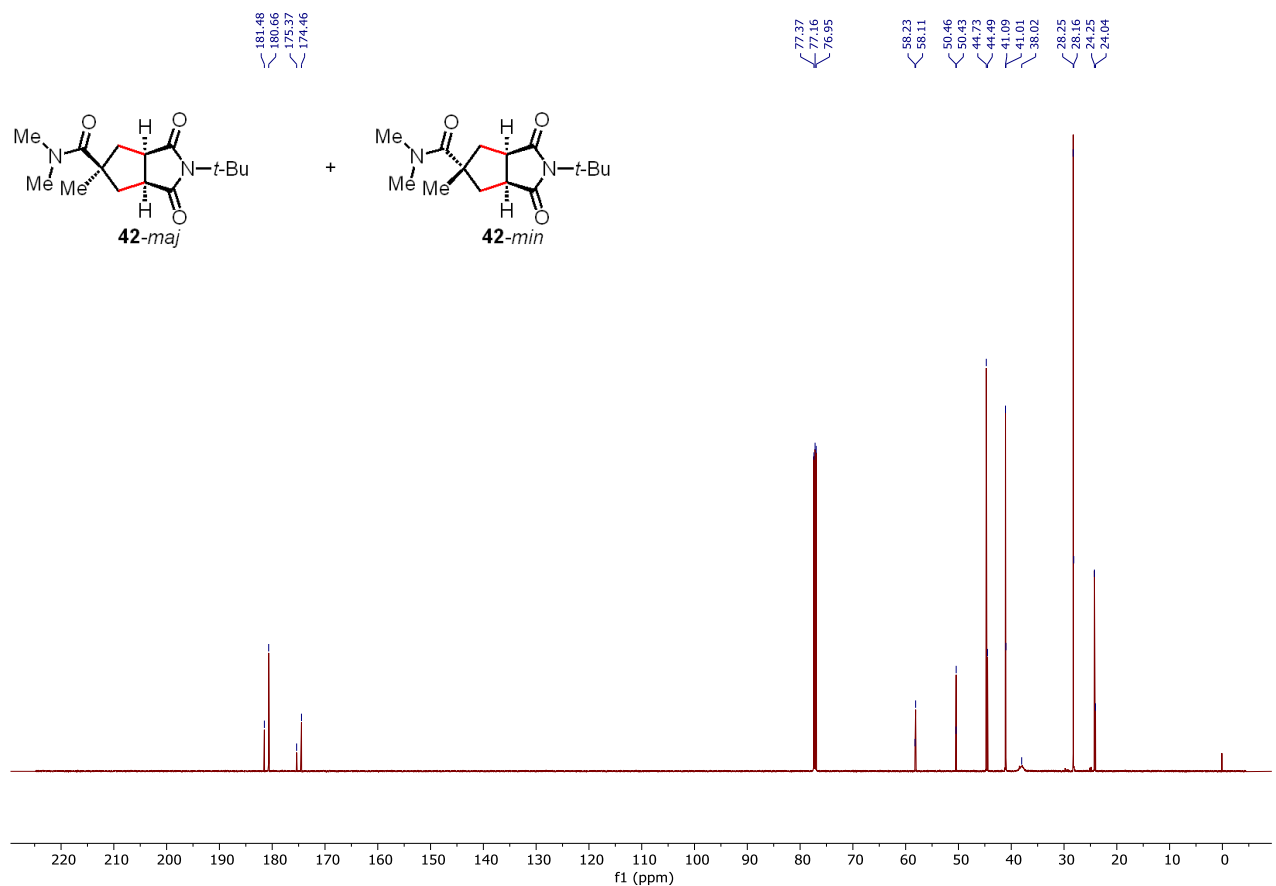

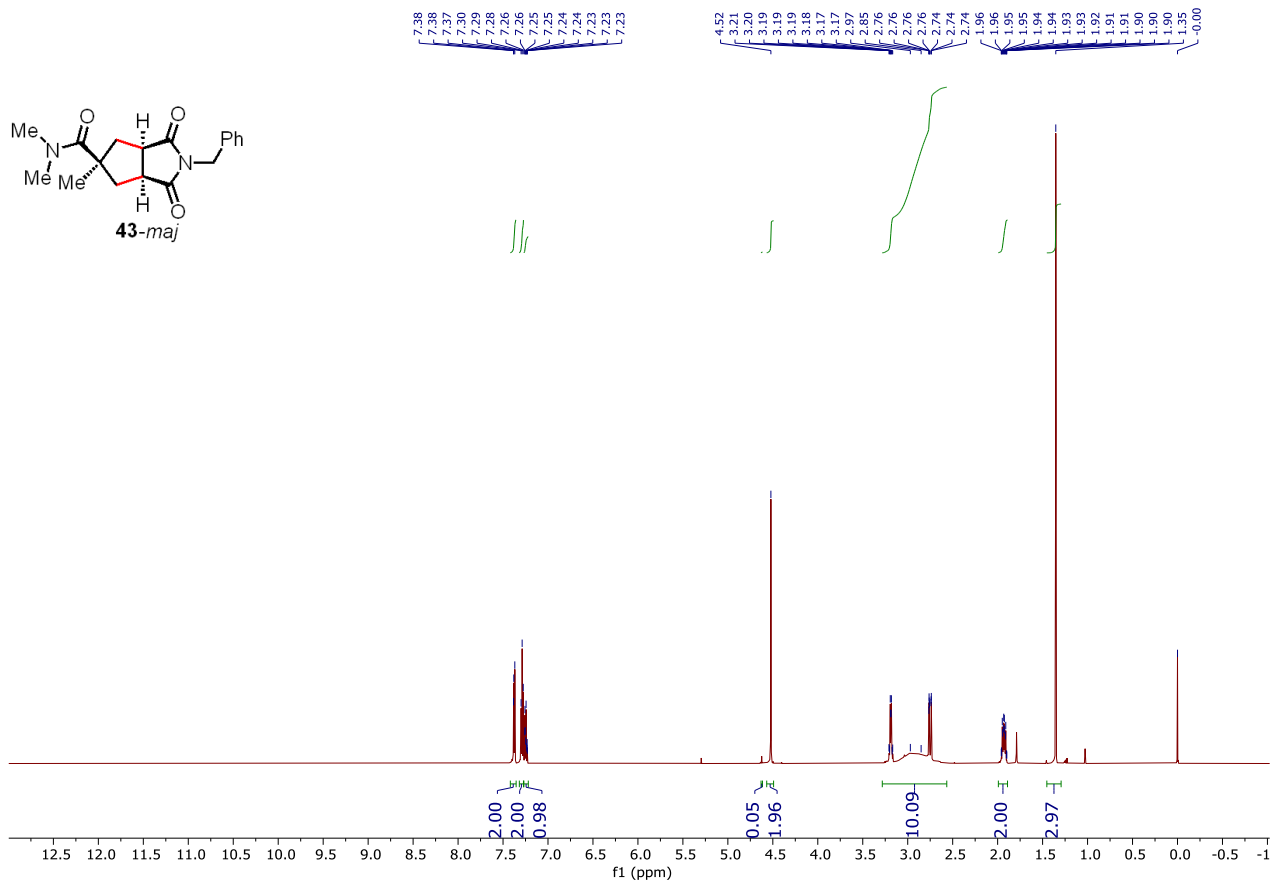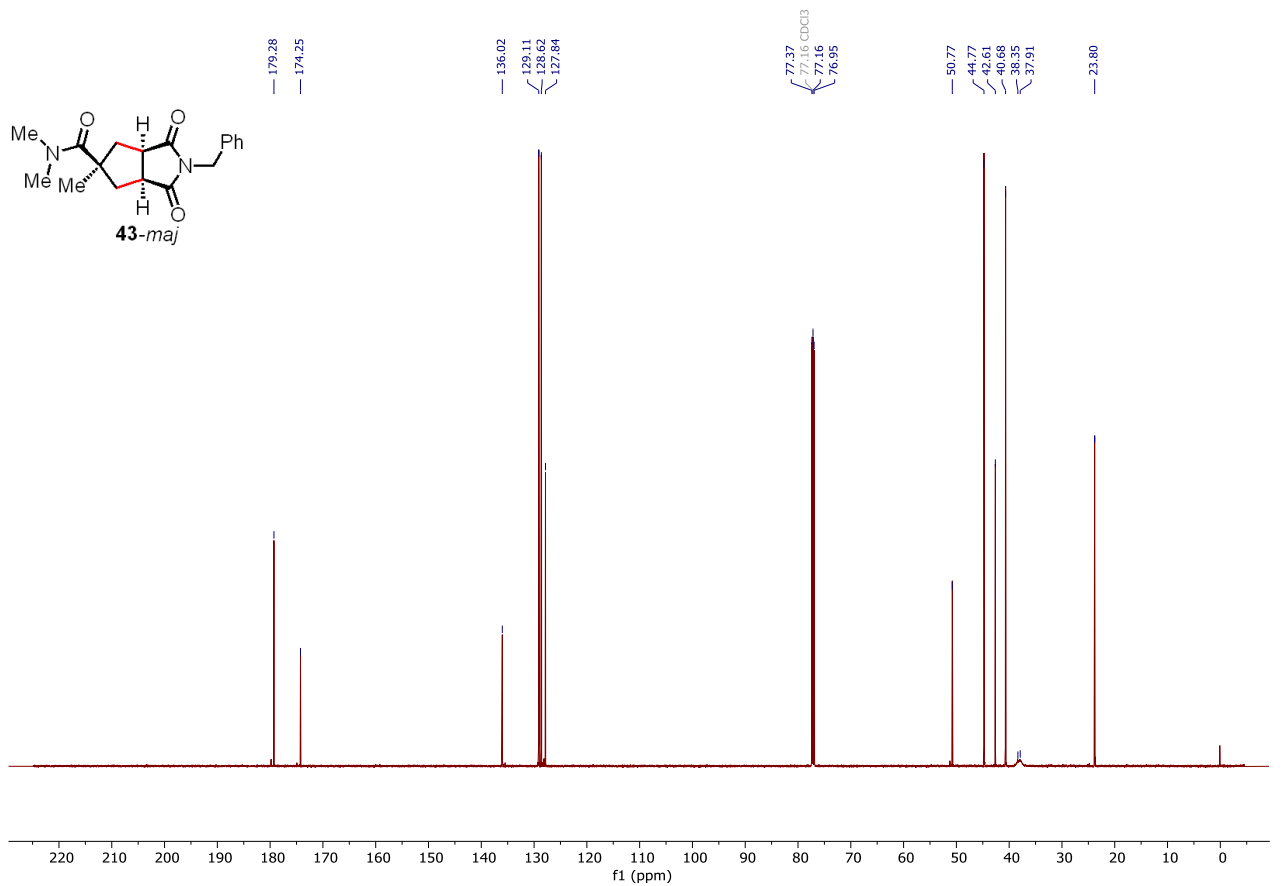

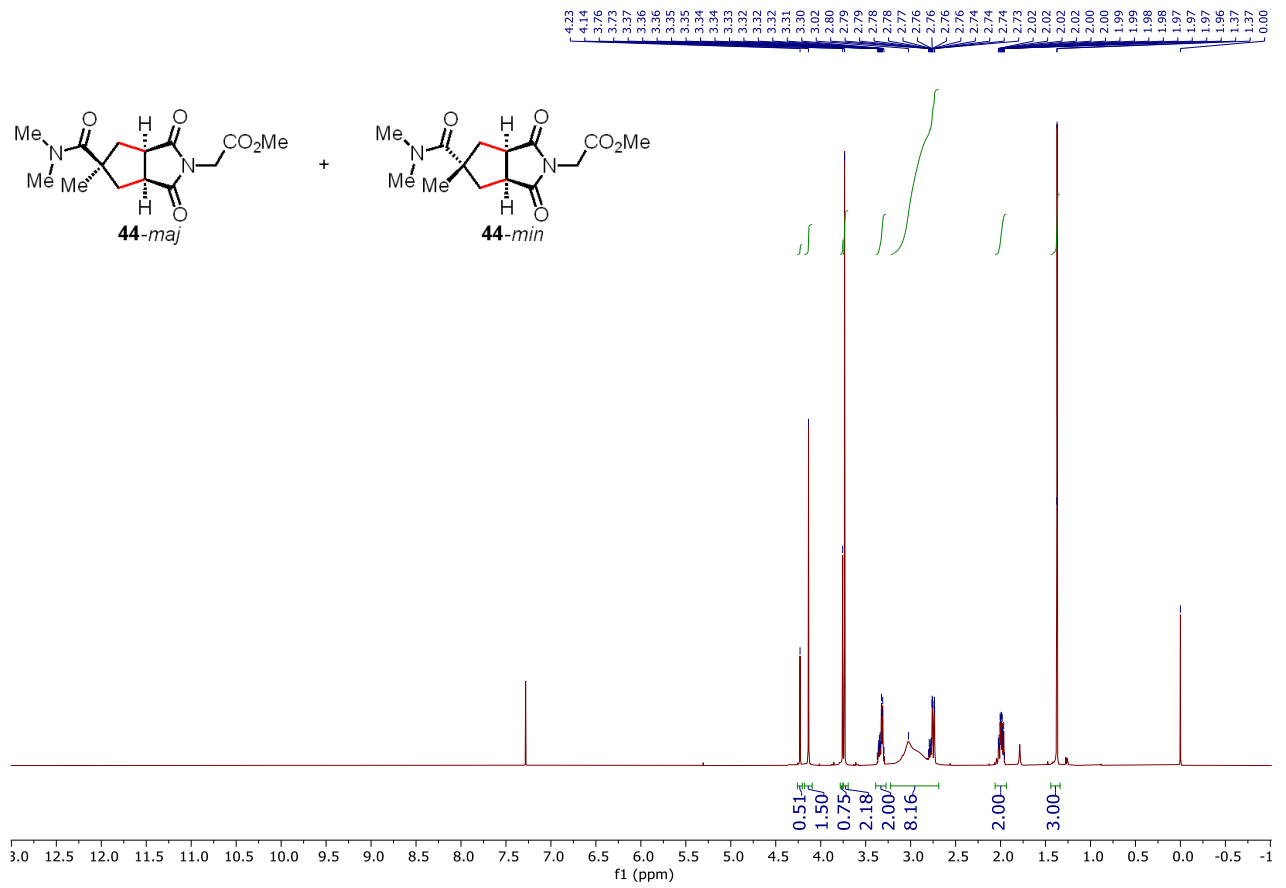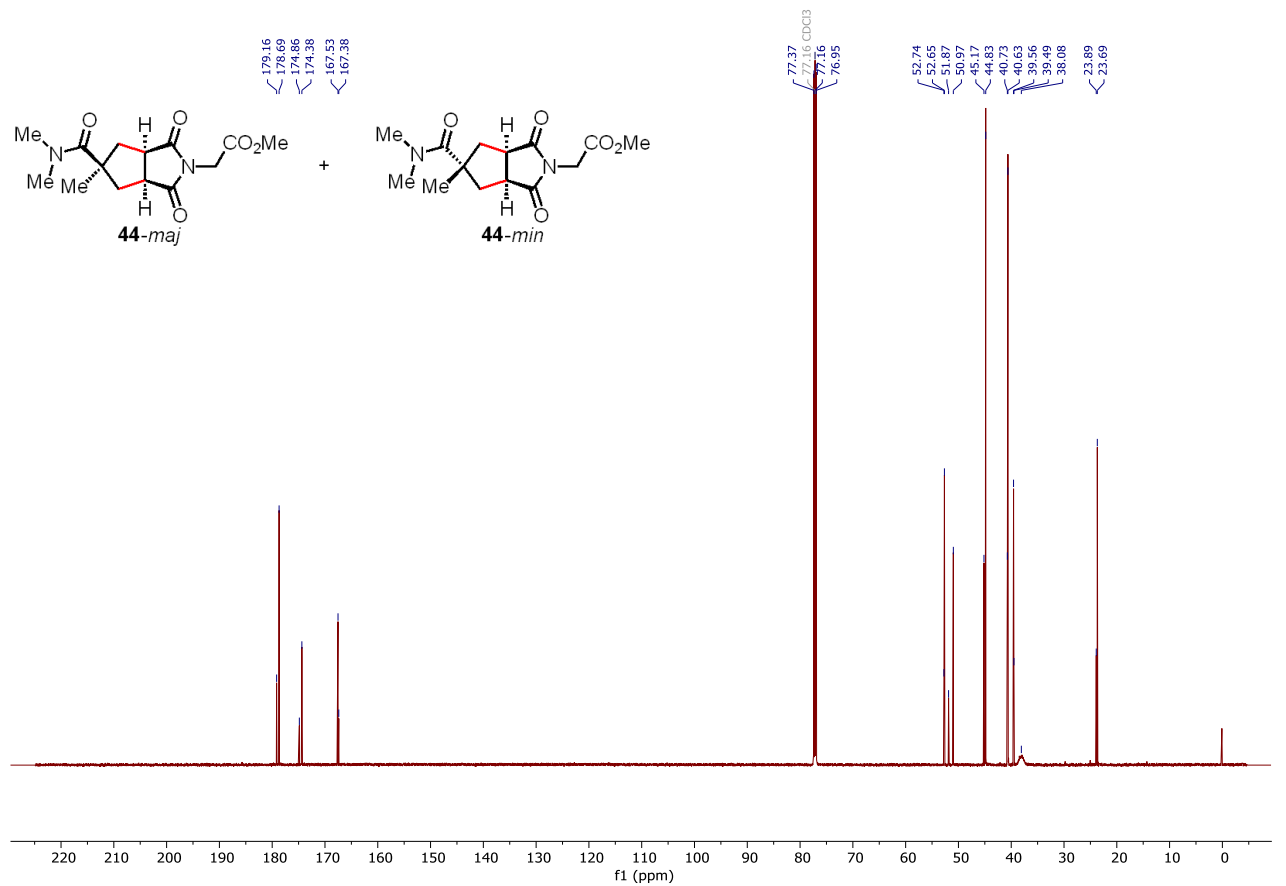



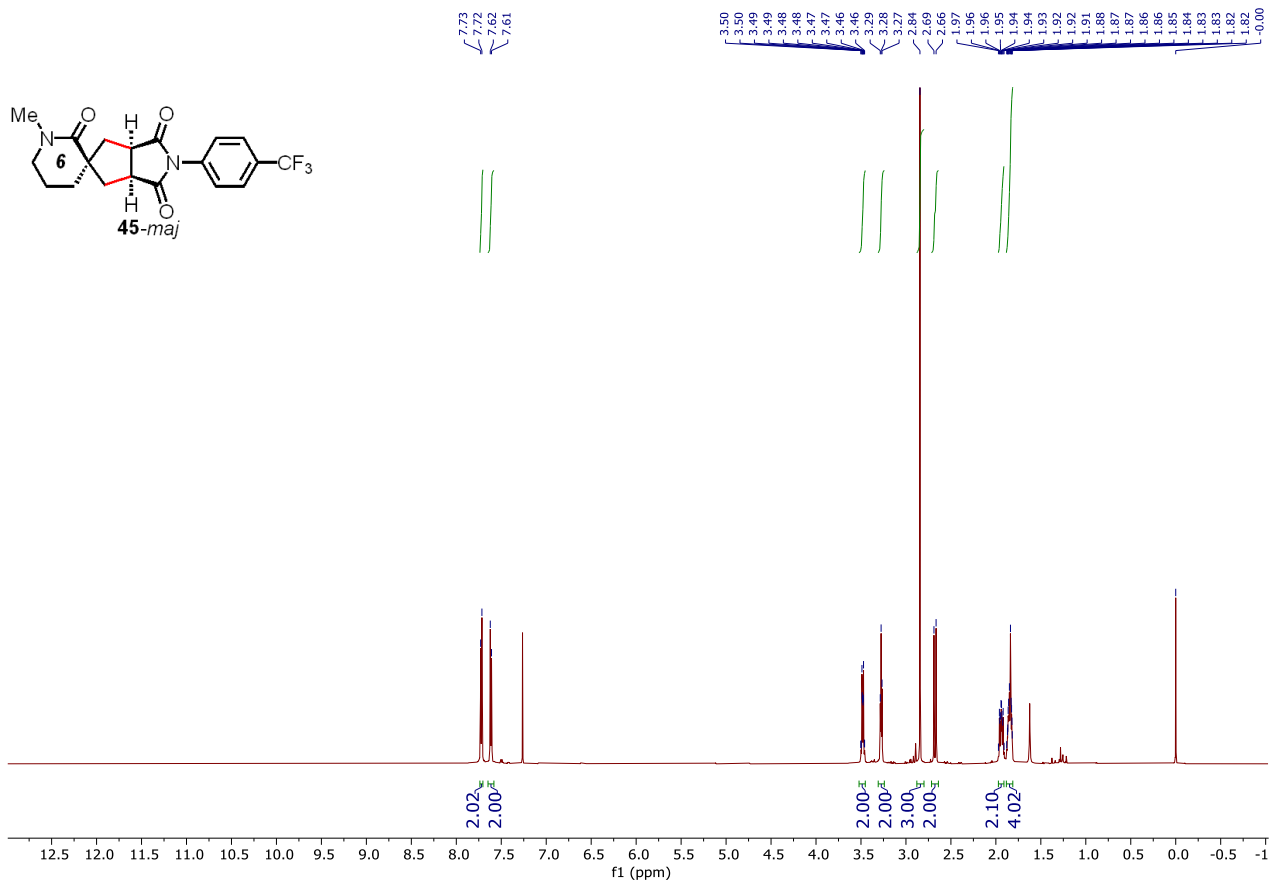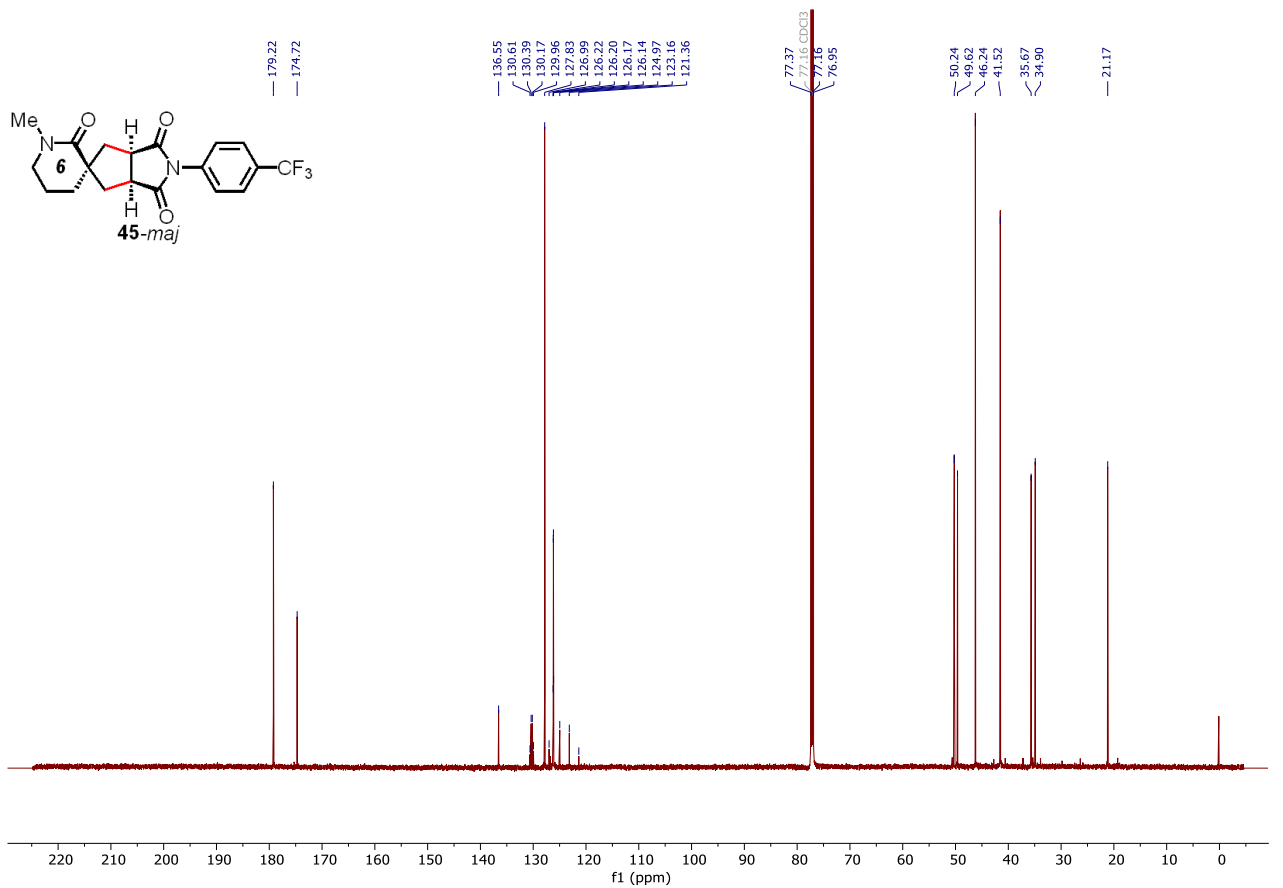

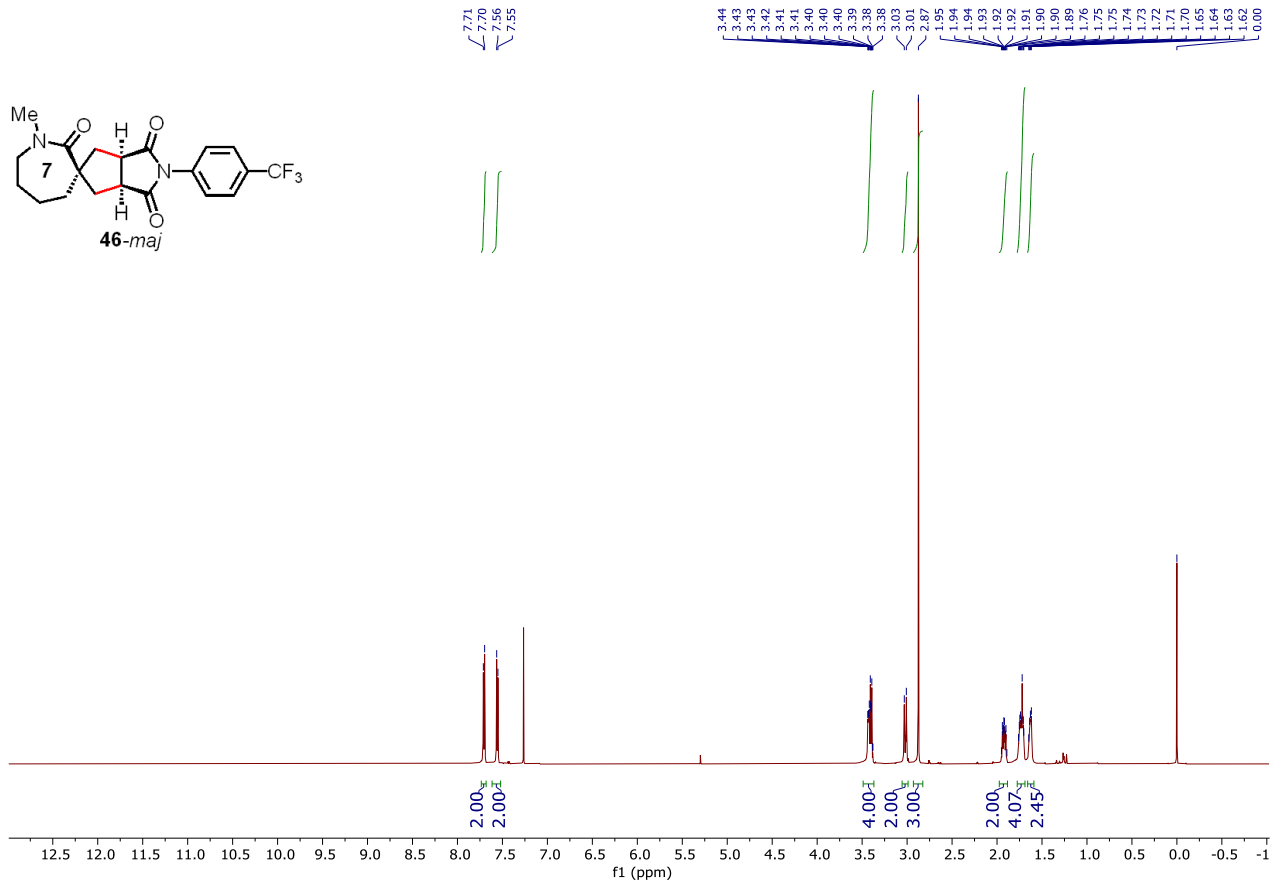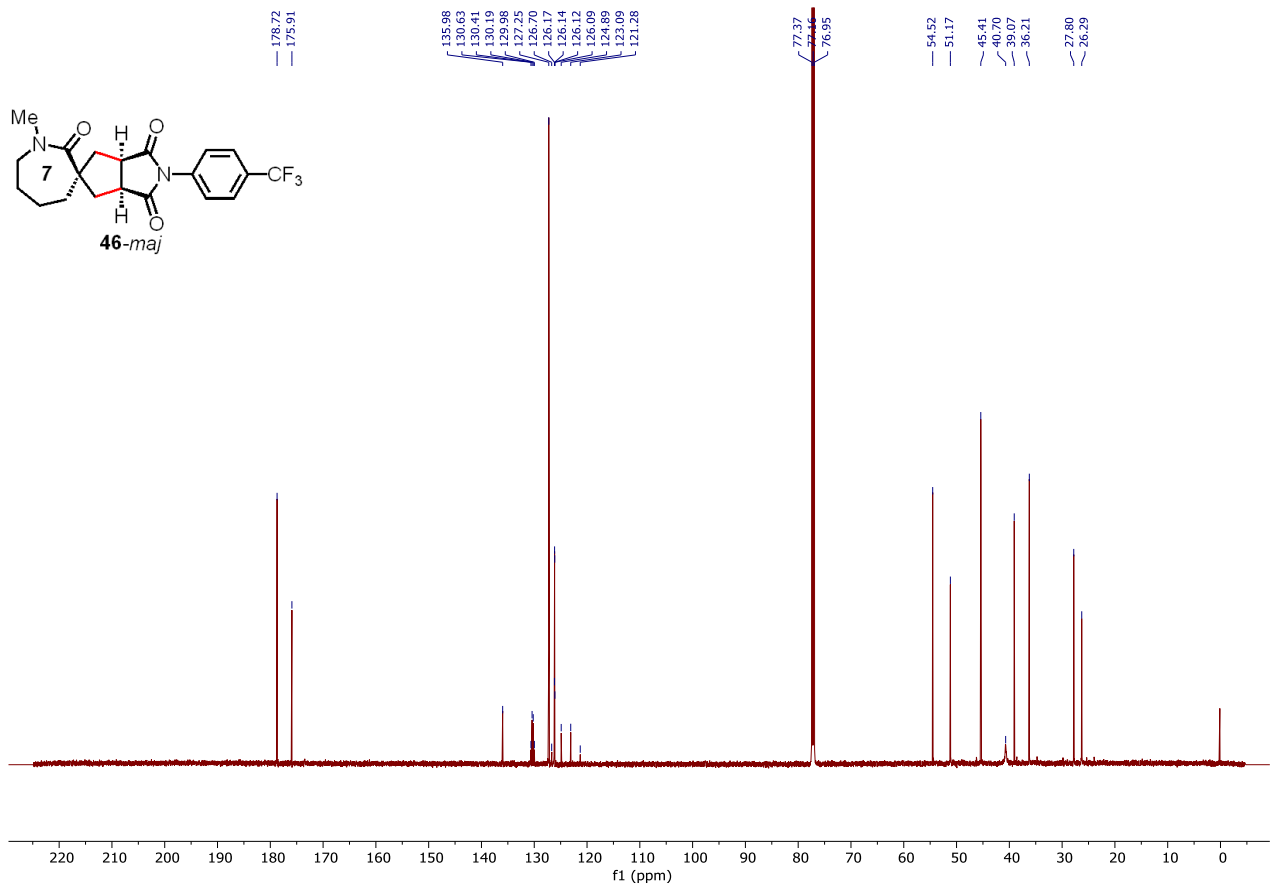

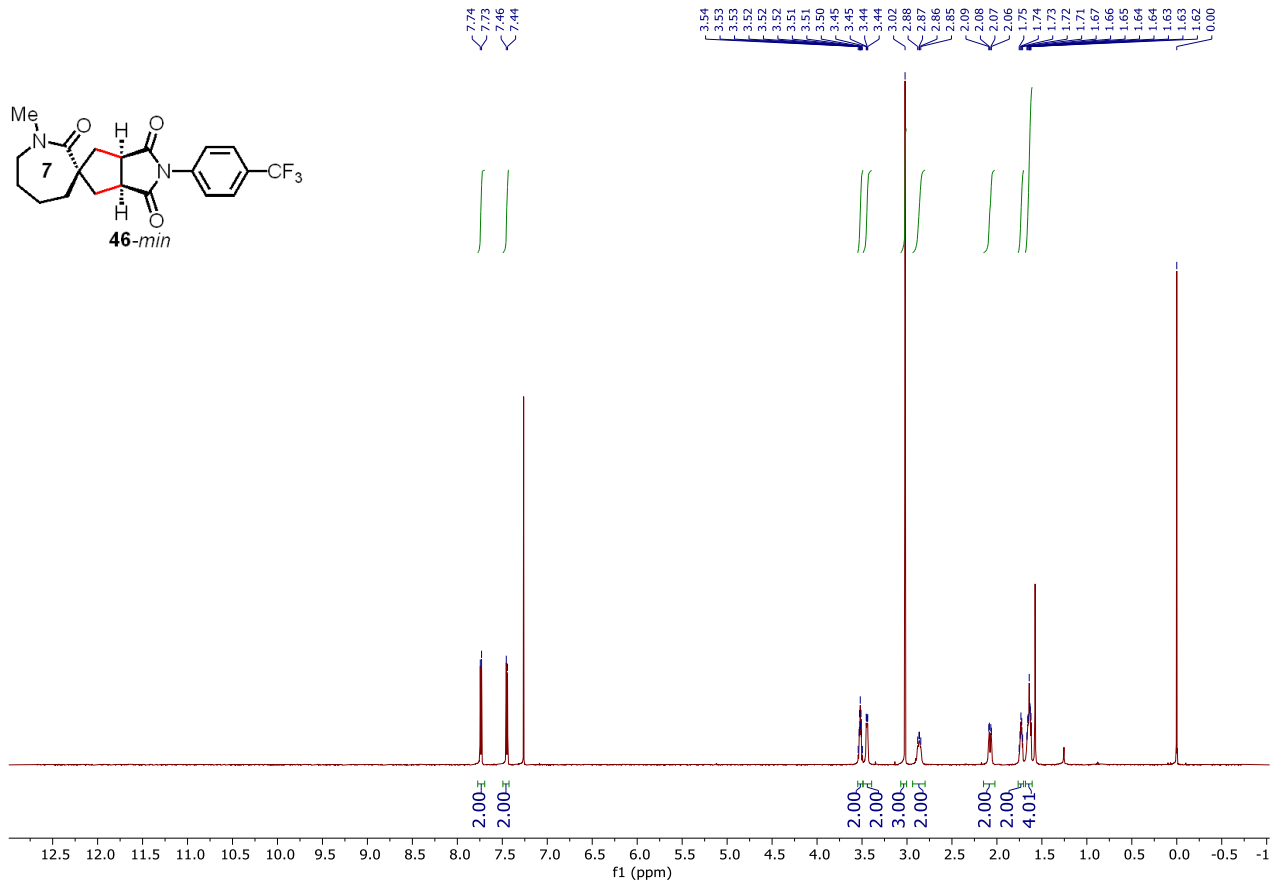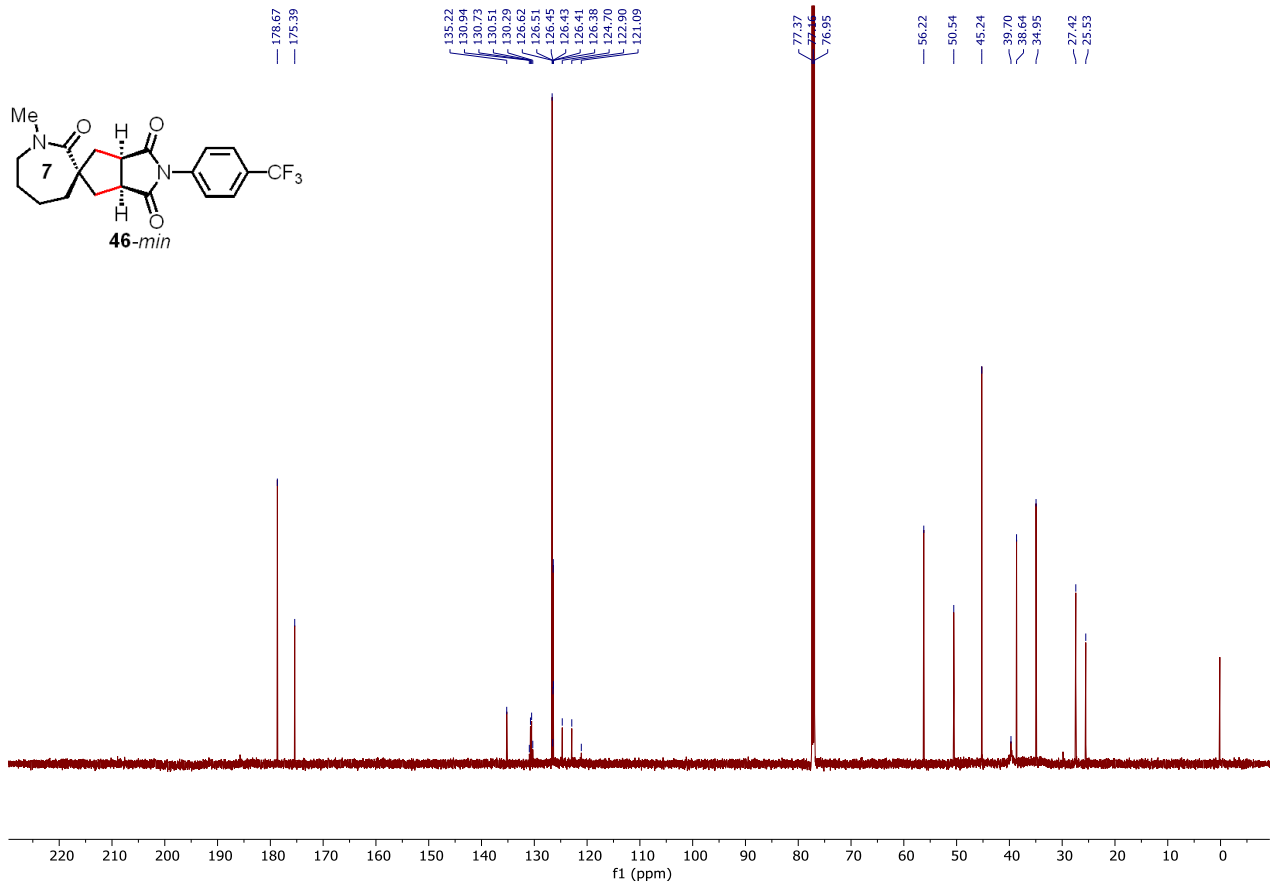

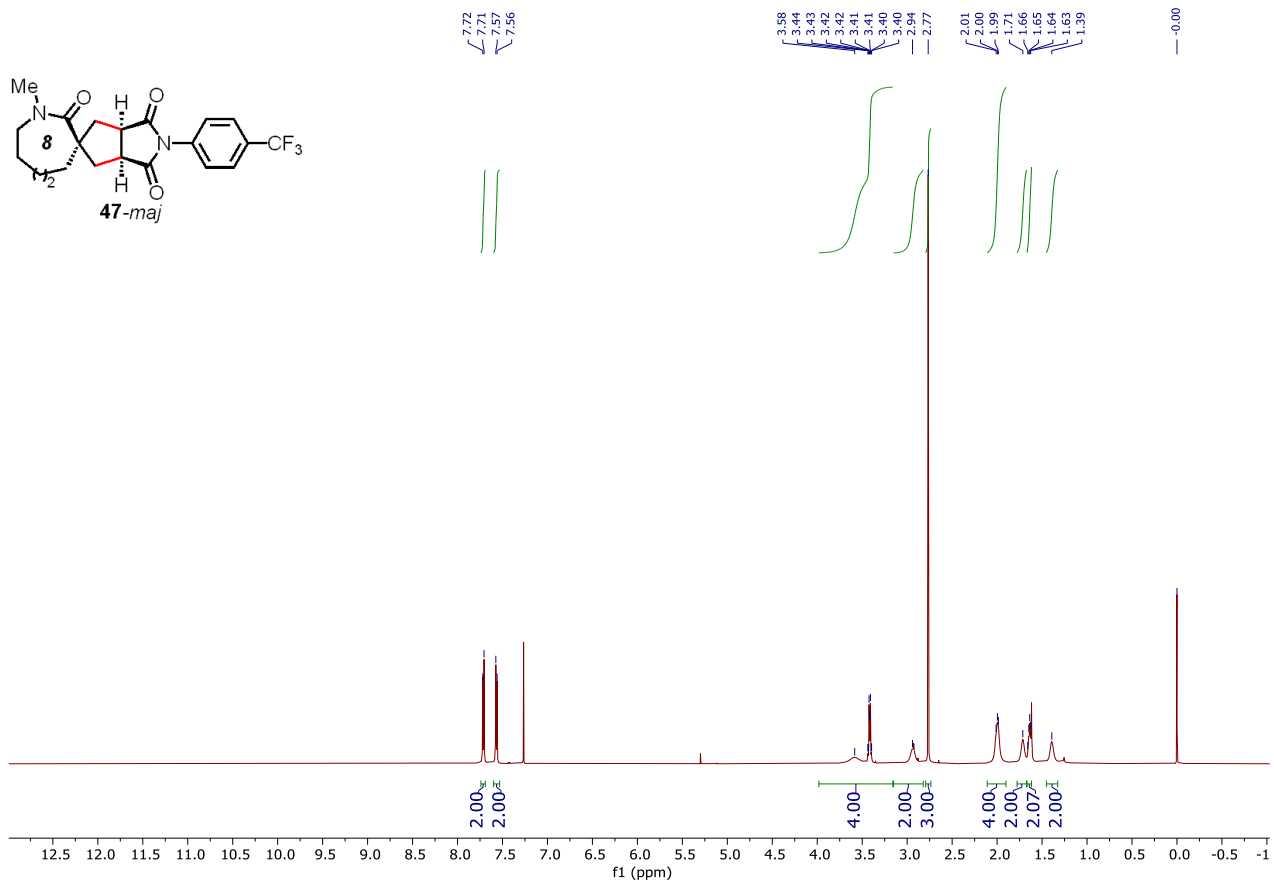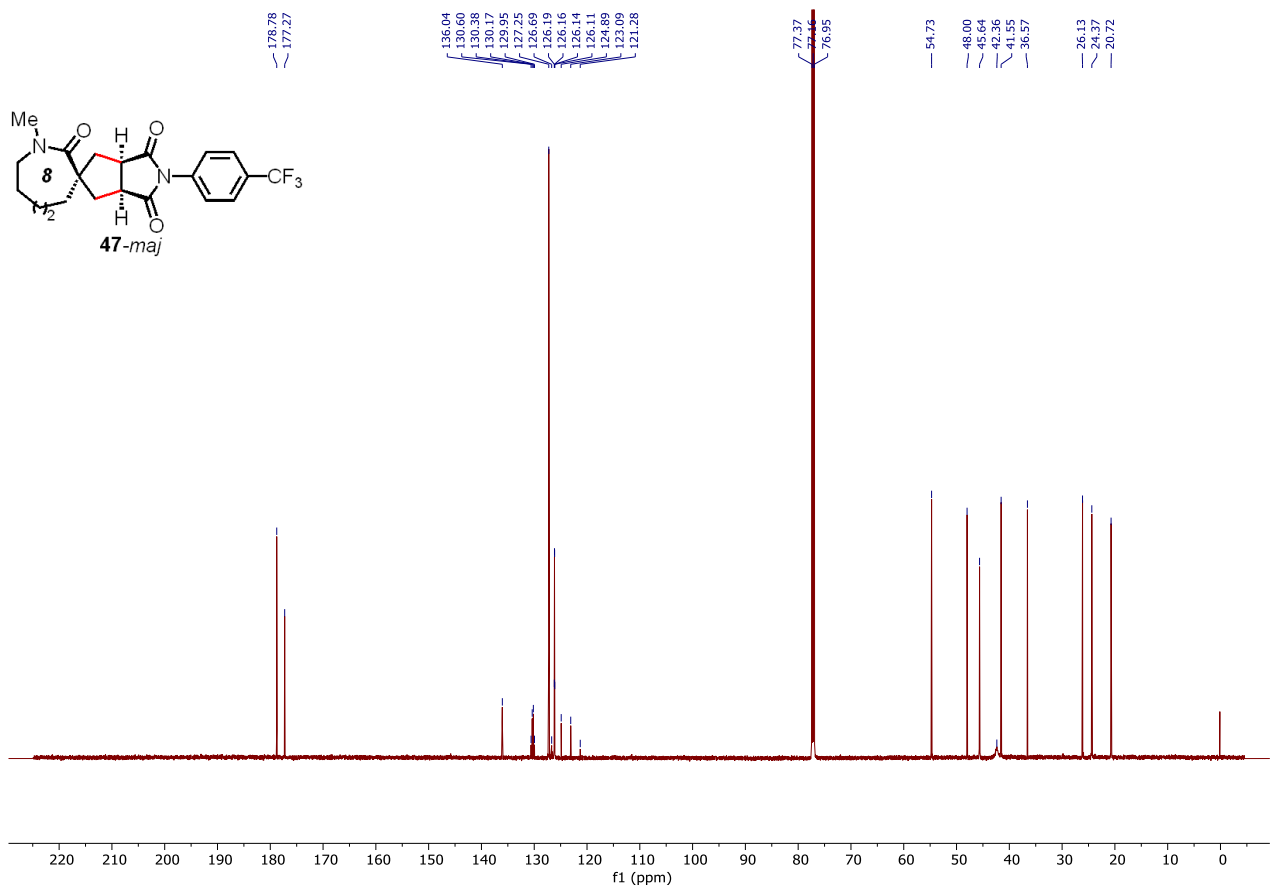

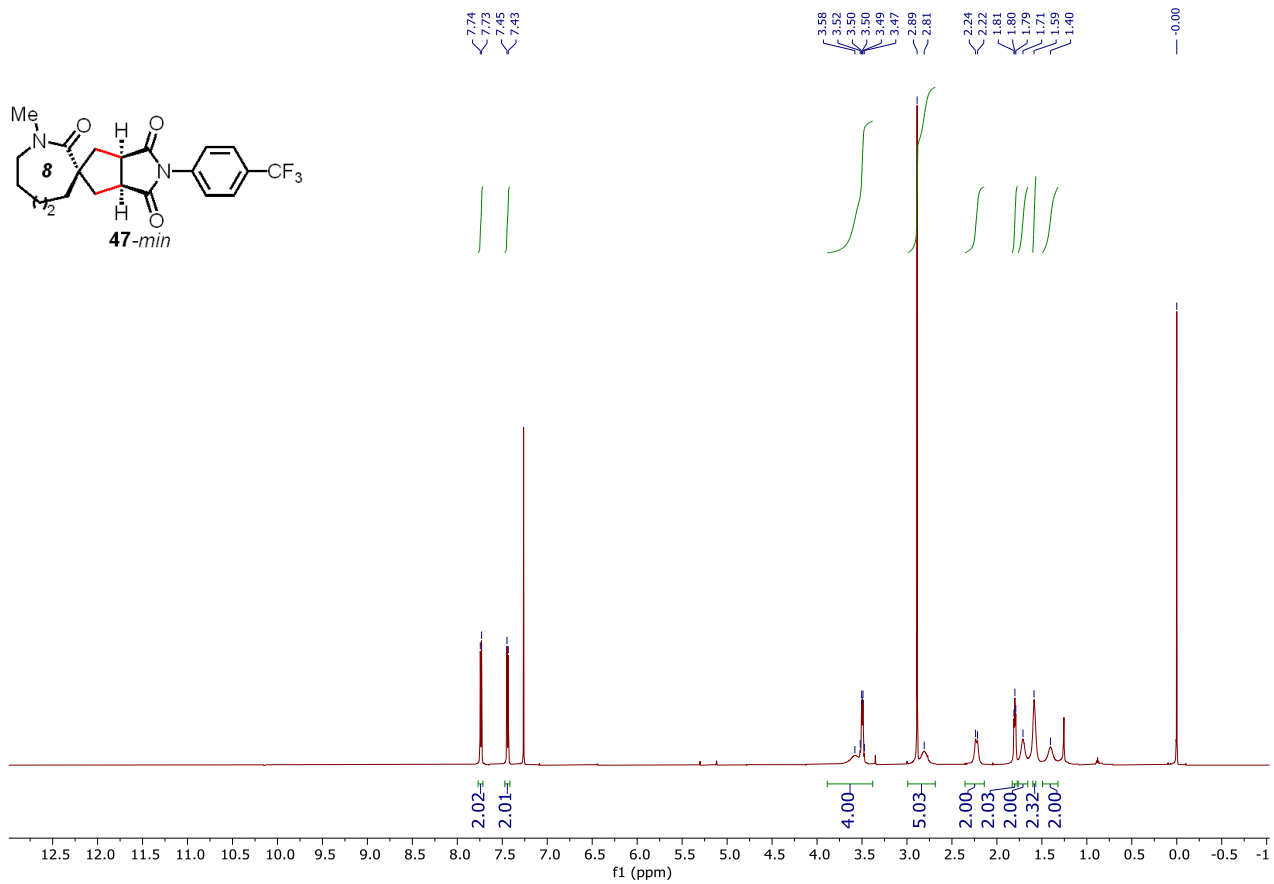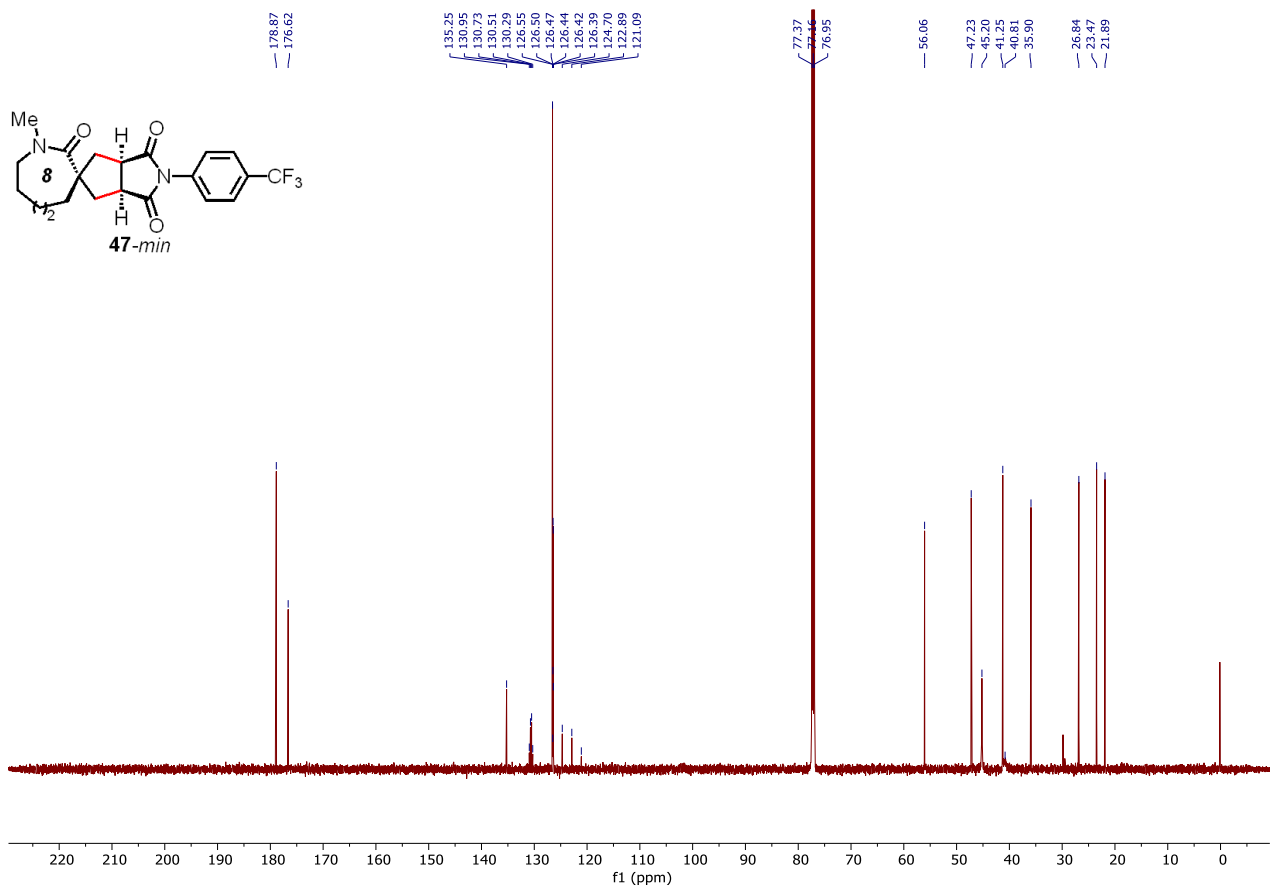

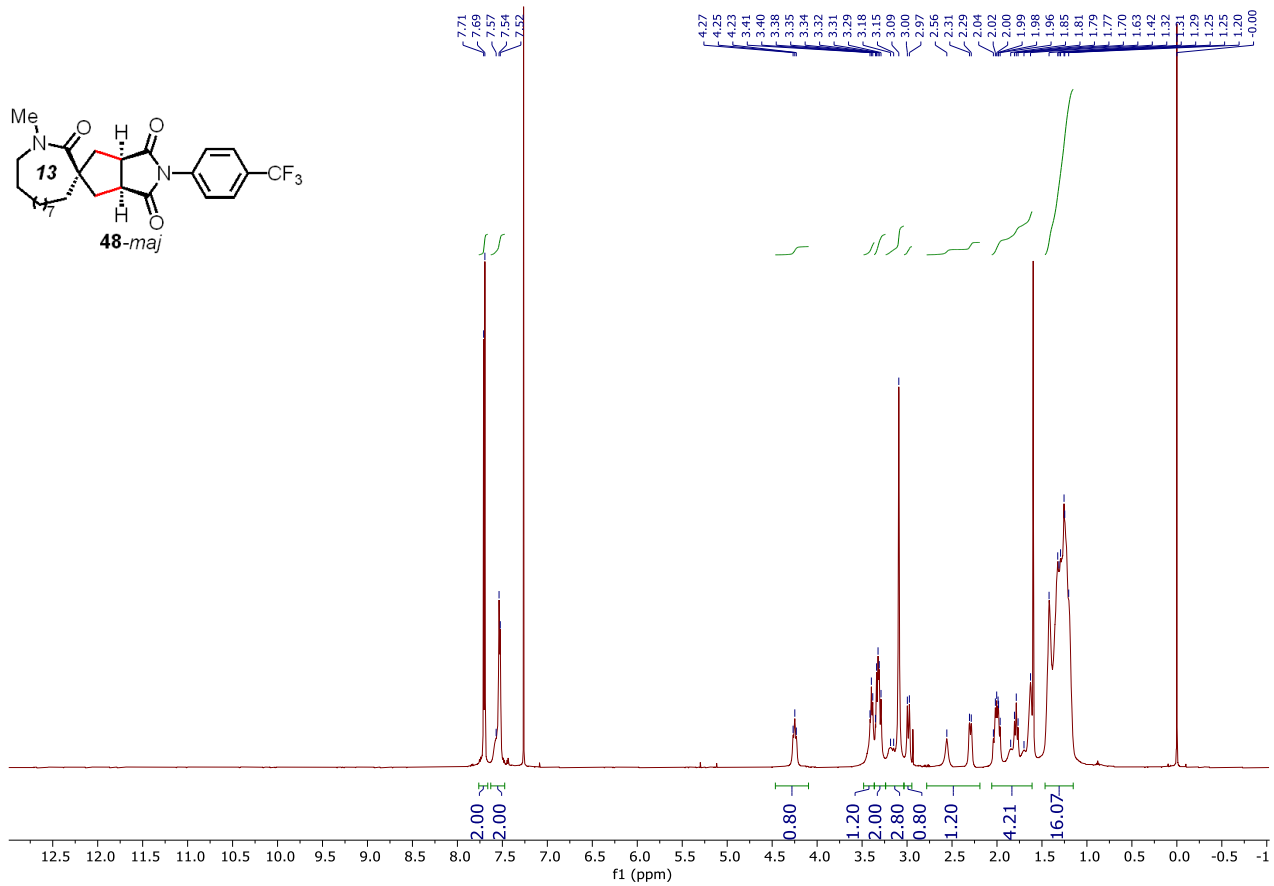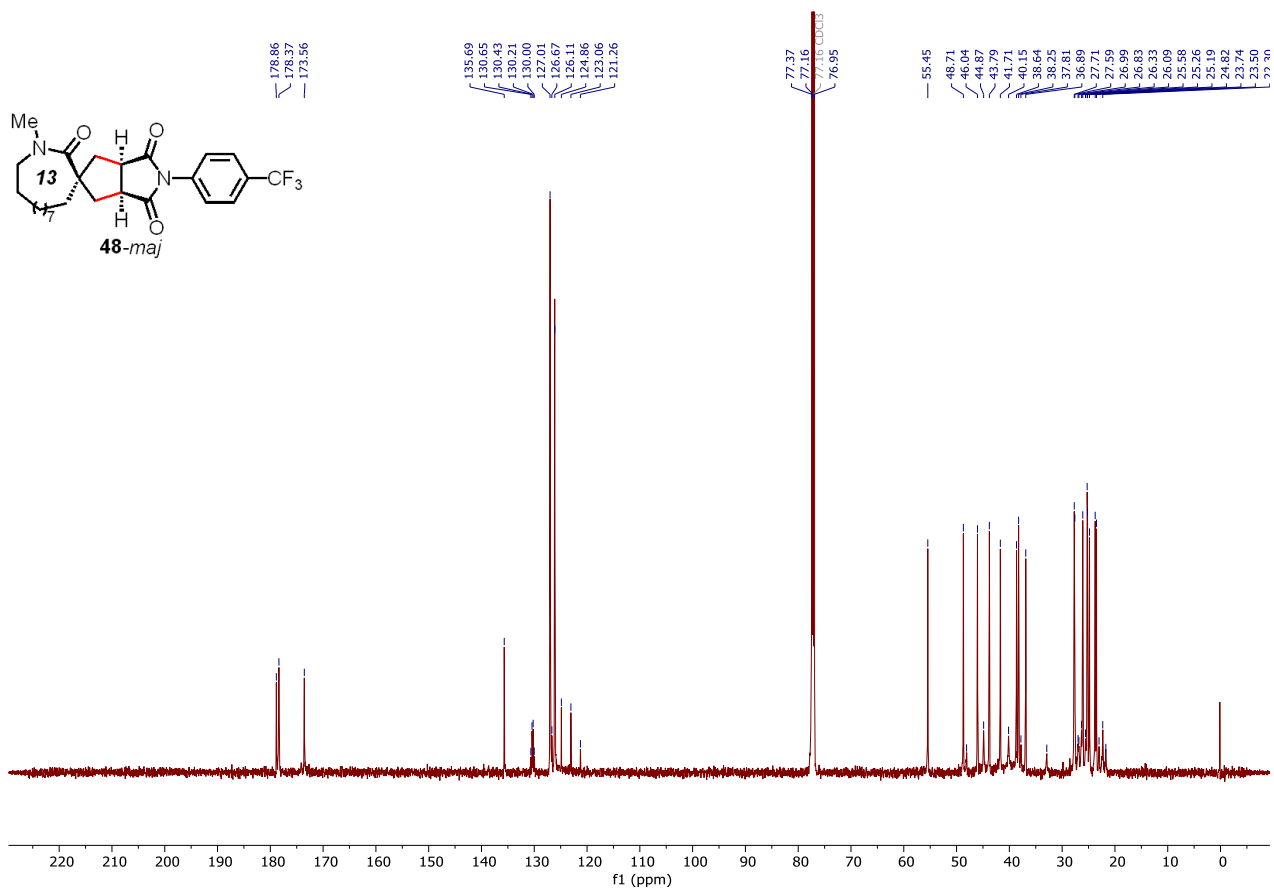

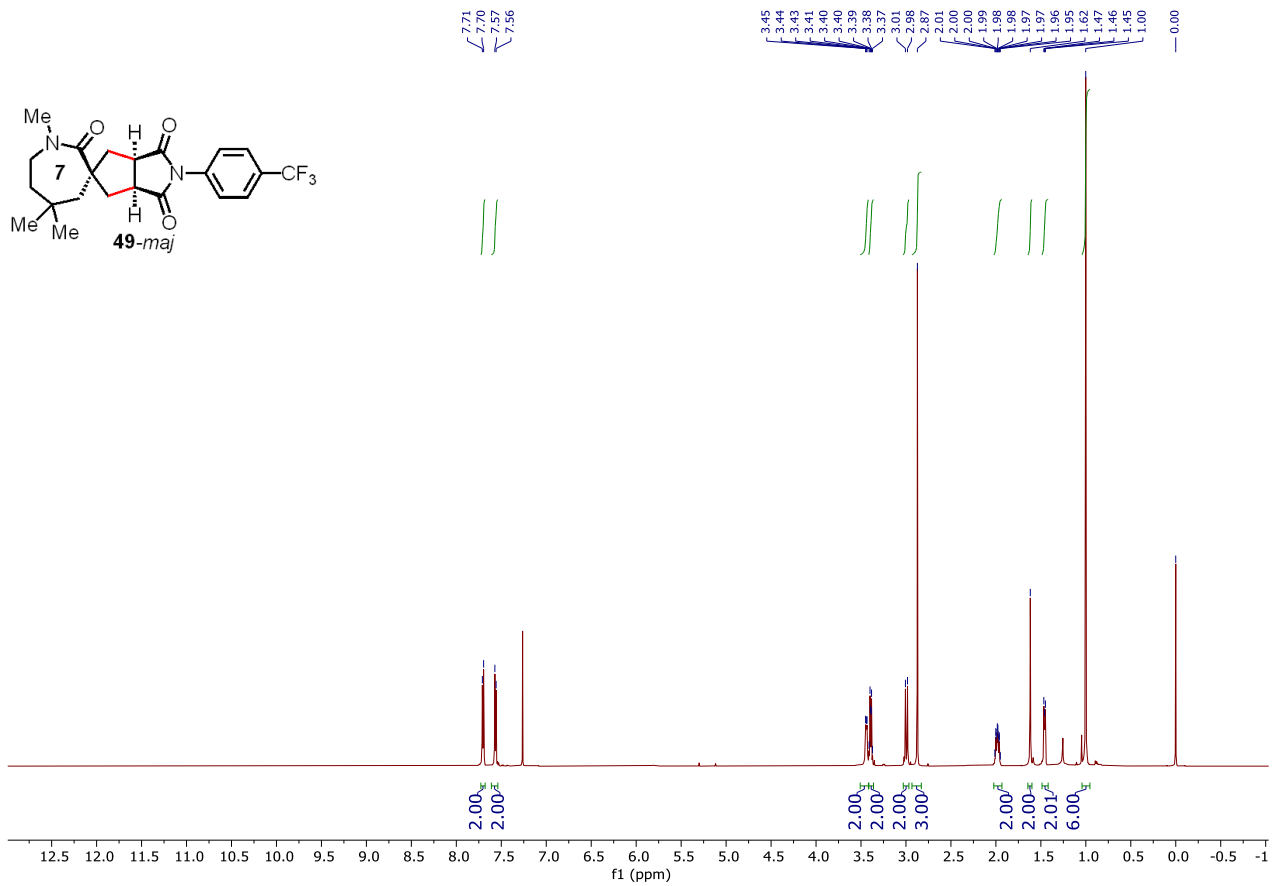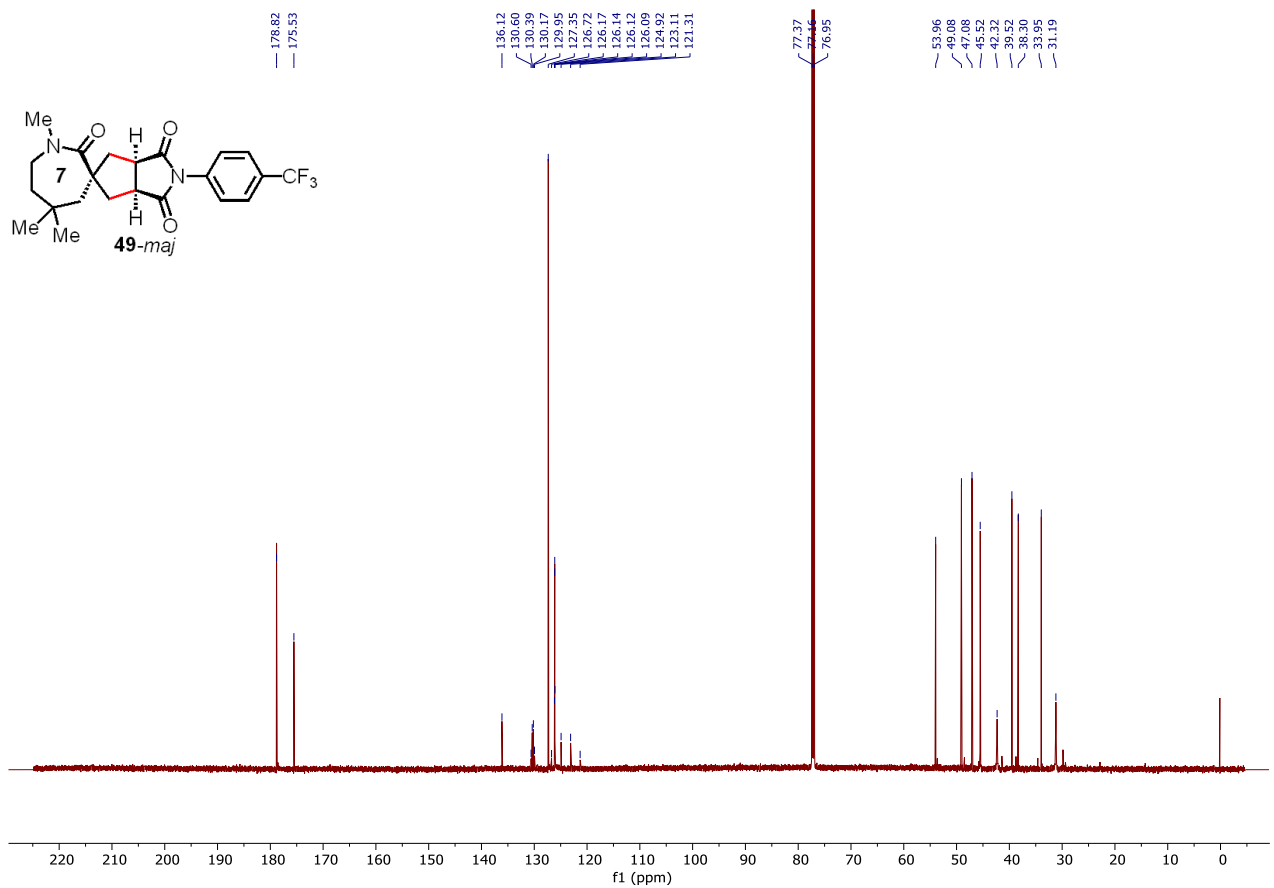

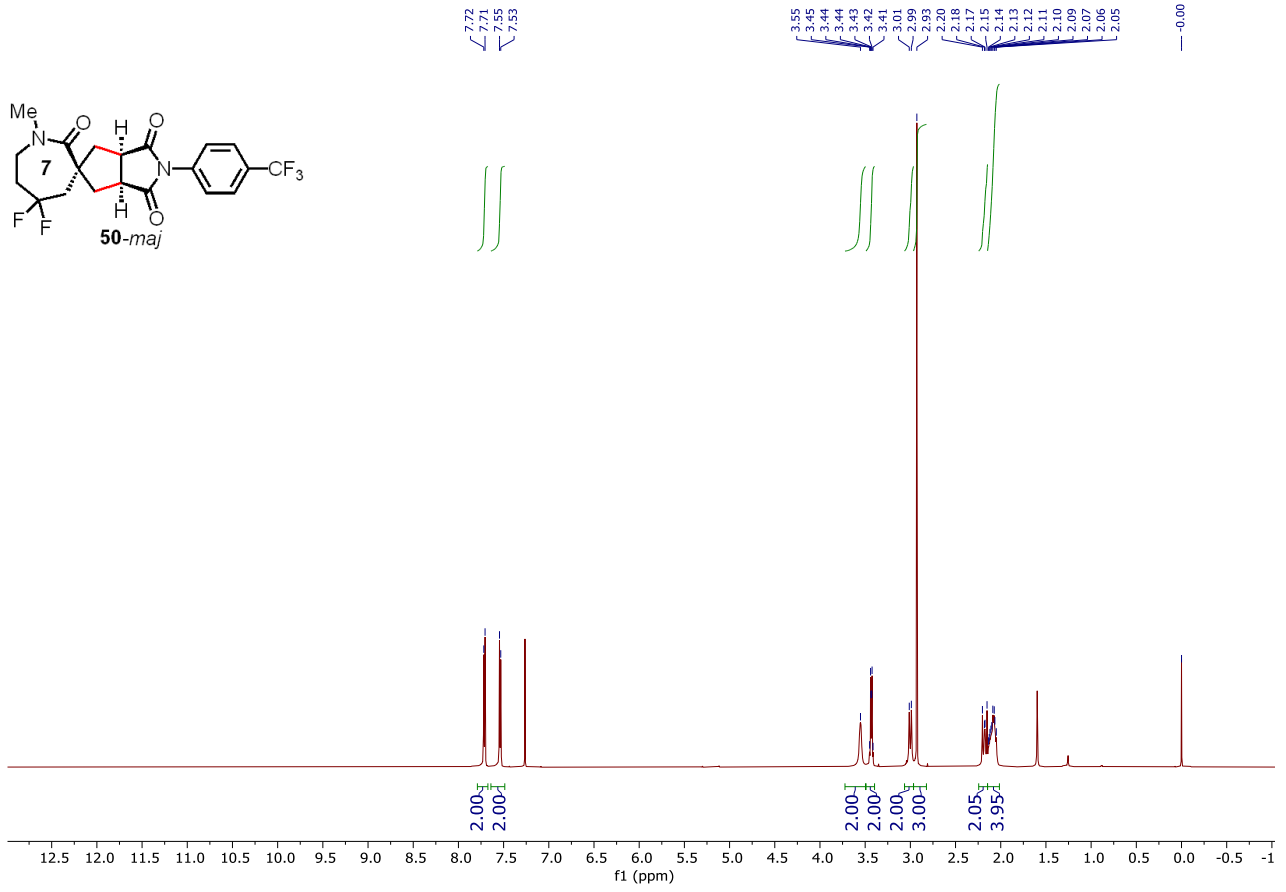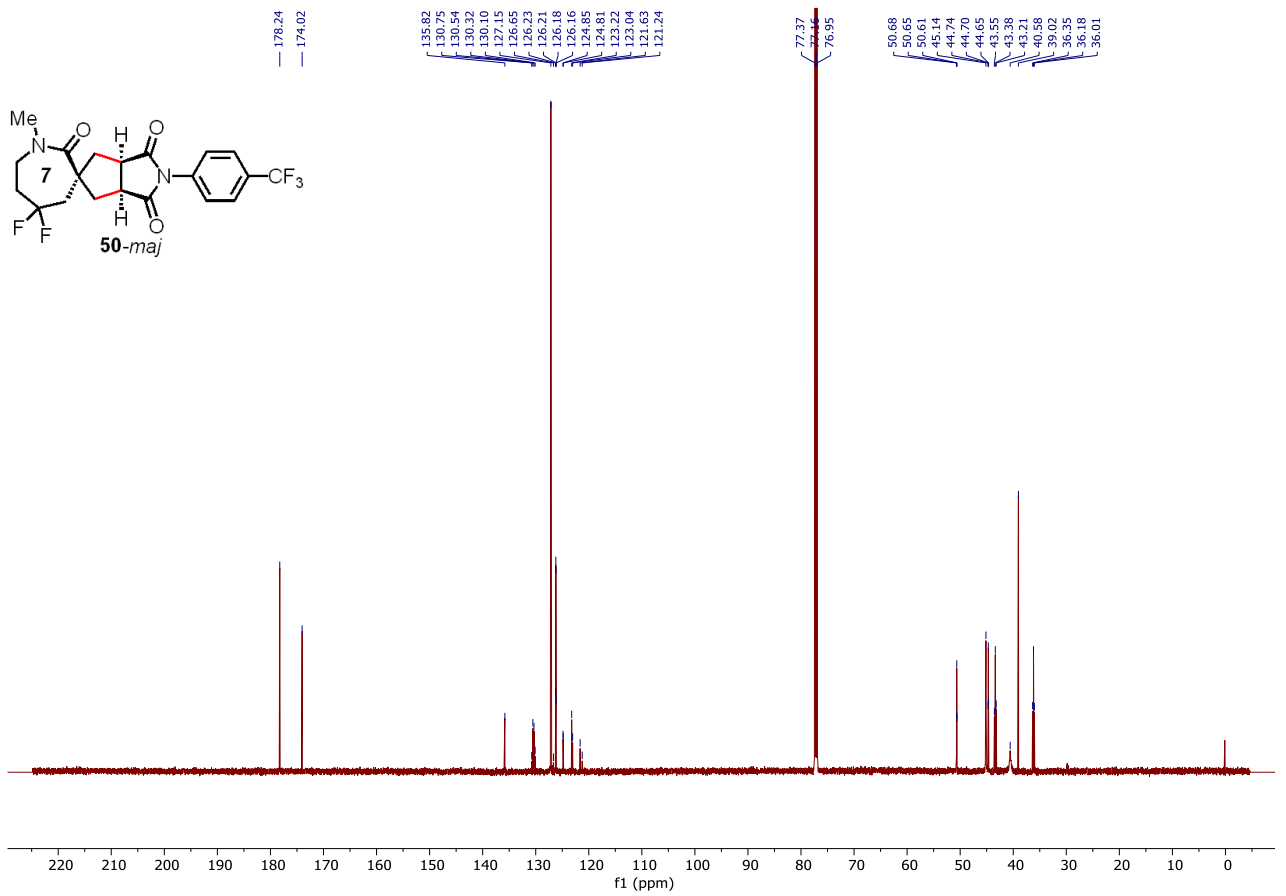



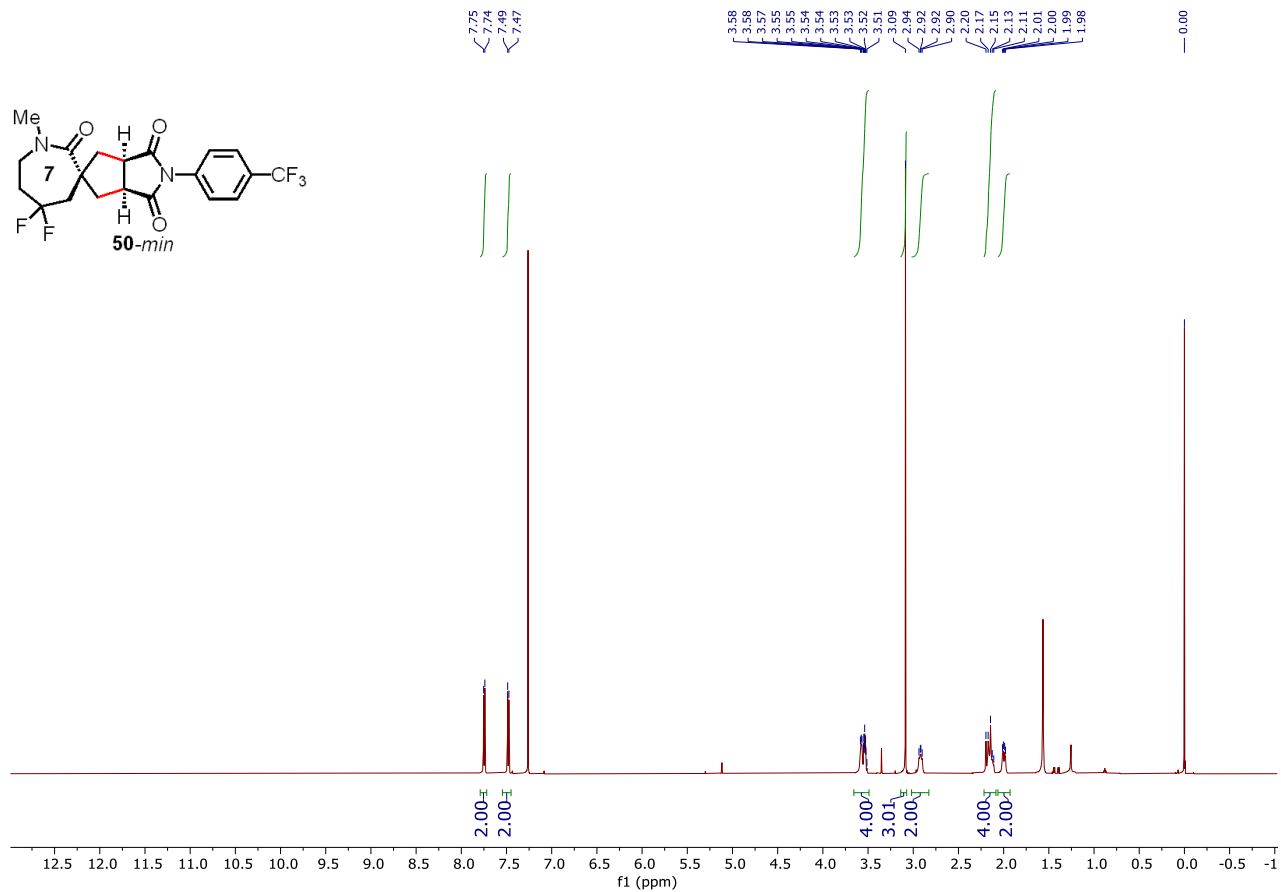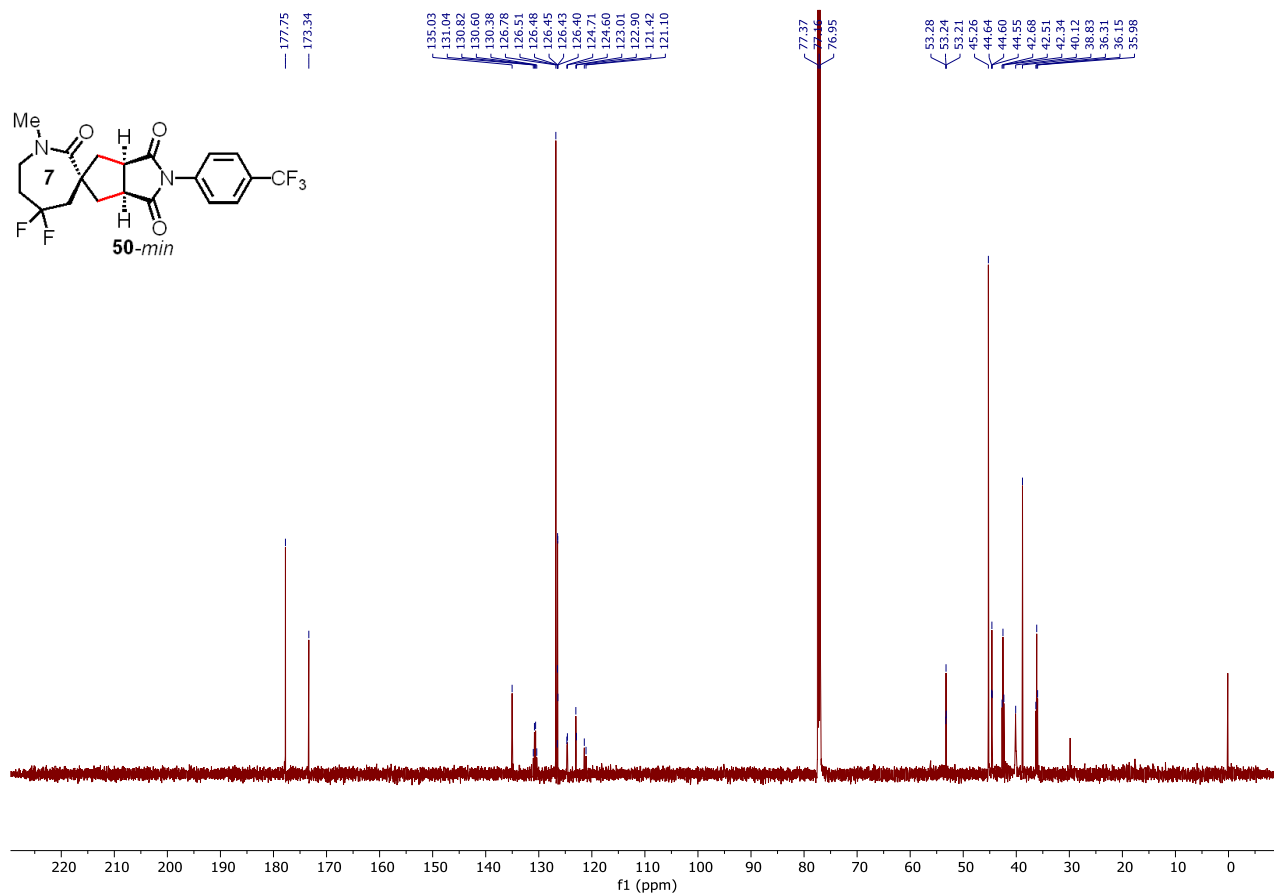

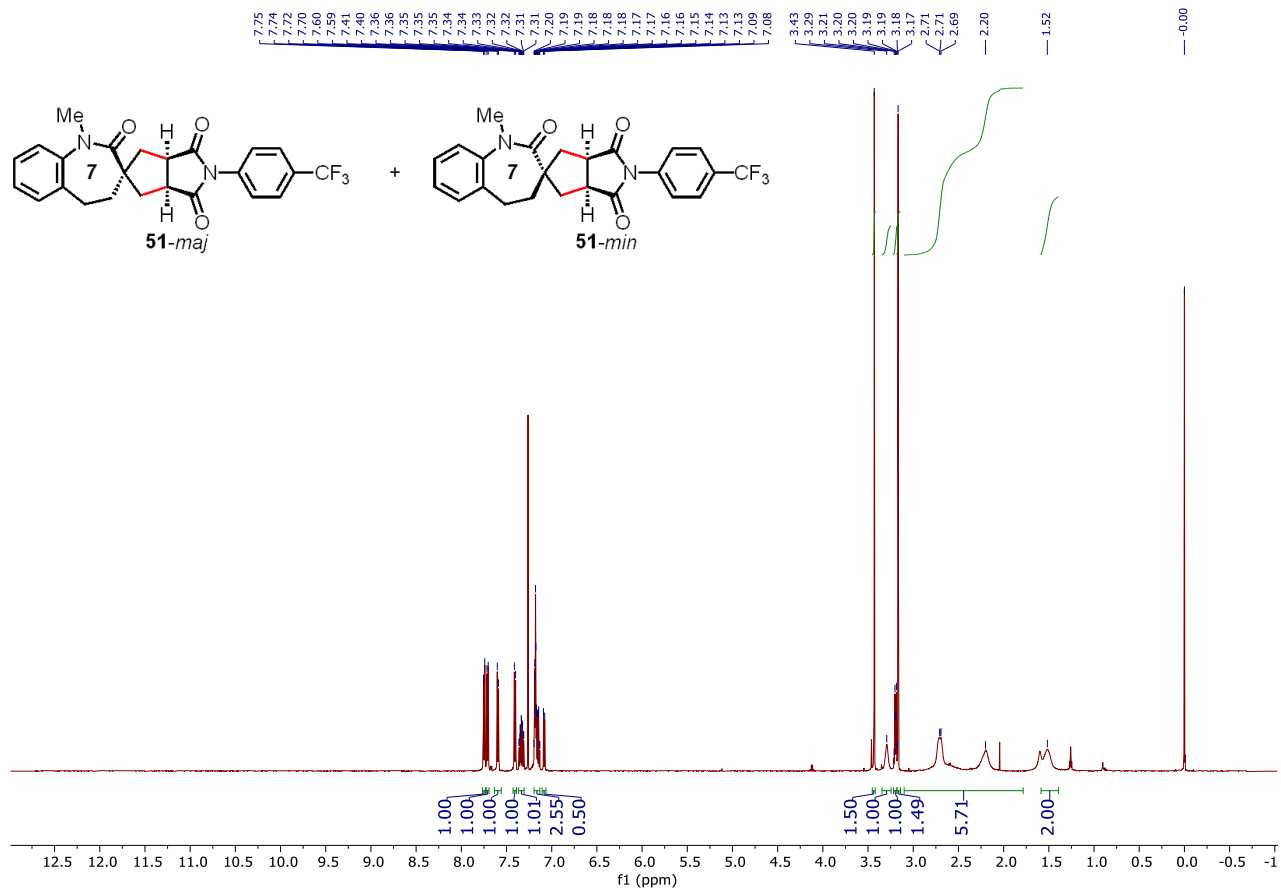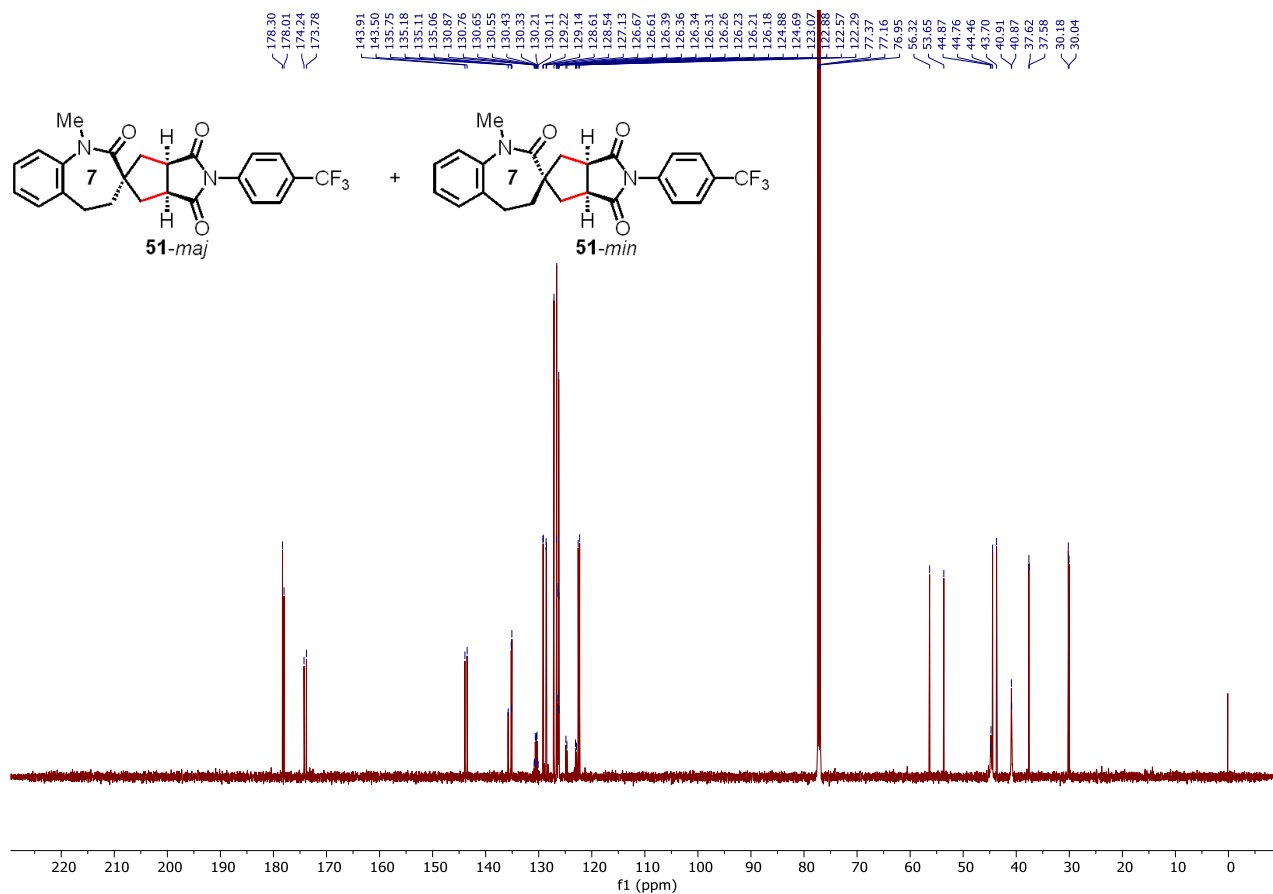

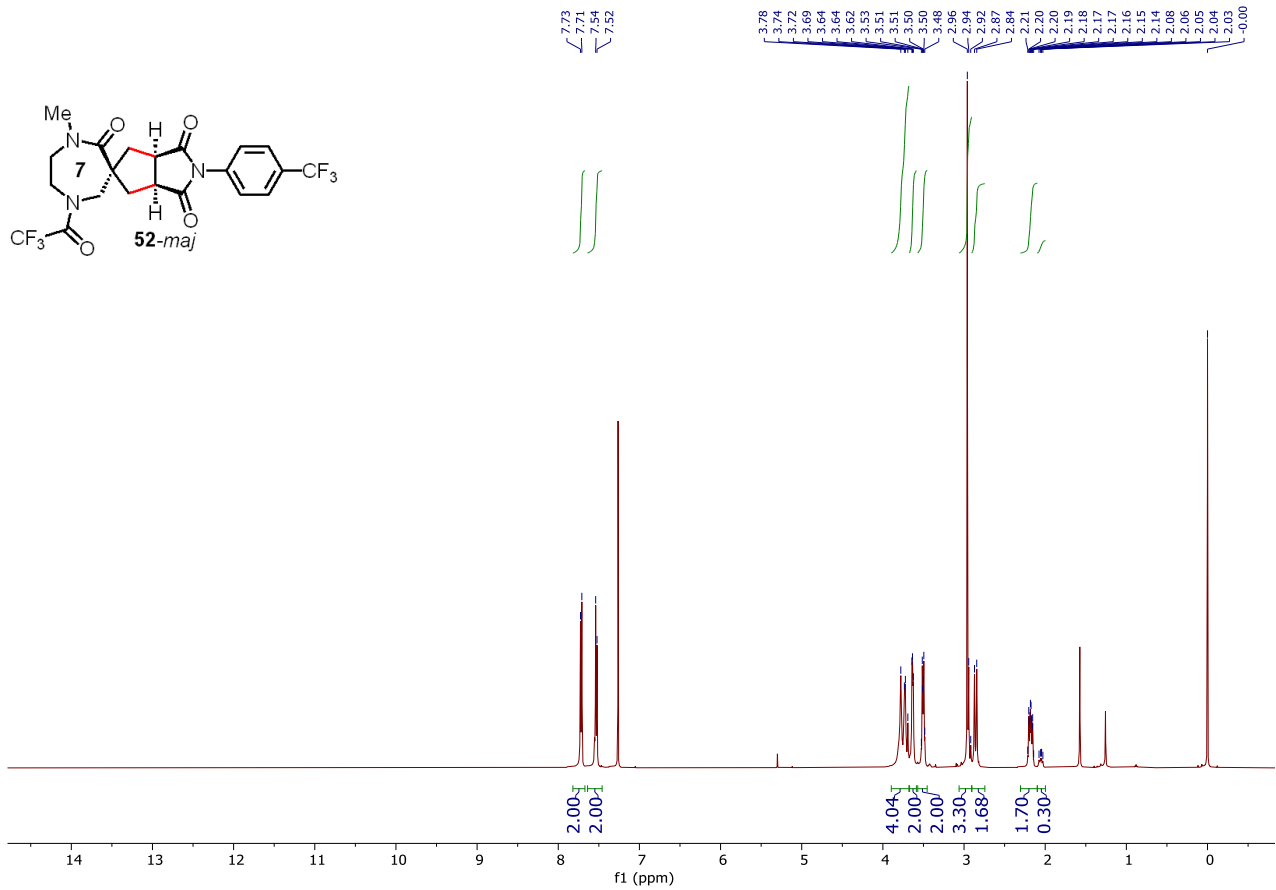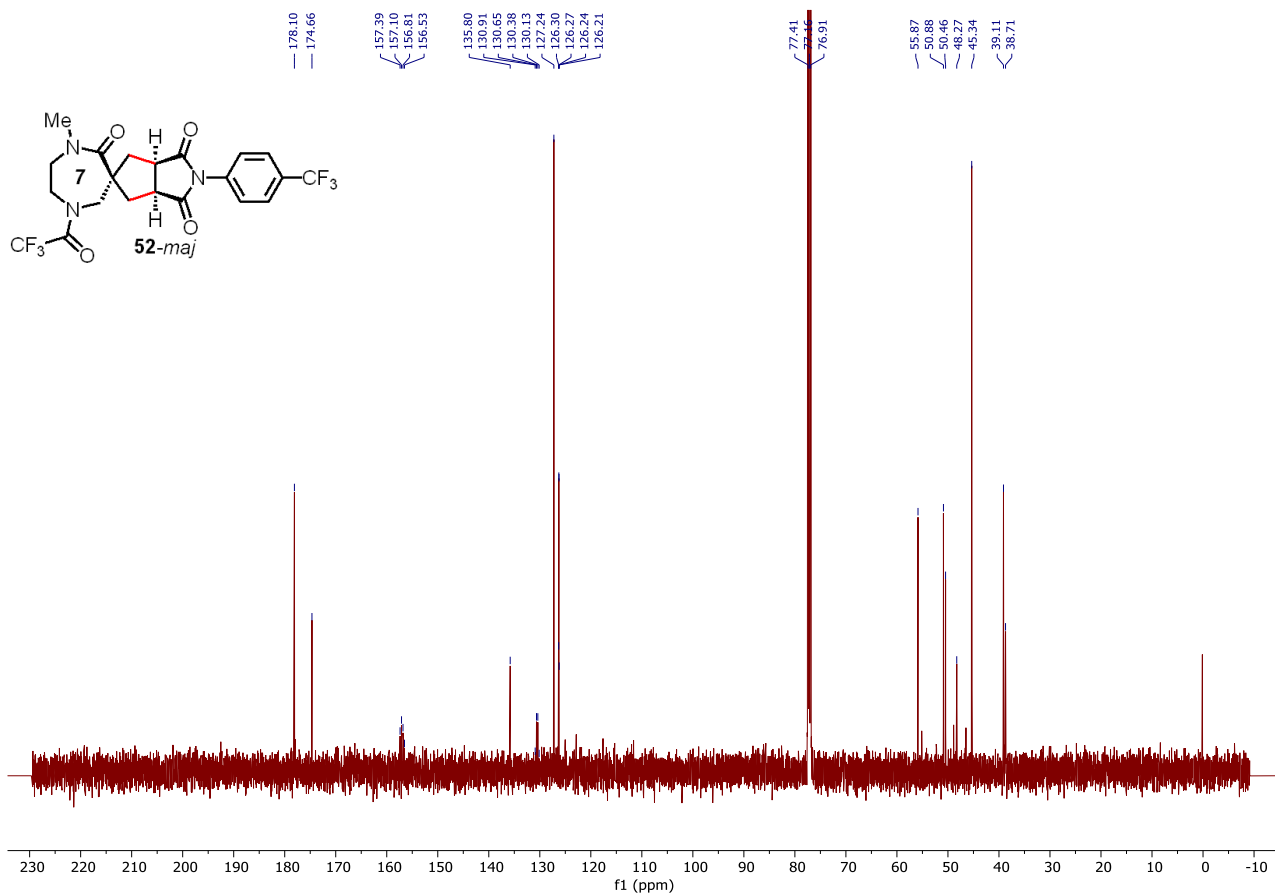

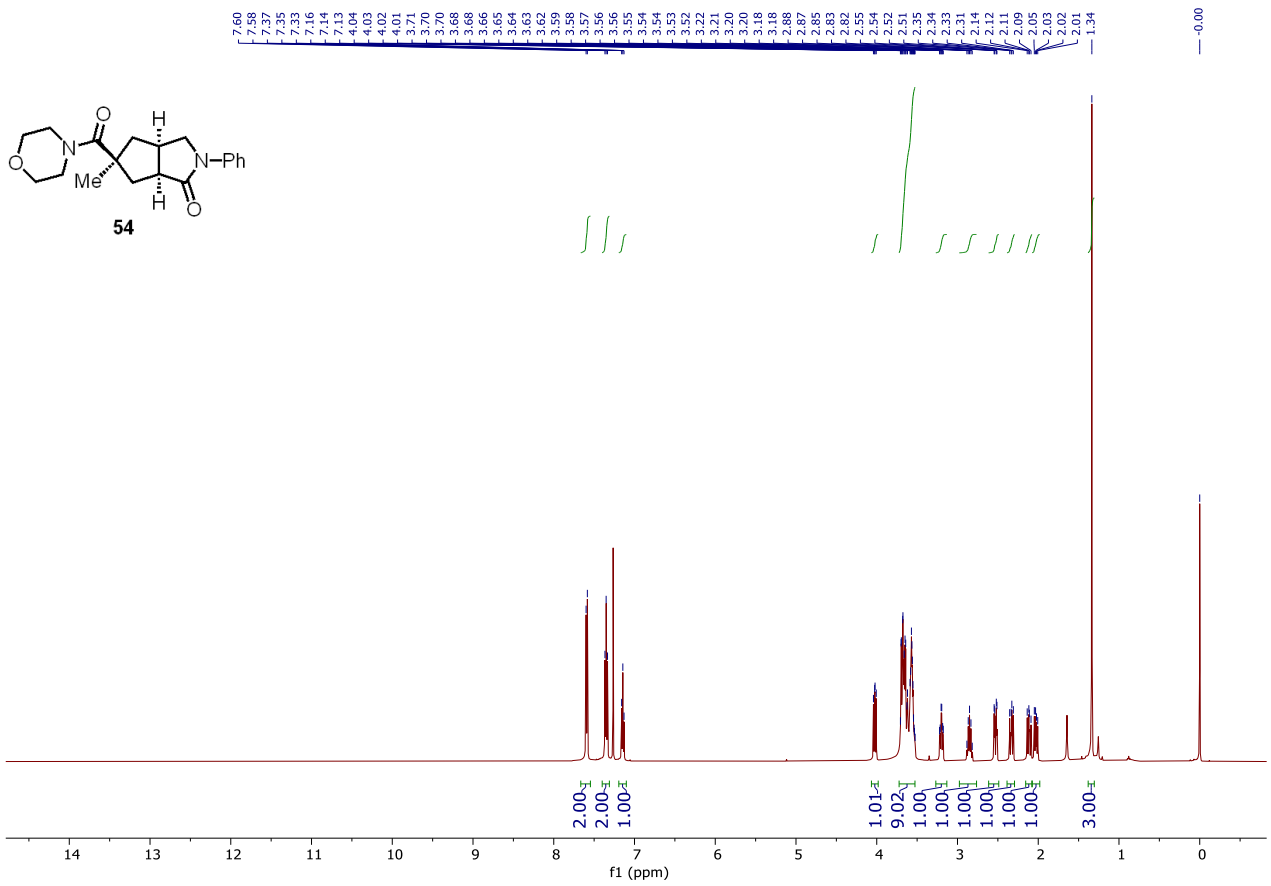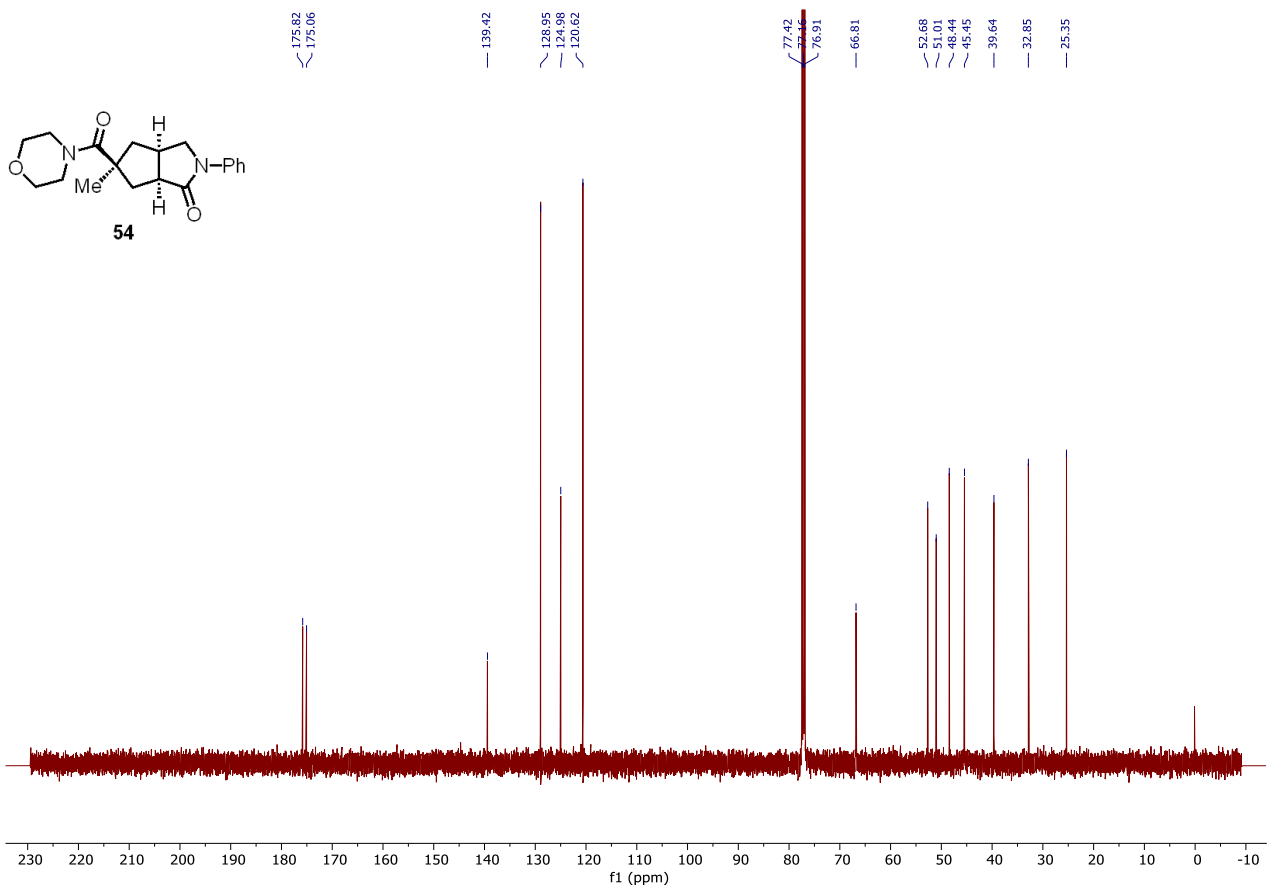

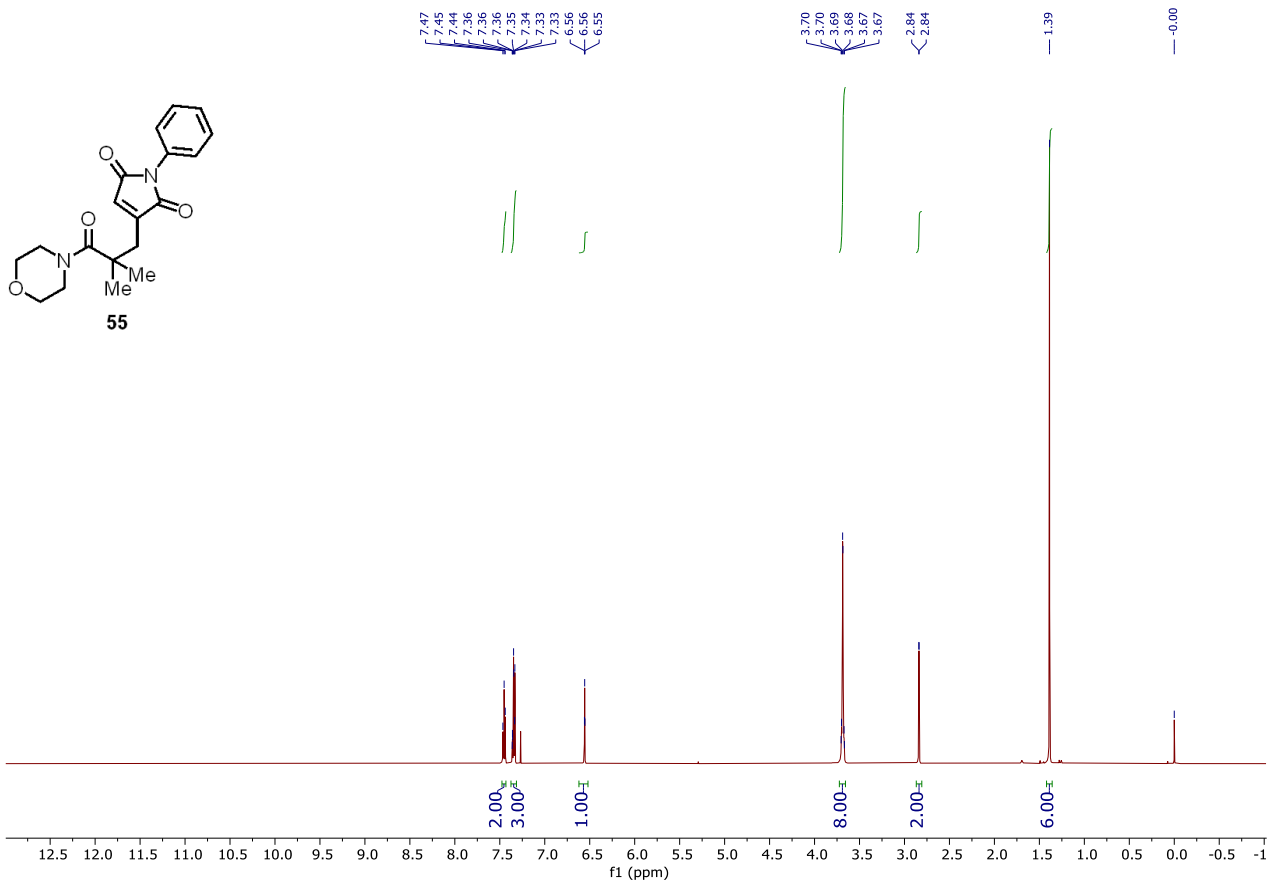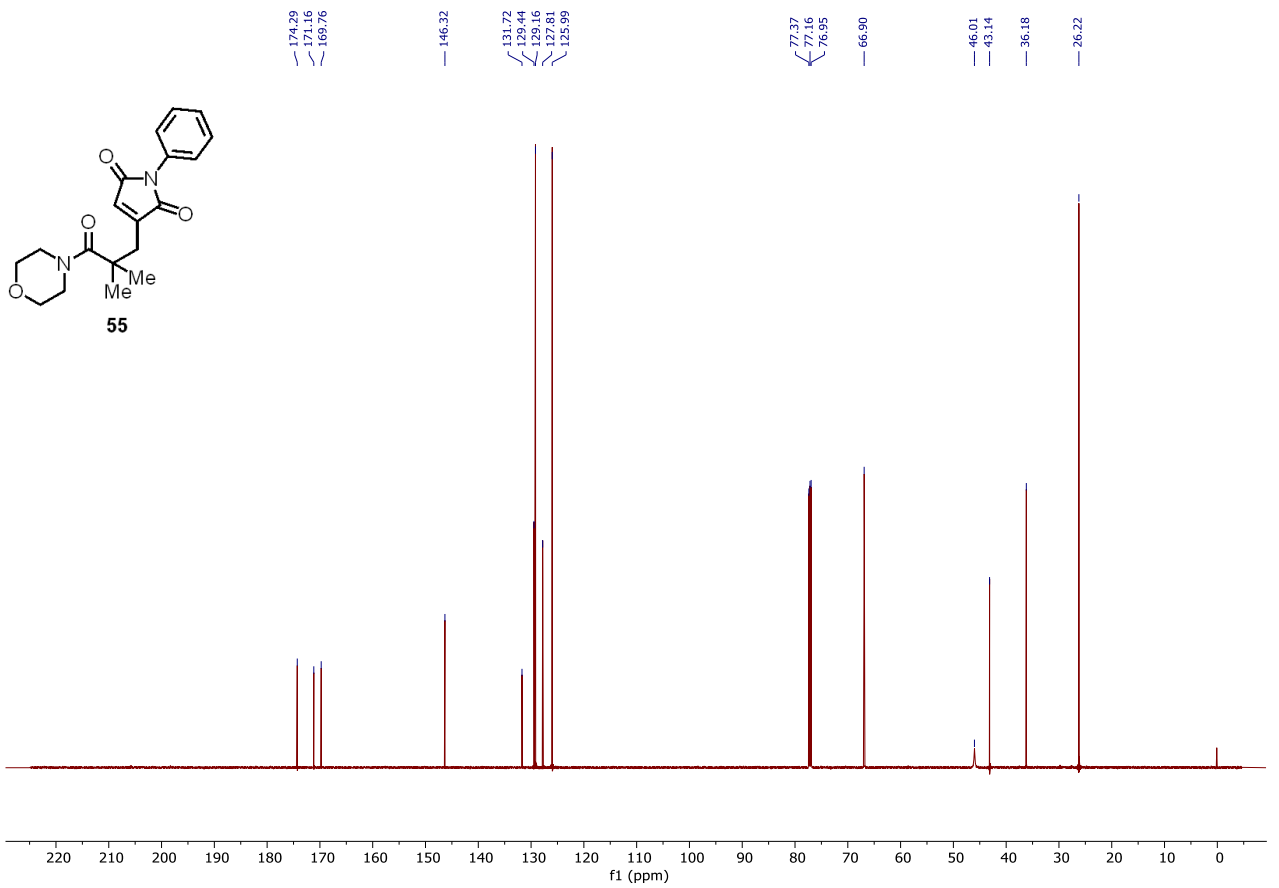

Supplement: NIHMS1639554-supplement-SI.pdf [file NIHMS1639554-supplement-SI.pdf]
